# Supplementary material for: Association between serum ferritin and uric acid levels and nonalcoholic fatty liver disease in the Chinese population
Source: PeerJ. 2023 Oct 26;11:e16267. doi: 10.7717/peerj.16267 (PMC10613435; doi:10.7717/peerj.16267)
Supplement: Supplemental Information 1 [file peerj-11-16267-s001.xls]

## Sheet: NFALD
No	Fatty Liver	Date of specimen	Sex	Age	Present history	Past history	Family history	History of infectious diseases	History of smoking	History of alcohol consumption	Height（cm)	Body weight(Kg)	BMI	Systolic blood pressure	Diastolic blood pressure	Waist circumference(CM）	Hip circumference(CM）	Waist-to-hip ratio	Heart rate	Bone mineral density T value	Bone mineral density Z value	ALT	AST	Albumin	FPG	Creatinine	UA	TG	TC	HDL	LDL	ALP	GGT	AFP	Hb	White blood cell count	Neutrophil granulocyte percentage	Ferritin	Insulin	HOMA-IR
1	1	2015-08-11	2	41	0	0	0	0	0	0	160	64	25	128	79	76	97	0.783505	82	-0.775	-0.201	32	28	47.5	5.15	49	218	1.76	5.22	1.52	2.91	64	34	2.43	128	5.51	59.5	21.72	6.99	1.59993
2	1	2015-08-11	1	25	0	0	1	0	5yrs，7/day	often	169	69	24.1588	112	69	82	93	0.88172	64	2.84	3.325	59	29	49.1	4.4	102.3	462	2.03	3.67	0.91	1.94	70	63	3.14	173	8.08	57.1	137.36	18.32	3.58258
3	1	2015-08-11	2	32	0	0	0	1	0	0	150	59	26.2222	96	66	86	96	0.895833	64	-0.588	-0.34	32	30	47	4.69	49	294	2.38	4.33	1.26	2.15	81	30	1.12	140	6.84	58	49.13	18.76	3.91042
4	1	2015-08-11	2	47	0	0	0	0	0	0	158	64	25.6369	110	68	84	93	0.903226	80	-0.484	0.379	58	34	53.6	6.66	61	323	3.56	4.83	1.13	2.31	96	65	2.4	133	7.02	63.1	60.42	23.86	7.06256
5	1	2015-08-11	1	59	1	1	1	0	36yrs，15/day	Occasional	166	72	26.1286	102	71	86	94	0.914894	68	-1.75	0.192	39	33	49.8	5.34	72	495	2.48	3.92	1.02	1.95	70	28	10.91	168	7.48	61.3	298.4	14.65	3.47693
6	1	2015-08-11	1	51	0	1	1	0	0	0	173	70	23.3887	99	67	85	95	0.894737	68	-0.678	1.071	29	22	47.1	4.97	80.8	412	3.22	4.45	1.02	2.04	79	27	1.79	161	6.81	47.7	159.78	19.79	4.37139
7	1	2015-08-11	1		0	0	0	0	0	0	182	93	28.0763	124	70	96	104	0.923077	66			89	41	51.9	5.52	68.3	556	2.2	5.21	1.29	2.93	104	245	2.18	147	6.42	64.6	270.8	30.53	7.49003
8	1	2015-08-11	1	51	0	0	1	0	10yrs，10/day	Occasional	169	68	23.8087	111	76	83	91	0.912088	69	-0.639	2.388	5	19	19.3	5.04	75	425	2.55	5.2	1.08	2.94	21	24	2.47	157	4.66	52.4	70.47	14.03	3.14272
9	1	2015-08-11	2	51	1	0	0	1	0	0	156	71	29.1749	106	69	91	98	0.928571	68	-0.791	0.293	54	37	46.4	5.37	47	303	1.17	4.81	1.35	2.71	72	26	3.56	137	5.27	60.1	17.12	15.5	3.69933
10	1	2015-08-11	2	59	1	0	1	0	0	0	153	62	26.4855	129	77	93	99	0.939394	72	-0.499	1.084	60	56	46.8	5.45	70	360	2.06	6.12	1.24	3.91	148	75	2.47	142	7.99	63.8	76.79	15.77	3.81984
11	1	2015-08-11	1	33	0	0	1	0	Occasional	0	180	70	21.6049	116	76	81	96	0.84375	66			43	25	51.5	5.28	96	472	1.86	6.09	1.14	3.77	77	36	4.18	172	6.94	62.3	333.26	19.35	4.5408
12	1	2015-08-11	1	32	0	0	1	0	7yrs，10/day	0	172	117	39.5484	194	119	114	120	0.95	70			57	35	51.7	5.78	88	682	2.61	4.35	0.8	2.61	84	41	2.93	165	7.37	54.5	241.28	50.66	13.014
13	1	2015-08-11	2	35	0	0	1	0	0	0	159	60	23.7332	104	66	72	92	0.782609	68			29	23	48.3	4.74	49	338	1.45	4.73	1.23	2.83	66	54	3.05	146	8.61	67.3	49.67	23.76	5.00544
14	1	2015-08-11	1	28	0	0	1	0	0	Occasional	172	82	27.7177	115	76	96	105	0.914286	67			47	27	52.6	4.78	90	542	3.93	5.91	0.99	3.37	70	194	2.15	174	7.11	46.8	164.71	19.79	4.20428
15	1	2015-08-11	1	32	1	0	1	0	9yrs	0	174	91	30.0568	138	98	100	106	0.943396	70			163	71	46.8	5	123.4	592	1.24	5.83	1.44	3.55	90	56	2.88	176	9.26	56.3	302.03	33.33	7.40667
16	1	2015-08-11	1	28	1	0	1	0	10yrs，10/day	Occasional	175	88	28.7347	125	85	101	104	0.971154	68			66	39	49	4.88	70	435	1.77	5.43	0.96	3.66	95	49	2.96	163	6.7	45.6	238.72	30.83	6.68668
17	1	2015-08-11	1	41	0	0	1	0	0	Occasional	164	84	31.2314	146	91	99	104	0.951923	68			41	30	48.4	4.58	91.8	415	1.05	4.16	1.21	2.52	110	27	3.07	159	5.82	62.9	104.01	20.77	4.22785
18	1	2015-08-11	1	43	1	0	1	0	0	Occasional	156	63	25.8876	129	87	89	91	0.978022	68			53	30	51.9	5.89	88	445.7	3.88	5.91	1.15	3.36	68	43	4.74	158	6.21	65.7	223.74	18.06	4.72771
19	1	2015-08-11	1	32	0	0	1	0	10yrs，10/day	0	157	63	25.5588	112	70	83	93	0.892473	68			77	40	46.4	5.9	78.6	455	4.69	4.28	0.77	1.93	124	161	5.45	176	5.84	59.3	155.53	16.46	4.31618
20	1	2015-08-11	1	38	0	0	0	0	Occasional	Occasional	174	78	25.763	105	71	86	99	0.868687	69			26	23	46.2	5.1	66	320	1.21	4.13	1.44	2.09	64	43	3.49	160	6.7	63.1	72.91	23	5.21333
21	1	2015-08-11	1	29	0	0	0	0	6yrs，20/day	Occasional	167	76	27.2509	129	89	89	99	0.89899	70			55	32	43.6	4.93	79.7	342	2.3	5.37	0.92	3.4	71	97	1.96	169	9.46	58.2	70.22	16.43	3.6
22	1	2015-08-11	1	44	0	0	1	0	20yrs，10/day	Occasional	171	94	32.1466	121	83	101	107	0.943925	66			19	15	43.6	5.55	84	436	3.28	5.54	1.1	3.18	80	31	1.93	163	5.87	58	110.17	20.45	5.04433
23	1	2015-08-11	1	21	0	0	1	0	0	Occasional	168	85	30.1162	119	73	96	107	0.897196	69			109	58	54.4	5.41	76	566	3.25	6.43	1.25	3.59	85	164	3.52	141	6.34	49.7	340.96	28.82	6.92961
24	1	2015-08-11	1	42	0	0	0	0	20yrs，10/day	often	170	73	25.2595	130	99	91	96	0.947917	64			36	25	49.8	6.47	68	376	1.65	4.18	2.44	1.26	65	87	4.7	166	5.42	59.5	303.96	17.88	5.14149
25	1	2015-08-11	1	47	0	0	0	0	30yrs，20/day	Occasional	163	72	27.0993	123	76	95	94	1.01064	63			42	27	50.7	9.37	72	416	7.63	5.5	0.81	2.03	132	29	3.41	165	7.1	57.4	376.47	30.23	12.5891
26	1	2015-08-11	1	28	0	0	1	0	Occasional	Occasional	170	100	34.6021	132	89	99	117	0.846154	74			46	37	49.7	5.23	92	386	2.98	5.18	1.01	3	72	41	3.18	154	7.95	64.2	119.82	20.95	4.86971
27	1	2015-08-11	1	28	0	0	0	0	0	Occasional	178	76	23.9869	93	66	86	97	0.886598	62			80	32	50.1	5.18	67	382	1.63	4.3	0.96	2.57	73	173	2.84	164	5.64	48.5	129.79	26.23	6.03873
28	1	2015-08-11	1	27	0	0	0	0	0	0	176	92	29.7004	126	78	98	108	0.907407	68			72	32	51.1	5.36	75	490	0.85	4.55	1.16	2.75	108	48	0.86	152	8.89	55.1	166.42	43.32	10.3198
29	1	2015-08-11	2	32	0	1	1	0	0	0	158	62	24.8358	97	56	76	94	0.808511	68			29	26	49.7	4.58	49	282	1.33	3.58	1.03	1.97	77	22	2.08	141	6.16	56.2	94.31	16.09	3.27521
30	1	2015-08-11	1	31	0	0	0	0	0	0	163	75	28.2284	123	80	92	98	0.938776				16	19	45.5	5.05	83.7	480	1.53	4.87	1.09	3.07	96	9	2.18	157	8.59	56	98.29	28.2	6.32933
31	1	2015-08-11	1	37	0	0	0	0	0	Occasional	166	73	26.4915	114	72	87	98	0.887755	66			56	29	46.7	4.93	83.1	408	2.09	3.55	0.72	1.82	92	54	2.08	161	6.44	54.7	271.87	25.66	5.62239
32	1	2015-08-11	2	51	0	0	0	0	0	0	150	60	26.6667	127	80	84	92	0.913043	78	-0.098	0.986	21	23	49.2	5.46	47	398	2.84	5.58	1.62	2.92	65	26	2.61	137	8.66	58.8	85.23	26.37	6.39912
33	1	2015-08-11	1	54	0	0	0	0	0	0	156	75	30.8185	102	68	98	104	0.942308	80	-1.065	0.199	15	17	47.2	5.06	66	311	1.56	5.95	1.84	3.25	100	14	3.65	141	5.89	60.7	109.77	21.75	4.89133
34	1	2015-08-11	1	43	1	0	1	0	Occasional	Occasional	167	76	27.2509	124	70	92	100	0.92	68			44	25	53.1	5.43	59	335	1.19	6.4	1.54	4.01	101	71	2.6	176	6.54	48.1	340.96	22.47	5.42276
35	1	2015-08-11	1	54	1		0	0	0	Occasional	167	75	26.8923	154	91	92	96	0.958333	70			29	28	49.3	6.25	90	280.2	2.14	5.58	1.39	3.55	153	33	2.7	169	5.77	62.6	71.23	19.88	5.52222
36	1	2015-08-11	1	33	0	0	0	0	0	0	166	65	23.5883	105	61	86	93	0.924731	64			144	66	48.2	4.64	66	467	2.34	4.73	0.97	2.79	77	159	8.24	154	6.82	56.3	101.4	19.38	3.99659
37	1	2015-08-11	1	53	0	0	0	0	30yrs，20/day	often	160	65	25.3906	123	85	87	97	0.896907	90	0.18	1.982	60	42	48.7	5.37	95	375	2.53	4.93	1.31	2.63	100	97	3.35	154	7.57	56.7	279.14	26.14	6.23875
38	1	2015-08-11	1	48	0	0	1	0	30yrs，20/day	often	173	84	28.0664	104	72	95	104	0.913462	68	-2.16	-0.498	65	38	47.1	5.92	96	394	2.6	6.01	1.38	3.61	69	77	3.76	157	7.93	67.4	275.29	20.67	5.43851
39	1	2015-08-11	2	45	1	0	1	0	0	0	158	71	28.441	123	73	94	105	0.895238	72	-0.493	0.267	30	25	45.5	5.13	65	342	1.36	4.78	1.39	2.68	56	21	3.29	134	4.89	63.3	56.47	15.82	3.60696
40	1	2015-08-11	1	57	1	0	0	1	0	Occasional	166	79	28.6689	139	84	97	101	0.960396	63	-1.009	0.889	68	49	48.6	7.42	75	399	1.15	4.37	1.44	2.36	75	54	3.21	152	6.56	46.8	190.37	23.67	7.80584
41	1	2015-08-11	1	49	0	0	0	0	0	Occasional	158	67	26.8386	117	82	89	95	0.936842	63			34	43	47.7	4.73	101	411	1.53	4.73	1.27	2.81	91	50	4.89	175	5.22	63.2	111.45	11.96	2.51426
42	1	2015-08-11	2	50	0	0	0	0	0	0	155	58	24.1415	129	77	84	92	0.913043	82	2.743	3.77	14	16	47.4	6.09	67	262	2.1	4.99	1.46	2.62	32	33	1.94	149	6.68	51.3	87.62	18.1	4.89907
43	1	2015-08-11	1	44	1	0	1	0	0	often	166	81	29.3947	133	90	92	102	0.901961	70	-2.377	-0.846	36	23	46	6.03	92.3	523	4.73	5	0.93	2.1	75	66	5.04	156	6.99	47.9	143.34	26.62	7.13416
44	1	2015-08-11	2	58	0	0	0	0	0	0	161	72	27.7767	118	74	89	103	0.864078	82	0.002	1.519	42	34	49.9	5.86	67.8	385	2.63	6.18	1.41	3.75	152	82	3.48	118	5.95	46	126.29	18.65	4.85729
45	1	2015-08-11	2	51	1	0	0	0	0	0	154	71	29.9376	129	73	91	104	0.875	64	-1.528	-0.444	61	39	48	6.05	71.3	497	1.65	5.53	1.07	3.42	98	33	1.61	137	7.3	66.8	298.82	19.35	5.203
46	1	2015-08-11	1	46	0	0	1	0	30yrs，10/day	0	173	76	25.3934	112	64	89	97	0.917526	68	-1.303	0.295	52	37	50.4	5.5	84	294	2.13	6.39	1.38	3.9	101	43	2.89	175	7.79	60.8	152.74	22.59	5.522
47	1	2015-08-11	1	34	0	0	0	0	3yrs，5/day	Occasional	167	59	21.1553	123	75	75	90	0.833333	68			27	30	55	4.74	70	514	1.46	4.47	1.32	2.53	114	23	3.82	148	5.5	63.6	371.12	13.58	2.86085
48	1	2015-08-11	1	31	1	0	0	0	20yrs，10/day	Occasional	180	95	29.321	140	92	93	108	0.861111	66			87	41	49.3	5.2	78	501	5.45	4.21	0.76	1.73	90	47	2.4	171	7.29	57	198.07	57.46	13.2796
49	1	2015-08-11	1	51	1	0	0	0	0	0	167	70	25.0995	135	83	85	96	0.885417	62	-2.517	-0.768	17	27	49.2	4.7	111	655	2.07	4.48	0.91	2.61	142	109	2.87	132	8.57	57.3	15.82	16.01	3.34431
50	1	2015-08-11	1	52	1	1	1	0	occasional	often	171	67	22.913	116	83	94	100	0.94	72	-1.371	0.405	21	23	48	6.72	76	341	4.31	5.03	0.85	2.62	42	43	4.02	148	4.18	43.5	237.86	19.77	5.90464
51	1	2015-08-11	1	42	0	0	0	0	0	Occasional	169	75	26.2596	115	73	90	97	0.927835	68			24	20	53.6	4.48	62	532	1.94	4.93	1.4	2.76	68	31	2.05	168	6.43	57.8	231.23	26.66	5.3083
52	1	2015-08-11	2	51	0	0	1	0	0	0	159	53	20.9644	119	71	74	90	0.822222	60			27	18	50.5	5.13	57	281	2.19	7.72	1.62	4.86	73	33	4.09	148	4.74	48.7	110.12	18.33	4.17924
53	1	2015-08-11	2	52	0	0	0	0	0	0	162	63	24.0055	104	66	83	96	0.864583	64			36	25	45.5	5.33	62.2	345	1.46	7.11	1.8	4.34	79	22	5.49	145	4.93	57	140.73	18.6	4.40613
54	1	2015-08-11	1	51	1	0	1	0	28yrs，20/day	occasional	166	73	26.4915	120	85	89	99	0.89899	66			57	31	48.2	5.92	79	504	4.13	5.4	1.2	2.48	62	69	7.42	126	11.29	58.8	395.29	25.28	6.65145
55	1	2015-08-11	1	29	0	0	0	0	0	occasional	176	70	22.5981	140	81	82	95	0.863158	66	-0.4	0.39	66	39	48.3	4.12	94.1	380	1.43	5.07	1.37	2.98	81	26	5.58	168	7.21	65.7	138.03	18.06	3.30699
56	1	2015-08-11	1	34	0	1	0	0	6yrs，10/day	0	168	81	28.699	122	88	93	102	0.911765	64	-1.576	-0.482	28	25	48.9	5.42	84	391	2.16	5.17	1.12	2.97	71	19	6.17	158	7.31	56.3	290.05	20.16	4.85632
57	1	2015-08-11	1	46	0	0	1	0	0	occasional	166	66	23.9512	128	83	90	97	0.927835	75	0.033	1.631	29	21	48.2	5.08	82	590	2.88	4.21	1.11	2.15	61	82	1.97	130	5.15	49.7	348.45	16.59	3.74565
58	1	2015-08-11	2	41	0	0	0	1	0	0	166	67	24.3141	101	56	84	102	0.823529	76	-0.829	-0.256	21	21	44.8	4.41	48	224.7	0.7	4.23	1.7	2.25	73	15	1.34	137	5.01	64.7	73.12	17.04	3.33984
59	1	2015-08-12	1	36	0	0	0	0	0	0			#DIV/0!					#DIV/0!		1.004	2.201	39	32	50.3	5.25	82	453	2.61	5.02	1.09	2.87	101	64	7.85	156	8.5	46.6	300.32	14.9	3.47667
60	1	2015-08-12	1	26	0	0	0	0	5yrs，10/day	occasional	164	78	29.0006	116	82	90	102	0.882353	64			32	22	51	4.46	70	452	4.32	5.52	0.88	3.05	91	90	2.51	162	8.02	62.5	178.4	22.59	4.47784
61	1	2015-08-12	1	40	0	0	1	0	18yrs，20/day	occasional	167	69	24.7409	111	72	84	96	0.875	66	-2.327	-0.949	39	66	49.7	5.25	95	449	3.09	5.48	1.15	3.1	146	74	2.96	171	6.83	54.9	143.79	11.18	2.60867
62	1	2015-08-12	1	47	0	0	0	0	0	often	159	74	29.271	141	91	102	100	1.02	72	0.932	2.563	30	26	50.7	5.7	89	450	0.98	5.05	1.8	2.85	75	29	2.71	173	4.77	53.5	93.07	15.01	3.80253
63	1	2015-08-12	2	46	0	0	0	0	0	0	158	67	26.8386	120	81	92	99	0.929293	84	-0.245	0.565	56	42	44.3	10.41	56	260	2.29	5.79	1.41	3.54	75	52	5.34	153	7.14	69.1	40.59	13.09	6.05631
64	1	2015-08-12	1	51	0	0	0	0	0	0	162	66	25.1486	131	76	91	96	0.947917	72			31	32	44.8	5.67	84.4	420	1.57	4.17	1.32	2.1	67	43	4.28	153	4.77	59.2	55.53	17.91	4.51332
65	1	2015-08-12	1	51	0	0	1	0	0	Occasional	172	72	24.3375	98	57	91	99	0.919192	56	0.171	1.92	20	31	49	5.14	68	344	1.21	3.31	1.13	1.77	66	27	3.08	130	4.73	54.4	267.81	14.24	3.25305
66	1	2015-08-12	1	38	0	0	0	0	10yrs，10/day	Occasional	165	72	26.4463	100	69	91	98	0.928571	72	-0.864	0.427	59	41	52.6	5.84	89	498	3.69	5.52	0.95	3.01	79	65	3.14	166	7.64	61.7	299.04	13.36	3.46766
67	1	2015-08-12	1	45	0	0	1	0	0	Occasional	169	72	25.2092	142	87	88	99	0.888889	70			20	22	47.5	5.08	81	331	1.76	6.47	1.23	4.03	67	20	2.32	149	7.5	44.7	222.67	29.32	6.6198
68	1	2015-08-12	1	34	0	0	1	0	0	Occasional	171	83	28.3848	116	77	93	104	0.894231	64			24	21	48.6	5.15	90	365	2.89	3.83	0.77	1.86	81	12	11.29	162	7.05	59.2	126.07	16.08	3.68053
69	1	2015-08-12	2	51	0	0	0	0	0	0	160	69	26.9531	121	66	92	101	0.910891	78			70	48	49.2	4.82	78	235	2.39	4.94	1.41	2.61	144	250	7.52	141	6.61	62.2	521.5	19.83	4.24803
70	1	2015-08-12	1	27	0	1	1	0	8yrs，6/day	0	165	87	31.9559	134	81	105	107	0.981308	84			28	20	49.3	6.2	77	469	1.1	5.13	1.03	3.18	74	26	7.08	165	12.39	77.4	528.13	12.63	3.48027
71	1	2015-08-12	1	33	0	0	1	0	Occasional	often	173	82	27.3982	106	72	87	103	0.84466	96			39	29	51.3	4.46	98.2	536	4.54	5	0.82	2.34	68	36	2.96	169	10.68	75.8	493.69	17.11	3.39158
72	1	2015-08-12	2	28	0	0	0	0	0	0	149	55	24.7737	94	68	81	98	0.826531	72			87	47	44.6	5.17	64.3	264	0.54	4.02	1.98	1.63	174	23	3.08	129	7.81	60.5	490.91	15.9	3.65347
73	1	2015-08-12	1	48	1	0	1	1	0	0	175	95	31.0204	125	79	106	109	0.972477	60	0.139	1.801	37	26	48.8	4.84	81	463	1.71	5.55	1.58	3.13	61	57	2.04	154	5.93	61.4	525.35	14.92	3.20946
74	1	2015-08-12	1	51	0	0	0	0	30yrs，20/day	Occasional	162	68	25.9107	118	77	94	97	0.969072	80	-0.861	0.888	31	28	43.8	4.98	94	552	1.86	4.84	1.11	2.91	73	32	6.73	157	9.47	62.8	520.21	17.21	3.80915
75	1	2015-08-12	1	70	0	0	0	0	0	0	169	82	28.7105	106	64	105	106	0.990566	70	-2.052	0.091	43	27	43.1	5.63	108.8	495	2.13	5.63	1.51	3.21	94	30	4.35	161	5.47	60.6	518.29	20.27	5.072
76	1	2015-08-12	1	42	0	0	0	0	0	0	168	81	28.699	131	92	92	99	0.929293		-0.232	1.225	44	30	48.5	7.72	109	561	4.16	5.73	0.99	3.42	82	83	3.85	172	11.08	66.8	529.2	14.54	4.98884
77	1	2015-08-12	1	46	0	0	1	0	0	Occasional	155	59	24.5578	133	71	80	88	0.909091	66	0.751	2.35	56	39	49.2	5.49	78	435	1.18	4.67	1.28	2.86	97	27	5	167	6.9	59.5	513.16	17.54	4.27976
78	1	2015-08-12	1	33	0	0	0	0	0	0	159	52	20.5688	116	64	70	87	0.804598	68	-2.535	-1.496	25	22	52.1	5.08	98	321	1.13	4.55	1.74	2.25	64	13	3.46	157	6.41	55.9	490.7	16.82	3.79758
79	1	2015-08-12	1	54	0	0	0	0	20yrs，10/day	Occasional	164	73	27.1416	118	74	93	93	1	68			64	47	46.7	6.48	88	499	2.54	6.67	1.17	4.17	97	77	2.01	153	9.69	57.9	520.43	24.8	7.1424
80	1	2015-08-12	1	49	0	0	1	1	10yrs，40/day	Occasional	180	108	33.3333	138	98	114	116	0.982759	80	-2.072	-0.38	70	62	45	5.71	96	453	2.17	5.37	1.19	3.24	104	38	4.58	158	6.42	62.1	501.6	18.76	4.76087
81	1	2015-08-12	1	32	1	0	1	0	0	0	176	91	29.3776	114	74	93	105	0.885714	82	2.11	3.091	79	41	47.1	5.44	90.4	427	2.2	5.35	1.53	3.03	58	57	1.16	159	6.17	39.9	501.6	42.06	10.1692
82	1	2015-08-12	1	60	0	0	0	0	0	0			#DIV/0!					#DIV/0!		2.559	4.522	40	30	48.5	10.45	79	233	4.88	5.32	1.05	2.13	78	21	2.74	178	5.42	64	535.19	16.54	7.68191
83	1	2015-08-12	1	38	0	0	1	0	16yrs，10/day	often	170	96	33.218	139	97	100	108	0.925926	76	-1.672	-0.381	85	71	45.4	11.79	81	495	2.42	5.34	1.11	3.32	79	85	3.93	164	6.05	46.2	520.86	28.87	15.1279
84	1	2015-08-12	1	48	1	0	1	0	22yrs，20/day	0	169	72	25.2092	159	103	83	93	0.892473	68	-0.925	0.738	47	34	49.9	5.98	91	349	3.76	4.94	1.1	2.33	118	24	4.28	167	6.68	65.7	360.43	17.67	4.69629
85	1	2015-08-12	1	46	1	0	1	0	21yrs，20/day	Occasional	172	92	31.0979	141	87	100	107	0.934579	84			41	29	47.3	4.95	66	439	3.17	6.34	1.14	3.89	60	53	3.57	156	9.02	60.2	263.96	26.95	5.929
86	1	2015-08-12	1	46	0	0	1	0	10yrs，20/day	often	165	65	23.8751	112	72	85	97	0.876289	72	-1.492	0.107	28	24	46.8	5.12	67	355	2.36	4.96	0.95	3.08	85	41	3.2	169	8.65	52	355.51	12.81	2.91499
87	1	2015-08-12	1	44	0	0	0	0	0	Occasional	158	66	26.4381	133	81	91	95	0.957895	68	-1.055	0.476	24	21	47.3	5.44	81	411	1.41	5.23	1.22	3.27	68	23	2.53	152	6.04	61.7	182.03	15.96	3.85877
88	1	2015-08-12	1	47	0	0	1	0	Occasional	Occasional	164	79	29.3724	118	87	95	102	0.931373	66	-1.565	0.066	66	35	49.8	7.22	89	435	2.2	4.95	1.24	2.9	83	56	4.63	176	6.26	54.2	342.67	14.81	4.75236
89	1	2015-08-12	1	43	0	0	1	0	20yrs，20/day	Occasional	176	79	25.5036	118	71	88	100	0.88	66			47	29	47.9	5.84	114	595	3.49	3.4	0.72	1.23	78	64	3.47	164	10.21	56.4	301.18	18.24	4.73429
90	1	2015-08-12	1	46	0	0	0	0	20yrs，10/day	often	172	82	27.7177	129	89	96	105	0.914286	72	-0.02	1.579	25	28	47.3	5.92	81	565	4.25	5.84	1.02	2.92	46	86	2.82	156	5.28	56.5	135.81	25.93	6.82247
91	1	2015-08-12	1	29	0	0	0	0	0	Occasional	173	87	29.0688	114	78	92	101	0.910891	72			105	44	48.2	5.11	90.2	495	2.54	5.25	1.23	2.87	75	152	4.08	161	7.8	57.1	397.86	26.1	5.9276
92	1	2015-08-12	1	44	0	0	0	0	20yrs，30/day	Occasional	157	70	28.3987	115	70	96	96	1	66	-0.857	0.673	54	32	44.9	5.33	108	523	1.8	4.24	1.17	2.27	147	181	5.44	163	8.73	66.8	177.34	13.57	3.21458
93	1	2015-08-12	1	45	1	0	1	0	0	Occasional	166	73	26.4915	148	98	85	99	0.858586	86			22	18	48.2	5.23	85.4	407	2.6	5.21	1.18	3.03	71	24	2.55	156	5.63	56.7	317.76	17.22	4.00269
94	1	2015-08-12	1	49	1	0	0	0	20yrs，20/day	Occasional	171	82	28.0428	99	66	97	101	0.960396	72	-1.294	0.398	59	37	47.7	7.06	79	331	1.06	3.26	1.27	1.54	107	67	4.34	166	3.63	56.4	308.81	23.49	7.37064
95	1	2015-08-12	1	33	0	0	0	0	0	0	163	72	27.0993	124	78	88	101	0.871287	72			17	29	48.8	5.06	113	458	3.4	5.32	1.01	2.58	32	11	1.97	158	7.25	58.6	203.08	14.78	3.32386
96	1	2015-08-12	1	27	0	0	0	0	8yrs，7/day	Occasional	169	80	28.0102	122	73	88	98	0.897959	72			70	32	46.7	5.37	85.1	578	1.09	4.25	1.02	2.64	93	53	3.44	179	7.01	43.1	201.96	15.88	3.79003
97	1	2015-08-12	2	52	0	0	0	0	0	0	151	60	26.3146	123	67	93	96	0.96875	75	2.731	3.874	55	33	38.9	4.66	67	364	2.48	4.91	1.23	2.58	74	71	2.16	135	6.69	53.5	139.12	16.83	3.48568
98	1	2015-08-12	1	56	1	0	0	0	0	Occasional	157	65	26.3702	119	79	85	94	0.904255	64			19	21	48.2	5.6	77	493	1.66	6.11	1.65	3.54	59	30	6.87	163	5.09	55.4	134.47	9.95	2.47644
99	1	2015-08-12	1	28	0	0	0	0	0	Occasional	178	97	30.6148	126	79	105	108	0.972222	78			49	35	48.1	5.11	76	248	2.14	4.61	1.12	2.63	71	39	2.79	169	6.05	59.8	76.07	15.99	3.63151
100	1	2015-08-12	1	34	0	0	1		9yrs，20/day	Occasional	180	88	27.1605	114	78	96	107	0.897196	70	1.078	2.172	41	20	49.8	5.98	85.9	477	2.79	4.71	1.11	2.51	57	72	4.73	173	6.44	40.8	233.29	15.63	4.15411
101	1	2015-08-12	1	36	0	0	1	0	19yrs，20/day	often			#DIV/0!	115	70			#DIV/0!	72			42	30	45.5	5.58	107.2	505	3.29	5.63	1.38	2.87	115	105	2.24	152	10.68	54	151.94	18.94	4.69712
102	1	2015-08-12	2	34	0	0	0	0	0		152	57	24.6711	108	77	87	90	0.966667	84			25	24	44.5	5.28	47	339	2.72	5.69	1.92	2.68	59	25	2.53	153	7.17	73.4	98.72	20.9	4.90453
103	1	2015-08-12	1	32	0	0	0	0	0	Occasional	182	81	24.4536	119	70	92	99	0.929293	60			71	39	49.9	5.28	86	439	4	4.84	0.75	2.47	81	124	2.29	159	6.68	60.2	367.55	65.34	15.3331
104	1	2015-08-12	1	47	0	0	0	0	0				#DIV/0!					#DIV/0!		-2.292	-0.661	42	25	48.7	7.96	80	348	3.34	5.23	1.2	2.86	75	75	2.6	153	7.51	47.7	294.27	30.57	10.815
105	1	2015-08-12	1	48	0	0	0	0	0	Occasional	166	75	27.2173	126	76	89	99	0.89899	76			30	23	44.2	6.07	93	269	1.68	4.48	1.25	2.52	106	24	3.37	161	4.42	53.4	321.68	18.8	5.07182
106	1	2015-08-12	1	33	0	0	0	1	8yrs，7/day	Occasional	162	58	22.1003	120	78	77	90	0.855556	84			123	55	51.4	5.39	76.2	378	1.26	5.29	1.93	2.87	70	84	4.15	159	5.88	54	377.06	15.09	3.61489
107	1	2015-08-12	2	34	0	0	1	0	0		156	58	23.833	121	76	82	90	0.911111	78			17	19	48.9	5.46	59	288	2.79	6.59	1.12	4.02	64	42	3.1	150	5.31	48.6	38.49	19.78	4.79995
108	1	2015-08-12	1	46	0	0	1	1	27yrs，30-40/day	Occasional	163	63	23.7118	111	64	79	95	0.831579	66	-1.06	0.539	53	28	46.5	4.86	97	338	2.09	4.84	1.03	2.77	80	87	3.86	158	5.29	55.1	288.67	21.14	4.56624
109	1	2015-08-12	1	44	1	0	0	0	24yrs，20/day	Occasional	164	75	27.8852	115	80	93	100	0.93	68	-2.883	-1.353	26	19	45.5	5.46	79	434	2.22	4.39	1.12	2.4	69	29	2.67	159	6.04	51.9	217.62	14.8	3.59147
110	1	2015-08-12	1	30	0	0	0	0	0	Occasional	166	83	30.1205	142	89	97	104	0.932692	80			173	80	51.3	6.9	102	513	2.62	4.64	0.94	2.53	84	73	1.72	168	9	70.6	370.35	43.95	13.478
111	1	2015-08-12	1	64	1	0	0	0	0	Occasional	163	75	28.2284	168	99	99	102	0.970588	66			34	30	50.3	6.17	96	358	1.83	4.69	1.11	2.78	75	27	3.03	174	8.39	60.6	146.27	20.58	5.64349
112	1	2015-08-12	1	34	0	0	1		10yrs，10/day	Occasional	178	74	23.3556	104	72	84	97	0.865979	66			96	49	50.5	5.21	79	352	1.6	4.87	1.31	2.77	88	188	5.16	162	5.17	55.3	91.69	18.68	4.32546
113	1	2015-08-12	1	41	0	0	0	0	0	0	175	75	24.4898	117	89	86	100	0.86		-1.352	0.066	51	37	51.2	5.15	114	586	3.77	5.06	1.09	2.53	91	69	9.37	169	9.3	65.9	353.57	11.84	2.71004
114	1	2015-08-12	1	44	0	1	1		Occasional	Occasional			#DIV/0!					#DIV/0!	60			66	44	46.7	5.98	81	464	3.58	4.67	1.28	2.25	55	100	3.4	157	6.3	60	152.4	21.39	5.68499
115	1	2015-08-12	1	47	1	0	0	0	30yrs	often	162	82	31.2452	119	89	109	101	1.07921	60			66	44	45.7	4.81	79.3	498	0.66	3.69	1.63	1.75	95	175	3.56	206	6.02	46.7	260.7	33.74	7.21286
116	1	2015-08-12	1	42	0	0	0	0	9yrs，20/day	Occasional	167	82	29.4023	109	68	94	104	0.903846	56			41	26	44.5	5.29	90.7	485	1.33	5.21	1.07	3.4	81	34	1.96	164	4.02	48.6	254.55	16.82	3.95457
117	1	2015-08-12	2	58	0	0	1	0	0	0	160	58	22.6562	148	81	77	98	0.785714	78			19	25	49.6	5.75	66	273	1.33	7.35	1.67	4.83	81	12	4.03	151	7.3	62	76.59	16.09	4.11189
118	1	2015-08-12	2	38	0	0	1	0	0	0	161	62	23.9188	97	62	86	100	0.86	72			18	20	48.5	5.03	59	419	1.73	6.83	1.72	4.05	108	14	3.61	142	7.44	67.4	51.28	15.88	3.55006
119	1	2015-08-12	1	63	0	1	1		1yr	0	160	73	28.5156	144	87	93	97	0.958763	84			28	32	43.6	5.16	107.7	503	2.08	5	1.02	3.04	106	14	5.01	164	5.59	59	160.56	12.97	2.97445
120	1	2015-08-12	1	56	1	0	1	0	6yrs，10/day	0	163	66	24.841	134	74	90	90	1	68			24	25	48.3	5	83	375	1.33	5.69	1.17	3.54	87	17	2.48	159	6.86	57.3	377.62	16.84	3.74222
121	1	2015-8-13 8:28:33	2	31	0	0	1	0	0	0	160	65	25.3906	123	76	83	99	0.838384	72			22	21	47.5	4.79	60.9	314	1.84	5.89	1.29	3.55	76	15	2.56	137	8.12	57.9	71.56	24.73	5.26474
122	1	2015-8-13 9:43:50	1	52	0	0	1		0	Occasional	172	82	27.7177	116	70	94	104	0.903846	68			19	35	48.9	5.22	91	418	2.02	5.94	1.66	3.38	60	20	3.76	149	6.04	62.3	317.76	22.59	5.24088
123	1	2015-8-13 10:04:54	1	29	1	0	1			0	175	78	25.4694	113	70	88	97	0.907216	68	0.936	1.72	44	32	46.6	5.2	80	456	1.3	3.83	0.97	2.23	78	22	1.98	148	4.93	64.3	151.72	13.23	3.0576
124	1	2015-8-13 8:58:38	1	51	1	0	0	0	0	0	165	65	23.8751	110	66	87	95	0.915789	72			37	31	47.1	6.02	102	503	1.26	4.58	1.38	2.71	92	21	4.74	164	6.69	59.2	167.27	16.36	4.37721
125	1	2015-8-13 10:48:03	2	45	1	0	1	0	0	0	167	74	26.5338	140	88	88	101	0.871287	78	0.372	1.133	48	39	45.9	4.61	54	272	3.48	4.21	1.14	1.9	70	107	1.27	158	7.53	59.2	104.4	16.28	3.33559
126	1	2015-8-13 8:35:28	1	28	0	0	0	0	0	Occasional	162	58	22.1003	116	67	75	90	0.833333	74			32	27	50.6	4.47	81	445	1.13	4.67	1.69	2.51	60	21	2.36	149	6.49	52.5	195.8	14.24	2.82901
127	1	2015-8-13 11:12:27	2	60	0	0	0	0	0	0	159	57	22.5466	115	63	77	90	0.855556	84	-0.167	1.481	22	23	44.9	5.28	64	324	2.22	5.07	1.23	2.95	83	21	5.21	136	5.29	55.2	163.36	15.34	3.59979
128	1	2015-8-13 11:15:03	1	47	1	0	1	0	Occasional	Occasional	163	67	25.2174	134	93	83	93	0.892473	66			42	27	48	4.31	111	533	3.1	4.86	1.13	2.58	65	33	2.56	172	8.93	70.5	340.14	18.39	3.52271
129	1	2015-8-13 8:17:43	1	41	0	0	1	0	11yrs,20/day	Occasional	168	70	24.8016	109	72	90	99	0.909091	72	-0.515	0.902	27	28	44.8	4.54	92	449	3.28	4.59	0.87	2.47	81	42	4.73	167	6.44	58.7	343.5	25.29	5.10296
130	1	2015-8-13 8:32:16	1	45	0	0	0	0	0	0			#DIV/0!					#DIV/0!				45	24	52	5.2	113	359	4.94	6.38	1.22	3.22	64	48	3.93	151	7.24	54.2	36.68	14.87	3.43662
131	1	2015-8-13 9:31:52	2	49	0	0	1	0	0	0	153	55	23.4952	135	80	79	88	0.897727	72			35	28	44	5.98	49	274	1.63	5.83	1.39	3.66	68	75	2.82	138	6.42	49	137.42	15.5	4.11956
132	1	2015-8-13 11:12:05	2	29	0	0	0	0	0	0	162	62	23.6244	113	60	80	98	0.816327	80			27	22	42.1	5.2	58.8	293	0.52	3.47	1.86	1.4	100	10	1.7	130	6.62	59.8	67.5	14.44	3.33724
133	1	2015-8-13 8:09:32	1	44	0	1	0	0	0	Occasional	169	76	26.6097	115	75	94	98	0.959184	60			27	25	46.1	4.7	83	437	0.73	4.44	1.86	2.27	77	20	2.26	164	6.14	49.3	322.8	14.5	3.02889
134	1	2015-8-13 9:11:15	2	31	0	0	0	0	0		160	76	29.6875	129	80	93	104	0.894231	78			17	15	49.2	5.26	56	297	2.89	4.15	1.11	2.15	85	23	4.89	127	7.28	60.1	20.33	27.57	6.44525
135	1	2015-8-13 11:15:12	1	69	0	0	0	0	0	150g/day	162	74	28.1969	139	79	96	98	0.979592	60	-1.224	0.903	37	34	44.9	4.88	81	406	1.43	3.39	1.3	1.62	68	94	3.84	123	6.04	70.1	138.1	14.43	3.12971
136	1	2015-8-13 10:41:10	1	44	0	0	0	0	25yrs，30/day	often	169	83	29.0606	141	106	98	102	0.960784	78	-0.214	1.316	60	40	48.5	5.74	103	477	1.7	4.49	0.98	2.66	49	50	2.81	177	9.03	64.8	247.83	17.4	4.43893
137	1	2015-8-13 8:37:37	1	51	0	0	1		31yrs，10/day		162	65	24.7676	120	78	81	93	0.870968	72			27	26	46.3	5.76	95.3	359	1.34	4.71	1.33	2.67	69	16	4.77	163	7.75	59.1	371.47	13.52	3.46112
138	1	2015-8-13 8:07:17	1	41	0	0	0	0					#DIV/0!	130	82			#DIV/0!				41	20	49.5	5.33	86	369	2.21	5.31	1.18	3.28	79	41	2.35	147	6.52	60.3	240	20.26	4.79937
139	1	2015-8-13 11:14:47	1	57	1	0	0	0	42yrs，20/day	32yrs，150g/day	165	70	25.7117	145	81	94	96	0.979167	72			25	26	43.5	5.93	81	359	2.21	6.13	1.3	3.92	75	36	6.61	163	7.2	70.8	149.22	12.16	3.20484
140	1	2015-8-13 9:12:53	1	67	1	0	0	0			159	63	24.9199	156	79	85	93	0.913978	72	-0.384	1.71	64	33	50.7	5.51	90.9	495	3.18	4.54	0.89	2.44	47	46	2.23	168	7.55	54.9	323.36	17.48	4.28066
141	1	2015-8-13 11:13:44	1	36		0	0	0	Occasional	Occasional	161	72	27.7767	109	70	87	98	0.887755	78			28	20	51.7	4.87	87	413	3.11	4.66	0.82	2.62	92	40	3.05	160	6.64	67	290.91	14.48	3.13412
142	1	2015-8-13 9:04:38	1	31	1	0	0	0	Occasional	Occasional	170	92	31.8339	120	73	105	106	0.990566	56			42	31	49.8	4.61	91	491	1.64	4.83	1.41	2.69	77	40	2.37	157	7.35	58	159.43	18.95	3.88264
143	1	2015-8-13 10:46:53	1	33	1	0	0	0			166	73	26.4915	125	78	92	98	0.938776	60	0.932	1.97	40	26	46.4	5	103	402	2.47	4.19	1.12	2.2	94	25	3.46	160	5.39	65.1	121.65	20.84	4.63111
144	1	2015-8-13 9:19:15	1	25	0	0	0	0	10yrs，10/day	Occasional	175	76	24.8163	104	68	85	100	0.85	62			128	69	54	4.92	73	409	2.02	4.79	1.64	2.37	87	77	12.48	162	4.46	55	379.3	24.45	5.3464
145	1	2015-8-13 9:07:30	1	52	0	0	1		0		164	66	24.539	138	90	88	95	0.926316	75	0.185	1.961	38	37	47.1	5.15	83	388	0.59	3.88	1.48	2.28	88	23	3.54	168	3.82	40.7	275.8	14.73	3.37153
146	1	2015-8-13 9:30:20	1	38	0	1	0	0	10yrs，11/day	Occasional	174	96	31.7083	134	85	103	104	0.990385	80	-2.099	-0.808	40	30	50.2	5.78	82	522	2.52	4.85	1.43	2.71	86	102	2.49	156	8.8	72.6	238.88	28.51	7.3239
147	1	2015-8-13 11:10:53	2	43	0	0	1		0		157	60	24.3418	116	60	76	90	0.844444	72	2.151	2.814	20	21	46.5	4.73	58	272	1.34	4.37	2.08	1.77	55	15	3.03	118	7.23	77.6	95.09	17.6	3.69991
148	1	2015-8-13 8:53:12	1	31	1	0	0	0	9yrs，10/day	Occasional	161	66	25.462	114	68	82	93	0.88172	78	1.028	1.948	41	27	48.9	5.48	110	287	6.22	5.37	0.91	1.73	78	26	2.7	164	8.6	56.1	383.78	12.58	3.06393
149	1	2015-8-13 8:23:12	2	35	0	0	1	0	0		162	64	24.3865	124	78	82	97	0.845361	78	1.332	1.673	15	17	49	5.36	65	370	1.15	4.42	1.22	2.61	79	9	2.58	142	7.95	63.1	59.1	18.62	4.4357
150	1	2015-8-13 8:21:10	1	30	0	0	1	0	8yrs，5/day	often	161	60	23.1473	147	95	87	93	0.935484	72			28	27	51.2	4.72	77	366	1.19	4.29	1.53	2.19	67	23	2.45	172	7.39	60.3	141.73	12.95	2.71662
151	1	2015-8-13 9:31:27	1	62	0	0	1	0	0	Occasional	163	76	28.6048	101	66	96	99	0.969697	74	-2.196	-0.193	36	31	48.5	6.5	90	508	2.96	3.26	0.61	1.48	77	30	3.71	144	7.79	57.8	289.79	14.92	4.31022
152	1	2015-8-13 8:09:09	1	37	0	0	1	0	17yrs，10/day	Occasional	163	69	25.9701	104	68	88	96	0.916667	60			42	30	50.2	4.48	76	559	2.38	5.55	1.26	3.19	68	49	2.56	150	6.68	42.6	151.72	19.01	3.7851
153	1	2015-8-13 9:23:18	1	34	1	0	1	0	21yrs，10/day	11yrs	178	86	27.143	115	75	92	107	0.859813	70	-1.714	-0.62	56	39	48.6	5.58	93	429	3	5.49	1.71	2.74	88	53	6.1	153	7.6	63.8	116.09	18.06	4.47888
154	1	2015-8-13 8:12:35	1	50	0	0	0	0	20yrs，20/day	Occasional	180	91	28.0864	110	78	99	103	0.961165	62	-0.403	1.318	39	19	45.3	4.71	105	455	1.64	4.7	0.95	2.97	92	40	4.54	169	7.97	52.8	147.52	15.4	3.22373
155	1	2015-8-13 9:02:16	1	50	0	0	1	1	20yrs	often	170	79	27.3356	140	92	95	99	0.959596	78	1.172	2.893	26	24	47.4	5.69	90	351	2.7	5.48	1.19	3.31	89	27	2.1	175	5.43	58.2	172.87	15.29	3.86667
156	1	2015-8-13 9:21:47	1	34	0	0	0	0	0	Occasional	170	75	25.9516	108	74	86	102	0.843137	66			46	29	48.5	5.23	110.5	368	1.83	4.68	0.95	2.88	82	31	2.35	161	5.37	50.2	129.25	16.94	3.93761
157	1	2015-8-13 11:15:07	1	25	0	0	0	0	0	Occasional	165	68	24.977	120	92	81	94	0.861702	78			27	20	47.5	4.9	88.7	379	1.08	3.98	1	2.37	67	53	1.4	161	8.29	61.7	355.24	20.09	4.37516
158	1	2015-8-13 11:12:22	2	54	1	0	1	0	0		160	65	25.3906	120	85	82	100	0.82	78	-0.397	0.867	61	31	48.8	6.93	64	279	1.58	5.18	1.75	2.66	37	45	2.66	147	5.16	60.8	109.62	23.36	7.19488
159	1	2015-8-13 10:10:34	1	28	0	0	1	0	0	Occasional	184	77	22.7434	112	71	87	98	0.887755	84			35	29	49.3	5.16	109	467	1.59	5.2	1.44	2.96	82	15	2.02	161	6.29	59.3	130.95	17.24	3.95371
160	1	2015-8-13 11:13:56	1	41	1	0	1	0	0	Occasional	175	78	25.4694	125	88	88	97	0.907216	70	-1.315	0.103	57	38	45.9	6.93	79.2	429	1.02	4.47	1.45	2.44	89	42	2.67	195	6.92	67.1	76.46	14.9	4.5892
161	1	2015-8-13 10:25:51	1	29	0	0	0	0	8yrs，20/day	Occasional	179	89	27.7769	130	89	95	102	0.931373	86	1.523	2.313	49	32	49.4	7.44	91	399	1.41	3.75	0.97	2.11	100	27	4.52	175	6.29	67.2	202.52	24.26	8.02197
162	1	2015-8-13 9:48:56	1	42	1	0	0	0	0	Occasional	165	76	27.9155	145	95	93	96	0.96875	76			43	26	52.9	5.43	79	375	3.33	5.66	1.25	3.16	86	48	3.5	179	6.07	66.6	222.66	16.99	4.10025
163	1	2015-8-13 9:55:21	1	41	0	0	0	0	Occasional	Occasional	169	88	30.8112	133	86	101	105	0.961905	64	-2.02	-0.602	67	40	47.1	5.85	90	486	1.22	4.86	1.28	3.02	56	54	2.16	168	5.9	49.9	157.62	11.57	3.0082
164	1	2015-8-13 8:47:24	2	25	0	0	0	0	0		154	59	24.8777	115	67	75	95	0.789474	72			40	32	50.5	5.3	68	362	2.01	5.73	1.16	3.54	65	37	2.01	136	6.76	56.2	64.48	15.06	3.54747
165	1	2015-8-13 8:50:20	1	34	0	0	1	0	0	Occasional	173	73	24.3911	137	79	85	94	0.904255	90			72	37	50.3	5.49	95.2	460	4.25	5.65	1.16	2.95	89	48	5.09	165	6.47	58.3	154.89	14.88	3.63072
166	1	2015-8-13 9:43:34	2	41	0	0	1	0	0		159	56	22.151	124	80	70	97	0.721649	72			24	27	50.6	5.04	72	316	2.22	5.24	1.6	2.84	57	11	3.03	144	5.66	56.6	147.52	11.82	2.64768
167	1	2015-8-13 10:45:43	1	43	0	0	0	0	20yrs，40/day	often	172	81	27.3797	111	66	95	105	0.904762	66	-1.876	-0.381	48	30	46.2	5.13	90	479	1.29	6.25	1.09	4.22	88	57	2.37	171	9.09	67.1	248.39	14.76	3.36528
168	1	2015-8-13 8:44:39	1	41	0	0	0	0	0	Occasional	161	77	29.7056	128	91	96	98	0.979592	72			33	23	49.2	5.47	84	533	1.63	5.74	1.19	3.73	49	38	2.45	159	7.19	56.5	346.29	24.41	5.93434
169	1	2015-8-13 8:32:40	1	37	1	0	1	0	0		171	76	25.9909	142	94	87	96	0.90625	76			31	25	50.7	5.06	85	416	5.55	5.44	0.82	2.39	74	41	3.94	152	7.73	55.2	138.55	20.2	4.54276
170	1	2015-8-13 8:25:07	1	52	0	0	0	0	0				#DIV/0!	141	92			#DIV/0!				30	20	48	7.79	103	219	2.89	6.25	1.12	3.73	81	31	4.76	170	6.26	62.5	271.89	15.47	5.35606
171	1	2015-8-13 9:50:25	1	29	0	0	0	1	0	Occasional	173	75	25.0593	130	82	85	97	0.876289	72			33	30	54	5.42	78	384	2.14	4.36	1.45	2.28	66	24	4.86	157	4.82	73.7	262.38	12.29	2.96052
172	1	2015-8-13 8:25:40	1	53	0	0	1	0	Occasional	Occasional			#DIV/0!	119	72			#DIV/0!	60			29	24	45.9	6.03	74	262	1.69	3.91	1.25	2	55	65	3.01	156	5.8	61.6	179.58	14.65	3.9262
173	1	2015-8-13 11:13:30	1	33	0	0	1	0		Occasional	162	64	24.3865	112	81	81	93	0.870968	68	0.653	1.692	23	22	47.2	5.2	88.8	409	2.17	4.63	1.4	2.4	63	29	1.6	158	5.69	56.7	331.19	18.06	4.17387
174	1	2015-8-13 10:45:53	1	28	0	0	1	0	11yrs，20/day	Occasional	167	69	24.7409	114	80	87	96	0.90625	68	-0.481	0.239	105	61	51.3	5.05	74	439	2.38	4.03	0.95	2.27	110	59	2.97	160	6.14	69.2	270.77	15.55	3.49011
175	1	2015-8-13 8:49:23	1	52	0	0	0	0	0	0			#DIV/0!	118	70			#DIV/0!				39	27	46.4		86	489	1.74	4.33	1.3	2.32	55	26	3.37	148	5.95	44.9	257.34	18.19	0
176	1	2015-8-13 8:29:51	1	55	0	0	0	0	0	Occasional	165	73	26.8136	131	77	89	98	0.908163	60			35	27	46.7	5.23	74	509	4.45	6.15	1.1	3.55	66	52	4.55	161	7.05	47.8	153.19	24.73	5.74835
177	1	2015-8-13 8:38:17	2	33	0	0	0	0	0		156	54	22.1893	106	65	71	93	0.763441	84			46	24	45.8	5.31	77	406	1.34	5.63	1.19	3.58	65	50	2.93	131	8.26	60.1	71.21	17.92	4.22912
178	1	2015-8-13 10:46:28	1	39	1	0	1		22yrs，20/day	Occasional	171	79	27.0169	128	94	94	100	0.94	76	0.913	2.248	35	35	51	5.41	93	399	2.83	4.28	1.1	2.35	79	54	4.17	160	8.69	59.3	179.58	9.76	2.34674
179	1	2015-8-13 11:13:35	1	33	0	1	0	0	7yrs，10/day	0	169	75	26.2596	116	67	90	99	0.909091	76			85	45	52.4	5.02	85.2	427	3.17	4.79	1.09	2.45	108	34	9.93	167	4.39	62.8	146.61	18.98	4.23465
180	1	2015-8-13 8:47:30	1	30	0	1	1	1	7yrs，10/day	Occasional	177	93	29.685	122	71	97	110	0.881818	70			32	21	49.3	6.01	95.9	425	1.25	4.18	1.22	2.39	125	27	5.67	159	8.01	54.4	256.22	17.4	4.64773
181	1	2015-8-13 8:27:15	1	37	0	0	0	0	0	0	171	80	27.3588	137	83	93	101	0.920792	78			112	46	47.2	5.61	84.3	397	0.55	3.47	1.4	1.73	77	53	2.06	170	9.34	81.4	33.48	22.55	5.62247
182	1	2015-8-13 10:02:12	1	27	1	0	1		7yrs，10/day	0	173	82	27.3982	137	86	92	105	0.87619	72			45	29	48.4	5.78	81.6	468	3.13	3.41	0.77	1.54	92	22	1.43	168	7.1	59.2	146.88	19.18	4.92713
183	1	2015-8-13 9:21:02	1	36	0	0	0	0	9yrs，5/day	Occasional	168	71	25.1559	108	75	88	98	0.897959	60	1.758	2.955	54	34	50.3	4.83	102	522	3.22	3.76	1.02	1.66	80	40	4.36	137	5.06	41.7	425.32	14.05	3.01607
184	1	2015-8-13 9:27:44	1	30	0	0	0	0	13yrs，3/day		163	64	24.0882	111	65	86	97	0.886598	66			26	31	43.5	5.01	86.7	404	0.92	5.09	1	3.39	72	16	6.43	161	7.68	56.2	171.65	6.77	1.50745
185	1	2015-8-13 10:11:38	1	32	1	0	0	0	10yrs，15/day	0	174	102	33.6901	149	86	105	112	0.9375	80			111	40	47.4	4.81	98	746	1.62	5.08	1.09	3.22	93	63	2.22	168	8.92	61.3	417.7	14.72	3.14681
186	1	2015-8-13 11:14:53	1	36	0	0	0	0	0	Occasional	172	72	24.3375	114	69	91	95	0.957895	60			19	20	45.6	4.85	69	404	1.6	4.7	1.12	2.78	69	14	1.27	144	5.91	54.7	397.54	6.84	1.4744
187	1	2015-8-13 9:54:41	1	27	0	0	1	0	7yrs，20/day	0			#DIV/0!	142	94			#DIV/0!	82	4.914	5.56	70	51	36.5	13.1	84	411	10.67	5.4	0.8	1.23	50	105	2.07	152	7.26	57.7	458.49	27.75	16.1567
188	1	2015-8-13 9:31:43	1	30	1	0	0	0	Occasional	Occasional	174	85	28.075	112	75	91	104	0.875	76			99	56	50.4	5.45	80	474	4.48	7.09	1.13	4.19	89	83	2.63	151	6.11	50.4	295.8	13.25	3.20944
189	1	2015-8-13 8:19:30	1	44	0	0	1	1	0	0	168	66	23.3844	106	65	85	94	0.904255	76			38	34	46.1	5.56	77	341	3.22	4.71	1.05	2.4	71	16	2.48	163	5.09	57.7	317.76	13.25	3.27422
190	1	2015-8-13 10:44:07	1	58	0	0	0	0	21yrs，20/day	Occasional	169	75	26.2596	117	76	92	99	0.929293	66	-0.562	1.359	19	21	41.6	5.1	91	350	1.58	4.34	1.25	2.52	88	13	2.83	139	5.17	65.6	350.92	14.39	3.26173
191	1	2015-8-13 9:19:45	1	24	0	0	0	0	5yrs，10/day		168	82	29.0533	143	88	94	105	0.895238	70	2.504	2.902	77	40	49.8	4.92	97	545	2.52	5.17	1.51	2.75	81	80	2.98	176	9.84	57.7	207.06	15.93	3.48336
192	1	2015-8-13 11:10:06	1	30	1	0	1	0	0	0	164	84	31.2314	129	88	100	104	0.961538	78	0.744	1.601	168	97	48.3	5.65	82	681	2.24	4.8	0.96	2.89	85	48	3	155	7.98	59.5	423.08	21.05	5.28589
193	1	2015-8-13 11:13:51	1	32	1	0	1	0	0	0	163	78	29.3575	129	82	97	98	0.989796	76			45	29	49.7	4.49	87	558	3.12	5.64	1.3	3.16	75	28	2.05	163	5.82	51	346.89	12.13	2.42061
194	1	2015-8-13 10:47:01	1	50	0	0	1	0	26yrs，20/day	Occasional	163	81	30.4867	146	97	94	100	0.94	76			56	34	48.3	5.36	90	439	1.54	5.6	0.95	3.86	67	40	3.24	179	9.41	60.5	284.59	13.27	3.16121
195	1	2015-8-13 11:15:57	1	50	1	0	1	0	Occasional	Occasional	172	79	26.7036	148	92	93	99	0.939394	68			51	39	52.8	6.22	106.2	543	1.31	4.35	1.23	2.43	60	43	4.19	155	4.64	51.9	500.62	14.72	4.06926
196	1	2015-8-13 11:15:41	1	52	0	0	0	0	31yrs，20/day	30yrs，200g/day	171	70	23.939	125	73	89	95	0.936842	70	-2.994	-1.218	32	28	46.2	5.29	86.3	295	2.12	5.66	1.68	3.29	61	169	2.83	168	7.6	62.2	315.86	10.3	2.42164
197	1	2015-8-13 9:44:57	1	42	0	0	0	0	20yrs，7/day	Occasional	163	73	27.4756	106	75	91	95	0.957895	80	0.746	2.203	79	40	45.7	5.02	87	443	2.83	3.38	0.87	1.65	62	68	1.73	153	6.9	55.1	259.05	13.49	3.00977
198	1	2015-8-13 9:16:39	1	28	1	0	0	0	0	0	172	86	29.0698	124	81	92	105	0.87619	90	-0.182	0.538	94	36	48.9	8.23	104	589	3.81	5.07	0.96	2.74	87	65	2.67	148	6.92	64.4	166.27	21.5	7.86422
199	1	2015-8-13 8:53:10	1	24	1	0	0	0	0	Occasional	174	94	31.0477	134	79	98	111	0.882883	84	-1.566	-1.168	145	59	50	5.2	102	724	1.33	4.01	1.05	2.25	75	44	6.66	155	10.38	74.4	261.74	12.39	2.86347
200	1	2015-8-14 9:10:46	1	30	0	0	0	0	5/day	Occasional	173	86	28.7347	118	68	90	106	0.849057	76	0	0	26	23	51.7	4.76	97	533	2.35	6.12	1.06	4.22	93	44	2.83	172	9.56	59.8	362.58	10.71	2.26576
201	1	2015-8-14 10:08:14	1	48	0	0	0	0	0	often	174	90	29.7265	137	89	96	100	0.96	74	0	0	46	44	48.6	5.11	148	874	1.69	3.62	1.38	1.6	61	76	6.37	151	4.78	55.5	345.1	17.64	4.00624
202	1	2015-8-14 9:39:21	1	45	0	0	1	0	0	0	176	75	24.2123	121	73	90	100	0.9	60	-2.948	-1.383	88	40	50.3	5.8	110	584	3.15	7.99	1.77	4.81	93	89	3.03	161	5.23	68.3	397.09	14.59	3.76098
203	1	2015-8-14 10:00:31	1	32	0	0	1		11yrs	Occasional	165	74	27.1809	113	83	85	98	0.867347	84	0	0	29	26	51.5	5.47	99	492	1.26	4.85	1.19	3.05	60	23	3.48	173	5.31	70.4	420.84	11.02	2.67908
204	1	2015-8-14 10:22:07	1	29	0	0	0	0	Occasional	Occasional	158	65	26.0375	108	67	81	96	0.84375	80	0	0	42	29	45.3	5.49	96	459	2.6	4.83	1.28	2.62	85	29	3.19	168	5.53	59.1	154.66	12.84	3.13296
205	1	2015-8-14 10:24:25	1	30	0	0	1	0	11yrs，10/day	0	172	81	27.3797	116	75	84	102	0.823529	74	0	0	33	24	51.4	5.49	92	385	1.7	5.39	1.32	3.25	90	23	3.39	155	9.29	60.9	298.49	13.51	3.29644
206	1	2015-8-14 9:00:56	1	47	1	0	1	0	0	0	171	74	25.3069	145	95	86	95	0.905263	72	0	0	193	92	47.2	4.86	88	453	2.17	7.95	1.37	5.42	95	156	2.36	149	7.58	62.2	258.15	16.16	3.49056
207	1	2015-8-14 10:32:57	2	55	1			0	0	0	156	61	25.0657	119	69	76	97	0.783505	96	-3.414	-2.089	17	19	44.8	5.59	68	312	1.17	4.76	1.64	2.63	111	42	3.34	140	3.85	51.7	242.46	15.93	3.95772
208	1	2015-8-14 8:30:38	1	25	0	1		0	0	0	160	73	28.5156	119	82	88	97	0.907216	72	0	0	45	34	52.9	4.75	92.3	558	3.06	5.14	0.97	2.8	75	35	3.16	168	7.77	62.8	153.73	22.62	4.77533
209	1	2015-8-14 9:17:54	1	41	0	0	0	0	0	0			#DIV/0!					#DIV/0!		0	0	34	26	45.4	6.1	96	453	2.07	5.46	1.96	2.92	66	34	3.35	178	7.29	59.9	367.51	15.89	4.30796
210	1	2015-8-14 9:19:56	1	34	1	0	0	0	8yrs，5-6/day	Occasional	178	85	26.8274	141	91	90	105	0.857143	70	0	0	28	21	44.1	4.39	77	430	2	4.2	0.95	2.45	68	28	1.35	131	7.83	48.9	9.44	11.79	2.30036
211	1	2015-8-14 9:14:43	1	43	0	0	0	0	0	Occasional	163	80	30.1103	103	73	97	96	1.01042	72	0	0	43	23	45.2	4.66	85	326	1.58	4.74	1.21	2.86	44	21	1.67	159	6.68	54.2	345.55	9.3	1.92613
212	1	2015-8-14 10:03:45	1	37	0	0	0	0	14yrs，20/day	14yrs	173	81	27.0641	126	82	90	100	0.9	72	0	0	38	26	46.7	4.94	92.9	489	2.54	5.68	1.17	3.35	79	29	1.89	161	9.17	64.7	156.75	14.08	3.09134
213	1	2015-8-14 8:49:19	1	57	0	1	1	0	Occasional	Occasional	178	87	27.4587	122	88	93	106	0.877358	66	0	0	34	23	44.9	5.52	79	416	1.67	4.33	1	2.54	119	19	5.92	145	6.33	55.8	348.68	19.49	4.78155
214	1	2015-8-14 10:16:29	1	36	0	0	1	0	10yrs，20/day	often	166	75	27.2173	106	74	84	98	0.857143	70	0	0	46	36	49.3	5.44	69	515	1.05	4.53	1.43	2.66	81	42	13.25	150	7	64.9	295.8	12.2	2.94969
215	1	2015-8-14 9:47:39	2	55	1	1	0	0	0	0	155	56	23.3091	120	71	77	90	0.855556	84	0	0	26	26	44.8	6.09	58	350	2.98	5.12	1.27	2.61	116	14	5.16	142	8.29	70.9	341.06	12.19	3.29943
216	1	2015-8-14 8:55:22	1	25	0	0	1	0	20yrs，3/day	often	173	83	27.7323	124	69	93	101	0.920792	72	0	0	141	56	48.5	4.44	102.2	647	2.21	4.83	1.1	2.76	77	55	2.85	164	9.72	59.4	335.69	24.28	4.79125
217	1	2015-8-14 8:10:11	1	44	0	0	0	0	21yrs，18/day	0	160	62	24.2188	104	73	81	89	0.910112	72	0	0	28	22	47.2	4.81	102.1	412	1.67	4.59	1.09	2.65	82	22	5.82	162	7.21	57	233.05	16.08	3.43755
218	1	2015-8-14 8:23:30	1	31	0	0	0	0	0	Occasional	169	75	26.2596	115	75	87	100	0.87	72	0	0	40	26	50.7	4.58	75	317	2.52	4.95	0.99	2.88	70	21	3.42	160	8.17	51.3	134.92	14.49	2.94952
219	1	2015-8-14 8:15:58	1	34	1		0	0	18yrs，20/day	Occasional	169	71	24.8591	109	64	86	92	0.934783	72	0	0	19	14	47	5.06	101	438	2.58	5.08	1.04	3.01	60	22	3.64	174	7.55	62.7	316.86	17.67	3.97379
220	1	2015-8-14 10:02:35	1	23	0	0	1	0	0	often	166	70	25.4028	115	75	89	100	0.89	60	0	0	32	23	46.2	4.81	85	405	1.93	4.31	0.92	2.6	61	44	2.06	160	6.14	57.7	187.34	16.95	3.62353
221	1	2015-8-14 9:33:37	1	63	0	0	0	0	0				#DIV/0!	139	80			#DIV/0!		-2.13	0.108	22	21	48.4	5.39	81	370	1.8	5.51	1.2	3.45	69	23	3.39	171	6.7	65.5	251.88	19.17	4.59228
222	1	2015-8-14 8:25:21	1	37	0	0	0	0	15yrs，20/day	0	177	87	27.7698	122	87	93	104	0.894231	74	1.515	2.759	34	21	47.7	5.3	106	521	1.76	5.59	1.02	2.84	79	24	2.96	158	7.47	55.2	339.27	17.78	4.18818
223	1	2015-8-14 8:31:05	1	27	1	0	1	0	0	Occasional	176	95	30.6689	128	69	103	108	0.953704	66	0	0	27	19	48	4.81	79	438	6.19	5.85	1.07	2.52	70	20	4.27	165	8.07	56.8	276.97	29.12	6.22521
224	1	2015-8-14 10:43:31	1	29	0	0	1	0	0	often	172	83	28.0557	118	71	91	104	0.875	72	0	0	19	19	44.9	5.77	70	407	1.93	5.85	1.23	3.57	59	40	2.77	166	7.34	64.6	328.52	22.18	5.68794
225	1	2015-8-14 9:11:42	1	64	0	0	1	1	0	0	174	70	23.1206	138	87	88	97	0.907216	70	0	0	44	28	79	6.2	89	414	1.07	3.79	1.48	1.96	59	35	4.52	158	5.18	52.3	262.18	14.8	4.07822
226	1	2015-8-14 8:20:48	1	52	1	0	1	0	0	Occasional	170	84	29.0657	140	85	102	101	1.0099	74	0	0	21	16	47.8	5.86	92	370	7.61	7.65	1.11	2.68	82	48	5.33	161	6.79	65.7	497.93	25.24	6.57362
227	1	2015-8-14 10:35:26	1	43	1	0	1	0	Occasional	0	169	87	30.4611	137	89	97	103	0.941748	76	0	0	66	38	47.3	4.64	98	313	2.1	5.61	1.16	3.45	124	30	2.72	157	11.73	64.7	353.61	27.24	5.61749
228	1	2015-8-14 10:36:57	1	41	0	0	0	0	16yrs，20/day	Occasional	169	81	28.3604	135	78	90	99	0.909091	72	0	0	24	19	46.2	6.19	78	363	3.5	3.4	0.73	1.39	60	22	2.19	151	7.92	47.3	306.55	12.86	3.53793
229	1	2015-8-14 9:04:05	1	41	1		0	0	0	Occasional	157	68	27.5873	129	94	89	94	0.946809	72	0	0	22	25	45	4.65	74	361	2.52	4.65	0.81	2.8	74	32	2.04	152	7.64	63.4	132.25	15.08	3.11653
230	1	2015-8-14 9:21:53	2	59	0	1	1	1	0	0	159	68	26.8977	137	84	90	99	0.909091	76	-1.281	0.137	25	27	45	5.09	54	330	1.51	5.12	1.3	3.12	77	36	2.34	138	5.38	40.8	304.31	19.17	4.33668
231	1	2015-8-14 8:24:47	1	51	0	0	0	0	0	Occasional	173	68	22.7204	115	79	84	96	0.875	52	0	0	17	21	45.4	5.11	108	570	1.72	4.84	1.39	2.73	77	12	3.69	161	4.52	62.6	138.75	12.24	2.77984
232	1	2015-8-14 9:24:00	1	46	1		0	0	0	Occasional	167	74	26.5338	111	68	90	97	0.927835	72	0	0	34	24	47.3	5.14	77	409	1.86	5.16	1.18	3.11	65	21	2.45	153	4.87	58.4	170.31	20.92	4.77906
233	1	2015-8-14 8:29:04	1	45	0	0	1	1	22yrs，10/day	0	162	62	23.6244	123	81	79	91	0.868132	72	0	0	29	23	43.7	5.11	77.4	393	4.01	5.01	1.04	2.23	132	18	3.9	152	7.01	59.8	248.74	9.14	2.0758
234	1	2015-8-14 8:57:08	1	42	0	0	1	0	21yrs，5/day	100g/day	160	68	26.5625	129	79	87	97	0.896907	78	0	0	45	27	46.2	5.21	94	488	3.04	4.75	1.24	2.43	79	46	2.2	165	8.11	52	258.6	12.93	2.99401
235	1	2015-8-14 10:30:06	2	34	0	0	1	0	0	0	167	73	26.1752	125	75	84	101	0.831683	72	0	0	23	23	47.3	5.88	67.7	381	2.66	5.12	1.71	2.41	59	12	1.62	149	7.28	53	280.56	14.07	3.67696
236	1	2015-8-14 8:36:58	1	39	0	0	1	0	0	Occasional	172	96	32.45	123	76	102	109	0.93578	66	0	0	28	25	50	4.9	88	411	0.93	4.48	1.33	2.57	84	21	3.29	150	5.86	50.3	149.09	11.17	2.43258
237	1	2015-8-14 8:34:07	1	35	0	1	0	0	0	0	167	80	28.6851	137	78	95	97	0.979381	70	1.041	2.187	28	20	48.4	5.77	90	541	2.13	3.41	0.78	1.75	61	23	1.85	155	8.19	51.5	328.52	13.89	3.56201
238	1	2015-8-14 8:16:23	1	50	1		1	0	33yrs，6/day	Occasional	174	73	24.1115	157	106	85	96	0.885417	76	0	0	13	60	46.6	5.3	107.7	519	3.79	6.98	1.38	3.93	79	185	4.38	179	6.22	51.3	139.68	10.22	2.40738
239	1	2015-8-14 10:17:39	1	34	0	1	0	0	Occasional	Occasional	168	69	24.4473	106	69	76	98	0.77551	72	0	0	26	21	47.1	5.5	93	511	0.78	3.43	1.23	1.82	76	36	3.71	155	4.02	48.5	348.68	10.46	2.55689
240	1	2015-8-14 8:06:37	1	54	0	1	0	0	31yrs，20/day	11yrs，50-100g/day	167	63	22.5896	124	85	77	92	0.836957	76	0	0	10	21	46.2	4.84	82	327	1.16	5.47	1.53	3.13	78	19	3.07	158	8.83	49.7	151.29	9.99	2.14896
241	1	2015-8-14 9:50:56	1	32	0	0	0	0	14yrs，15/day	Occasional	167	83	29.7608	121	79	90	105	0.857143	78	0	0	31	25	50.2	4.71	61	383	1.86	4.47	1.34	2.42	63	24	5.01	166	5.7	61.4	225.43	16.64	3.48331
242	1	2015-8-14 8:19:36	1	56	0	0	1	0	10yrs，20/day	often	169	83	29.0606	133	83	97	103	0.941748	78	-0.179	1.695	140	78	46	5.51	100	429	2.93	5.12	1	2.82	127	70	3.5	170	8.1	55.7	441.9	19.2	4.70187
243	1	2015-8-14 9:18:21	2	58	0	1	1	0	0	0	156	56	23.0112	98	57	82	89	0.921348	72	0.484	2.001	30	27	47.5	5.27	62.6	279	1.49	5.11	1.36	3.2	86	68	2.33	143	5.17	55.7	286.39	14.28	3.34469
244	1	2015-8-14 8:54:03	1	60	1		0	0	32yrs，20/day	Occasional	170	77	26.6436	149	85	86	100	0.86	84	-1.073	0.889	34	23	44.4	6.2	102	588	1.89	4.46	1.13	2.49	94	27	4.58	162	7.62	62.8	92.89	12.13	3.34249
245	1	2015-8-14 8:11:35	1	31	1	0	0	0	0	Occasional	177	90	28.7274	127	87	92	106	0.867925	68	0	0	65	36	50.3	4.73	118	538	1.72	4.35	0.95	2.45	67	38	2.2	167	6.91	58.1	323.59	14.18	2.98095
246	1	2015-8-14 10:00:03	1	36	1	0	1	0	0	Occasional	174	87	28.7356	122	85	93	104	0.894231	75	0	0	49	33	51.1	5.75	89	475	1.86	4.89	1.11	2.99	89	29	4.63	164	7.59	57.8	450.87	16.49	4.21411
247	1	2015-8-14 8:56:05	1	32	0	0	1	0	0	Occasional	162	74	28.1969	119	75	91	99	0.919192	86	0	0	41	27	48	4.88	100.8	524	3.76	7.11	1.41	4.11	66	65	5.44	153	6.84	65.8	184.65	30.09	6.52619
248	1	2015-8-14 9:37:34	1	49	1		0	0	Occasional	Occasional	170	74	25.6055	113	76	87	97	0.896907	80	0	0	75	50	81	8.25	106	343	2.41	3.33	0.97	1.56	64	43	2.49	174	6.21	56.7	315.52	16.21	5.94367
249	1	2015-8-14 8:25:00	1	41	0	0	0	0	0	Occasional	163	67	25.2174	118	86	88	97	0.907216	72	0	0	30	25	47.6	5.08	89	443	2.39	5.49	0.7	3.68	87	19	3.65	171	7.91	56.4	237.54	14.87	3.35732
250	1	2015-8-14 9:22:36	2	53	0	0	0	0	0	0	150	53	23.5556	119	74	75	89	0.842697	60	0	0	66	41	48.2	5.6	68	352	2.11	5.14	1.29	2.88	68	109	2.99	140	6.37	66.1	255.46	17.74	4.41529
251	1	2015-8-14 8:27:06	1	50	1	1	1	0	25yrs, 20/day	Occasional	173	80	26.7299	101	71	99	100	0.99	72	0	0	130	69	47.8	5.79	104	406	3.22	4.95	0.84	2.76	55	132	2.68	177	6.37	57.1	414.57	15.42	3.96808
252	1	2015-8-14 10:10:51	1	41	0	0	1	0	12yrs, 4-5/day	often	163	72	27.0993	1007	67	88	94	0.93617	52	0.11	1.308	62	42	45.2	5.18	91	522	1.59	5.19	1.2	3.06	55	59	5.66	144	6.08	61.5	322.24	9.97	2.29532
253	1	2015-8-14 9:42:56	2	51	0	0	1	0	0	0	160	64	25	99	66	83	101	0.821782	72	0	0	15	19	45.5	5.13	59	271	1.03	5.33	1.87	2.94	80	8	4.59	135	7.25	61.9	158.84	11.32	2.58096
254	1	2015-8-14 10:50:37	1	43	0	0	1	0	11yrs	Occasional	179	83	25.9043	135	86	86	100	0.86	72	0	0	14	17	47	4.89	87	440	1.09	3.23	1.5	1.33	57	14	1.75	155	5.07	53.4	150.13	11.98	2.60365
255	1	2015-8-14 9:56:14	1	35	0	0	0	0	18yrs, 20/day	Occasional	169	81	28.3604	110	69	91	105	0.866667	84	0	0	65	38	48.9	5.19	73	389	4.53	3.32	0.73	1.27	88	28	4.4	177	8.28	61.2	377.82	26.07	6.01348
256	1	2015-8-14 9:58:38	1	47	1	1	0	0	0	31yrs，200g/day	168	74	26.2188	115	73	90	98	0.918367	70	0	0	40	25	49.2	5.19	98	562	2.02	5.91	1.33	3.73	87	80	6.71	176	5.68	58.4	354.96	10.64	2.45429
257	1	2015-8-14 10:35:07	1	28	0	0	0	0	6yrs，20/day	Occasional	171	79	27.0169	130	78	84	102	0.823529	74	0	0	17	24	46.8	4.65	94	548	0.83	3.19	1.16	1.71	68	30	3.81	154	8.03	59.2	148.62	8.56	1.76907
258	1	2015-8-14 10:14:35	1	34	0	0	0	0	0	Occasional	167	76	27.2509	113	85	87	100	0.87	84	0	0	79	41	50.2	6.05	82	579	3.05	7.26	1.14	4.64	56	90	3.9	163	5.94	59.6	311.04	16.14	4.33987
259	1	2015-8-14 8:28:11	1	28	1	0	1	0	0	Occasional	164	72	26.7698	119	59	88	100	0.88	72	0	0	30	27	47.3	4.23	73	447	2.11	4.71	1.09	2.59	156	30	4.92	160	7.37	60.1	220.95	11.44	2.15072
260	1	2015-8-14 10:37:34	1	38	0	0	0	0	19yrs，8/day	often	162	77	29.34	109	69	93	95	0.978947	84	0	0	48	37	45.1	4.97	85	342	8.67	4.52	0.79	0.85	80	24	3.01	169	9.12	71.6	397.98	15.88	3.50772
261	1	2015-8-14 9:34:09	2	62	0	0	1	0	0	0	155	55	22.8928	157	83	80	88	0.909091	72	-0.256	1.526	44	32	47.5	5.86	65	367	2.17	5.15	1.16	3.12	144	206	4.66	154	5.94	59.2	181.96	11.47	2.9873
262	1	2015-8-14 8:44:37	1	43	0	0	1	0	8yrs，20/day	Occasional	162	76	28.959	123	86	96	100	0.96	60	-1.891	-0.396	40	27	45.3	5.21	79	609	1.65	4.05	0.92	2.42	65	24	4.02	165	5.44	62	251.43	18.27	4.23052
263	1	2015-8-14 8:40:32	1	41	0	0	0	0	0	Occasional	164	72	26.7698	116	75	91	100	0.91	60	1.192	2.61	34	20	47.3	4.63	86	485	1.68	5.51	1.23	3.44	46	40	2.76	153	4.34	59.6	307	6.28	1.29228
264	1	2015-8-14 10:02:07	1	41	0	0	0	0	0	Occasional	172	80	27.0416	114	77	101	98	1.03061	78	0	0	36	32	45.6	5.62	78	360	2.71	5.02	1.09	2.84	59	42	2.01	151	5.51	56.5	129.58	12.27	3.06477
265	1	2015-8-14 9:48:04	1	43	0	0	0	0	0	0			#DIV/0!	108	70			#DIV/0!		0	0	69	49	48	5.64	96	493	3.44	6.19	1.37	3.47	51	102	2.96	149	8.17	52.9	216.47	14.2	3.55947
266	1	2015-8-14 10:14:20	1	42	0	0	0	0	Occasional	Occasional	169	80	28.0102	108	65	88	100	0.88	74	-0.507	0.949	33	19	50.3	6.68	117	398	3.79	5.42	0.98	2.84	68	45	4.24	150	7.6	70.7	183.75	16.35	4.85413
267	1	2015-8-14 10:53:35	1	68	0	0	0	0	50yrs，20/day	0	158	64	25.6369	146	88	88	94	0.93617	66	0.218	2.328	18	19	44.9	4.91	75	330	1.26	4.72	1.48	2.62	85	48	5.74	160	6.19	59.6	175.24	19.34	4.22042
268	1	2015-8-14 10:39:38	1	30	0	0	1	0	0	0	174	81	26.7539	137	83	87	102	0.852941	60	0	0	35	26	45.9	5.51	90.5	316	1.41	4.02	0.95	2.35	70	42	5.48	160	6.09	51.8	282.8	18.95	4.64064
269	1	2015-8-14 9:35:50	1	43	0	0	1	1	10yrs，20/day；	Occasional	163	79	29.7339	134	92	89	104	0.855769	72	0	0	68	39	48.1	5.31	88	562	2.65	6.36	1.5	3.83	93	35	3.75	160	7.73	62.5	318.21	16.55	3.9058
270	1	2015-8-14 10:08:55	1	32	0	1	1	1	0	Occasional	168	72	25.5102	119	73	83	96	0.864583	78	0	0	41	21	49.2	5.48	107.2	494	2.5	5.7	1.21	3.43	87	59	1.96	176	8.29	53.5	191.82	22.36	5.4459
271	1	2015-8-14 10:28:08	1	47	0	0	1		30yrs,20/day	often	167	61	21.8724	121	75	80	90	0.888889	74	-1.772	0.141	10	26	45.5	7.16	70	480	2.57	5.04	1.88	2.38	55	51	7.34	161	6.77	56.7	131.78	25.49	8.11148
272	1	2015-8-14 9:52:42	1	28	0	0	0	0	10yrs，	Occasional	168	73	25.8645	145	90	84	100	0.84	84	0	0	35	29	49.4	5.24	77.6	422	1.65	5.24	1.15	3.21	91	22	1.43	154	5.51	58.1	198.21	24.14	5.62194
273	1	2015-8-14 8:13:57	1	44	1		0	0	16yrs，20-40/day	0	174	78	25.763	138	88	90	99	0.909091	72	0	0	91	61	44.4	8.36	75	242	4.03	5.22	0.91	2.38	116	73	3.46	155	6.76	49.8	174.33	16.81	6.24585
274	1	2015-8-14 8:31:39	1	45	0	0	0	0	0	Occasional	167	66	23.6652	145	102	92	94	0.978723	75	-0.757	0.809	137	77	49.7	5.95	71	447	2.79	5.83	1.57	3.26	116	76	3.22	141	7.61	68.1	352.24	19.75	5.22278
275	1	2015-8-14 8:33:56	1	59	1	0	1	0	31yrs, 20/day	Occasional	170	70	24.2215	100	58	92	96	0.958333	78	0	0	27	23	44.7	6.93	84	250	1.76	5.13	1.03	3.25	39	30	3.03	169	5.14	65.3	274.63	18.49	5.69492
276	1	2015-8-14 8:59:47	1	52	0	0	0	0	30yrs，20/day	30yrs，150g/day	171	74	25.3069	120	72	94	92	1.02174	75	0	0	19	22	45.6	5.61	88	444	4.49	5.93	1.45	2.92	92	41	3.02	154	12.3	65.5	321.19	11.55	2.8798
277	1	2015-8-14 10:35:50	1	28	0	0	1		8yrs，20/day	Occasional	173	94	31.4077	128	81	97	106	0.915094	74	0	0	185	96	56.4	5.89	86	566	3.29	5.62	0.91	3.23	78	227	3.22	178	10.16	64.4	278.21	31	8.11511
278	1	2015-8-15 8:05:11	2	57	0	0	0	0	0	0	152	60	25.9695	146	84	90	94	0.957447	72			44	33	44.8	5.98	63.9	344	2.09	5.47	1.55	3.01	93	26	3.22	140	4.64	61.2	70.31	16.69	4.43583
279	1	2015-8-15 8:06:48	1	31	0	0	1	0	12yrs，20/day	0	169	80	28.0102	113	79	67	100	0.67	62			37	28	50.2	5.87	83.8	312	2.11	3.98	0.76	2.32	81	41	2.95	150	5.55	51.3	170.75	20.03	5.2256
280	1	2015-8-15 8:08:23	1	42	0	1	1	0	20yrs，20/day	Occasional	176	84	27.1178	109	73	89	101	0.881188	60	-1.11905	0.337936	69	30	50	5.4	111	512	2.35	5.48	0.92	3.4	87	53	4.49	151	7.34	71.2	145.48	20.73	4.9752
281	1	2015-8-15 8:09:06	2	58	0	0	1	1	0	0	164	65	24.1672	134	89	78	94	0.829787	75			29	37	46.3	4.39	73	263	1.62	5.6	1.88	2.96	90	27	8.43	159	7.12	56.1	161.19	18.07	3.52566
282	1	2015-8-15 8:12:33	1	32	0	0	0	0	0	Occasional	166	70	25.4028	119	87	90	93	0.967742	76			59	39	47	4.07	66	398	1.49	4.54	1.05	2.76	94	39	1.9	169	8.62	67.7	131.51	27.5	4.97444
283	1	2015-8-15 8:13:08	2	59	1	1	1	0	0	0	156	62	25.4767	165	86	83	96	0.864583	72			38	39	48.3	4.89	52	268	2.45	6.85	1.72	4.03	91	23	4.81	134	4.87	58	157.4	20.53	4.46185
284	1	2015-8-15 8:13:37	1	27	0	0	1	0	15yrs，10/day	Occasional	186	82	23.7022	123	88	90	101	0.891089	80			93	53	48.4	5.57	76.6	516	2.29	4.58	1.17	2.62	102	75	2.85	164	7.27	56.2	144.38	17.93	4.43867
285	1	2015-8-15 8:15:00	1	35	1	0	1	0	15yrs，10/day	Occasional	171	77	26.3329	107	78	95	99	0.959596	70	-0.18303	0.963369	57	29	46.4	5.27	104.5	510	6.31	6.23	1	2.73	105	43	3.45	169	7.2	56.1	354.03	20.19	4.72895
286	1	2015-8-15 8:16:48	1	29	0	0	0	0	4yrs，10/day	0	179	85	26.5285	112	76	96	104	0.923077	72	-0.114877	0.675224	63	30	48.3	5.61	80	343	1.87	6.24	1.09	4	73	97	2.65	152	7.7	61.3	327.16	19.43	4.84455
287	1	2015-8-15 8:23:10	1	72	1	0	0	0	40yrs	Occasional	162	62	23.6244	111	60	87	90	0.966667	62	-1.01793	1.1546	21	25	45.7	7.88	73	368	1.45	4.78	0.99	2.96	99	11	3.03	144	7.2	75.2	116.71	21.96	7.69088
288	1	2015-8-15 8:23:48	1	64	1	0	1	0	44yrs，15/day	Occasional	171	85	29.0688	141	93	104	99	1.05051	76			44	36	49	7.08	75.6	268	1.62	4.31	1.18	2.45	85	18	4.37	162	5.86	57.7	75.97	26.05	8.19707
289	1	2015-8-15 8:23:54	1	33	0	0	0	0	Occasional	Occasional	156	85	34.9277	115	78	101	104	0.971154	72			100	61	50.1	5.16	89	601	2.79	5.91	1.03	3.66	68	188	4.78	160	8.4	56.6	319.4	17.66	4.05003
290	1	2015-8-15 8:25:24	2	80	1	0	0	0	0	0			#DIV/0!					#DIV/0!	88			44	38	48.6	8.98	65	426	4.52	6.11	1.46	3.28	103	96	3.58	147	7.14	60.4	177.31	21.4	8.54098
291	1	2015-8-15 8:26:22	1	30	0	0	1	0	0	Occasional	169	70	24.5089	133	85	85	95	0.894737	66	0.600437	1.45736	34	24	50	4.85	97	499	1.19	5.52	1.32	3.38	71	41	3.55	169	7.1	57.5	97.53	24.1	5.19489
292	1	2015-8-15 8:27:32	1	32	0	1	0	0	Occasional	0	190	95	26.3158	122	84	96	109	0.880734	66	1.16855	2.14958	66	33	47.3	5.21	88.4	445	1.42	5.02	1.38	2.85	84	25	2.54	172	7.8	65.2	167.16	21.75	5.03633
293	1	2015-8-15 8:28:42	1	30	0	0	1	0	11yrs，20/day	Occasional	170	68	23.5294	135	87	84	93	0.903226	72			30	32	52	4.69	88	409	4.96	7.36	1.18	4.08	78	69	2.93	176	6.61	51.9	142.47	16.79	3.49978
294	1	2015-8-15 8:29:57	2	46	1	0	1	1	0	0	151	51	22.3674	124	81	73	87	0.83908	84			26	26	43.4	4.61	60.8	414	3.34	7.58	0.92	5.12	79	69	2.77	155	9.63	62.7	92.05	20.24	4.14695
295	1	2015-8-15 8:31:46	1	37	0	0	1	0	13yrs，5/day	Occasional	171	85	29.0688	139	91	97	95	1.02105	78			56	45	52.5	4.58	79	436	3.14	6.41	1.4	6.41	75	228	7.61	181	10.33	56	229.85	16.66	3.39124
296	1	2015-8-15 8:33:32	1	53	0	0	0	0	0	Occasional	164	68	25.2826	137	88	87	96	0.90625	72	2.09271	3.89483	25	19	50.8	5.68	78	473	2	5.92	1.24	3.78	85	40	3.63	168	6.12	50.1	338.51	21.76	5.49319
297	1	2015-8-15 8:37:45	1	34	0	0	1	0	15yrs，20/day	0	154	64	26.986	105	68	84	95	0.884211	72	1.31235	2.40615	37	24	49.5	5.41	82	391	1.77	5.23	0.99	3.22	100	49	1.76	160	9.43	58.1	180.3	22.26	5.35229
298	1	2015-8-15 8:38:33	1	76	0	0	0	0	0	Occasional	158	66	26.4381	145	83	86	91	0.945055	72	0.838118	3.06676	27	29	47.4	6	90	365	1.73	6.52	1.67	4.07	86	44	3.6	181	7.15	64.7	125.34	30.58	8.15467
299	1	2015-8-15 8:40:05	1	51	0	0	0	0	0	0	161	73	28.1625	127	94	87	95	0.915789	84			55	34	42.7	6.59	82.9	355	2.75	4.43	0.8	2.6	117	34	2.55	160	6.89	61.2	155.34	18.52	5.4243
300	1	2015-8-15 8:40:43	2	37	0	0	1	0	0	0			#DIV/0!					#DIV/0!	78			17	17	48.3	5.12	57	261	1.07	4.65	1.55	2.42	73	38	7	141	7.49	63.3	52.16	23.7	5.39307
301	1	2015-8-15 8:42:44	1	43	0	0	0	0	10yrs，10/day	often	168	74	26.2188	109	78	87	99	0.878788	60	1.63412	3.12861	35	27	45.2	4.95	80.6	407	1.24	5.86	1.31	3.87	73	43	3.66	167	6.63	61.9	157.4	18.95	4.169
302	1	2015-8-15 8:45:51	1	40	1	0	0	1	0	often	167	66	23.6652	129	84	89	93	0.956989	58			64	36	51.2	7.55	77.1	313	2.83	5.48	1.28	3.19	104	21	3.95	162	7.35	52	177.31	21.53	7.22451
303	1	2015-8-15 8:46:03	2	59	0	0	1	0	0	0	155	72	29.9688	145	86	91	100	0.91	72			42	27	44.8	5.8	70.4	439	2.43	5.54	1.41	3.08	109	35	7.92	140	7.57	58.4	78.82	24.37	6.28204
304	1	2015-8-15 8:46:57	1	29	0	0	1	0	1yr，10/day	Occasional	181	84	25.6402	116	79	96	107	0.897196	78			33	25	49.3	4.88	109.7	611	1.71	5.08	1.32	3.02	61	31	3.67	165	10.49	61	194.03	21.05	4.56551
305	1	2015-8-15 8:49:52	1	40	0	0	0	0	0	Occasional	171	80	27.3588	143	92	89	96	0.927083	66			27	19	46.8	5.66	60	396	1.32	3.75	1.03	2.2	62	39	3	169	10.96	77	60.34	21.54	5.41851
306	1	2015-8-15 8:49:58	1	29	0	0	1	0	0	Occasional	177	107	34.1537	138	100	105	113	0.929204	100	0.89369	1.68379	120	72	44	6.73	83.6	623	2.6	5.37	1.08	3.13	105	120	3.31	154	8.31	48.3	280	27.38	8.18966
307	1	2015-8-15 8:57:05	1	50	0	0	1	0	0	0	162	75	28.578	115	76	94	98	0.959184	72			23	23	48	5.23	93	397	1.09	4.56	0.9	2.99	78	19	4.32	162	5.12	59.6	73.78	22.73	5.28346
308	1	2015-8-15 8:58:04	1	63	1	0	0	0	40yrs，20/day	often	164	65	24.1672	174	89	86	98	0.877551	64			46	122	49	5.46	102	364	1.9	3.21	1.25	1.31	65	49	6.28	184	8.41	56.4	35.98	20.41	4.95283
309	1	2015-8-15 9:05:18	1	28	0	0	1	0	7yrs，10/day	Occasional	165	61	22.4059	119	78	81	98	0.826531	66			25	27	47.9	5.92	98.7	507	3.16	4.23	0.69	2.25	83	32	2.08	172	6.99	56.5	248.36	20.64	5.43061
310	1	2015-8-15 9:07:30	2	50	0	0	0	0	0	0	154	59	24.8777	124	71	82	96	0.854167	76			18	23	44.5	5.65	78.5	316	2.35	8.82	1.41	6.29	110	10	3.16	151	8.17	60.2	131.92	25.15	6.31544
311	1	2015-8-15 9:08:16	1	31	0	0	1	0	0	0	165	120	44.0771	132	81	119	123	0.96748	80	-0.787194	0.133299	41	34	46.7	4.98	70.8	483	0.99	4.99	1.13	3.1	200	284	2.88	121	9.04	65.6	11.43	23.55	5.2124
312	1	2015-8-15 9:09:18	2	70	1	0	0	0	0	0	155	56	23.3091	152	81	78	91	0.857143	74	2.17351	4.50998	21	22	46.6	5.77	78	279	1.73	5.9	1.41	3.63	63	20	2.5	143	7.87	67.5	110.41	21.86	5.60588
313	1	2015-8-15 9:15:03	2	33	1	0	1	0	0	0	152	52	22.5069	107	61	76	89	0.853933	72	-0.563828	-0.28682	72	40	53.9	5.21	54	357	1.33	5.68	1.95	3.08	88	107	2.78	148	8.14	55.8	140.27	32.43	7.50935
314	1	2015-8-15 9:15:15	2	58	0	0	0	0	0	0	153	56	23.9224	104	65	75	95	0.789474	60			31	27	49	4.82	68	315	1.92	6.18	2.46	3.13	55	66	3.53	147	5.39	58.1	131.78	23.9	5.11991
315	1	2015-8-15 9:17:32	1	31	0	0	1	0	6yrs，10/day	0	172	65	21.9713	110	78	78	96	0.8125	66	1.13963	2.06013	24	19	48.4	5.72	81	396	1.25	4.2	1.39	2.19	58	18	2.44	167	4.5	53.2	98.9	20.07	5.10224
316	1	2015-8-15 9:18:16	1	63	1	0	0	1	0	0	165	80	29.3848	114	65	95	109	0.87156	72	1.6717	3.69406	35	29	47.8	4.71	98.6	369	1.02	5.19	1.4	3.04	102	44	5.6	158	15.49	81.5	157.53	26.26	5.49709
317	1	2015-8-15 9:21:16	1	39	0	1	1	0	20yrs，10/day	0	175	89	29.0612	140	87	94	100	0.94	60	0.0389468	1.37393	58	36	48.2	4.99	108.5	540	9.75	6.79	0.94	1.43	104	114	1.78	164	7.61	53.1	140.14	23.87	5.29384
318	1	2015-8-15 9:24:41	1	52	0	0	1	0	0	Occasional	172	85	28.7317	114	80	97	107	0.906542	72	-2.88819	-1.1122	64	43	42.8	6.01	82.6	484	1.49	3.92	1.17	2.1	48	45	2.23	141	5.12	58.7	186.27	22.62	6.04205
319	1	2015-8-15 9:31:34	1	30	0	0	0	0	0	Occasional	164	84	31.2314	123	89	100	105	0.952381	72			89	49	44.5	5.02	86.9	429	1.39	4.54	1	2.66	75	12	1.89	164	6.66	60.8	156.44	21.05	4.69649
320	1	2015-8-15 9:32:09	1	22	0	0	0	0	6yrs，3/day	Occasional	175	70	22.8571	122	91	86	95	0.905263	72			67	38	52.5	4.23	86	395	3.24	4.97	1.15	2.59	71	30	2.32	167	7.34	45.9	137.26	26.95	5.0666
321	1	2015-8-15 9:32:33	1	34	0	0	0	0	8yrs，10/day	Occasional	163	56	21.0772	121	75	80	91	0.879121	60			29	22	48.2	4.8	69	375	1.99	4.76	1.26	2.73	93	38	1.84	177	6.06	53.6	293.13	20.22	4.3136
322	1	2015-8-15 9:32:56	1	29	0	0	0	0	0	0	167	72	25.8166	118	84	90	99	0.909091	76			54	31	49	4.62	91.4	414	0.98	4.23	1.38	2.31	76	15	1.54	178	7.56	58.4	306.27	19.45	3.99373
323	1	2015-8-15 9:35:34	1	34	0	0	1	0	20yrs，6/day	often	181	86	26.2507	118	80	94	104	0.903846	60	1.10001	2.19381	34	33	52	4.42	89	385	1.37	3.85	1.42	1.92	70	54	2.82	160	7.04	53.9	126.44	18.84	3.70101
324	1	2015-8-15 9:35:51	1	38									#DIV/0!					#DIV/0!				60	37	45.1	5.23	91.2	368	1.79	4.83	1.03	2.96	114	39	2.47	170	5.87	49.2	235.82	19.82	4.60705
325	1	2015-8-15 9:39:29	1	48	0	0	1	0	Occasional	Occasional	167	65	23.3067	103	62	84	94	0.893617	58	0.716885	2.37896	38	28	48.3	4.92	86	283	1.02	4.7	1.57	2.62	70	25	3.26	161	8.41	53.7	131.78	20.56	4.49579
326	1	2015-8-15 9:45:10	1	58	0	1	0	0	37yrs，20/day	Occasional	155	69	28.7201	126	74	97	92	1.05435	66			23	21	45.4	5.79	72	422	2.04	5.48	1.37	3.18	64	44	4.75	158	6.12	66.8	332.54	21.75	5.597
327	1	2015-8-15 9:46:55	1	37	0	0	1	0	21yrs，10/day	Occasional	174	80	26.4236	118	80	96	101	0.950495	66	-2.30851	-1.06373	62	32	46.2	5.29	89.2	370	1.03	4.19	1.2	2.42	94	22	2.42	173	8.97	45.7	120.68	25.41	5.97417
328	1	2015-8-15 9:47:22	1	81	1	0	0	0	0	40g/day			#DIV/0!	173	73			#DIV/0!	84			19	22	44.3	7.27	98	503	1.67	4.35	1.23	2.38	70	33	3.45	173	6.69	62.5	202.39	20.84	6.73364
329	1	2015-8-15 9:48:24	1	56	0	0	0	0	0	Occasional	159	64	25.3155	123	75	84	92	0.913043	72	0.831378	2.70693	25	28	47.8	5.12	92.9	362	2.74	4.66	1.03	2.4	85	27	5.11	150	7.86	51.2	339.7	12.72	2.89451
330	1	2015-8-15 9:51:00	1	28	0	0	1	0	8yrs，10/day	0	169	70	24.5089	113	81	88	94	0.93617	72			65	31	52.1	4.97	85	544	3.42	4.04	0.91	2.03	54	78	8.25	182	6.47	66.7	319.4	21.2	4.68284
331	1	2015-8-15 9:52:32	2	52	1	0	1	0	0	0	158	54	21.6311	130	89	78	88	0.886364	78			39	31	46.1	6.15	54	317	1.37	3.67	1.06	2.09	55	13	2.54	156	5.56	61.5	71.34	22.22	6.07347
332	1	2015-8-15 9:59:01	1	60	0	0	1	0	40yrs，20/day	often	169	70	24.5089	171	89	88	96	0.916667	78			31	29	47.1	4.69	73.7	310	1.52	4.29	1.33	2.28	104	17	2.43	171	6.37	58.2	152.74	23.74	4.94847
333	1	2015-8-15 10:01:34	1	46							176	87	28.0863	135	86	90	101	0.891089				27	24	45.1	5.18	93.1	356	1.3	4.58	1.31	2.55	55	25	2.34	142	5.5	45.4	159.45	24.08	5.54375
334	1	2015-8-15 10:02:59	2	65	1	0	1	0	0	0	153	65	27.7671	139	89	86	97	0.886598	78			25	32	49.8	5.71	67	254	2.17	5.12	1.19	2.92	38	25	4.39	124	4.1	60.6	202.39	9.94	2.52255
335	1	2015-8-15 10:05:04	1	65	1	0	1	1	0	0	164	77	28.6288	141	78	98	101	0.970297	72			15	29	50.4	6.22	75	307	3.14	4.76	1.09	2.53	96	25	4.28	166	6.27	58.8	129.45	19.25	5.32156
336	1	2015-8-15 10:06:40	1	33	0	0	1	0	0	Occasional	177	78	24.8971	110	71	88	98	0.897959	66			45	30	49.7	5.35	86.4	409	1.75	4.8	1.14	2.82	69	37	1.91	155	5.29	45.7	358.81	23.24	5.52596
337	1	2015-8-15 10:08:20	1	33	0	0	1	0	0	Occasional	173	78	26.0617	132	83	87	100	0.87	60			83	44	51	5.29	86	373	0.78	3.95	1.51	1.99	69	53	4.68	157	5.96	43.4	295.52	38.57	9.06824
338	1	2015-8-15 10:08:53	1	34	0	0	0	1	0	Occasional	180	82	25.3086	109	77	88	101	0.871287	66			38	20	48.5	5.39	78	379	1.78	4.7	1.14	2.7	59	34	1.48	156	4.91	61.9	295.52	31.91	7.64422
339	1	2015-8-15 10:09:35	1	31	0	0	1	0	0	Occasional	170	73	25.2595	124	82	87	96	0.90625	72			112	47	48.3	4.9	85.6	374	0.8	4.17	1.17	2.47	70	58	2.2	168	9.13	64.9	350.45	23.94	5.2136
340	1	2015-8-15 10:13:22	1	60	1	0	0	0	45yrs，20/day	Occasional	165	80	29.3848	149	72	101	105	0.961905	64	-0.530877	1.43234	26	24	42.9	15.69	86.3	405	9.72	5.24	0.82	1.43	116	80	3.02	162	8.62	64.3	150.82	24.55	17.1195
341	1	2015-8-15 10:13:55	1	29	0	0	0	0	0	Occasional	178	65	20.5151	123	83	82	92	0.891304	84			18	18	52.1	5.18	76	455	1.33	3.23	1.22	1.55	73	12	2.19	163	9.83	53.8	145.21	22.68	5.22144
342	1	2015-8-15 10:14:54	1	28	0	0	0	0	0	Occasional	172	77	26.0276	118	83	92	99	0.929293	60			72	41	51	5.27	81	415	2.11	5.16	1.56	2.73	109	49	4.12	162	5.12	55.6	215.52	16.09	3.76864
343	1	2015-8-15 10:16:14	1	61	0	0	0	0	0	often	176	86	27.7634	156	88	96	103	0.932039	66			74	34	46	4.81	95.1	209	1.6	3.62	0.99	1.95	87	43	3.84	153	7.9	54.3	294.93	25.14	5.37437
344	1	2015-8-15 10:22:01	2	66	0	1	0	0	0	0	156	60	24.6548	124	69	83	92	0.902174	72			62	41	47.7	5.52	56	352	1.84	5.44	1.3	3.37	72	35	3.89	151	6.02	55.4	136.03	15.97	3.91797
345	1	2015-8-15 10:24:26	1	30									#DIV/0!	131	86			#DIV/0!				60	39	49.4	5.75	73	371	3.49	6.72	1.35	3.96	85	111	5.82	168	4.5	52	251.34	24.44	6.24578
346	1	2015-8-15 10:28:42	1	44	0	0	0	0	0	often	168	67	23.7387	113	79	87	94	0.925532	60	1.88815	3.41873	30	25	50.2	5.36	91	427	2.16	4.39	1.28	2.3	65	31	2.95	179	5.48	54.1	365.37	16.77	3.99499
347	1	2015-8-15 10:29:55	1	33	0	0	0	0	9yrs	Occasional	177	81	25.8546	119	80	92	104	0.884615	60	-0.05358	0.98516	19	25	50.5	4.79	92	488	2.63	3.31	0.86	1.49	66	21	4.13	151	8.1	51.9	225.07	17.53	3.73194
348	1	2015-8-15 10:30:54	1	70	0	0	0	0	0	0	160	69	26.9531	134	71	96	94	1.02128	78	-0.583909	1.55833	25	24	44	6	92.6	240	3.84	6.6	1.02	3.53	102	33	4.04	157	9.21	48.4	265.67	19.91	5.30933
349	1	2015-8-15 10:43:45	1	32	0	0	0	0	0	Occasional	169	74	25.9095	94	61	91	98	0.928571	60			82	46	52.2	4.74	87	530	3.23	7.38	1.46	4.51	66	167	2.84	160	6.47	50.1	158.9	15.92	3.35381
350	1	2015-8-17 8:09:12	1	47	1	0	1	0	27yrs，10-20/day	0	173	71	23.7228	140	87	85	94	0.904255	90			50	66	47.5	4.77	80	544	2	4.87	1.08	2.85	86	42	4.39	167	6.59	62	188.06	14.05	2.9786
351	1	2015-8-17 8:15:20	1	45	0	0	1	0	Occasional	Occasional	168	77	27.2817	135	93	94	101	0.930693	78			27	20	49.2	5.47	78	480	3.57	5.51	1.26	2.88	83	87	3.28	160	6.7	49	263.28	12.91	3.13856
352	1	2015-8-17 8:16:19	1	38	0	0	1	0	20yrs，4/day	Occasional	177	81	25.8546	116	74	92	103	0.893204	74	-1.30805	-0.0172119	21	18	52.4	6.07	75	403	3.05	5.94	1.49	3.21	58	34	4.21	150	5.2	56.2	125.48	29.2	7.87751
353	1	2015-8-17 8:16:33	2	48	0	0	1	0	0	0	162	55	20.9572	104	74	71	90	0.788889	96	-0.324798	0.591294	21	19	48.7	5	61	245	1.2	5.37	1.74	3.13	47	19	2.12	136	6.87	65.2	36.91	25.24	5.60889
354	1	2015-8-17 8:19:14	1	41	1	0	1	0	Occasional	Occasional	159	59	23.3377	120	82	81	92	0.880435	80	1.06442	2.48237	34	21	51.3	7.21	88	466.8	2.57	5.5	1.05	3.67	50	82	4.09	172	7.08	59.3	347.46	23.7	7.59453
355	1	2015-8-17 8:20:12	1	36	0	0	1	0	10yrs，20/day	Occasional	170	68	23.5294	108	67	82	94	0.87234	69	-1.79996	-0.603282	52	25	45.2	4.84	82	394	2.84	4.86	0.9	2.73	114	65	3.08	158	5.78	62.1	143.84	25.3	5.44231
356	1	2015-8-17 8:22:14	1	43							170	60	20.7612	108	67	82	94	0.87234	62			66	37	50.1	6.29	71	357	4.93	6.03	1.08	3.3	85	68	5.82	165	6.77	61.6	377.31	23.48	6.56396
357	1	2015-8-17 8:28:54	1	28	1	0	0	0	Occasional	Occasional	170	69	23.8754	117	72	80	95	0.842105	66			78	43	45.5	5.15	86.9	397	2.71	4.35	1.2	2.16	58	38	4.92	158	7	61.9	207.16	18.81	4.3054
358	1	2015-8-17 8:30:33	1	50	1	0	0	0	0	often	176	94	30.3461	129	91	106	111	0.954955	63	-2.10936	-0.38835	43	42	44.7	5.67	74	380	2.04	4.97	1.19	2.77	75	73	4.45	155	7.84	46.1	360	25.22	6.35544
359	1	2015-8-17 8:35:32	1	46	1	0	1	0	10yrs，10/day	often	165	65	23.8751	115	71	84	91	0.923077	69	-2.26087	-0.662114	76	58	50.1	6.64	81	239	2.33	3.79	0.87	1.82	79	85	2.56	142	5.5	55.8	360	14.94	4.40896
360	1	2015-8-17 8:36:03	1	61	0	0	1	0	0	Occasional	164	65	24.1672	124	63	87	89	0.977528	65	0.847375	2.83089	23	21	45.5	5.6	86	470	4.9	4.34	0.71	1.91	103	14	1.83	166	6.02	64.8	111.51	19.28	4.79858
361	1	2015-8-17 8:41:30	1	51	0	0	1	0	5yrs	often	164	72	26.7698	119	77	93	98	0.94898	84	-1.75463	-0.00565783	26	20	45.3	5.75	87	447	2.67	5.42	1	3.22	87	53	5.24	129	3.61	58.7	8.91	12.16	3.10756
362	1	2015-8-17 8:42:17	1	62	1	0	1	0	30yrs，10/day	0	153	66	28.1943	149	92	95	95	1	72	0.195368	2.19859	39	30	43.3	4.72	85	359	2.05	3.52	0.69	1.85	97	20	5.95	151	4.86	52.7	25.63	14.9	3.12569
363	1	2015-8-17 8:42:59	1	30	0	0	0	0	7yrs，7/day	0	174	93	30.7174	113	77	99	105	0.942857	67			72	32	52	4.67	72	470	3.96	5.64	1.14	2.89	77	43	3.79	154	6.17	58.3	232	17.1	3.5492
364	1	2015-8-17 8:43:59	2	31	0	1	1	0	0	0	161	68	26.2336	121	76	84	104	0.807692	84			27	23	45.3	5	62	320	0.68	4.84	1.36	3.02	71	17	1.32	138	6.85	55.9	66.86	14.26	3.16889
365	1	2015-8-17 8:49:13	2	55	1	0	1	0	0	0	148	54	24.653	132	76	83	89	0.932584	70	-2.03102	-0.705337	47	35	47.4	5.07	59	355	1.94	4.74	1.2	2.61	96	31	3.77	144	5.26	56.2	130.14	4.11	0.92612
366	1	2015-8-17 8:52:44	1	40	0	0	0	0	0	Occasional	168	83	29.4076	123	83	92	102	0.901961	62	-0.3128	1.06452	19	24	46	6.02	86	415	1.49	6.19	1.32	4.08	61	35	6.39	153	8.92	67.3	327.11	4.58	1.2254
367	1	2015-8-17 8:58:49	1	41	0	0	0	0	20yrs，10/day	often	172	74	25.0135	114	74	91	96	0.947917	78	-2.52992	-1.11197	35	23	45.9	5.35	80	419	4.51	5.68	1.1	2.91	81	126	3.55	148	5.18	55	104.62	8.79	2.09007
368	1	2015-8-17 9:13:17	2	27	0	0	0	0	0	0			#DIV/0!					#DIV/0!	72			173	112	49	5.33	49	386	1.43	4.99	1.27	2.9	136	90	1.75	134	6.21	53.6	288	15.39	3.64572
369	1	2015-8-17 9:16:18	1	26	0	0	1	0	0	0	175	77	25.1429	115	76	85	100	0.85	78			37	24	50.9	5.65	85	508	0.92	4.69	1.44	2.58	83	20	2.43	158	7.19	62.5	116.74	15.68	3.93742
370	1	2015-8-17 9:19:53	1	27	0	0	1	0	0	Occasional	175	66	21.551	108	67	79	92	0.858696	70			19	24	49.7	4.99	101	549.2	0.68	3.51	1.23	2.02	76	8	2.18	155	4.17	53.5	131.76	5.78	1.28188
371	1	2015-8-17 9:24:19	2	43	0	0	1	1	0	0	166	62	22.4996	137	80	77	95	0.810526	78	2.04478	2.70833	41	44	45.9	5.73	66	264	1.57	4.93	1.38	2.87	70	60	4.92	153	6.96	56.7	13.23	5.61	1.42868
372	1	2015-8-17 9:26:42	1	34	0	0	0	0	7yrs，10/day	Occasional	162	64	24.3865	127	77	80	91	0.879121	64	1.97707	3.07088	42	25	48.3	5.9	79	353	1.63	3.69	1.3	1.64	51	14	2.84	152	6.25	54.9	254.22	9.75	2.55667
373	1	2015-8-17 9:28:34	1	40	1	0	0	0	20yrs，20/day	0	165	68	24.977	107	67	86	97	0.886598	66	1.52896	2.90627	227	114	43.9	4.21	66	373	1.88	5.16	1.29	2.89	73	82	4.44	164	7.15	49	488	3.02	0.565076
374	1	2015-8-17 9:33:58	1	27	0	0	0	0	Occasional	often	167	77	27.6095	121	80	93	100	0.93	68	-0.796564	-0.150863	42	21	46.1	4.73	105	476	2.18	5.01	1.36	2.77	74	55	6.81	175	7.33	58.3	138.28	26.37	5.54356
375	1	2015-8-17 9:35:09	1	47	1	0	0	0	6yrs，20/day	often	163	72	27.0993	120	89	96	99	0.969697	70			47	25	46.3	6.34	97	420	5.12	4.75	1.01	2.06	88	72	2.81	185	4.4	60.3	157.83	51.35	14.4693
376	1	2015-8-17 9:35:52	1	45	0	0	0	0	0	Occasional	172	71	23.9995	108	77	87	96	0.90625	68	-2.29383	-0.728523	48	30	47.6	5.78	97	424	1.68	4.69	1.05	2.74	91	30	3.17	150	5.93	57	73.46	26.83	6.89233
377	1	2015-8-17 9:37:41	2	51	1	0	1	0	0	0	154	73	30.7809	138	88	99	105	0.942857	88	0.594044	1.67846	81	40	43.4	11.37	65	421	1.72	5.16	1.17	3.28	71	72	6.31	142	8.39	49.4	240	3.7	1.86973
378	1	2015-8-17 9:38:42	1	47	1	1	1	0	23yrs，20/day	often	169	113	39.5644	149	107	119	116	1.02586	92			57	94	43.8	5.11	92	593.2	2.18	6.1	1.38	4.08	57	113	3.9	185	7.26	56.6	无	11.96	2.71625
379	1	2015-8-17 9:46:00	1	30	0	0	0	0	Occasional	Occasional	180	68	20.9877	131	77	79	94	0.840426	69			67	63	55.6	6.07	87	387	5.56	4.93	0.89	2.02	106	60	4	160	5.73	66.4	288	32.38	8.7354
380	1	2015-8-17 9:46:55	1	46	0	1	1	0	15yrs，20/day	0	170	84	29.0657	132	85	103	101	1.0198	86			46	39	50.3	9.34	102.8	484	4.52	3.11	0.59	1.07	78	83	4.67	115	7.78	62.1	412.44	7.03	2.91823
381	1	2015-8-17 9:48:10	1	53	0	0	1	0	0	Occasional	164	68	25.2826	145	102	91	93	0.978495	68			53	29	46	5.35	79	423	3.33	5.47	1.32	2.8	96	80	4.48	167	6.19	31.1	128.69	12.49	2.96984
382	1	2015-8-17 9:48:43	1	27	0	0	0	0	3yrs，10/day	0	169	72	25.2092	117	73	84	96	0.875	68			46	24	49.7	5.02	108	472	1.16	5.18	1.14	3.25	71	58	7.58	158	7.42	63.6	147.15	8.08	1.80274
383	1	2015-8-17 9:50:33	1	69	0	0	0	0	40yrs，6/day	Occasional	160	66	25.7812	138	81	91	96	0.947917	60	-0.331326	1.79516	31	20	46.8	5.81	70	378	1.22	5.39	1.39	3.35	42	23	5.96	150	8.37	64.7	175.11	10.57	2.72941
384	1	2015-8-17 9:53:45	2	55	1	0	1	0	0	0	156	67	27.5312	123	60	100	103	0.970874	66	1.022	2.348	46	31	45	5.67	56	312	1.48	6.64	1.77	3.94	76	25	3.68	129	6.2	47.9	137.38	4.95	1.2474
385	1	2015-8-17 10:01:29	1	32	0	0	0	0	0	Occasional	160	78	30.4688	140	97	94	103	0.912621	70	0.661	1.642	28	29	45	4.86	88	577	1.1	4.4	1.11	2.47	65	37	1.35	147	8.09	54.6	131.22	20.02	4.32432
386	1	2015-8-17 10:04:44	1	49	0	0	1	0	30yrs，30/day	often	170	70	24.2215	114	80	88	96	0.916667	70	-1.149	0.543	36	30	44.4	6.33	73	468	6.31	6.07	1.42	2.45	89	132	7.32	158	6.6	54.6	142.08	3.41	0.959347
387	1	2015-8-17 10:07:23	1	53	1	0	1	0	0	20yrs	173	77	25.7276	114	68	94	99	0.949495	74			15	25	47.1	7.01	104	369	1.36	3.2	1.32	1.33	35	14	2.23	157	4.77	61.7	313.78	4.84	1.50793
388	1	2015-8-17 10:08:14	1	52	1	0	1	0	11yrs，10/day	often	159	73	28.8754	165	108	97	95	1.02105	78			23	23	49.4	6.12	84	553	3.23	5.81	1.18	3.29	66	53	10.57	151	7.08	57.5	315.56	5.08	1.38176
389	1	2015-8-17 10:08:52	1	32	0	0	0	0	0	Occasional			#DIV/0!	123	84	92	103	0.893204	68			72	37	48.5	5.76	79	495	8.35	6.06	0.91	2.31	80	142	3.43	168	8.43	58.3	264.89	26.56	6.79936
390	1	2015-8-17 10:09:07	1	28	0	0	0	0	0	Occasional	170	72	24.9135	133	89	83	98	0.846939	67			42	21	50.1	5.92	111	414	1.65	5.91	1.05	3.8	94	33	1.88	144	6.18	54.4	140.27	24.25	6.38044
391	1	2015-8-17 10:11:17	2	44							159	58	22.9421	108	61	83	94	0.882979		-0.004	0.707	42	31	44.1	6.23	59	356	2.8	3.74	1	1.82	91	23	1.79	152	7.74	69.6	220.44	19.42	5.37718
392	1	2015-8-17 10:19:05	2	45	0	0	1	0	0	0	171	71	24.281	116	75	83	101	0.821782	72			40	39	45.6	6.34	80	236	1.42	5.27	1.57	3.01	78	99	2.21	145	5.35	62.6	155.11	33.11	9.32966
393	1	2015-8-17 10:20:37	2	62	0	0	1	0	0	0	155	59	24.5578	130	70	79	90	0.877778	62	-1.735	0.048	19	29	46.4	4.79	52	260	1.06	5.38	1.91	2.83	99	18	5.55	132	4.9	55.4	61.05	12.89	2.74414
394	1	2015-8-17 10:50:18	1	24	0	0	1	0	5yrs，5/day	0	177	84	26.8122	112	71	89	101	0.881188	72			36	21	48.7	4.53	87	440	1.28	4.86	1.21	2.84	90	28	2.03	165	7.63	63	142.26	47.23	9.50897
395	1	2015-8-17 10:51:07	1	30	0	0	1	0	7yrs，20/day	Occasional	180	98	30.2469	118	75	102	106	0.962264	68	-0.329	0.528	57	24	45.9	5.42	89	361	2.07	5.77	1.04	3.58	113	84	2.61	154	10.54	55.2	380.44	28.85	6.94964
396	1	2015-8-17 10:58:05	1	32	0	0	0	0	0	Occasional	174	68	22.46	116	81	77	96	0.802083	80			26	21	50.9	5.27	72	348	1	3.86	0.99	2.19	59	21	15.89	165	5.61	58	316.44	16.63	3.89512
397	1	2015-8-17 10:58:40	1	51	0	0	0	0	30yrs，40/day	Occasional	170	74	25.6055	120	73	94	102	0.921569	70	-0.475	1.274	57	44	47.1	4.89	82	428	1.24	4.55	1.46	2.37	82	91	4.44	160	4.52	58.6	58.69	3.06	0.66504
398	1	2015-8-17 10:58:58	2	50	1	0	1	0	0	Occasional	160	73	28.5156	117	72	92	101	0.910891	70	0.551	1.578	30	29	44.6	5.52	59	377	2.37	6.4	1.34	3.99	109	34	2.85	135	5.76	57.3	348.44	4.98	1.22176
399	1	2015-8-17 11:00:59	1	33	1	0	0	0	Occasional	Occasional	181	72	21.9774	112	72	79	93	0.849462	62			128	46	51.6	4.4	86	376	1.08	3.08	1.33	1.29	99	36	2.46	154	6.29	52.3	406.22	4.14	0.8096
400	1	2015-8-17 11:02:36	1	59	1	0	0	0	20yrs，40/day，	Occasional	154	61	25.721	110	74	88	94	0.93617	70	-0.516	1.426	32	23	42.9	7.53	78	318	3.3	6.37	1.23	3.71	106	25	4.34	160	6.46	55.2	154.75	4.26	1.42568
401	1	2015-8-17 11:03:33	2	63	0	0	0	0	0	0	145	54	25.6837	129	65	79	91	0.868132	78	-1.321	0.53	21	29	47.2	5.41	59	243	1.13	5.1	1.67	2.85	69	21	2.47	122	4.21	74.6	129.95	28.66	6.89114
402	1	2015-8-17 11:04:23	1	28	0	0	1	0	0	Occasional	169	67	23.4586	114	73	81	91	0.89011	69			58	35	50.3	5.6	86	354	3.34	4.64	0.92	2.45	76	82	1.99	164	6.36	42.7	408.89	4.1	1.02044
403	1	2015-8-17 11:21:42	2	51	1	0	1	0	0	0	151	59	25.8761	111	62	83	93	0.892473	84	1.627	2.711	32	27	45.2	5.29	63	372	2.46	4.36	1.07	2.24	90	35	5.84	134	6.78	62	75.1	6.5	1.52822
404	1		1	33	0	0	0	0	10yrs，6/day	often	169	77	26.9598	121	76	94	99	0.949495	62	-1.909	-0.87	77	58	46.9	4.94	61	536	3.12	6.37	1.23	3.8	61	95	3	169	5.71	46.9	244.44	23.38	5.13321
405	1		2	46	0	0	0	0	0	0	160	63	24.6094	157	94	87	97	0.896907	82	2.885	3.696	19	20	40.8	5.95	58	308	5.49	3.68	0.74	0.91	63	7	2.3	121	10.17	71	15.52	16.4	4.33689
406	1		1	42	1	0	0	0	20yrs，20/day	Occasional	178	80	25.2493	127	86	89	95	0.936842	76	-2.245	-0.788	45	24	52.3	6.27	86	566	7.1	5.77	1.1	2.05	70	238	3.32	154	7.29	40.8	373.33	40.18	11.1968
407	1	2015-8-18 10:32:12	2	51	0	0	0	0	0	0	157	79	32.05	160	95	98	99	0.989899	60	0.654	1.738	32	28	43.8	5.22	77	359	1.39	4.75	1.02	3.05	147	36	1.73	142	7.06	63.1	140.63	12	2.784
408	1	2015-8-18 9:45:38	1	40	0	0	1	0	0	often	172	79	26.7036	125	85	90	97	0.927835	92	-1.331	0.047	62	31	49	5.28	70	479	2.07	4.7	1.42	2.43	68	51	3.54	175	5.8	43.1	326.22	26.71	6.26795
409	1	2015-8-18 8:28:48	1	42	0	0	1	0	Occasional	often	170	70	24.2215	134	91	88	97	0.907216	64			22	24	46.6	5.42	85	361	4.5	5.61	1.04	2.68	86	24	6.69	164	5.5	53.2	195.56	31.97	7.70122
410	1	2015-8-18 9:24:59	1	41	0	0	1	0	5yrs，10/day	Occasional	164	67	24.9108	113	82	91	95	0.957895	72	-1.612	-0.194	138	93	52.9	4.85	102	560	3.12	5.68	1.38	2.98	71	89	3.23	163	6.6	47.3	297.78	7.65	1.649
411	1	2015-8-18 10:24:10	2	52	0	0	0	0	0	0	161	70	27.0051	116	79	80	100	0.8	72			50	38	47.2	5.57	67	333	1.27	6.64	1.79	4.14	89	129	3.32	147	6.38	56.3	156.92	10.29	2.54735
412	1	2015-8-18 10:48:15	2	48	0	0	1	1	0	0	159	48	18.9866	98	65	72	88	0.818182	82	1.337	2.253	43	36	42.9	5.23	56.6	421	3.28	5.22	1.21	2.58	129	58	1.79	123	5.05	53.9	141	5.82	1.35283
413	1	2015-8-18 11:05:54	1	52	0	0	0	0	0	Occasional	162	64	24.3865	102	67	82	92	0.891304	60	-2.292	-0.516	32	27	46.3	5.57	103	417	1.83	4.63	1.02	2.76	93	29	6.18	159	5.89	61.4	117.83	4.2	1.03973
414	1	2015-8-18 10:58:47	1	49	0	0	0	1	0	Occasional	156	65	26.7094	158	99	81	84	0.964286	80			27	27	48.3	5.64	78	384	1.64	5.43	1.6	3	76	51	2.77	157	6.04	46.8	148.6	12.58	3.15339
415	1	2015-8-18 11:03:52	1	43	0	0	0	0	15yrs，10/day	Occasional	167	80	28.6851	138	90	95	103	0.92233	70			110	50	51.3	5.63	100	533	2.04	4.94	1.53	2.58	105	53	3.04	183	7.01	51.2	79.35	14.78	3.69828
416	1	2015-8-18 9:28:07	1	46							170	73	25.2595	117	84	88	97	0.907216		-1.955	-0.357	57	35	44.6	5.6	95	429	1.42	5.09	1.48	2.9	102	44	3.27	157	5.66	56.7	145.52	3.24	0.8064
417	1	2015-8-18 11:03:23	1	38	0	0	1	0	0	Occasional	165	70	25.7117	110	64	91	95	0.957895	70	0.442	1.733	67	41	45.7	4.29	86.8	408	2.09	4.88	0.91	3.15	169	145	2.15	162	6.42	58.9	379.56	3.68	0.701653
418	1	2015-8-18 9:59:55	1	43	1	0	0	0	0	often	167	87	31.1951	169	113	108	106	1.01887	82	-1.464	0.03	37	32	46.2	5.51	74	464	4.93	4.06	0.9	1.16	107	48	1.73	167	7.17	65.5	293.33	3.88	0.950169
419	1	2015-8-18 11:01:45	1	34	0	0	0	0	8yrs，10/day	Occasional	169	82	28.7105	119	84	91	103	0.883495	66	-0.492	0.602	90	42	49.9	5.38	91	557	2.43	5.16	0.79	3.21	87	101	2.93	154	5.27	54.2	265.78	7.48	1.78855
420	1	2015-8-18 10:59:51	1	36	1	0	1	1	0	Occasional	175	89	29.0612	140	100	96	105	0.914286	70			35	24	53.5	4.42	106.7	613	2.53	4.61	1.08	2.56	85	19	1.17	165	10.98	60.1	100.63	12.53	2.46145
421	1	2015-8-18 10:21:24	1	34	0	1	0	0	5yrs，20/day	Occasional	169	76	26.6097	135	88	89	97	0.917526	70	1.642	2.736	66	40	50.9	5.06	80	490	5.95	5.56	1.13	2.52	142	68	5.98	158	5.08	47.6	263.11	8.52	1.91605
422	1	2015-8-18 9:55:48	1	41	1	0	0	0	0	20yrs	177	101	32.2385	129	78	105	106	0.990566	80	-0.769	0.648	140	110	46.4	6.17	81.4	561	3.17	6.83	0.94	4.47	145	189	3.08	171	6.61	54.5	384	14.45	3.96251
423	1	2015-8-18 9:54:08	2	45	0	0	1	0	0	0	159	75	29.6665	129	75	92	104	0.884615	78	2.863	3.624	24	18	45	5.72	48	268	1.16	5.12	1.52	2.85	65	19	2.67	108	7.66	65.7	6.6	4.69	1.1923
424	1	2015-8-18 9:40:06	1	45									#DIV/0!	137	91			#DIV/0!		-1.155	0.411	60	35	46.2	4.85	108	535	0.96	4.36	1.43	2.38	56	67	4.77	161	7.26	73.3	257.78	22.4	4.82844
425	1	2015-8-18 11:02:04	1	31	0	0	0	0	0	Occasional	172	95	32.112	134	84	103	104	0.990385	82	1.466	2.386	49	54	48.7	5.58	83	432	2.97	6.13	1.34	3.53	83	212	2.9	153	7.4	55.8	408	4.57	1.13336
426	1	2015-8-18 9:34:34	2	54	0	0	1	0	0	0	167	78	27.968	129	86	89	101	0.881188	66			25	30	48.3	5.69	67	461	2.83	4.2	0.92	2.29	111	21	2.51	154	4.97	51.8	200.89	25.24	6.38292
427	1	2015-8-18 10:03:05	1	52	1	0	1	0	Occasional	Occasional	162	63	24.0055	136	92	86	93	0.924731	72	-0.416	1.34	28	18	45.7	12.06	70	347	3.39	4.7	1.21	2.37	82	56	3.35	169	7.48	56.9	353.78	19.86	10.645
428	1	2015-8-18 11:01:40	1	51	1	0	0	0	0	0	165	69	25.3444	123	71	84	95	0.884211	68	-2.218	-0.469	22	21	50.7	5.97	70	351	1.47	4.54	1.55	2.35	67	19	2.3	150	5.12	54.7	78.95	11.96	3.17339
429	1	2015-8-18 9:34:09	1	33	0	0	0	1	15yrs，20/day	often	177	89	28.4082	112	70	97	105	0.92381	60			38	23	46.2	5.47	85	698	2.47	5.64	1.66	3.11	68	167	4.27	155	5.19	53.4	286.22	2.61	0.63452
430	1	2015-8-18 8:38:30	1	30	0	0	1	0	0	0	188	122	34.5179	143	90	111	119	0.932773	56			40	30	49.1	4.87	76	446	3.13	6.17	1.26	3.67	132	70	2.32	160	7.59	62.6	73.01	39.46	8.5409
431	1	2015-8-18 8:45:21	1	27	0	0	1	0	0	often	182	79	23.8498	132	82	89	100	0.89	76			19	21	46.1	5.63	81.8	394	5.36	3.54	0.63	1.37	69	16	4.04	162	6.02	58.5	250.67	13.15	3.29042
432	1	2015-8-18 10:24:01	1	40	1	1	1	0	13yrs，10/day	Occasional	170	71	24.5675	106	68	92	99	0.929293	58	0.119	1.497	34	39	42.1	4.63	77	495	2.84	4.34	0.98	2.32	104	92	4	174	8.15	65.6	350.22	5.73	1.17911
433	1	2015-8-18 10:58:36	1	43	0	0	1	0	20yrs，20/day	often			#DIV/0!					#DIV/0!	65	-1.169	0.325	16	18	51.8	6.24	69	380	5.39	4.6	1.49	2.48	51	29	2.8	163	5.57	56.5	395.56	17.87	4.95595
434	1	2015-8-18 11:03:58	1	52	1	0	1	0	20yrs，20/day	Occasional	158	62	24.8358	145	93	83	92	0.902174	69	1.662	3.438	41	32	46.6	6.08	81	306	2.39	5.17	1.23	2.9	76	56	6.35	155	6.85	65	79.61	11.08	2.99406
435	1	2015-8-18 11:03:47	1	28	0	0	0	0	Occasional	Occasional	174	83	27.4145	127	83	89	104	0.855769	60			28	20	46	4.49	104	462	2.51	4.41	2.35	1.55	53	41	2.25	141	5.72	59.3	15.9	21.5	4.29044
436	1	2015-8-18 8:27:32	1	72	1	0	1	0	0	0	163	64	24.0882	133	67	91	90	1.01111	67	-1.268	0.904	22	25	45.3	9.07	109	252	1.87	5.47	1.17	3.31	67	23	3.65	156	8.35	61.3	246.22	21.38	8.61852
437	1	2015-8-18 8:47:19	1	51	0	0	1	0	31yrs，40/day	often			#DIV/0!	152	86			#DIV/0!				38	21	47.6	10.51	74	510	6.55	6.36	1.04	3.14	80	158	3.88	177	9.78	64.4	144.25	32.03	14.9616
438	1	2015-8-18 9:49:53	1	40	1	0	1	0	0	Occasional	175	90	29.3878	159	104	97	102	0.95098	80	-1.562	-0.185	164	97	53.1	5.14	92	353	2.47	6.3	1.32	3.95	98	82	4.04	167	6.27	59.1	493.33	12.26	2.80073
439	1	2015-8-18 9:15:26	1	40	0	0	0	0	0	Occasional	179	73	22.7833	117	78	85	97	0.876289	72	-0.943	0.434	31	24	47.4	6.03	71.4	356	1.16	4.49	1.38	2.53	87	14	3.3	162	4.7	49.8	297.78	30.49	8.17132
440	1	2015-8-18 10:06:48	1	33	0	0	1	0	7yrs，10/day	Occasional	166	89	32.2979	118	80	102	102	1	66			126	53	46.6	5.54	76	433	1.78	5.06	1.11	3.01	58	74	2.62	175	6.94	48	326.22	17.16	4.22517
441	1	2015-8-18 10:22:54	1	43	0	0	0	0	24yrs，20/day	Occasional	176	83	26.7949	105	72	92	98	0.938776	60	-0.825	0.669	46	31	46.8	5.37	81	528	3.38	4.3	0.96	2.14	106	26	6.16	148	6.42	65.7	108.96	9.31	2.22199
442	1	2015-8-18 9:20:24	1	64	1	0	1	0	20yrs，40/day，	0	156	65	26.7094	114	73	90	97	0.927835	62	-1.329	0.712	44	36	45	4.55	102	403	1.23	5.24	1.79	2.88	68	32	4.18	145	6.21	64.1	359.11	2.87	0.580378
443	1	2015-8-18 11:05:21	1	42	1	0	0	0	10年，40+支/天，已戒烟5+年	Occasional	166	75	27.2173	109	71	93	97	0.958763	66	-0.226	1.261	45	28	47.9	4.55	101	457	1.7	5.88	1.17	3.83	62	52	5.94	163	6.16	56.7	237.33	8.3	1.67844
444	1	2015-8-18 8:48:02	1	28	0	0	0	1	0	Occasional	170	83	28.7197	138	92	88	103	0.854369	70			20	22	49.8	4.82	105.4	695	1.95	5.49	1.24	3.32	73	30	2.73	153	7.22	60	152.04	23	4.92711
445	1	2015-8-18 8:56:00	1	46	1	0	1	0	0	Occasional	172	71	23.9995	118	84	91	100	0.91	80	0.233	1.832	32	27	46.5	5.16	84	387	1.11	4.1	1.27	2.15	61	21	3.6	154	5.03	67.1	243.56	11.79	2.70384
446	1	2015-8-18 10:20:20	1	51	1	0	1	0	Occasional	Occasional	159	69	27.2932	130	93	89	93	0.956989	64			56	32	45.7	4.38	91	398	2.64	5.97	1.28	3.51	80	90	4.48	168	6.84	62.5	278.22	15.39	2.99592
447	1	2015-8-18 8:52:13	1	37	0	0	0	0	0	Occasional	170	79	27.3356	121	87	90	100	0.9	69			86	35	48	5.58	83.5	676	2.33	4.42	0.94	2.59	71	115	6.15	175	6.52	58	382.22	11.13	2.76024
448	1	2015-8-18 10:58:56	1	62	1	0	1	1	27yrs，20/day	26yrs、100-150g/day	174	74	24.4418	107	69	91	94	0.968085	70			21	25	45.7	4.28	89.9	278	1.93	4.35	1.11	2.64	124	25	3.45	167	8.49	48.2	290.67	27.14	5.16263
449	1	2015-8-18 11:00:17	1	61	0	0	1	0	0	Occasional	163	73	27.4756	133	65	97	98	0.989796	80			21	13	45.9	6.14	81.3	439	1.29	5.09	1.05	3.29	87	50	5.13	149	4.56	54.2	156.74	9.48	2.58699
450	1	2015-8-18 11:05:40	1	45	1	1	0	0	27yrs，20/day	0	168	78	27.6361	130	79	98	100	0.98	80	-1.294	0.271	53	26	46.4	5.6	56	315	1.54	4.6	1.44	2.24	91	74	3.31	174	10.73	67.6	228.44	12.63	3.14347
451	1	2015-8-18 10:19:14	1	43	1	0	1	0	0	Occasional	159	67	26.5021	124	76	87	94	0.925532	76	-2.168	-0.674	27	25	48.7	5.65	88	458	1.15	4.36	1.49	2.24	86	80	3.68	164	6.3	64	250.38	8.44	2.11938
452	1	2015-8-18 9:43:59	2	47	0	0	1	0	0	0			#DIV/0!	118	73			#DIV/0!		1.234	2.097	19	20	45.7	6.02	52	349	1.81	6.05	1.59	3.53	60	38	4.97	145	8.02	63.5	41.13	8.52	2.27957
453	1	2015-8-18 8:15:52	1	39	0	0	1	0	20yrs，20/day	often	178	98	30.9304	137	82	102	101	1.0099	80	-0.281	1.054	96	76	45.3	9.51	80.5	397	7.56	5.87	0.92	2.44	88	79	3.35	159	6.52	60.6	361.51	7.34	3.10237
454	1	2015-8-18 9:34:47	1	35	1	0	1	0	0	Occasional	172	73	24.6755	120	86	87	95	0.915789	68	0.113	1.26	35	25	51.7	5.47	73	496	2.22	5.32	1.7	2.7	53	54	2.85	155	5.65	63.9	390.96	16.52	4.0162
455	1	2015-8-18 10:17:34	1	24	0	0	1	1	0	Occasional	163	70	26.3465	119	81	83	93	0.892473	66	-1.81	-1.412	73	42	51.9	4.75	62	489	2.21	5.04	1.23	2.81	64	84	4.26	170	6	48.3	324.69	23.69	5.00122
456	1	2015-8-18 8:54:30	1	35	0	0	1	0	0	Occasional	169	73	25.5593	111	74	86	94	0.914894	72			131	53	48.6	4.82	80	470	2.68	5.33	0.98	3.19	96	25	2.16	159	6.86	44	285.19	17.08	3.65892
457	1	2015-8-18 9:38:49	1	45									#DIV/0!	109	72			#DIV/0!				33	26	44.9	5.14	95	347	1.49	4.55	1.75	2.07	68	55	3.96	152	5.25	55.4	149.44	6.61	1.51002
458	1	2015-8-18 11:03:42	1	39	0	0	1	0	20yrs，40/day	often	177	91	29.0466	135	90	97	103	0.941748	66	-0.072	1.263	85	37	49.9	11.38	76	453	4.41	6.3	1.23	3.55	89	234	4.58	156	7.22	64.6	297.91	40.93	20.7015
459	1	2015-8-18 9:54:35	1	63	1	0	0	0	0	0	169	74	25.9095	146	79	90	92	0.978261	76	-0.507	1.515	23	23	47.3	8.26	77	320	1.69	5.04	1.24	2.9	64	20	1.68	144	7.21	64	129.85	8.75	3.21222
460	1	2015-8-18 8:59:14	1	35	0	0	0	0	0	Occasional	166	86	31.2092	125	91	95	107	0.88785	65			29	23	51.1	4.91	84	604	3.47	5.19	0.93	3.03	82	21	3.66	144	8.66	65.5	436.49	14.68	3.2035
461	1	2015-8-18 11:47:45	2	45	0	0	1	0	0	0	148	52	23.74	93	57	74	97	0.762887	78	0.189	0.919	15	23	44.3	4.64	66	271	1.74	5.09	1.84	2.48	86	7	2.97	88	5.57	70.7	4.69	10.22	2.10759
462	1	2015-8-18 11:04:48	1	30	0	1	1	0	0	0	165	64	23.5078	137	74	77	91	0.846154	68	0.016	0.873	53	40	51.5	5.4	78	434	1.11	4.78	1.98	2.35	107	28	2.13	160	5.68	58.1	137.14	10.17	2.4408
463	1	2015-8-18 8:19:25	1	28	0	0	0	0	0	0	168	67	23.7387	126	90	79	92	0.858696	68			49	26	48.9	5.47	88.2	398	4.82	3.51	0.64	1.25	71	36	2.77	160	7.13	58.8	303.93	14.53	3.5324
464	1	2015-8-18 8:40:20	1	52	1	0	1	0	0	Occasional	169	69	24.1588	141	100	89	94	0.946809	76	-1.56	0.216	37	33	46.9	5.83	79.4	528	1.38	4.34	1.04	2.56	58	32	6.94	153	6.34	52.7	24.43	11.18	2.89686
465	1	2015-8-18 11:04:12	1	36	1	0	0	0	0	0	180	82	25.3086	116	80	85	105	0.809524	92			23	18	51	5.91	87.1	333	1.41	5.59	1.16	3.62	100	19	3.12	174	7.67	51	387.62	11.52	3.02592
466	1	2015-8-18 9:20:34	1	46	0	0	1	0	20yrs，40/day	often	172	80	27.0416	126	79	90	104	0.865385	74	-0.823	0.776	24	20	50.8	7.79	85	463	6.49	4.73	1.05	1.47	57	42	3.27	157	4.59	64.8	132.79	13.33	4.61514
467	1	2015-8-18 9:23:37	1	60	0	0	0	0	0	Occasional	161	76	29.3199	172	98	102	97	1.05155	66	-1.526	0.437	39	27	44	6.7	61	348	1.71	4.5	1.26	2.47	90	31	5.74	161	5.06	62.5	47.32	7.61	2.26609
468	1	2015-8-18 10:59:56	1	49							164	76	28.257	160	84	99	93	1.06452		0.461	2.153	19	19	49.5	8.8	63	372	1.5	3.49	1.18	1.77	90	40	2.94	144	8.46	59.4	70.86	13.13	5.13529
469	1	2015-8-18 9:10:41	1	48	1	0	1	1	0	Occasional	174	87	28.7356	129	98	97	108	0.898148	70	-2.032	-0.37	66	41	45.7	8.88	62.1	466	2.94	4.68	0.85	2.65	61	25	2.3	149	5.11	56.5	126.04	24.88	9.81931
470	1	2015-8-18 10:59:03	1	57	0	1	1	0	0	Occasional	175	75	24.4898	124	88	88	95	0.926316	76			37	30	45.6	5.23	86	399	2.92	6.61	1.25	3.91	61	64	14.44	163	6.77	55.7	538.24	11.37	2.64289
471	1	2015-8-18 9:07:11	2	45	1	0	1	0	0	0	162	64	24.3865	152	93	77	102	0.754902	88	2.193	2.944	25	27	48.1	5.78	68	340	1.5	4.72	1.45	2.49	80	14	2.41	156	7.11	74.7	38.96	14.15	3.63498
472	1	2015-8-18 11:00:01	1	46	0	0	0	0	Occasional	Occasional	170	89	30.7958	115	71	95	106	0.896226	72	0.167	1.766	34	26	45.7	5.17	98	339	0.72	4.27	1.27	2.49	58	15	2.15	170	6.78	57.8	138.56	7.84	1.80146
473	1	2015-8-18 8:39:52	2	65	1	0	0	0	0	0	152	57	24.6711	137	86	91	95	0.957895	68	0.435	2.424	22	23	44	6.33	64	285	1.14	3.89	1.17	2.15	58	15	2.81	120	5.18	61.4	126.37	10.54	2.96525
474	1	2015-8-18 10:15:39	1	42	0	0	0	1	10yrs，20/day	10yrs	166	71	25.7657	120	88	94	95	0.989474	68	-1.716	-0.259	42	32	48.4	5.05	84	563	2.7	4.69	1.05	2.5	66	50	3.65	164	7.92	56.4	330.71	16.54	3.71231
475	1	2015-8-18 10:59:44	1	42	0	0	1	0	0	Occasional	178	75	23.6713	109	73	87	98	0.887755	100	0.4	1.857	25	19	47.9	5.29	105	472	0.96	4.63	1.41	2.58	77	20	4.92	145	6.4	77.3	159.46	10.55	2.48042
476	1	2015-8-18 9:08:08	1	62	1	0	0	0	0	Occasional			#DIV/0!	130	84			#DIV/0!	62			23	23	46.4	4.94	78	417	1.88	5.58	1.11	3.4	102	20	6.27	170	6.07	59.8	135.62	11.09	2.43487
477	1	2015-8-18 11:00:07	1	47	1	0	1	1	0	often	170	83	28.7197	108	68	90	100	0.9	64	-0.221	1.41	29	23	50	6.4	79	342	2.82	4.82	1.3	2.49	82	44	1.95	153	4.97	58.4	192.8	13	3.69778
478	1	2015-8-18 11:03:05	1	42	0	0	0	1	20yrs，20/day	Occasional	162	74	28.1969	112	67	93	98	0.94898	65	2.637	4.094	52	46	47.5	6.97	78	383	5.97	4.84	0.97	1.68	94	87	2.99	158	7.34	75.6	310.63	10.37	3.2124
479	1	2015-8-18 9:29:35	1	41	0	0	0	0	20yrs，10/day	often	162	70	26.6728	114	77	91	95	0.957895	60	-0.853	0.565	46	30	50.6	5.17	66	378	3.17	5.76	1.19	3.29	72	78	10.85	155	5.85	52.7	149.12	10.23	2.35063
480	1	2015-8-18 9:00:25	1	38	0	0	0	0	15yrs，20/day	Occasional	173	91	30.4053	129	93	94	104	0.903846	84	-0.313	0.978	42	24	48.2	4.53	97	393	3.16	5.4	0.88	3.1	95	22	11.9	166	8.52	52.5	234.98	15.23	3.06631
481	1	2015-8-18 11:06:18	2	39	0	0	0	0	0	0	158	63	25.2363	119	78	82	98	0.836735	72	-0.405	0.084	69	51	47.1	5.07	67	389	1.76	5.41	1.28	3.2	124	185	2.04	142	6	58.6	70.89	11.73	2.64316
482	1	2015-8-18 9:50:27	1	33	1	0	1	0	0	Occasional	162	90	34.2936	141	92	100	103	0.970874	88			19	26	45.1	5.77	85.6	512	10.57	6.26	0.87	2.28	109	63	4.91	172	7.7	57.1	84.24	34.29	8.79348
483	1	2015-8-18 9:15:39	1	76	0	0	0	0	0	0	168	75	26.5731	139	71	90	100	0.9	62	-0.652	1.577	24	27	45.3	6.07	88	416	4.35	6.01	1.12	2.96	58	30	2.79	171	6.9	53.8	134.97	14.07	3.79577
484	1	2015-8-18 8:34:31	2	74	0	0	0	0	0	0	153	66	28.1943	167	87	99	100	0.99	84	-1.012	1.603	29	26	48.9	5.66	60	307	1.86	4.48	1.81	2.01	98	21	7.43	145	9	62.3	129.31	18.93	4.76195
485	1	2015-8-18 8:49:26	1	55	1	0	1	0	0	Occasional	166	63	22.8625	116	68	79	91	0.868132	66	-0.456	1.396	38	27	50	5.02	81	519	2.98	5.81	1.32	3.35	70	45	2.13	147	6.61	45.6	257.74	11.01	2.45645
486	1	2015-8-18 8:25:10	1	45	0	0	0	0	20yrs，15/day	Occasional	173	79	26.3958	117	84	90	96	0.9375	76	0.117	1.683	27	19	48.4	5.91	65.7	360	2.95	5.14	0.88	2.97	118	69	2.82	145	12.76	63	126.15	10.46	2.74749
487	1	2015-8-18 9:23:12	2	34	0	0	1	0	0	Occasional	160	57	22.2656	127	82	77	92	0.836957	72			22	18	43.9	4.82	64	390	2.49	5.81	1.2	3.4	49	23	2.65	146	5.29	61	148.35	10.64	2.27932
488	1	2015-8-18 8:17:24	1	28	0	0	0	0	10yrs，10/day	Occasional	172	74	25.0135	114	69	86	94	0.914894	72	-0.28	0.44084	84	41	48.2	4.82	84	505	1.82	5.27	0.96	3.11	129	88	2.98	155	13.29	62.9	222.93	10.25	2.19578
489	1	2015-8-18 10:14:58	1	52	1	0	0	0	30yrs，20/day	Occasional	165	66	24.2424	119	77	83	96	0.864583	66	-1.998	-0.222	46	41	46.2	5.51	79	486	1.01	4.52	1.58	2.42	93	58	3.79	160	7.41	45.3	275.82	17.72	4.33943
490	1	2015-8-18 10:58:03	1	52	0	0	0	0	0	0	168	84	29.7619	165	99	98	103	0.951456				23	21	47.5	5.07	72	439	2.08	5.37	1.5	2.94	84	45	3.03	154	6.29	56.4	156.52	9.45	2.1294
491	1	2015-8-18 11:04:20	1	33	0	0	1	0	11yrs，20/day	Occasional	177	91	29.0466	112	78	100	111	0.900901	68	-0.778	0.261	32	34	51.9	5.2	98	471	2.37	5.08	1.49	2.64	90	54	6.49	166	6.88	66.5	89.36	11.69	2.70169
492	1	2015-8-19 8:07:34	2	51	0	0	0	0	0	0	166	70	25.4028	136	96	88	96	0.916667	82			19	20	48	5.77	44	228	0.63	3.99	1.81	1.79	67	14	1.69	138	5.03	58.2	38.26	11.49	2.94655
493	1	2015-8-19 8:12:21	1	44	1	0	1	0	0	Occasional	170	78	26.9896	162	109	90	100	0.9	90			43	32	46.6	5.13	98	337	1.15	5.69	1.39	3.49	101	47	3.09	148	4.78	47.5	149.99	13.26	3.02328
494	1	2015-8-19 8:14:15	1	42	1	0	0	0	21yrs，20/day	Occasional	171	85	29.0688	122	74	94	103	0.912621	76			56	27	46.7	6.56	89	425	2.7	5.48	0.99	3.32	76	46	4.49	159	7.92	57.3	329.37	17.01	4.95936
495	1	2015-8-19 8:16:42	1	35	1	0	0	0	11yrs，20/day	often	176	85	27.4406	115	83	89	100	0.89	74			59	29	51.6	4.97	77	482	1.53	5.19	1.41	3.11	69	41	3.18	160	5.88	41	269.12	15.32	3.38402
496	1	2015-8-19 8:18:06	1	34	0	0	0	0	0	Occasional	167	95	34.0636	128	88	96	111	0.864865	72			117	99	50.5	5.6	64	385	1.27	5.2	1.25	3.16	116	96	5.68	151	7.26	63.4	324.02	47.53	11.8297
497	1	2015-8-19 8:20:17	1	51	0	0	1	0	30yrs，20/day	Occasional	168	74	26.2188	118	69	83	96	0.864583	66	-0.279	1.47	40	27	49.6	5.1	92	370	4.2	6.32	1.12	3.41	62	70	3.33	159	7.51	67.2	157.17	7.92	1.7952
498	1	2015-8-19 8:22:08	1	49	1	0	1	0	31yrs，20/day	often			#DIV/0!					#DIV/0!	78	-0.229	1.463	43	36	52.8	7.24	92	518	3.46	2.49	0.97	0.5	54	69	2.31	154	6.26	47.4	261.09	11.37	3.65861
499	1	2015-8-19 8:23:25	2	65	0	0	0	0	0	0	150	68	30.2222	107	63	94	104	0.903846	66	-1.564	0.424	19	20	43.1	5.08	57	297	0.93	5.4	2.17	2.78	129	8	2.17	126	5.76	69.2	78.05	7.3	1.64818
500	1	2015-8-19 8:24:48	1	50	1	0	1	0	0	0	164	77	28.6288	112	80	90	98	0.918367	80	-1.728	-0.007	36	29	45.9	6.34	114	568	1.72	4.91	1.15	2.96	78	36	2.33	155	7.87	55.5	151.29	17.48	4.92548
501	1	2015-8-19 8:26:47	1	52	0	0	1	0	0	0	165	75	27.5482	120	71	94	95	0.989474	76	-1.286	0.49	57	40	45.8	5.52	66	510	0.95	4.25	1.63	2.3	64	52	2.76	156	5.84	72.9	230.29	16.51	4.05045
502	1	2015-8-19 8:29:49	1	46	0	0	1	1	0	7yrs,100g/day	176	69	22.2753	123	72	83	96	0.864583	72	-1.738	-0.139	22	20	49.4	4.96	87	251	1.62	5.31	2.06	2.52	82	12	2.91	164	6.16	46.3	57.51	7.08	1.56075
503	1	2015-8-19 8:29:57	1	56	1	0	1	0	31yrs	often	167	73	26.1752	162	83	90	97	0.927835	78	-0.493	1.383	22	21	47.3	5.24	80	399	2.9	4.6	1.26	2.21	63	32	4.57	145	5.69	59	143.67	6.47	1.50679
504	1	2015-8-19 8:32:27	1	38	0	0	1	0	20yrs，20/day	Occasional	167	73	26.1752	109	70	89	96	0.927083	72	-1.223	0.068	43	33	51.6	5.09	83	459	2.17	5.81	1.21	3.48	57	30	3.25	158	9.39	65.7	153.36	11.07	2.50428
505	1	2015-8-19 8:34:50	1	54	0	0	1	0	0	0	175	75	24.4898	119	78	84	97	0.865979	60	0.703	2.53	45	26	47.7	5.91	96	416	1.14	4.15	1.19	2.32	72	18	2.86	164	6.57	69	279.16	7.53	1.97788
506	1	2015-8-19 8:37:22	1	36	0	0	0	0	Occasional	Occasional	164	76	28.257	102	64	92	97	0.948454	76	1.113	2.31	94	51	47.1	4.61	79	405	4.98	3.98	0.69	1.66	66	89	5.79	167	8.45	61.7	152.05	12.97	2.65741
507	1	2015-8-19 8:37:26	1	72	1	0	0	0	0	Occasional	167	88	31.5537	166	86	110	104	1.05769	68	-1.04	1.133	30	32	50.1	6.43	104	408	2.21	4.77	1.02	2.84	77	37	2.78	169	6.73	60.7	147.92	17.35	4.95824
508	1	2015-8-19 8:37:56	2	39	0	0	0	0	0	0	156	65	26.7094	103	66	83	93	0.892473	68	2.02	2.509	12	16	45.1	5	54	408	2.48	4.83	1.22	2.67	64	15	3.77	142	6.19	60.5	78.05	13.56	3.01333
509	1	2015-8-19 8:42:26	1	48	0	0	0	0	0	Occasional	170	81	28.0277	111	72	98	102	0.960784	78			62	38	46.4	5.67	85	450	2.92	6.08	1.16	3.7	71	52	7.56	165	5.96	64.6	135.51	9.83	2.47716
510	1	2015-8-19 8:43:15	1	51	1	0	1	0	42yrs，20/day	42yrs，100g/day	166	71	25.7657	131	85	92	92	1	76	1.921	3.67	28	23	46.3	7.85	74	340	2	4.93	1.27	2.65	97	95	4.44	152	6.61	64	361.51	11.78	4.10991
511	1	2015-8-19 8:44:21	2	38	1	0	1	0	0	0	161	62	23.9188	108	70	81	97	0.835052	72			14	14	47.2	5.21	58	355	1.56	4.72	1.29	2.67	56	17	1.99	132	4.05	52.2	33.01	11.63	2.69299
512	1	2015-8-19 8:47:25	1	46	0	0	1	1	0	Occasional	168	66	23.3844	117	79	84	96	0.875	72	1.128	2.727	23	21	48.8	5.08	67	372	2.48	6.01	1.33	3.76	81	27	5.47	164	6.45	58.8	128.65	10.68	2.41131
513	1	2015-8-19 8:51:01	1	52	0	0	0	0	0	Occasional	169	74	25.9095	129	88	92	97	0.948454	80	-1.84	-0.064	25	24	46.9	5.47	89	382	1.7	6.08	1.27	3.92	93	47	3.55	167	9.27	55.4	307.95	10.63	2.58427
514	1	2015-8-19 8:52:03	1	36	0	0	0	0	Occasional	Occasional	166	70	25.4028	103	68	83	95	0.873684	70			9	19	49.3	5.31	81	480	5.11	6.54	1.05	3.45	56	38	3.96	162	5.88	58.4	160.67	10.8	2.5488
515	1	2015-8-19 8:55:24	2	49	0	0	1	0	0	0	155	49	20.3954	93	52	70	87	0.804598	70	3.403	4.374	39	29	47	5.64	66	307	1.84	5.83	1.75	3.47	62	42	2.15	144	6.28	62.2	247.7	14.04	3.51936
516	1	2015-8-19 8:56:12	1	24	0	0	0	0	4yrs，20/day	0	178	90	28.4055	112	75	89	112	0.794643	60			55	36	50.1	5.2	85	520	1.67	5.11	1.19	3.22	75	27	2.04	153	7.53	55.8	126.15	9.23	2.13316
517	1	2015-8-19 8:59:41	2	61	1	0	0	0	0	0	149	53	23.8728	119	70	78	89	0.876404	60	-0.898	0.818	20	20	46	4.99	50	178	1.54	4.53	1.26	2.55	94	13	2.62	135	5.31	57.9	98.07	10.06	2.23108
518	1	2015-8-19 9:00:33	1	29	1	0	1	0	11yrs，10/day	0	174	81	26.7539	108	76	87	97	0.896907	70	0.857	1.647	58	28	49.9	5.32	86	490	2.82	5.73	1.06	3.38	81	35	2.88	167	6.23	57	156.3	18.93	4.47589
519	1	2015-8-19 9:01:26	1	60	0	0	1	0	40yrs，15/day	Occasional	173	86	28.7347	124	71	90	100	0.9	60	-0.203	1.761	14	16	45.4	5.01	81	378	3.06	4.31	1.09	1.76	82	16	1.17	145	8.54	48.2	98.94	8.19	1.82364
520	1	2015-8-19 9:03:35	1	67	0	0	0	1	0	0	162	71	27.0538	112	73	92	96	0.958333	72	2.109	4.203	30	22	51.3	6.11	88	434	2.8	5.24	1.13	3.06	70	53	5.53	155	5.21	55.8	151.62	12.54	3.40531
521	1	2015-8-19 9:04:45	2	29	0	0	1	0	0	0	159	65	25.711	99	70	87	97	0.896907	72	-0.361	-0.193	19	17	48.6	5.66	58	348	1.81	5.81	1.39	3.49	77	19	2.46	146	7.65	57.4	144.33	17.22	4.33179
522	1	2015-8-19 9:06:15	1	29	0	1	0	0	0	Occasional	176	85	27.4406	107	78	89	108	0.824074	84			25	22	50.3	5.03	83	367	1.5	5.19	1.35	3.08	68	14	3.21	165	9.7	56	96.33	10.25	2.29144
523	1	2015-8-19 9:10:18	1	42	0	0	1	0	0	Occasional	164	70	26.0262	108	66	82	94	0.87234	60			69	38	51.3	5.44	88	444	2.66	5.79	1.16	3.57	60	196	3.25	159	6.22	48.2	274.48	6.84	1.65376
524	1	2015-8-19 9:11:37	2	60	1	0	1	0	0	0	163	79	29.7339	146	89	94	103	0.912621	84			30	21	46.9	12.15	51	349.5	6.47	4.61	0.82	1.22	103	33	4.72	147	7.57	61.9	90.56	18.36	9.9144
525	1	2015-8-19 9:17:57	2	55	1	0	0	1	0	0	163	65	24.4646	120	88	81	102	0.794118	78			26	28	48.6	6	75	324	1.75	5.11	1.5	2.92	62	21	2.44	149	7.99	48.1	227.62	12.85	3.42667
526	1	2015-8-19 9:23:38	1	50	1	0	1	1	0	often	176	81	26.1493	123	76	91	100	0.91	72	-2.201	-0.48	51	35	47.7	5.43	84	431	2.57	4.89	1.25	2.65	88	80	3.81	137	3.77	46.1	391.63	8.35	2.01513
527	1	2015-8-19 9:27:00	1	47									#DIV/0!					#DIV/0!				56	43	50.4	5.53	86	480	2.62	6.35	1.45	3.95	80	96	2.95	156	5.06	57.7	149.55	7.09	1.74256
528	1	2015-8-19 9:29:00	1	49	1	0	0	0	31yrs，20-40/day	Occasional	173	75	25.0593	148	94	93	100	0.93	78			78	47	45.9	7.98	62.6	270	2.75	3.69	0.92	1.62	96	369	5.72	150	6.73	55.8	176.07	13.18	4.67451
529	1	2015-8-19 9:29:22	1	43	1	0	1	0	Occasional	Occasional	169	96	33.6123	138	88	103	109	0.944954	76	-1.842	-0.347	23	23	50	5.87	89	412	3.13	4.12	1.28	1.85	84	22	3.02	159	6.58	49.1	147.16	10.28	2.68194
530	1	2015-8-19 9:29:56	2	61	0	0	0	0	0	0	156	65	26.7094	99	60	82	98	0.836735	70	1.574	3.29	21	24	44.8	5.75	77	389	1.16	4.18	1.24	2.22	69	31	2.29	157	5.24	46.9	96.76	12.36	3.15867
531	1	2015-8-19 9:31:50	1	35									#DIV/0!	123	87			#DIV/0!				29	21	47.1	5.74	81	354	1.08	4.76	1.23	2.89	76	20	4.35	176	6.15	56.1	290.54	8.69	2.21692
532	1	2015-8-19 9:37:00	1	30	0	0	0	0	12yrs，20/day	often	188	88	24.8981	110	77	85	103	0.825243	80			22	20	51.7	5.58	80	432	2.68	6.48	1.36	4.12	90	46	2.94	181	11.34	60.3	239	8.41	2.08568
533	1	2015-8-19 9:38:57	1	52	1	0	1	0	21yrs，10/day	20yrs, 50-100g/day	159	72	28.4799	122	79	92	96	0.958333	78	-2.47	-0.694	46	32	45.7	6.23	75	433	1.92	5.94	1.22	3.66	99	117	5.22	161	7.29	69.4	236.99	10.31	2.85472
534	1	2015-8-19 9:40:25	1	46	1	0	1	0	0	Occasional	157	73	29.6158	112	73	97	97	1	76	1.238	2.837	33	29	43.5	6.09	83	469	1.53	4.75	1.33	2.71	64	72	2.92	162	5.44	67.6	386.28	11.15	3.01793
535	1	2015-8-19 9:41:40	2	47	0	0	1	0	0	0	160	63	24.6094	118	63	88	96	0.916667	80	1.167	2.029	56	49	46.5	4.42	57	383	0.53	3.66	1.88	1.61	61	46	2.56	134	5.06	65.8	26.77	8.02	1.57548
536	1	2015-8-19 9:41:48	2	35	0	0	1	0	0	0	158	83	33.2479	131	77	101	107	0.943925	76			173	72	49.7	5.11	49	384	1.3	5.74	1.48	3.45	70	64	2.43	134	6.36	54.4	136.27	35.18	7.98977
537	1	2015-8-19 9:47:11	1	27	0	0	1	0	0	Occasional	165	90	33.0579	117	83	96	110	0.872727	84			37	28	49.3	5.9	90	389	2.37	5.24	0.97	3.1	78	24	1.64	172	6.15	44.7	156.08	16.01	4.19818
538	1	2015-8-19 9:48:31	1	32	0	1	0	0	0	Occasional	170	80	27.6817	122	86	89	99	0.89899	66			44	25	48.3	5.23	63	397	2.46	4.81	0.74	2.98	67	74	5.15	151	6.21	51.2	132.79	16.72	3.88647
539	1	2015-8-19 9:53:44	1	51	1	0	1	0	16yrs，10/day	0	160	72	28.125	133	91	90	97	0.927835	58			65	40	48.8	4.8	83	384	2.19	4.85	1.22	2.73	57	17	4.94	159	6.35	58.4	151.84	18.15	3.872
540	1	2015-8-19 9:54:11	2	52	1	0	0	0	0	Occasional	152	62	26.8352	110	69	90	99	0.909091	84	-0.546	0.597	33	25	42	5.67	38	453	1.96	3.65	1.44	1.54	100	33	2.84	144	5.32	55.6	352.13	35.56	8.96112
541	1	2015-8-19 10:00:44	2	56	0	0	1	0	0	0	153	54	23.0681	119	63	75	90	0.833333	60	-1.514	-0.126	10	19	48.9	6.12	57	343	1.81	5.68	1.43	3.38	62	13	2.76	134	8.06	74.9	145.78	15.21	4.13712
542	1	2015-8-19 10:05:34	1	32	0	0	0	0	11yrs，20/day	Occasional	173	74	24.7252	105	72	82	94	0.87234	76			30	27	49.7	4.65	111	482	3.77	5.04	1.02	2.51	56	38	5.62	157	5.53	48.2	146.6	9.81	2.0274
543	1	2015-8-19 10:06:43	1	59	0	0	0	0	0	often	169	71	24.8591	128	87	95	101	0.940594	72	0.409	2.351	24	26	44.1	5.35	70	471	1.31	5.14	2.22	2.32	72	51	2.66	158	6	62	204.42	3.53	0.839356
544	1	2015-8-19 10:07:30	1	23	0	0	0	0	0	0	174	86	28.4053	128	73	89	103	0.864078	70	-0.257	0.048	39	32	54.6	4.8	66	469	1.32	5.07	1.46	2.88	82	21	2.77	165	7.73	62.5	260.62	16.94	3.61387
545	1	2015-8-19 10:10:19	1	44	1	0	1	0	0	often	166	87	31.5721	131	85	98	105	0.933333	76			33	32	46.3	7.56	62	432	1.54	3.62	1.53	1.55	85	113	4.04	143	5.87	61.2	369.86	16.21	5.44656
546	1	2015-8-19 10:17:17	1	44	1	0	1	0	20yrs，20/day	Occasional	174	79	26.0933	116	83	89	100	0.89	66			24	21	46.9	5.32	80	518	2.02	5.03	1.41	2.83	25	41	5.14	149	6.63	53.6	170.42	11.11	2.6269
547	1	2015-8-19 10:17:21	1	47	1	1	0	0	1yr，40/day	often	163	80	30.1103	114	68	96	101	0.950495	60	0.862	2.493	35	25	50.6	5.62	112	537	3.23	5.63	1.35	3.07	69	83	6.07	161	5.58	64.5	229.8	9.7	2.42284
548	1	2015-8-19 10:19:29	1	51	0	0	1	0	21yrs，40/day	Occasional	171	75	25.6489	107	73	86	98	0.877551	66	-0.783	0.966	60	39	44.9	5.62	83	318	1.25	5.57	1.24	3.59	77	34	2.82	158	10.01	65.9	182.21	23.57	5.88726
549	1	2015-8-19 10:23:49	1	36	0	0	0	0	0	Occasional	173	98	32.7442	125	91	98	105	0.933333	72			36	26	45.5	4.93	89.1	386	5.45	5.15	0.78	1.66	56	14	2.4	169	5.68	57.5	271.05	22.47	4.92343
550	1	2015-8-19 10:26:16	2	45	1	0	0	0	0	0	155	63	26.2227	111	77	83	95	0.873684	66	1.047	1.807	25	23	45	5.37	70	369	1.75	5.2	1.31	3.16	68	13	3.83	98	8.92	64.4	5.28	21.92	5.23157
551	1	2015-8-19 10:34:13	1	47	0	0	0	1	30yrs，20/day	0	166	71	25.7657	106	71	90	94	0.957447	72	-1.942	-0.311	31	22	46.5	5.17	76	448	15.57	6.89	0.64	0.97	86	37	5.18	171	6.45	62.5	330.88	20.88	4.79776
552	1	2015-8-19 10:36:04	1	35	0	0	1	0	Occasional	Occasional	169	82	28.7105	111	81	90	99	0.909091	76			60	28	48.7	4.94	86	476	2.57	6.14	1.2	3.7	78	38	3.15	175	5.76	60.6	253.37	10.43	2.28996
553	1	2015-8-19 10:39:53	1	50	0	0	0	0	30yrs，40/day	0	168	67	23.7387	105	64	94	90	1.04444	72	-1.972	-0.251	30	19	45.7	5.2	80	411	12.03	6.78	0.5	1.65	124	30	3.1	165	14.31	72	160	16.36	3.78098
554	1	2015-8-19 10:40:11	1	36	0	0	1	0	0	Occasional	176	90	29.0548	125	85	91	106	0.858491	80			48	31	51.2	4.98	82	428	2.32	5.43	0.97	3.39	55	42	3.5	156	5.69	50.4	309.58	9.55	2.11373
555	1	2015-8-19 10:40:42	1	47	0	0	1	0	0	often	175	74	24.1633	118	80	86	95	0.905263	66	-0.174	1.457	29	26	47.8	5.96	104	417	3	5.79	1.07	3.47	87	31	4.73	178	6.4	57.3	115.56	14.4	3.8144
556	1	2015-8-19 10:41:04	1	28	0	0	0	0	0	Occasional	170	72	24.9135	131	76	80	99	0.808081	80			32	20	52.6	4.87	61	303	2.19	4.76	1.11	2.86	62	68	4.25	155	5.31	64.2	331.78	13.1	2.83542
557	1	2015-8-19 10:41:20	2	28	0	0	1	0	0	0	159	63	24.9199	119	85	78	95	0.821053	80			107	52	46.5	5.67	65.8	452					70	88		149	6.63	62	262.89	43.15	10.8738
558	1	2015-8-19 10:42:35	2	33	0	0	0	0	0	0			#DIV/0!					#DIV/0!	80			67	37	47.8	5.22	57	359	1.72	5.18	1.16	3.13	92	41	2.86	149	8.18	63.8	54.15	14.4	3.3408
559	1	2015-8-19 10:42:52	2	50	1	1	1	0	0	0	152	72	31.1634	124	88	98	98	1	80	0.769	1.796	20	21	48.8	6.2	56	344	2.96	6.43	1.21	3.97	77	79	4.5	146	7.24	51.6	134.43	24.95	6.87511
560	1	2015-8-19 10:43:38	1	55	0	1	0	0	Occasional	Occasional	156	58	23.833	127	75	82	89	0.921348	76	-2.252	-0.401	66	46	48.6	5.01	74	326	1.34	5.87	1.54	3.52	59	36	3.5	168	7.3	66	79.29	7.8	1.7368
561	1	2015-8-19 10:46:01	1	52	0	0	0	0	22yrs，10/day	Occasional	159	74	29.271	137	95	93	98	0.94898	62	0.334	2.11	17	21	47.2	4.83	82	346	2.16	6.34	2.4	3.14	78	46	5	165	5.42	61.1	103.52	6.95	1.49193
562	1	2015-8-19 10:53:44	1	55	0	1	1	0	0	Occasional	168	75	26.5731	138	107	88	90	0.977778	72			55	44	46.7	5.73	74	359	1.85	4.82	1.15	2.94	74	35	4.98	160	6.4	58.8	142.36	5.17	1.31663
563	1	2015-8-19 11:42:43	2	44	0	0	1	0	0	0	153	52	22.2137	98	60	75	93	0.806452	84	-1.124	0.413	16	19	47.2	4.59	45	318	2.5	5.3	0.9	3.3	42	12	3.96	133	6.23	61.3	55.48	10.36	2.11344
564	1	2015-8-20 8:07:55	1	49	1	1	1	0	27yrs，20/day	Occasional	172	78	26.3656	124	78	94	102	0.921569	72	-1.011	0.681	17	18	44.2	5.98	89	514	2.81	4.48	0.97	2.36	88	20	3.55	157	7.42	65.8	148.38	22.92	6.09163
565	1	2015-8-20 8:10:00	1	52	1	0	1	0	0	Occasional	161	68	26.2336	172	92	81	88	0.920455	72	-0.576	1.2	18	22	43.7	9.34	69	317	1.1	4.52	1.61	2.49	42	25	2.33	133	4.75	58.7	228.9	0.02	0.00830222
566	1	2015-8-20 8:15:37	1	32	0	0	0	0	0	Occasional	178	87	27.4587	117	72	90	105	0.857143	75			27	21	46.7	5.92	90.5	261	2.23	5.8	1.49	3.52	78	23	2.21	160	5.77	57.3	80.27	15.1	3.97298
567	1	2015-8-20 8:16:23	1	32	0	0	1	0	Occasional	Occasional	174	82	27.0842	111	71	93	102	0.911765	66			48	35	44.6	7.17	77.3	406	1.92	4.96	1	3.16	99	49	3.73	165	6.32	57.4	293.71	21.35	6.80353
568	1	2015-8-20 8:21:27	1	29							175	79	25.7959	102	71	83	97	0.85567	72			41	24	51.9	5.46	71	432	1.18	3.81	1.29	2.01	78	32	3.63	158	7.01	49	232.07	9.27	2.24952
569	1	2015-8-20 8:25:35	1	32	0	0	0	1	0	often	167	65	23.3067	102	74	79	93	0.849462	72			19	19	46.4	4.8	86.1	357	1.74	3.7	1.01	1.92	55	17	3.67	152	6.65	63.7	50.54	8.6	1.83467
570	1	2015-8-20 8:29:52	1	52	1	0	1	0	0	Occasional	169	68	23.8087	113	79	85	98	0.867347	70	-2.492	-0.716	49	29	44.1	4.75	80.7	578	2.48	6.25	1.03	4	63	120	6.34	176	6.38	62.8	137.44	6.88	1.45244
571	1	2015-8-20 8:30:21	2	45	0	0	0	0	0	0	150	64	28.4444	136	91	94	99	0.949495	108	3.316	4.076	56	36	53.4	6.66	44	531	11.54	6.77	1.03	2.19	79	93	3.23	144	6.45	65.1	133.33	20.72	6.13312
572	1	2015-8-20 8:31:20	2	56	0	0	1	0	0	0	163	60	22.5827	161	86	90	94	0.957447	72	4.361	5.75	27	23	44.8	5.36	72	286	1.64	5.41	1.7	3.08	90	26	1.86	131	5.52	47.2	72.9	7.39	1.76046
573	1	2015-8-20 8:32:24	1	49	1	0	0	1	12yrs，8/day	Occasional			#DIV/0!					#DIV/0!	72	-1.15	0.542	22	22	44.9	5.18	93.2	558	2.14	4.81	0.98	2.78	87	35	2.88	157	6.09	57.5	149.61	25.33	5.83153
574	1	2015-8-20 8:32:43	2	23	0	0	1	0	0	0	155	73	30.385	131	82	88	108	0.814815	64			82	52	54	6.1	48	441	1.35	6.02	1.23	3.87	61	70	4.92	147	12.35	58.8	78.22	37.43	10.1477
575	1	2015-8-20 8:33:45	1	30	0	0	0	0	0	Occasional	169	90	31.5115	122	68	100	110	0.909091	72	0.118	0.975	28	21	47.1	5.35	75	427	2.85	4.75	0.86	2.77	82	75	1.83	156	8.75	48	118.56	13.43	3.19336
576	1	2015-8-20 8:33:46	2	54	0	0	1	0	0	0	155	60	24.974	139	82	83	94	0.882979	78	2.47	3.734	26	23	48.3	6.26	62.7	355	2.32	5.49	1.19	3.3	91	32	5.73	154	6.31	55.9	132.51	25.74	7.16144
577	1	2015-8-20 8:34:31	1	35	0	0	0	0	3yrs，20/day	Occasional	171	76	25.9909	103	72	94	97	0.969072	78			64	33	46.7	5.17	90.1	388	2.51	5.93	1.01	3.61	84	76	1.88	156	9.85	66.4	261.08	17.52	4.02571
578	1	2015-8-20 8:34:57	1	52	1	0	1	0	0	0	176	83	26.7949	136	82	91	98	0.928571	78	-1.236	0.54	33	25	46.8	6.07	92	520	2.83	5.51	1.19	3.3	56	24	2.63	151	5.87	59.1	370.76	18.33	4.94503
579	1	2015-8-20 8:38:24	2	50	1	0	1	0	0	0	161	60	23.1473	137	75	83	96	0.864583	78	-0.236	0.791	18	19	49.6	5.7	60	322	1.57	4.82	1.39	2.74	76	41	2.06	138	5.92	53.5	37.46	7.31	1.85187
580	1	2015-8-20 8:38:30	2	34	0	0	1	1	0	0	149	53	23.8728	99	61	80	92	0.869565	72			75	44	51.6	4.67	68	419	1.19	4.49	1.13	2.58	89	18	2.62	134	6.55	48	120.62	5.09	1.05646
581	1	2015-8-20 8:40:14	2	28	0	0	0	0	0	0	163	76	28.6048	119	75	91	113	0.80531	68			19	22	45.3	4.94	74.6	382	1.27	4.58	1.77	2.11	63	30	2.87	143	10.72	68.9	26.37	16.26	3.56997
582	1	2015-8-20 8:41:41	1	34	0	0	0	0	10yrs，10/day	Occasional	170	61	21.1073	111	79	78	89	0.876404	60			50	35	52.5	4.77	96.1	411	2.68	4.4	1.09	2.32	89	44	3.02	173	8.53	55.5	120.34	8.47	1.79564
583	1	2015-8-20 8:42:24	1	52	0	0	1	0	30yrs，20/day	0	169	67	23.4586	114	72	90	95	0.947368	78	1.197	2.973	53	32	50.6	4.22	108	518	2.35	4.21	1.57	1.75	101	36	3.49	164	5.6	63.9	216.2	13.1	2.45698
584	1	2015-8-20 8:44:57	1	39									#DIV/0!					#DIV/0!	66			29	24	45.9	5.43	86.7	447	4.17	4.5	1.11	2.11	70	24	2.27	162	7.33	60.3	268.33	7.97	1.92343
585	1	2015-8-20 8:49:46	1	52	0	0	1	0	0	Occasional	179	80	24.968	126	86	86	98	0.877551	60	-0.68	1.1	26	18	48.8	4.91	79	482	2.57	4.47	1.04	2.54	62	29	6.5	158	4.43	55.5	190.82	20.13	4.39281
586	1	2015-8-20 8:51:14	1	58	0	1	1	0	0	Occasional	165	77	28.2828	115	81	91	97	0.938144	66	-1.187	0.734	42	27	47	5.43	76	306	0.96	4.51	1.43	2.57	54	25	2.66	172	4.78	46.5	217.56	7.65	1.8462
587	1	2015-8-20 8:51:31	1	39	0	0	0	0	0	Occasional	160	76	29.6875	117	76	90	101	0.891089	72	-0.378	0.957	28	28	46.3	5.41	86.2	448	1.56	5.82	1.3	3.72	71	73	2.08	142	4.85	54.3	120.62	4.69	1.12768
588	1	2015-8-20 8:52:31	1	51	0	0	1	0	Occasional	0	162	82	31.2452	179	117	91	103	0.883495	88			67	47	44.2	6.07	88.3	393	3.18	4.61	0.85	2.26	96	41	2.98	150	5.99	45.6	231.16	33.69	9.08881
589	1	2015-8-20 8:54:24	1	57	0	0	0	0	40yrs，20/day，	Occasional	169	75	26.2596	130	84	91	96	0.947917	66			42	26	47.1	5.34	59	418	2.18	5.09	1.23	2.93	55	24	2.97	158	5.32	60.7	189.01	10.25	2.43267
590	1	2015-8-20 8:54:32	1	39	0	0	1	0	0	Occasional	173	77	25.7276	114	76	86	97	0.886598	78			37	25	46.8	5.39	101.1	551	3.06	4.84	1.07	2.58	60	25	3.9	166	6.98	67.2	285.1	11.95	2.86269
591	1	2015-8-20 8:57:28	1	41	1	0	1	0	0	Occasional	169	85	29.7609	156	110	96	102	0.941176	72			45	35	47.6	6.05	96.9	479	4.45	4.4	0.8	1.92	91	67	4.36	151	8	64.8	218.92	45.24	12.1645
592	1	2015-8-20 8:58:00	1	57							171	73	24.9649	126	84	86	95	0.905263	68			16	12	48.9	5.78	73	476	3.98	5.13	1.12	2.54	48	35	2.6	142	5.68	49.8	141.26	34.74	8.92432
593	1	2015-8-20 8:58:53	1	55	1	0	1	0	0	0	165	81	29.7521	135	77	107	99	1.08081	90	1.549	3.4	16	18	47	5.76	67	400	2.83	5.64	1.06	3.42	86	31	3.32	148	7.87	59.8	143.45	11.59	2.96704
594	1	2015-8-20 9:01:11	1	67	0	0	1	1	21yrs，10/day	Occasional	168	80	28.3447	128	77	101	102	0.990196	72	0.761	2.855	42	33	43.3	6.59	83	444	1.34	4.47	1.07	2.85	87	25	4.27	165	8.69	52	178.13	10.27	3.00797
595	1	2015-8-20 9:03:36	1	61	0	0	0	0	0	Occasional	168	71	25.1559	131	72	85	93	0.913978	72	-0.991	0.992	21	26	45.7	6.52	94	439	2.34	5.66	1.44	3.29	67	27	3.23	146	4.52	61.4	209.86	6.05	1.75316
596	1	2015-8-20 9:06:10	1	47	0	1	0	0	20yrs，8/day	Occasional	174	69	22.7903	125	67	90	94	0.957447	72			41	30	51	5.58	67	435	5.14	7.12	1.28	3.88	57	23	10.44	161	4.61	49.8	89.71	26.2	6.4976
597	1	2015-8-20 9:10:24	1	41	0	0	0	0	10yrs，40/day	0	179	93	29.0253	120	74	104	108	0.962963	90	-1.541	-0.123	39	33	47.2	5.68	75.2	415	9.25	4.86	0.76	1.73	65	28	3.43	121	5.66	63.9	144	22.28	5.62446
598	1	2015-8-20 9:11:14	1	32	0	0	0	0	0	0	167	69	24.7409	104	68	84	95	0.884211	72			19	20	54.1	5.36	61	363	1.26	4.5	1.53	2.46	75	20	3.1	156	5.93	63.2	286.91	4.66	1.11012
599	1	2015-8-20 9:12:03	1	37	0	0	1	0	21yrs，20/day	Occasional	177	76	24.2587	109	75	87	97	0.896907	72	1.832	3.077	66	25	48	5.51	83	458	2.11	5.6	1.11	3.5	86	69	3.27	170	13.94	71.7	150.84	6.66	1.63096
600	1	2015-8-20 9:13:03	1	70	1	1	1	0	0	0	170	80	27.6817	154	80	95	101	0.940594	66	0.21	2.352	37	31	41.2	6.47	89.5	434	1.12	3.68	1.11	1.99	63	15	2.39	163	4.91	59.3	221.64	2.98	0.856916
601	1	2015-8-20 9:14:21	1	52	1	0	1	0	0	Occasional	171	73	24.9649	133	72	94	95	0.989474	66	0.162	1.938	36	28	43.9	15.3	59	263	1.35	5.22	1.45	3.06	63	14	2.02	119	4.25	59.1	367.14	12.23	8.3164
602	1	2015-8-20 9:17:13	1	31	0	0	0	0	0	Occasional	165	72	26.4463	110	74	85	96	0.885417	72			47	32	50.1	4.15	64	406	0.91	3.99	1.04	2.38	67	17	2.99	170	5.42	57.1	152.48	11.81	2.17829
603	1	2015-8-20 9:18:03	1	31	0	0	0	0	0	often	165	61	22.4059	110	67	78	92	0.847826	72			18	19	50.6	5.21	69	420	0.93	5.32	1.71	3.05	94	21	3.21	149	5.01	57.5	165.44	11.33	2.62352
604	1	2015-8-20 9:21:34	1	29	0	0	0	0	0	Occasional	172	87	29.4078	122	86	89	101	0.881188	78			22	23	50.5	5.74	81	456	1.48	5.76	1.16	3.75	63	17	2.96	166	7.04	48.5	122.26	12.18	3.10725
605	1	2015-8-20 9:27:26	1	36	1	0	0	0	0	Occasional	163	79	29.7339	152	104	92	100	0.92	72			35	19	44.5	6.11	95.4	430	5.21	4.86	0.77	1.83	76	38	6.22	155	11.11	69	132.24	16.67	4.52683
606	1	2015-8-20 9:28:44	2	45	0	0	1	0	0	0	152	56	24.2382	126	88	80	92	0.869565	84	3.308	4.068	44	30	47.9	6.9	58.9	377	2.31	6.38	1.37	3.92	77	29	3.06	132	6.97	52	218.02	15.14	4.64293
607	1	2015-8-20 9:33:17	1	48	1	0	0	0	0	often	170	85	29.4118	128	84	101	106	0.95283	72	-1.782	-0.12	28	19	44.9	4.61	84.1	496	2.02	4.24	1.06	2.28	92	46	2.68	168	8.29	66.6	337.22	18.19	3.72693
608	1	2015-8-20 9:34:32	1	52	1	1	1	0	20yrs，20/day	3yrs，100-150g/day	162	73	27.8159	153	107	90	99	0.909091	78			86	57	45.7	8.24	91	449	1.36	5.5	1.74	3.21	81	48	3.51	162	6.51	64.5	180.4	22.26	8.15211
609	1	2015-8-20 9:36:20	1	52	0	0	0	0	20yrs，10/day	Occasional	165	63	23.1405	127	82	85	90	0.944444	60	-2.276	-0.5	33	30	49.6	4.82	81	345	2.94	5.95	1.23	3.51	65	34	7.03	172	4.18	56.7	313.2	1.04	0.222791
610	1	2015-8-20 9:40:00	1	27	0	0	0	0	0	0	173	85	28.4005	125	89	93	102	0.911765	60			54	28	51.4	5.09	70	393	1.18	4.25	0.91	2.67	112	61	1.78	177	8.43	67.4	122.67	9.93	2.24639
611	1	2015-8-20 9:43:08	1	32	0	0	1	0	0	Occasional	167	59	21.1553	106	69	79	89	0.88764	72			24	21	53.2	5	61	435	3.16	3.82	0.85	1.85	65	29	3.4	158	8.61	75.3	238.41	11.66	2.59111
612	1	2015-8-20 9:44:16	1	31	0	0	0	0	1yr，10/day	Occasional	165	77	28.2828	131	83	91	101	0.90099	66			74	33	52.9	4.89	62	445	2.82	5.12	0.95	3.04	81	113	2.8	155	6.92	52.7	192.18	16.92	3.67728
613	1	2015-8-20 9:48:42	1	45	0	0	1	0	0	often	170	79	27.3356	148	98	93	100	0.93	78	-2.001	-0.436	36	28	47.5	5.56	66	315	2.07	4.77	1.33	2.65	75	40	13.15	120	5.08	51.5	202.61	10.41	2.57243
614	1	2015-8-20 10:03:57	1	28	0	0	0	0	0	0	172	75	25.3515	133	82	80	98	0.816327	78			61	35	48.4	5.56	89.9	345	2.15	4.4	0.97	2.53	82	111	6.54	169	6.84	61	166.8	15.06	3.72149
615	1	2015-8-20 10:06:25	1	46	1	0	1	0	30yrs，20/day	often	172	78	26.3656	122	91	91	95	0.957895	70	3.077	4.676	55	35	49.2	12.24	105	245	2.75	6.55	1.24	3.98	69	66	3.21	168	6.56	64.9	152.62	10.86	5.90784
616	1	2015-8-20 10:09:10	1	31	0	0	0	0	0	0	181	105	32.0503	112	67	100	112	0.892857	72			69	45	44.6	5.17	88.4	632	1.55	4.52	1.02	2.73	68	40	2.34	152	5.92	57.3	199.43	15.5	3.56156
617	1	2015-8-20 10:11:59	1	38	0	0	0	1	0	0	169	66	23.1084	110	76	81	96	0.84375	72	-1.51	-0.219	37	28	47.9	5.9	77	517	2.4	5.79	1.21	3.44	88	85	2.25	153	4.07	48.4	255.64	9.67	2.53569
618	1	2015-8-20 10:16:33	1	48	0	0	0	0	0	often	167	68	24.3824	13	76	80	96	0.833333	72	-1.655	0.007	20	28	47.2	4.8	111	456	1.36	6.28	1.89	3.73	52	12	6.08	163	6.04	66.9	295.52	9.68	2.06507
619	1	2015-8-20 10:20:34	1	53	0	0	0	0	0	0	173	67	22.3863	122	75	86	95	0.905263	96	-0.256	1.547	28	22	46.3	6.07	75	391	1.19	5.17	1.29	3.15	92	41	3.9	167	7.34	59.6	203.51	12.86	3.46934
620	1	2015-8-20 10:25:04	1	41	0	1	0	0	0	often	160	80	31.25	137	89	98	101	0.970297	72			31	29	51.7	5.68	75	449	3.13	4.85	0.86	2.69	79	78	3.82	154	6.37	68.4	172.24	16.77	4.23349
621	1	2015-8-20 10:28:13	1	44	0	0	0	0	0	Occasional	176	91	29.3776	117	70	95	105	0.904762	60			26	21	45.1	5.55	140	474	1.86	5.4	1.09	3.38	102	23	3.62	147	6.68	66.3	142.22	16.18	3.99107
622	1	2015-8-20 10:35:12	1	38	0	0	0	0	0	Occasional	172	83	28.0557	119	80	88	104	0.846154	75			18	31	44.3	4.76	98.9	387	0.76	4.12	1.27	2.34	75	37	3.65	166	7.48	52.6	112	5.51	1.16567
623	1	2015-8-20 10:35:18	2	51	0	0	0	0	0	0	168	61	21.6128	112	81	75	92	0.815217	66	-0.058	1.026	19	18	47.6	5.63	63.4	287	1.13	5.02	1.48	2.96	88	17	3.67	135	4.91	51.6	68.09	15.71	3.93099
624	1	2015-8-20 10:46:42	1	49	0	0	1	1	21yrs，10/day	Occasional	167	73	26.1752	111	68	85	94	0.904255	66			16	19	47.8	4.96	69	340	2.27	6.57	1.31	4.32	72	26	2.15	143	5.26	52.9	183.12	7.51	1.65554
625	1	2015-8-20 10:48:09	1	52	0	0	0	0	0	0	172	89	30.0838	120	80	102	109	0.93578	66	0.281	2.057	47	30	45.7	5.42	101	644	2.78	4.94	1.22	2.47	66	45	3.37	154	7.2	65	256.54	12.45	2.99907
626	1	2015-8-20 10:48:29	1	52	0	0	1	0	0	Occasional	180	88	27.1605	147	95	94	106	0.886792	66			51	42	45.2	5.19	92	423	2.19	4.81	1.22	2.74	63	28	2.72	164	7.18	70.5	150.84	9.02	2.08061
627	1	2015-8-20 11:01:46	2	49	0	0	1	0	0	0	172	75	25.3515	140	83	88	104	0.846154	72	2.602	3.573	19	19	43.9	6.95	63	332	2.45	4.14	0.97	2.17	56	16	5.05	135	4.89	54	67.26	10.7	3.30511
628	1	2015-8-20 11:03:57	1	42	0	0	1	0	0	Occasional	172	95	32.112	132	79	100	109	0.917431	72	-0.177	1.28	23	15	46.1	5.82	96	418	1.79	4.15	0.92	2.35	63	25	3.76	154	5.62	49.7	57.47	28.37	7.33837
629	1	2015-8-20 11:04:27	1	41	0	0	1	0	Occasional	often	157	62	25.1532	102	74	87	90	0.966667	72	0.83	2.248	74	44	48.1	5.52	72	370	1.89	6.26	1.61	3.87	60	75	4.99	147	5.47	44.1	367.59	11.45	2.80907
630	1	2015-8-20 13:30:50	1	31	0	0	0	0	14yrs，10-20/day	Occasional	183	89	26.5759	116	83	93	100	0.93	66			110	70	52.3	4.87	93.6	586	2.45	6.16	1.42	3.57	87	111	2.29	167	7.89	53.9	376.2	14.53	3.14494
631	1	2015-8-20 13:30:55	1	52	1	0	0	1	23yrs，5/day	0	168	85	30.1162	134	92	111	101	1.09901	78	-1.978	-0.202	59	44	46.5	8.99	65.3	429	2.54	4.27	0.78	2.41	88	101	3.82	158	6.47	61.1	76.07	20.48	8.1829
632	1	2015-8-20 13:32:14	1	51	0	0	1	1	33yrs，5-6/day	0	175	79	25.7959	158	96	89	99	0.89899	72	-1.009	0.74	69	37	48.1	5.26	101.2	517	3.74	5.26	1.12	2.66	111	154	2.58	156	5.53	48.4	398.45	17.22	4.02565
633	1	2015-8-20 13:33:41	2	41	0	0	1	0	0	0	155	73	30.385	93	67	96	107	0.897196	84	1.45	2.023	16	15	45.3	5.27	74	439	2.07	4.86	1.26	2.58	82	10	2.68	122	6.37	57.3	64.23	15.61	3.65621
634	1	2015-8-20 13:35:14	2	32	0	0	1	0	0	0	162	57	21.7193	99	75	74	93	0.795699	69			30	27	45.1	5	69	300	1.78	5.66	2	3.05	66	33	2.9	157	6.31	51.9	155.29	18.62	4.13778
635	1	2015-8-20 13:42:17	1	25	0	0	1	0	0	Occasional	182	98	29.5858	136	78	97	106	0.915094	72			37	25	47.4	5.21	84.9	463	2.11	4.42	1.11	2.34	102	68	4.16	165	6.8	71	485.16	18.69	4.32777
636	1	2015-8-20 13:43:07	1	28	0	0	0	0	0	Occasional	164	83	30.8596	122	72	87	106	0.820755	70			99	52	48.9	5.2	82.1	435	1.52	5.49	1.41	3.16	62	100	2.33	150	5.94	49.7	518.19	17.84	4.12302
637	1	2015-8-20 13:43:12	1	35									#DIV/0!					#DIV/0!				30	24	49.9	3.52	73	511	0.81	4.74	1.18	2.89	101	84	5.87	151	8.74	52.6	521.29	15.04	2.35292
638	1	2015-8-20 13:55:04	1	29	0	0	1	0	0	Occasional	172	73	24.6755	115	71	85	96	0.885417	72	1.424	2.214	87	41	47.4	5.21	81	406	1.99	4.78	1	2.97	64	33	1.81	164	6.22	49.9	311.74	17.48	4.04759
639	1	2015-8-20 15:56:19	1	51	0	0	0	0	0	Occasional	156	60	24.6548	124	85	85	93	0.913978	72	0.847	2.596	83	49	44.7	4.81	63	389	3.74	4.68	1.15	2.24	106	182	3.97	155	8.54	64.2	131.22	10.95	2.34087
640	1	2015-8-21 8:06:45	1	28	0	0	1	0	1	0	174	95	31.378	108	74	95	107	0.88785	78	0.392	1.112	118	49	50.1	4.99	79	422	1.07	4.7	1.12	2.88	74	56	3.39	168	9.06	50.4	210.58	22	4.87911
641	1	2015-8-21 8:09:49	1	26	1	0	0	0	0	Occasional			#DIV/0!	130	84			#DIV/0!	78	1.353	1.92	44	28	48.3	4.32	84	355	2.55	3.44	1.04	1.52	65	29	2.28	175	9.11	51.8	387.1	13.02	2.49984
642	1	2015-8-21 8:11:23	1	24	0	0	0	0	0	Occasional	170	74	25.6055	148	93	80	97	0.824742	60	1.089	1.487	20	18	48.4	5.05	91	440	1.08	3.95	1.54	2	81	29	2.12	155	4.88	57.6	382.97	10.68	2.39707
643	1	2015-8-21 8:13:28	1	61	0	0	0	0	0	Occasional	157	60	24.3418	113	69	78	90	0.866667	66	1.03	3.013	18	22	50.7	5.81	60	376	2.1	4.32	1.3	2.34	71	11	2.82	153	4.55	56.3	312.77	10.77	2.78105
644	1	2015-8-21 8:15:52	1	40	0	0	1	1	0	0	171	70	23.939	142	94	91	101	0.90099	60	-1.758	-0.38	77	50	48.1	5.1	81	540	1.1	3.3	0.71	1.91	72	35	28.73	162	8.31	68.7	425.29	20.73	4.6988
645	1	2015-8-21 8:19:17	1	35	0	0	0	0	0	0	175	73	23.8367	134	81	84	100	0.84	72			27	22	45.8	4.81	98.2	353	2.16	3.78	0.82	1.84	100	19	2.43	153	7.93	60.8	435.61	13.54	2.89455
646	1	2015-8-21 8:20:10	1	33	0	0	0	1	0	Occasional			#DIV/0!	116	87			#DIV/0!	72			43	29	49	4.74	99	524	2.44	4.4	0.99	2.42	59	39	2.83	156	4.99	51.7	103.35	15.47	3.25901
647	1	2015-8-21 8:21:11	1	46	0	0	1	0	Occasional	Occasional	169	73	25.5593	115	78	84	98	0.857143	72	1.556	3.155	34	25	50	5.22	78	380	2.57	5.66	1.15	3.44	53	49	3.05	168	5.96	56.1	550.19	15.58	3.61456
648	1	2015-8-21 8:22:14	1	46	1	0	1	0	20yrs，20/day	Occasional	164	70	26.0262	138	97	95	97	0.979381	86	-1.683	-0.084	33	26	47.7	5.53	92	372	2.35	5.76	1.31	3.35	111	70	6.64	150	9.46	67.9	378.84	17.94	4.40925
649	1	2015-8-21 8:23:07	1	38	0	0	1	0	0		175	75	24.4898	119	82	88	94	0.93617	72	2.312	3.603	65	41	47.4	4.94	89	435	1.95	5.98	1.31	3.6	75	156	4.12	153	8.68	65.9	411.87	15.66	3.43824
650	1	2015-8-21 8:26:30	1	46	1	1	0	0	10yrs, 5/day	0	169	75	26.2596	148	96	91	99	0.919192	84			38	31	35.3	4.84	152	609	16.48	9.76	0.8	0.83	106	153	2.34	162	7.75	63.8	128.51	41.85	9.0024
651	1	2015-8-21 8:31:55	1	44	1	0	1	0	10yrs, 10/day	often	166	68	24.677	131	81	90	95	0.947368	70	-1.418	0.113	25	19	45.7	5.71	78	334	1.29	3.91	0.93	2.22	96	35	4.12	145	5.75	60.8	323.1	18.91	4.79894
652	1	2015-8-21 8:33:14	1	34							173	78	26.0617	114	77	67	99	0.676768	78			37	21	47.5	5.34	79	435	1.65	5.29	1.18	3.21	92	51	2.83	171	6.81	59.8	507.87	16.4	3.89227
653	1	2015-8-21 8:36:11	2	56							166	68	24.677	131	81	90	95	0.947368	72			49	36	48.6	7.32	82.5	700	3.22	5.93	1.1	3.42	141	91	3.55	144	5.57	50.8	364.39	8.87	2.88571
654	1	2015-8-21 8:39:36	1	57	1	0	1	0	0	0	159	64	25.3155	113	70	86	95	0.905263	68	-0.42	1.478	21	23	48.5	5.7	100	417	0.65	6.17	1.75	3.94	49	23	3.56	154	9.25	51.2	184.77	12.07	3.05773
655	1	2015-8-21 8:41:18	1	78	1	0	0	0	0	Occasional			#DIV/0!					#DIV/0!	78	-1.128	1.127	20	27	46.4	5.23	123	492	1.53	4.09	0.94	2.29	72	20	2.22	139	9.2	62.6	310.71	15.47	3.59592
656	1	2015-8-21 8:46:05	1	40	0	0	0	0	11yrs，10/day	Occasional	175	79	25.7959	103	79	88	100	0.88	60			37	22	51.9	4.98	86	448	1.88	4.77	1.3	2.69	47	23	1.83	153	6.51	59	464.52	21.87	4.84056
657	1	2015-8-21 8:52:02	2	41	1	0	0	0	0	0			#DIV/0!					#DIV/0!	70	-1.054	-0.481	19	16	44.5	5.97	51	290	1.03	5.29	1.35	3.2	77	32	4.08	146	7.21	55	143.17	17.45	4.63007
658	1	2015-8-21 8:52:05	1	34	1	0	0	0	9yrs，20/day	0	168	98	34.7222	133	82	102	108	0.944444	74	-1.475	-0.381	131	67	45.5	5.7	83	409	4.51	5.38	1.07	2.74	83	67	2.86	179	9.42	59.2	377.81	99.14	25.1155
659	1	2015-8-21 8:56:43	1	43	0	0	0	0	0	0			#DIV/0!	107	66			#DIV/0!		-2.721	-1.227	18	25	47.6	4.88	85	411	1.21	4.32	1.07	2.57	101	26	7.11	158	5.86	46	321.03	9.7	2.10382
660	1	2015-8-21 8:56:49	2	32	0	0	1	0	0	0	158	57	22.8329	98	61	79	92	0.858696	84	1.128	1.375	36	34	49.4	4.56	63	320	0.9	4.31	1.65	2.26	109	12	2.38	134	6.01	59.3	27.31	10.93	2.21515
661	1	2015-8-21 8:57:36	1	48	1	0	1	0	0	Occasional	162	83	31.6263	158	107	105	104	1.00962	72	0.55	2.213	103	64	46.2	6.52	104	461	2.57	4.98	1.03	2.91	114	75	3.8	154	6.53	50.6	474.84	22.18	6.42727
662	1	2015-8-21 9:00:48	1	45	0	0	1	0	0	Occasional	166	74	26.8544	146	93	88	95	0.926316	74			66	46	49	5.46	85.1	448	1.96	4.13	0.8	2.27	54	41	3.28	172	6.2	66.3	43.44	16.1	3.90693
663	1	2015-8-21 9:02:28	1	41	0	0	1	0	20yrs，20/day	Occasional	173	82	27.3982	120	83	90	102	0.882353	66			32	25	49.4	5.24	75.6	396	2.79	5.65	1.16	3.22	69	19	8.19	174	6.57	60	427.35	16.67	3.88226
664	1	2015-8-21 9:02:48	1	39	0	0	1	0	Occasioanl	Occasional			#DIV/0!	118	76			#DIV/0!	72			44	23	45.4	5.89	84.1	408	1.35	5.31	1.03	3.44	58	28	1.54	160	4.67	61	381.94	14.19	3.71463
665	1	2015-8-21 9:05:46	1	37	1	0	1	0	16yrs, 20/day	Occasional	175	76	24.8163	117	81	86	98	0.877551	72	-0.881	0.364	88	50	49.7	5.51	92	524	2.86	4.11	0.99	2.07	61	144	5.83	143	5.91	50.4	307.61	18.39	4.50351
666	1	2015-8-21 9:06:46	1	52	0	0	0	0	0	often	155	69	28.7201	126	80	87	99	0.878788	60	-0.726	1.05	22	22	47.2	6.25	90	369	5.5	4.37	0.81	1.59	106	102	4.03	162	6.65	57.4	112.76	24.21	6.725
667	1	2015-8-21 9:12:45	1	50	0	0	0	0	0	0	165	77	28.2828	130	83	95	98	0.969388	72	-1.385	0.336	23	21	42.3	5.63	76.6	434	1.8	5.52	0.99	3.51	72	35	7.6	137	5.69	65.5	453.16	16.49	4.12616
668	1	2015-8-21 9:13:12	1	48	0	0	1	0	0	Occasional	178	77	24.3025	124	71	91	100	0.91	58	-0.6	1.062	47	34	46.4	5.33	93	445	2.31	5.24	1.53	2.65	122	144	5.47	142	5.02	61.3	142.62	12.19	2.88768
669	1	2015-8-21 9:16:38	1	64	1	0	0	0	0	0	168	67	23.7387	149	88	91	95	0.957895	84	-1.088	0.953	31	21	49.7	6.11	89	417	2.49	5.65	1.17	3.32	56	53	3.43	157	7.39	48.3	368.52	14.07	3.82079
670	1	2015-8-21 9:17:32	2	71	0	0	1	0	0	0	149	51	22.9719	115	63	84	90	0.933333	66			32	31	43.7	5.69	54	254	1.24	4.29	1.62	2.17	162	187	6.81	132	5.35	52.9	146.61	11.44	2.89305
671	1	2015-8-21 9:21:44	1	28	0	0	0	0	0	Occasional	166	66	23.9512	126	84	81	93	0.870968	84			59	29	52.1	5.21	96.8	384	3.35	5.34	0.87	3.04	120	59	4.1	178	7.36	61.9	155.48	19.02	4.40419
672	1	2015-8-21 9:25:34	2	62	1	0	0	0	0	0	147	55	25.4524	102	63	84	93	0.903226	70	1.015	2.798	23	24	45	7.21	62	425	5.04	6.16	1.09	2.95	90	28	2.26	151	6.59	44.3	280.77	9.81	3.14356
673	1	2015-8-21 9:31:30	1	33	0	0	0	0	18yrs, 20/day	Occasional	182	95	28.6801	135	85	101	105	0.961905	60			24	22	47.1	5	84	335	0.85	4.53	1.29	2.62	61	51	11.43	160	7.03	65.1	131.4	15.14	3.36444
674	1	2015-8-21 9:40:32	1	44	1	0	1	0	0	0	167	74	26.5338	142	92	85	100	0.85	86	-2.177	-0.646	78	42	48.4	9.09	68	307	1.52	5.97	1.35	3.8	88	37	3.97	172	6.76	46.7	428.39	18.49	7.46996
675	1	2015-8-21 9:42:28	1	46	0	1	0	0	31yrs, 10/day	often	166	71	25.7657	115	71	83	93	0.892473	50			34	36	48.9	6.24	106	372	1.28	3.74	1.34	1.84	54	48	7.13	133	7.83	50.9	467.61	13.64	3.78283
676	1	2015-8-21 9:44:59	1	74	1	0	0	0	20yrs, 6/day	0	161	74	28.5483	143	75	97	104	0.932692	60	2.028	4.229	50	35	44	5.45	80	381	4.09	4.7	0.78	2.1	83	27	3.12	139	5.27	54.3	529.55	13.62	3.29907
677	1	2015-8-21 9:45:03	2	25	0	0	0	0	0	0	160	56	21.875	111	62	78	91	0.857143	72			34	28	50.4	5	53	294	1.96	5.21	1.35	3.1	62	35	2.53	138	5.5	51.8	42.3	29.84	6.63111
678	1	2015-8-21 9:48:07	1	40	0	0	0	0	0	often	153	63	26.9127	140	97	84	91	0.923077	84			96	57	51.2	6.6	89	496	5.64	5.73	1.36	2.59	89	96	3.66	159	6.48	59.5	433.55	20.38	5.97813
679	1	2015-8-21 9:54:46	1	36	0	0	1	0	0	Occasional	179	90	28.089	133	87	97	102	0.95098	72			23	31	50.7	5.16	76	489	3.12	4.13	0.85	2.15	66	68	4.78	170	6.83	67.3	462.45	15.84	3.63264
680	1	2015-8-21 9:56:37	2	56	0	0	1	0	0	0	149	55	24.7737	119	71	89	96	0.927083	70	-0.915	0.473	33	42	50.1	5.41	74	265	2.52	4.06	1.07	1.93	89	11	2.34	128	7.28	50.7	152.22	11.99	2.88293
681	1	2015-8-21 9:57:33	1	40	0	0	0	0	0	Occasional	171	88	30.0947	119	71	110	106	1.03774	50	0.472	1.849	47	29	48.7	7.03	96	365	3.39	4.92	1.06	2.68	58	48	6.63	169	7.19	51.7	512	19.52	6.09892
682	1	2015-8-21 10:00:26	1	59	0	0	0	0	0	Occasional	164	71	26.398	129	77	86	98	0.877551	60			18	22	42.6	6.34	88.3	364	0.79	3.92	1.17	2.32	79	14	5.2	156	6.61	59	125.97	8.86	2.49655
683	1	2015-8-21 10:02:55	2	52	0	0	1	0	0	0	159	58	22.9421	113	64	83	96	0.864583	84	0.217	102.4	37	35	49.5	4.88	56	311	2.67	5.48	1.58	2.81	106	94	7.57	144	8.14	61.7	69.79	15	3.25333
684	1	2015-8-21 10:04:37	1	27	0	0	1	0	5yrs, 10/day	0	180	80	24.6914	112	70	85	97	0.876289	72	-0.766	-0.12	45	29	47.5	4.55	100	419	2.43	5.05	0.99	3.05	146	84	2.26	165	6.48	56.8	167.23	12.55	2.53789
685	1	2015-8-21 10:07:28	1	26	0	0	1	0	8yrs，15/day	Occasional	177	100	31.9193	111	72	94	114	0.824561	76			51	30	44.2	4.41	110.7	456	2.65	5.52	1.1	3.3	112	47	2.81	155	6.58	50.8	126.88	11.21	2.19716
686	1	2015-8-21 10:09:59	2	59	1	0	1	0	0	0	159	73	28.8754	133	82	89	99	0.89899	74			42	37	44	5.19	78.2	412	1.83	5.95	1.37	3.53	60	36	3.65	127	3.96	39.7	460.39	15.78	3.63992
687	1	2015-8-21 10:14:30	1	29	0	0	1	0	0	Occasional	170	93	32.1799	141	109	103	100	1.03	80			56	33	48.3	5.53	81	617	4.96	5.37	0.88	2.88	115	29	2.14	168	9.26	65.3	409.81	16.72	4.1094
688	1	2015-8-21 10:14:33	1	50	0	0	0	0	0	Occasional	163	70	26.3465	116	73	89	96	0.927083	78	-1.186	0.535	31	23	48.1	5.64	82.3	311	1.32	5.91	1.11	3.92	76	23	2.36	156	5.69	47.8	149.14	10.67	2.67461
689	1	2015-8-21 10:16:02	1	25	1	0	0	0	7yrs, 10/day	Occasional	174	99	32.6992	129	84	100	107	0.934579	60	2.771	3.255	68	35	48.3	4.73	78	564	2.25	5.04	1.04	2.9	60	60	8.43	154	7.87	58.2	146.79	17.42	3.66207
690	1	2015-8-21 10:18:02	1	46	0	0	0	0	0	0	163	65	24.4646	135	95	79	93	0.849462	72	1.403	3.002	21	19	48.7	6.4	98	437	1.12	5.08	1.3	3.18	79	24	5.55	163	11.56	69.7	367.48	15.5	4.40889
691	1	2015-8-21 10:18:22	1	42	1	0	1	0	0	often	169	75	26.2596	109	73	85	97	0.876289	72			13	14	48.8	5.1	81.2	432	1.19	4.26	1.23	2.35	80	13	4.48	149	5.98	53.7	377.81	11.81	2.67693
692	1	2015-8-21 10:30:20	1	47	0	0	0	0	0	Occasional	172	73	24.6755	121	85	86	96	0.895833	72	-0.891	0.74	60	38	50.6	5.64	90	500	3.05	4.75	1.13	2.53	65	298	2.91	156	5.48	52.6	427.55	13.32	3.33888
693	1	2015-8-21 10:30:27	1	46	0	0	1	0	0	Occasional	168	64	22.6757	142	87	83	91	0.912088	60			38	29	48.5	5.59	84	379	2.24	4.86	1.16	2.82	96	58	2.77	169	4.86	53.5	243.61	9.93	2.46705
694	1	2015-8-21 10:31:56	2	34	0	0	0	0	0	0	157	58	23.5304	111	67	84	92	0.913043	78			60	41	50.1	5.28	70	360	1.81	3.48	1.04	1.72	54	33	5.27	146	7.49	68	29.79	15.67	3.67723
695	1	2015-8-21 10:34:01	1	31	0	0	1	0	0	Occasional	165	80	29.3848	127	80	86	102	0.843137	84			86	33	50.7	5.94	68	410	1.45	3.71	0.99	2.11	121	53	3.83	161	7.9	67.6	371.61	27.49	7.25736
696	1	2015-8-21 10:35:30	1	27	0	0	1	0	8yrs, 20/day	Occasional	172	84	28.3937	127	89	89	101	0.881188	72			46	37	48.6	6.01	113.8	728	1.9	4.79	1.15	2.71	55	26	3.64	162	5.15	56.9	435.61	15.95	4.26042
697	1	2015-8-21 10:35:37	1	45	0	0	1	0	21yrs, 20/day	often	170	73	25.2595	139	88	87	94	0.925532	80	-1.42	0.145	15	25	45.5	4.93	92	464	2.36	4.52	1.09	2.42	139	34	6.03	167	7.95	73.8	429.42	17.46	3.82568
698	1	2015-8-21 10:36:38	1	45	1	0	1	0	23yrs, 10/day	Occasional	167	76	27.2509	129	92	95	99	0.959596	74	3.016	4.581	16	13	49.2	4.91	79	425	0.79	4.49	1.18	2.81	59	19	5.22	168	6.22	65.2	408.77	15.78	3.44355
699	1	2015-8-21 10:36:45	2	58	0	0	0	0	0	0	151	63	27.6304	119	68	98	94	1.04255	60			98	83	41.8	5.92	60.4	317	1.87	4.7	1.11	2.86	125	67	3.17	133	6.07	43.3	161.03	21.33	5.61216
700	1	2015-8-21 10:36:57	1	45	1	0	0	0	31yrs, 10/day	often	175	85	27.7551	127	85	95	101	0.940594	74	-0.828	0.737	28	19	49.2	9.43	88	447	3	5.34	1.31	2.9	58	49	6.07	164	5.85	53.3	450.06	18.17	7.61525
701	1	2015-8-21 10:37:11	1	30	0	0	1	0	10yrs, 13/day	Occasional	179	80	24.968	122	82	87	100	0.87	80			218	117	53.5	5.07	80	541	6.62	5.17	1.02	2.03	106	194	3.45	163	4.54	46	569.81	14.21	3.20199
702	1	2015-8-21 10:37:27	1	36									#DIV/0!					#DIV/0!		-1.72	-0.524	46	24	48	5.23	73	487	2.83	5.54	0.79	3.42	79	67	2.73	152	8.19	58.2	510.97	6.77	1.57365
703	1	2015-8-21 10:37:53	1	60	0	0	0	0	0	0	167	64	22.9481	133	88	84	91	0.923077		1.568	3.531	32	25	47	5.27	79	357	1.09	4.16	1.49	2.27	60	22	1.03	155	6.15	46.2	299.35	16.64	3.89746
704	1	2015-8-21 10:37:59	1	39	0	1	1	0	11yrs,20/day	Occasional	179	79	24.6559	120	85	89	97	0.917526	78			131	55	46.1	5.04	88.8	463	4.38	4.62	0.86	1.93	58	42	10.7	151	6.46	54.3	353.03	19.88	4.45312
705	1	2015-8-21 10:38:28	2	43	1	0	1	0	0	0	157	53	21.5019	137	86	75	89	0.842697	78			47	32	49.3	5.37	58	229	1.34	4.09	1.2	2.23	64	28	3.56	147	8.37	57	47.92	15.47	3.69217
706	1	2015-8-21 10:39:20	1	34	0	0	1	0	9yrs，20/day	Occasional	178	79	24.9337	114	65	84	94	0.893617	66			43	26	52.1	6.43	73	362	2.53	5.31	1.08	3.24	60	91	4.16	158	8.32	45	301.42	25.32	7.23589
707	1	2015-8-21 10:39:27	1	45	0	0	0	0	20yrs, 10/day	Occasional	163	71	26.7229	106	65	91	95	0.957895	66	-1.884	-0.318	38	29	46.3	6.27	89	503	1.78	6.14	1.57	3.75	55	105	4.7	160	5.95	54.3	104.25	13.33	3.71463
708	1	2015-8-21 10:39:35	1	27	1	0	0	0	10yrs, 10/day	Occasional	177	101	32.2385	131	84	102	111	0.918919	76			100	72	48.8	5.16	94	413	1.37	5.56	1.36	3.35	80	15	2.14	158	7.98	59.3	264.26	19.28	4.42155
709	1	2015-8-21 10:39:45	2	38	0	0	0	0	0	0	165	62	22.7732	99	60	79	99	0.79798	66			20	14	46.1	5.06	55	236	1.28	4.56	1.2	2.64	54	15	2.73	145	7.53	57.9	114.03	21.05	4.73391
710	1	2015-8-21 10:40:05	1	48	0	0	1	0	0	Occasional	171	76	25.9909	117	80	91	99	0.919192	66			49	22	48.9	5.64	98.2	520	3.27	4.3	0.91	2.04	49	42	1.67	150	3.55	51.5	393.29	17.52	4.39168
711	1	2015-8-21 10:40:15	1	32	0	0	0	0	0	0	163	64	24.0882	114	85	80	95	0.842105	72			54	35	53.1	5.36	99	508	1.85	4.93	1.17	2.87	114	35	3.54	174	8.2	63.1	151.31	11.84	2.82055
712	1	2015-8-21 10:40:32	1	56	0	1	1	0	Occasional	often	169	79	27.6601	133	80	92	100	0.92	60	0.72	2.595	36	32	48.4	5.42	104	479	3.94	5.82	1.31	2.89	61	45	9.68	166	6.18	52.5	502.71	13.95	3.3604
713	1	2015-8-21 10:40:41	1	53	0	0	0	0	0	often	166	76	27.5802	132	100	99	96	1.03125	90	-2.31	-0.508	55	35	46.9	5.46	88.3	420	5.1	5.15	1.05	2.06	83	225	5.41	162	8.19	59.7	564.65	36.31	8.81123
714	1	2015-8-21 10:41:14	2	52	0	0	1	0	0	0	162	68	25.9107	108	68	89	98	0.908163	60	0.773	1.916	35	34	49.6	4.92	78	297	1.34	4.32	2	1.75	80	13	5.02	143	4.3	60.2	119.46	12.1	2.64587
715	1	2015-8-21 10:42:55	1	48	1	1	1	0	11yrs，30/day	Occasional	164	74	27.5134	140	90	88	94	0.93617	78	0.071	1.734	47	32	46.3	12.99	98	530	2.19	1.9	0.64	0.54	60	58	2.11	169	3.8	52.4	106.06	13.56	7.82864
716	1	2015-8-21 10:42:58	1	30	0	0	1	0	0	Occasional	170	73	25.2595	125	81	81	97	0.835052	70			26	21	50.6	4.83	71	383	1.72	4.3	1.14	2.45	83	43	4.03	178	7.58	68.6	148.78	14.93	3.20497
717	1	2015-8-21 10:43:01	2	69	0	0	0	0	0	0	157	67	27.1816	147	72	92	93	0.989247	70	-0.091	2.176	17	27	47.8	9.88	71	347	2.31	5.91	2.07	2.98	71	28	5.78	154	6.03	52.9	266.32	14.53	6.38028
718	1	2015-8-21 10:43:58	1	36	0	0	1	0	0	Occasional	174	73	24.1115	128	86	85	97	0.876289	72			58	31	48.4	6.12	99.5	468	1.39	6.08	1.21	3.97	75	80	7.22	163	8.78	60.6	391.23	19.76	5.37472
719	1	2015-8-21 10:44:22	1	38	1	0	1	0	0	Occasional	156	65	26.7094	152	102	89	97	0.917526	72			33	31	47.1	5.47	80	433	1.68	5.35	1.95	2.61	84	65	2.7	162	7.7	38.4	117.83	9.73	2.36547
720	1	2015-8-21 10:44:24	1	26	1	0	0	0	5yrs, 30/day	Occasional	171	81	27.7008	113	79	88	100	0.88	72			26	20	47.1	5.36	85.1	477	1.73	4.06	0.88	2.29	75	28	2.09	153	10.72	48.5	88.14	26.46	6.30336
721	1	2015-8-21 10:44:41	1	45	1	0	0	0	Occasional	Occasional	167	72	25.8166	98	66	92	94	0.978723	72	0.305	1.87	34	28	44.4	7.85	84	359	4.48	5.44	1.23	2.49	66	66	2.91	190	5.76	55.7	437.23	5.94	2.0724
722	1	2015-8-21 10:44:46	1	38	0	0	1	0	0	Occasional	169	69	24.1588	111	72	80	92	0.869565	72			28	23	51	5.43	77.3	336	1.45	3.52	0.86	2.02	76	10	1.91	170	6.02	61.1	96.96	20.75	5.00767
723	1	2015-8-21 10:45:50	2	35	1	0	1	0	0	0	160	64	25	132	83	81	97	0.835052	96			95	60	45.6	15.42	58.7	307	2.32	5.15	1.13	2.96	92	57	2.41	119	11.15	64.8	17.52	25.07	17.1813
724	1	2015-8-21 10:45:56	1	53	1	0	1	0	31yrs, 10/day	Occasional	171	79	27.0169	142	86	88	99	0.888889	82			34	31	45.4	5.89	83.3	389	4.59	5.34	1.01	2.45	49	43	1.9	164	7.67	59.8	421.39	12.81	3.35337
725	1	2015-8-21 10:46:02	1	37	1	0	1	1	0	Occasional	164	65	24.1672	123	81	82	92	0.891304	76	-1.997	-0.752	109	57	47.1	5.92	102.6	475	1.77	5.2	1.1	3.2	103	79	6.77	165	7.51	44.3	464.16	9.54	2.51008
726	1	42237.5	2	28	0	0	1	0	0	0	151	55	24.1217	140	95	74	96	0.770833	90	-0.35	-0.205	110	84	48.5	4.76	54	357	2.42	5.04	1.48	2.48	81	31	2.87	142	8.42	62.7	78.61	11.08	2.34404
727	1	2015-8-22 9:15:07	1	46	0	0	1	0	27yrs, 20/day	often	171	83	28.3848	107	75	92	104	0.884615	55	-0.425	1.174	84	69	46	4.4	83	409	1.85	5.82	1.29	3.55	82	151	7.73	177	11.11	65.5	324.75	6.09	1.19093
728	1	2015-8-22 9:37:21	1	27	0	0	0	0	Occasional	often	164	74	27.5134	116	84	87	99	0.878788	100			97	49	45.7	5.6	76	435	1.83	3.87	0.99	2.03	71	57	3.83	161	6.46	65	114.65	21.54	5.36107
729	1	2015-8-22 10:57:17	2	76	0	0	0	0	0	0			#DIV/0!					#DIV/0!	70	-2.074	0.679	16	20	45.7	7.52	51	287	1.2	6.19	1.7	3.76	62	37	2.43	142	5.21	55.4	275.64	12.52	4.18446
730	1	2015-8-22 10:15:57	2	34	1	0	0	0	0	0	159	65	25.711	100	68	89	94	0.946809	66			23	20	45.8	4.76	60.2	317	1.43	2.97	0.98	1.39	83	22	3.34	129	10.49	70.6	83.13	10.62	2.24672
731	1	2015-8-22 10:50:59	1	30	0	1	0	0	10yrs, 7/day	Occasional	179	82	25.5922	106	71	96	101	0.950495	75	-2.512	-1.655	38	26	47.3	5.75	67	515	2.47	6.33	1.43	3.73	83	73	2.27	127	7.77	52.9	462.57	26.29	6.71856
732	1	2015-8-22 9:54:40	1	31	0	0	1	0	0	Occasional	163	73	27.4756	117	74	87	100	0.87	84			69	47	49.8	4.79	83	329	0.8	4.19	1.37	2.378	76	50	3.22	152	6.19	45.8	151.89	14.74	3.13798
733	1	2015-8-22 9:41:15	1	41	0	1	1	0	20yrs, 10/day	0	168	80	28.3447	120	80	96	100	0.96	72	1.045	2.463	36	25	47.7	4.8	83.9	637	14.16	7.97	0.71	1.1	74	55	2.64	142	7.08	61.3	811.09	14.25	3.04
734	1	2015-8-22 10:50:54	1	49	0	0	0	0	28yrs,20-40/day	often	171	72	24.623	107	67	91	94	0.968085	60	-1.529	0.163	27	25	47.9	5.26	88.3	472	1.44	3.74	1.06	2.06	116	35	1.84	154	8	47.3	158.53	9.52	2.22556
735	1	2015-8-22 10:21:11	1	23	0	0	0	0	7yrs, 3/day	Occasional	172	82	27.7177	115	70	97	107	0.906542	70			64	36	53.4	5.29	86	458	2.12	5.51	1.44	3.2	95	161	3.46	171	8.84	51.5	530.69	21.63	5.08545
736	1	2015-8-22 10:56:31	2	62	0	0	0	0	0	0			#DIV/0!					#DIV/0!	78	-2.333	-0.549	38	31	45.8	5	63	464	3.49	6.36	1.56	3.51	92	24	3.48	138	6.31	56.2	240.79	7.65	1.7
737	1	2015-8-22 8:39:57	1	29	0	0	1	0	0	0	166	66	23.9512	114	73	80	97	0.824742	72			24	26	47.5	4.58	90	438	1.19	4.14	1.26	2.37	75	17	1.31	156	7.58	55.6	72.04	11.52	2.34496
738	1	2015-8-22 10:18:54	1	63	1	0	0	0	0	0	164	70	26.0262	132	87	89	97	0.917526	72	-0.12	1.902	51	42	49.3	5.59	95	461	5.83	5.53	1.08	2.12	89	31	4.81	170	6.24	62.2	135.85	10.34	2.56892
739	1	2015-8-22 10:53:23	1	30	0	0	0	1	0	Occasional			#DIV/0!					#DIV/0!	60			17	20	52.1	4.17	72	331	0.83	4.14	1.47	2.24	69	17	2.61	165	4.91	59.1	98.43	11.48	2.12763
740	1	2015-8-22 8:39:44	1	78	1	0	0	0	20yrs, 6/day	0	164	72	26.7698	115	69	99	102	0.970588	76	0.516	2.77	86	64	46.8	7.78	145.3	596	1.42	5.43	1.45	3.19	84	32	7.06	172	5.42	47.5	77.85	26.94	9.31525
741	1	2015-8-22 10:53:13	1	34	0	0	0	0	11yrs, 20/day	Occasional	158	84	33.6485	146	91	101	104	0.971154	78			48	33	49.8	4.59	64	451	1.58	4.8	1.15	2.88	74	112	3.45	171	5.85	54.2	638.42	23.84	4.86336
742	1	2015-8-22 9:14:19	1	31	0	0	0	0	Occasional	Occasional	168	83	29.4076	122	73	100	105	0.952381	72	-0.799	0.121	94	43	48.9	4.71	79.8	519	1.65	4.52	1.22	2.56	79	27	2.31	167	5.01	49.5	158.53	14.32	2.99765
743	1	2015-8-22 9:34:17	1	39	0	0	0	0	10yrs, 10/day	0	171	80	27.3588	112	71	93	99	0.939394	56	-0.014	1.321	60	29	49.2	4.84	71	465	1.87	4.88	1.36	2.69	60	44	7.26	158	6.42	43.7	157.05	20.66	4.4442
744	1	2015-8-22 10:59:06	2	42	0	0	0	0	0	0	157	55	22.3133	124	76	72	90	0.8	72	0.045	0.662	47	36	46.4	4.69	64	231	2.34	5.23	1.28	3.01	91	29	1.73	137	7.79	64	37.59	8.74	1.8218
745	1	2015-8-22 10:59:19	2	49	0	0	1	0	0	Occasional	158	61	24.4352	111	68	77	92	0.836957	72	3.269	4.24	55	31	49	6.4	54	311	3.22	5.32	1.28	2.78	65	29	4.54	156	6.75	72.4	135.3	6.95	1.97689
746	1	2015-8-22 9:17:47	1	39									#DIV/0!					#DIV/0!		-0.274	1.061	111	57	50.7	4.52	80	449	3.82	3.69	0.66	1.64	70	47	2.91	164	5.37	63.7	272.48	8.74	1.75577
747	1	2015-8-22 10:51:54	1	47	0	0	0	0	30yrs, 20/day	Occasional	174	90	29.7265	134	92	102	105	0.971429	72	-1.39	0.241	22	18	50.6	5.29	70	517	3.52	4.8	1	2.48	105	47	4.53	175	8.65	65.2	364.36	16.83	3.95692
748	1	2015-8-22 9:38:44	1	26	0	0	1	0	5yrs, 6/day	Occasional	165	77	28.2828	114	72	86	103	0.834951	60			101	47	52.8	4.66	83	521	3.01	5.41	1.04	3.05	70	68	4.08	152	6.79	57.6	149.68	10.21	2.1146
749	1	2015-8-22 10:55:40	2	61	1	0	1	0	0	0	153	63	26.9127	134	83	88	95	0.926316	84	0.046	1.761	21	24	44.6	5.79	54	359	2.81	5.44	1.21	3.15	68	27	3.93	145	6.06	55.3	269.31	11.72	3.01595
750	1	2015-8-22 10:12:09	2	46	0	0	1	0	0	0	155	57	23.7253	119	71	82	92	0.891304	72	-0.336	0.475	24	26	46.8	4.58	52	342	2.6	5.26	1.67	2.64	94	22	4.36	134	5.91	62	37.01	10.19	2.07423
751	1	2015-8-22 10:34:16	1	41	1	0	0	0	0	Occasional	168	65	23.03	127	91	85	95	0.894737	72	1.251	2.669	53	32	53.1	5.29	71	453	4.23	5.84	1.23	3.06	55	81	2.86	156	6.48	51.4	516.44	16.91	3.97573
752	1	2015-8-22 10:53:35	1	28	0	0	0	0	0	Occasional	168	75	26.5731	115	77	93	102	0.911765	66	0.859	1.578	141	65	53.6	3.73	84	413	1.9	5.1	1.2	3.2	72	112	2.53	170	5.12	54.7	541.78	10.64	1.76388
753	1	2015-8-22 8:28:03	1	33	0	0	0	0	0	0	169	80	28.0102	125	79	93	103	0.902913	70			31	33	50	4.23	80	551	0.99	3.82	1.55	1.79	79	28	1.51	151	5.88	42.4	226.53	7.9	1.4852
754	1	2015-8-22 10:52:27	1	25	0	1	0	0	0	Occasional	170	73	25.2595	112	62	83	103	0.805825	60			23	25	48.9	3.81	97.5	378	1.98	4.29	1.08	2.35	82	14	1.65	165	6.91	66	84.61	10.74	1.81864
755	1	2015-8-22 10:17:15	1	81	1	0	0	0	40yrs, 20/day	Occasional	160	82	32.0312	134	73	111	106	1.04717	100			48	29	43.7	6.88	126.9	429	3.22	6.79	1.41	3.91	107	38	4.19	139	8.38	66.5	275.64	15.35	4.69369
756	1	2015-8-22 10:33:07	1	34	0	0	1	0	0	Occasional	158	79	31.6456	120	93	95	101	0.940594	62			73	45	51.3	5.07	66	436	4.48	5.61	0.98	3.14	108	53	2.86	162	7.41	50	321.58	16.09	3.62561
757	1	2015-8-22 10:19:15	1	27	0	1	0	0	0	Occasional	168	72	25.5102	109	75	91	100	0.91	74			62	30	47	4.28	100.3	453	2.07	5.05	0.99	3.01	82	59	2.69	177	8.42	57.1	361.19	14.09	2.68023
758	1	2015-8-22 9:24:19	1	44	0	0	0	0	0	often	174	84	27.7447	107	69	97	100	0.97	60	-0.032	1.499	68	46	46.6	6.28	73.9	416	2.95	6.03	1.02	3.57	105	453	4.63	165	6.75	58.6	537.03	12.7	3.54471
759	1	2015-8-22 10:57:32	2	60	0	0	0	0	0	0	151	53	23.2446	134	84	76	86	0.883721	90	1.027	2.676	52	36	49.2	5.28	53	310	1.41	7.07	2.02	4.1	78	89	4.89	136	4.45	53.1	237.62	10.2	2.3936
760	1	2015-8-22 8:39:08	1	81	1	0	0	0	52yrs, 20/day	0	161	88	33.9493	159	73	116	108	1.07407	66			24	30	45.6	5.73	114.9	465	1.79	4.16	0.96	2.33	69	25	6.67	162	6.48	66.5	435.64	13.44	3.42272
761	1	2015-8-22 10:21:49	1	47	1	0	1	0	22yrs, 10/day	0	175	80	26.1224	112	83	94	104	0.903846	76	-1.278	0.353	30	23	43.6	9.02	93.3	483	2.75	5.26	0.93	3.15	96	18	5.86	163	5.72	58.9	643.17	23.71	9.50508
762	1	2015-8-22 8:23:26	1	51	0	0	1	0	24yrs, 20/day	0	162	74	28.1969	132	75	93	95	0.978947	60	0.089	1.838	23	24	49.4	5.45	69	347	2.92	5.56	1.26	3.18	78	31	3.09	164	6.35	60.2	324.75	11.31	2.73953
763	1	2015-8-22 9:39:28	1	30	0	0	0	0	Occasional	Occasional	168	86	30.4705	126	72	104	108	0.962963	70			67	32	50.3	5.77	69.8	387	1.24	6.42	0.96	4.45	84	52	2.02	146	6.94	64.8	530.69	23.78	6.09825
764	1	2015-8-22 9:31:42	1	44	1	0	0	0	29yrs, 20/day	Occasional	178	85	26.8274	154	95	98	103	0.951456	60	-0.005	1.525	14	18	47.2	6.08	88	451	2.47	4.62	1.16	2.43	58	35	4.26	149	8.44	65.4	38.2	10.24	2.76708
765	1	2015-8-22 10:23:10	1	63	0	0	0	0	0	Occasional	179	64	19.9744	111	67	82	87	0.942529	72	-1.294	0.728	50	28	48.9	8.59	75	374	1.94	4.41	1.69	2.1	46	111	3.87	135	5.74	71.4	272.48	12.39	4.73023
766	1	2015-8-22 10:51:43	1	33	0	0	0	0	0	0	170	75	25.9516	141	88	92	101	0.910891	90	0.948	1.987	54	31	49.2	4.65	74	417	2.1	5.02	1.28	2.86	75	57	5	159	7.7	48.5	119.63	9.92	2.05013
767	1	2015-8-22 10:21:23	1	29	0	0	1	0	0	Occasional	165	67	24.6097	124	77	83	95	0.873684	70			37	24	52.2	4.83	74	425	2.23	5.77	0.99	3.65	94	32	2.74	162	7.33	58.8	150.05	9.17	1.96849
768	1	2015-8-22 8:52:06	1	65	1	0	0	0	25yrs, 20/day	100g/day	164	83	30.8596	168	88	104	105	0.990476	66	-2.358	-0.299	49	43	46.8	7.8	89.5	493	3.88	5.47	1.31	2.76	64	75	4.81	147	8.01	54.9	315.25	16.2	5.616
769	1	2015-8-22 10:51:38	1	47	0	0	0	0	19yrs, 20/day	Occasional	159	68	26.8977	109	73	89	97	0.917526	84	0.585	2.216	29	22	47.2	4.72	73	343	2.17	5.16	0.98	3.26	73	70	2.81	164	9.23	68.7	183.76	12.43	2.60754
770	1	2015-8-22 10:09:26	1	28	0	0	0	0	0	0	171	80	27.3588	139	90	90	103	0.873786	76	-2.477	-1.758	209	101	48.5	4.4	87.6	447	3.68	5.32	0.85	2.82	84	71	2.4	176	5.71	56.2	275.64	28.83	5.63787
771	1	2015-8-22 9:42:15	1	49	0	0	1	0	10yrs	Occasional	164	66	24.539	115	68	83	93	0.892473	80	-0.666	1.026	48	30	49.1	4.38	77.8	405	1.06	4.8	1.73	2.5	96	27	3.65	160	7.46	70	153	8.99	1.75005
772	1	2015-8-22 10:16:59	1	34	0	0	1	0	0	Occasional	164	62	23.0518	116	82	84	95	0.884211	70			35	29	48.2	4.61	70	375	1.48	5.34	1.5	3.1	50	21	1.66	150	5.25	57.1	72.8	11.25	2.305
773	1	2015-8-22 9:20:50	1	32	0	0	1	0	0	Occasional	157	66	26.7759	148	93	86	96	0.895833	86			26	19	48.2	4.27	62	388	1.28	4.83	1.72	2.48	98	16	2.86	163	5.05	48.9	126.27	13.9	2.63791
774	1	2015-8-22 10:53:07	1	29	1	0	1	0	0	Occasional	164	69	25.6544	124	80	85	100	0.85	76			49	31	47	4.96	85.5	310	2.65	5.78	1.16	3.4	64	30	3	166	7.7	56.5	236.04	13.08	2.88341
775	1	2015-8-22 8:14:27	1	57	1	0	0	0	40yrs, 20/day	40yrs, 150g/day	165	78	28.6501	139	90	98	105	0.933333	70	0.421	2.32	38	33	49	4.67	93	350	1.63	4.14	1.41	1.99	43	37	3.72	156	7.23	77.1	153.18	11.83	2.45538
776	1	2015-8-22 10:22:58	1	28	0	0	0	0	0	often			#DIV/0!					#DIV/0!	72			160	66	40.7	5.26	72	473	0.9	5.8	1.41	3.55	69	55	1.79	172	7.83	57.2	472.08	25.91	6.05718
777	1	2015-8-22 8:36:04	1	78	1	0	0	0	0	Occasional	167	72	25.8166	166	84	101	98	1.03061	72	-2.55	-0.295	21	32	48.5	7.4	101	336	0.86	5.7	1.84	3.27	83	58	2.97	184	6.42	56	80.92	15.77	5.18658
778	1	2015-8-22 10:55:49	2	76	1	0	0	0	0	0	144	42	20.2546	125	64	88	87	1.01149	78	-2.667	0.087	23	35	44.7	5.53	82.8	302	1.4	5.75	1.87	3.16	36	14	5.49	133	5.55	62.4	77.98	12.9	3.17053
779	1	2015-8-22 9:26:44	1	40									#DIV/0!					#DIV/0!		-0.833	0.544	52	30	46.2	4.78	71.9	367	3.32	4.82	0.94	2.44	133	80	4.24	155	5.57	58.3	91.8	14.04	2.98272
780	1	2015-8-22 9:48:35	1	45	1	0	0	0	30yrs, 20/day	Occasional	167	75	26.8923	122	93	91	95	0.957895	75	-0.079	1.487	15	15	49.4	4.71	93	562	2.38	4.93	1.07	2.91	112	21	3.58	165	8.59	69.2	144.15	7.87	1.64745
781	1	2015-8-22 10:56:26	2	29	0	0	0	0	0	0	158	54	21.6311	118	76	72	93	0.774194	73			44	43	48.4	4.62	65.8	355	1.18	4.94	1.55	2.69	88	144	2.18	137	7.54	56.9	44.04	14.7	3.0184
782	1	2015-8-22 10:33:11	1	25	0	0	1	0	4yrs, 20/day	often	177	84	26.8122	132	77	92	106	0.867925	60	1.158	1.643	48	23	47.4	4.72	90	369	1.1	3.2	1.01	1.67	64	39	1.8	153	6.56	52.1	148.94	18.93	3.97109
783	1	2015-8-22 10:12:50	2	75	0	0	0	0	0	0	153	64	27.3399	138	72	95	91	1.04396	84	0.057	2.742	40	38	45.9	8.5	49	314	1.32	5.65	1.63	3.26	107	89	5.35	147	6.4	62.5	204.36	25.2	9.52
784	1	2015-8-22 10:51:14	1	34	0	0	0	1	10yrs, 10/day	Occasional	171	75	25.6489	115	75	84	95	0.884211	76	0.817	1.911	99	46	51.7	5.15	87	375	0.72	4	1.4	2.16	86	19	2.86	154	4.61	44	149.68	13.71	3.13807
785	1	2015-8-22 9:07:08	1	28	0	0	0	0	0	0	170	71	24.5675	127	89	78	98	0.795918	72			157	77	47.6	3.98	84.7	537	2.35	5.68	1.2	3.52	86	74	5.2	168	8.19	58.7	460.99	14.01	2.47821
786	1	2015-8-22 10:16:50	2	22	0	0	1	0	0	0	156	60	24.6548	94	65	84	91	0.923077	78			52	31	44.5	4.55	43	287	1.66	4.67	1.39	2.4	81	50	3.49	122	7.59	58.2	76.15	18.72	3.7856
787	1	2015-8-22 10:17:07	1	78	1	0	0	1	0	0	165	79	29.0174	163	77	103	103	1	66	-0.876	1.379	46	38	45.1	5.52	91.9	560	1.85	5.68	0.93	3.76	70	28	2.03	174	6.76	52.8	369.11	15.7	3.85173
788	1	2015-8-22 10:16:04	1	67	1	0	0	1	0	Occasional	160	65	25.3906	156	88	94	89	1.05618	82	-1.374	0.72	45	43	43.6	20.07	93.8	476	2.2	6.43	1.75	3.77	85	92	4.02	160	6.59	55.9	147.1	14.96	13.3443
789	1	2015-8-22 9:56:32	1	24	0	0	0	0	Occasional	Occasional	175	83	27.102	140	89	92	107	0.859813	72			60	41	52.3	4.56	88	415	0.75	5.21	1.34	3.21	80	40	4.42	174	7.1	65.6	202.77	14.26	2.89003
790	1	2015-8-22 10:16:57	2	49	0	0	1	0	0	0	160	64	25	101	74	78	95	0.821053	72	1.842	2.813	10	17	46.6	4.7	59	331	0.93	4.52	1.81	2.33	69	14	2.22	149	5.61	59.5	52.51	11.71	2.44609
791	1	2015-8-22 10:52:44	1	33	0	0	1	0	Occasional	Occasional	161	65	25.0762	135	81	87	97	0.896907	72			34	28	49.3	5.36	88.2	378	1.84	4.97	1.31	2.8	61	16	2.43	158	6.73	44.4	399.21	16.82	4.0069
792	1	2015-8-22 10:51:32	1	41	0	0	0	0	14yrs, 20-30/day	0	166	65	23.5883	114	69	86	93	0.924731	60	-0.441	-0.023	44	26	45.9	4.64	67	333	1.67	5.68	0.97	3.66	69	28	3.74	172	6.42	59.4	155.76	9.71	2.00242
793	1	2015-8-22 9:37:05	1	34	0	1	1	0	6yrs, 20/day	0	174	76	25.1024	118	72	90	99	0.909091	76			19	19	48.6	4.88	66	395	2.54	4.23	1.07	2.29	92	29	2.4	150	6.25	59.4	224.95	8.9	1.93031
794	1	2015-8-22 9:26:11	1	31	0	0	0	0	0	0			#DIV/0!	114	73			#DIV/0!	60			120	56	50.7	4.5	101.7	480	2.54	6.08	1.25	3.56	76	51	1.82	171	8.07	50	147.1	14.91	2.982
795	1	2015-8-22 10:58:01	2	74	1	0	1	1	0	0	155	52	21.6441	122	78	82	89	0.921348	84	-2.485	0.13	33	48	48.6	4.77	60	366	1.33	4.61	2.26	2.03	54	26	4.83	131	7.46	55.6	524.36	12.13	2.57156
796	1	2015-8-22 9:14:11	1	73	1	0	0	0	41yrs, 20/day	33yrs, 25g/day	160	69	26.9531	128	79	84	101	0.831683	66	-1.004	1.183	16	22	49.8	5.08	106	244	0.98	5.14	2.29	2.46	55	39	6.19	168	6.83	56.2	126.64	14.74	3.32796
797	1	2015-8-22 8:54:30	1	37	0	0	0	0	12yrs, 5/day	often	173	69	23.0546	128	85	90	101	0.891089	66	0.351	1.596	21	27	49.3	4.82	84	328	1.94	5.61	1.65	3.11	80	29	3.75	163	5.44	50.3	275.64	12.52	2.68206
798	1	2015-8-22 10:55:44	2	75	1	0	0	0	0	0	151	50	21.9289	123	60	80	87	0.91954	72	-0.621	2.063	20	24	44.5	4.66	92	432	1.39	5.44	1.14	3.4	75	24	3.15	130	5.26	47.9	129.4	11.39	2.359
799	1	2015-8-22 9:01:35	1	77	0	0	0	1	56yrs, 20/day	36yrs, 50g/day	166	75	27.2173	116	76	99	103	0.961165	72	-1.498	0.744	16	17	45.6	5.18	59	348	1.36	5.51	1.15	3.57	62	22	5.96	161	5.77	49	151.89	11.59	2.66828
800	1	2015-8-22 8:41:23	1	32	0	0	0	0	0	Occasional	157	65	26.3702	122	80	83	94	0.882979	76			117	55	50.7	4.87	90	675	2.41	5.42	1.29	3.07	70	34	2.35	148	7.4	51.7	378.61	13.2	2.85707
801	1	2015-8-22 10:19:47	1	28	0	0	0	0	4yrs, 10/day	Occasional	175	72	23.5102	122	74	85	100	0.85	66			65	32	46.4	4.9	98.7	294	1.37	4.6	1.27	2.64	68	20	2.19	157	4.99	49.3	196.44	18.11	3.94396
802	1	2015-8-22 9:38:28	1	33	0	0	1	1	0	Occasional	176	77	24.858	117	80	95	107	0.88785	60	-2.18	-1.141	40	31	49.5	5.72	70	408	1.34	4.84	1.35	2.79	94	19	4.38	156	5.19	57.6	413.47	15.03	3.82096
803	1	2015-8-22 10:49:57	2	32	0	0	1	0	0	0	159	64	25.3155	135	80	81	93	0.870968	84			17	22	47.1	5.4	58	370	4.55	4.92	1.29	2.34	70	25	1.76	129	7.07	44.3	76.08	13.44	3.2256
804	1	2015-8-22 10:13:25	2	79	1	0	0	0	0	0	154	58	24.4561	152	76	82	87	0.942529	120	-1.567	1.392	14	22	49	6.26	71	445	1.79	6.13	1.17	4.08	46	27	2.75	131	5.04	51.2	48.91	6.48	1.80288
805	1	2015-8-24 9:03:46	1	51	1	1	0	0	27yrs, 20/day	Occasional	167	69	24.7409	103	65	85	97	0.876289	78	-1.821	-0.072	21	23	47.6	5.19	78	304	1.98	4.83	1.14	2.84	96	53	4.71	162	5.53	67.6	70.14	5.24	1.20869
806	1	2015-8-24 9:44:59	1	51	1	0	0	1	0	Occasional	156	76	31.2295	120	69	100	102	0.980392	68	-1.293	0.456	24	22	46.3	6	83	498	8.12	5.24	0.71	1.27	51	16	2.87	149	5.88	64.1	316.83	18.71	4.98933
807	1	2015-8-24 10:35:11	1	53	0	0	1	0	20yrs, 20/day	Occasional	169	76	26.6097	110	63	90	98	0.918367	76			76	46	46.7	5.47	79.9	464	2.04	4.97	1.13	3.02	109	56	4.42	158	5.84	56.5	161.58	12.01	2.91976
808	1	2015-8-24 9:17:23	1	55	0	0	1	0	0	Occasional	171	76	25.9909	140	77	87	99	0.878788	80	-0.761	1.091	93	50	47.7	8.19	83	326	2.03	4.76	1.01	2.79	60	50	3.93	139	7.21	55.7	608.32	20.73	7.54572
809	1	2015-8-24 11:07:44	1	34	0	0	1	0	0	often	168	84	29.7619	121	90	102	102	1	76			64	42	48.8	4.79	72	602	3.62	4.42	1.27	2.18	76	89	3.17	170	7.37	51	486.34	10.21	2.1736
810	1	2015-8-24 10:46:15	1	34	1	0	1	0	0	Occasional	171	80	27.3588	114	74	83	96	0.864583	76	3.379	4.472	19	23	49.6	5.26	97	443	0.82	3.97	1.63	2.02	84	21	1.24	138	4.87	40.9	120.18	10.01	2.34012
811	1	2015-8-24 9:23:13	2	29	1	0	0	0	0	0	163	60	22.5827	117	72	84	95	0.884211	72			15	18	52.2	4.31	57	233	2.08	3.93	1.18	2.06	91	19	6.53	129	5.53	56.1	144.81	18.05	3.45758
812	1	2015-8-24 10:37:17	2	58	0	0	0	0	0	0	162	63	24.0055	138	80	82	92	0.891304	78	-2.764	-1.247	60	36	47.6	5.51	56	349	1.8	5.68	1.57	3.37	113	99	5.47	135	5.09	44.3	252.53	16.08	3.93781
813	1	2015-8-24 10:33:43	1	30	0	1	0	0	9yrs, 20/day	Occasional	178	100	31.5617	142	92	100	106	0.943396	70			17	13	44.4	4.68	82.7	393	2.58	5.55	1.17	3.27	80	27	3.37	140	7.12	44.4	200.96	15.82	3.29056
814	1	2015-8-24 9:21:20	2	52	1	0	1	0	0	0	160	55	21.4844	128	82	72	86	0.837209	66	0.193	1.336	48	34	50.3	5.4	69	373	2.11	5.02	1.22	3.02	87	26	1.89	129	5.46	53.4	65.83	15.49	3.7176
815	1	2015-8-24 9:59:12	2	74	1	1	1	0	0	0	148	55	25.1096	142	85	90	92	0.978261	70	-3.074	-0.459	13	18	43.5	6.05	82	533	2.14	4.81	1.25	2.56	114	24	3.47	140	5.15	64.4	128.61	11.96	3.21591
816	1	2015-8-24 10:56:31	2	49	0	0	1	0	0	0	155	57	23.7253	96	65	74	91	0.813187	78	1.112	2.083	38	30	47	4.75	54	353	4.91	5.33	1.09	2.28	51	29	4.12	130	5.76	57.8	100.25	12.19	2.57344
817	1	2015-8-24 10:43:03	1	36	0	0	1	0	0	Occasional	167	84	30.1194	107	69	93	100	0.93	76	-2.236	-1.039	29	21	47.7	4.44	104	456	2.24	5.83	1.32	3.5	77	44	2.36	165	6.48	54.9	243.86	11.77	2.32261
818	1	2015-8-24 11:07:15	1	40	0	0	1	1	0	0	170	74	25.6055	122	81	88	96	0.916667	80	-0.781	0.597	27	29	44.4	4.32	88	388	1.09	4.22	1.05	2.48	68	12	4.55	161	7.01	61.7	225.06	8.86	1.70112
819	1	2015-8-24 10:53:24	2	49	0	0	1	0	0	0	156	60	24.6548	91	64	78	92	0.847826	70	1.757	2.728	44	32	43.9	5.31	62.3	254	0.86	4.74	1.49	2.67	56	12	5.73	136	4.78	47.1	266.51	15.2	3.5872
820	1	2015-8-24 9:41:48	1	50	0	0	1	0	Occasional	Occasional	170	70	24.2215	121	78	91	99	0.919192	74	0.159	1.88	35	30	44.9	4.96	88	414	8.18	6.07	0.65	1.37	106	27	3.29	145	4.22	66.6	206.27	10.23	2.25515
821	1	2015-8-24 10:29:34	1	57	0	0	0	0	23yrs, 7/day		165	69	25.3444	157	101	88	97	0.907216	80	-2.127	-0.229	23	29	43.5	6.5	80	456	2.92	5.85	1.47	3.28	68	52	6.07	162	6.74	54.4	233.25	16.5	4.76667
822	1	2015-8-24 10:58:27	1	28	0	0	1	0	7yrs, 10/day	Occasional	170	85	29.4118	141	103	101	102	0.990196	92			52	32	49.9	4.87	96	522	4.2	5.91	1.04	3.29	95	111	4.22	160	10.57	46	312.77	35.61	7.70759
823	1	2015-8-24 9:51:18	2	52	0	0	1	0	0	Occasional	159	76	30.0621	140	82	96	104	0.923077	84	0.387	1.53	94	82	43.4	6.58	68.3	519	2.52	5.91	1.17	3.6	151	263	2.58	143	8.41	54.3	255.42	18.58	5.43362
824	1	2015-8-24 10:59:38	2	52	1	0	1	0	0	0	160	57	22.2656	119	80	74	91	0.813187	72			31	23	47.9	6.77	81.3	407	2.16	5.81	1.32	3.37	113	112	4.36	136	6.27	54	200.96	10.76	3.23756
825	1	2015-8-24 9:25:22	2	50	0	0	0	0	0	0	166	82	29.7576	118	77	100	105	0.952381	76	3.468	4.495	20	20	41.7	4.9	61	296	2.08	4.9	1.12	3.04	44	12	1.4	131	6.77	55.5	102.28	12.29	2.67649
826	1	2015-8-24 10:43:25	1	33	0	0	0	0	8yrs, 10/day	Occasional	170	84	29.0657	118	74	91	98	0.928571	78	0.473	1.512	88	43	46.9	5.52	77	332	2.71	4.39	0.82	2.4	95	57	4.2	154	6.79	65.6	238.55	18.32	4.49451
827	1	2015-8-24 10:57:54	1	32	0	0	1	0	14yrs, 10/day	Occasional	172	92	31.0979	129	80	92	106	0.867925	68	-0.334	0.647	57	33	45	4.72	101	439	7.63	6.2	0.75	1.83	84	155	2.86	160	10.3	53.5	106.33	17.41	3.65223
828	1	2015-8-24 10:37:07	1	48	1	0	0	0	31yrs, 20/day	0	154	63	26.5643	99	72	82	92	0.891304	82			19	20	44.9	4.76	109.3	345	2.32	5.32	1.03	3.19	75	17	7.03	169	8.79	57.6	227.47	11.66	2.46674
829	1	2015-8-24 9:13:51	2	37	0	0	1	0	0	0	162	70	26.6728	112	76	78	101	0.772277	96			19	21	50.5	4.89	66	333	1.18	4.58	1.55	2.51	79	16	2.26	129	6.63	59.1	50.23	16.35	3.5534
830	1	2015-8-24 10:45:52	1	47	0	0	0	0	0	0	160	76	29.6875	137	90	97	103	0.941748	72	1.688	3.319	58	41	48.1	5.36	71	458	2.05	4.97	1.55	2.69	81	71	1.84	153	6.44	54.2	146.58	16.68	3.97355
831	1	2015-8-24 10:49:35	1	36	0	0	0	0	0	often	167	87	31.1951	155	98	104	107	0.971963	85			42	35	49	6.16	59	566	5.57	6.84	1.49	3.7	62	164	4.05	167	5.03	56.9	358.55	17.8	4.87324
832	1	2015-8-24 10:58:10	2	27	0	0	1	0	0	0	150	58	25.7778	93	69	80	96	0.833333	78			47	48	44.7	4.91	53	246	2.5	4.56	1.09	2.41	83	20	4.92	131	6.55	55.6	41.82	14.54	3.17295
833	1	2015-8-24 10:45:47	1	59	1	1	0	0	0	0	166	72	26.1286	141	87	94	96	0.979167	66	-2.137	-0.195	25	20	50.6	6.63	88	464	1.72	5.42	1.06	3.45	60	22	3.36	150	9	69.3	304.58	12.8	3.77173
834	1	2015-8-24 10:44:57	1	54	1	0	1	0	30yrs, 20/day	0	173	79	26.3958	116	69	89	99	0.89899	80			13	16	45.2	7.76	70.5	309	1.8	4.39	1.12	2.58	80	22	3.75	141	5.76	46.6	272.29	27.53	9.49479
835	1	2015-8-24 10:27:34	1	53	0	0	0	0	Occasional	Occasional	177	82	26.1738	156	87	92	98	0.938776	60			42	29	46.1	5.31	75.8	454	1.44	5.78	1.15	3.87	81	59	4.02	163	4.95	55.7	214.46	15.1	3.5636
836	1	2015-8-24 10:36:20	1	39	0	0	1	0	0	Occasional	179	100	31.21	121	65	94	101	0.930693	78			17	22	45.5	5.05	94.7	305	1.88	3.47	0.99	1.85	58	12	4.53	156	5.23	60	128.86	8.79	1.97287
837	1	2015-8-24 10:36:43	1	31	0	0	0	0	6yrs, 10/day	0	173	78	26.0617	121	79	89	95	0.936842	84			62	37	42.9	6.11	96.7	474	1.93	4.64	1.08	2.59	73	61	2.44	159	6.88	49.2	290.6	14.93	4.05432
838	1	2015-8-24 8:26:16	2	29	0	0	1	0	0	0	158	69	27.6398	113	74	84	101	0.831683	84			52	43	46.9	4.93	63.7	330	1.8	5.04	1.28	3.06	82	22	3.25	136	8.62	64.8	162.41	14.24	3.12014
839	1	2015-8-24 9:56:58	2	53	0	0	1	0	0	0	154	62	26.1427	124	80	81	95	0.852632	84	0.559	1.762	48	32	47.1	5.41	59	273	1.44	5.15	1.53	2.88	110	60	9.6	148	5.56	60	191.33	11.78	2.83244
840	1	2015-8-24 10:28:26	1	44	1	0	0	0	0	Occasional	172	77	26.0276	119	79	86	98	0.877551	70			30	21	47.3	10.55	60	272	0.9	4.12	1.24	2.23	59	30	42.69	169	7.56	72.6	249.64	7.84	3.67609
841	1	2015-8-24 11:08:59	2	49	0	0	1	0	0	0	146	70	32.8392	126	77	90	104	0.865385	82	1.603	2.574	19	25	44.8	5.51	74	389	2.39	4.77	1.68	2.24	68	15	3.67	131	7.9	62.2	14.96	14.84	3.63415
842	1	2015-8-24 11:08:30	1	52	0	0	1	0	0	Occasional	172	75	25.3515	121	80	87	93	0.935484	74			42	35	55.7	5.67	95	329	2.04	5.99	1.4	3.68	72	27	6.33	198	9.35	43.5	300.24	22.21	5.59692
843	1	2015-8-24 9:12:15	1	47	1	0	1	0	20yrs, 10/day		154	62	26.1427	149	81	91	95	0.957895	85	-3.52	-1.889	17	16	42.2	5.28	48	366	1.19	3.99	0.97	2.29	110	42	3.03	136	7.86	61.8	156.71	10.93	2.56491
844	1	2015-8-24 10:59:31	2	60	0	0	1	0	0	0			#DIV/0!	119	76			#DIV/0!	96	0.39	2.039	49	40	46.2	6.31	71.4	387	0.92	4.49	1.7	2.3	107	20	4.01	147	5.73	42.6	135.19	17.87	5.01154
845	1	2015-8-24 10:44:01	1	41	1	1	1	0	10yrs, 2/day	often	175	82	26.7755	123	79	91	100	0.91	68	1.091	2.509	49	28	49.4	6.36	78	494	1.48	4.81	1.36	2.81	109	131	3.29	158	6.28	62.7	293.49	13.49	3.81317
846	1	2015-8-24 8:30:20	2	23	0	0	0	0	Occasional	Occasional	171	80	27.3588	116	85	86	107	0.803738	72	2.232	2.282	15	16	47.8	5.84	61.8	373	0.91	3.71	1.36	1.87	52	26	2.47	143	9.24	63.6	57.42	40.11	10.4108
847	1	2015-8-24 10:45:58	1	39	0	0	1	0	15yrs, 20/day	Occasional	169	80	28.0102	116	72	85	96	0.885417	70	1.492	2.827	55	32	48.4	4.88	91	410	1.51	4.3	1.48	2.2	62	104	2.39	175	7.34	53.6	272.77	11.11	2.40964
848	1	2015-8-24 11:01:44	1	33	0	0	0	0	0	0	163	74	27.852	134	90	90	94	0.957447	76			62	32	44.3	5.03	89.1	621	5.11	5.74	0.88	3.09	87	85	2.83	163	7.18	53.8	318.07	15.38	3.43828
849	1	2015-8-24 10:57:55	2	26	0	0	1	0	0	0			#DIV/0!					#DIV/0!	68			32	32	44.8	4.78	78.7	346	1.28	4.71	1.33	2.81	73	22	2.12	138	8.31	66.1	99.24	23.75	5.04556
850	1	2015-8-24 8:51:35	1	66	1	0	0	0	0	0	163	73	27.4756	164	82	97	100	0.97	80			29	30	42.6	9.87	83.5	461	4.47	4.85	0.74	2.26	68	26	2.23	147	6.34	54.6	178.31	17.5	7.67667
851	1	2015-8-24 10:41:54	1	31	0	1	0	0	0	Occasional	183	92	27.4717	125	75	95	104	0.913462	80			42	35	49.6	5.26	82	612	2.43	4.42	1.02	2.47	71	26	2.28	165	7.16	67.9	326.27	9.7	2.26764
852	1	2015-8-24 10:57:29	2	29	0	1	1	1	0	0	160	59	23.0469	108	66	85	100	0.85	96			13	19	50.4	4.49	50	339	1.13	4.75	2.14	2.19	154	19	3.91	133	7.92	60.1	60	19.42	3.87537
853	1	2015-8-24 10:35:20	1	46	0	0	0	0	20yrs, 20/day	Occasional	176	83	26.7949	127	87	92	100	0.92	68			57	35	50.9	5.49	83	380	2.31	5.08	1.03	2.94	87	79	3.94	163	6.8	58.6	331.08	21.62	5.27528
854	1	2015-8-24 10:43:12	1	58	1	1	0	0	42yrs, 10/day	Occasional	160	56	21.875	131	74	77	87	0.885057	72	-0.418	1.503	26	29	45.8	12.89	74.2	279	2.5	4.64	1.57	2.3	99	50	4.56	170	5.74	35.2	263.61	17.74	10.163
855	1	2015-8-24 8:12:30	1	50	0	0	0	0	0	Occasional	161	68	26.2336	124	78	87	97	0.896907	80	-1.622	0.099	48	37	44.6	5.39	84.5	406	2.13	6.11	1.02	4.05	69	31	4.53	174	7.11	61.1	283.37	12.63	3.02559
856	1	2015-8-24 10:35:41	1	47	0	1	1	0	20yrs, 10/day	0	169	58	20.3074	105	61	80	89	0.898876	72			46	43	70.9	5.56	74.3	338	1.79	3.83	1.32	1.92	90	80	2.86	144	5.08	71.6	182.65	15.1	3.73138
857	1	2015-8-24 9:38:59	1	57	0	0	0	0	Occasional	often	156	58	23.833	154	94	85	91	0.934066	74			21	20	47	4.08	116	514	2.43	5.41	1	3.22	79	28	4.05	171	6.94	53.8	173.01	4.61	0.835947
858	1	2015-8-24 11:06:53	1	33	0	0	1	0	0	Occasional	167	79	28.3266	136	90	91	100	0.91	72			64	40	49.2	4.81	116.2	618	2.26	6.57	1.19	4.26	102	125	4.21	174	10.22	64.1	283.37	17.49	3.73897
859	1	2015-8-24 9:38:60	1	53	1	0	1	0	30yrs, 20-30/day		163	67	25.2174	113	84			#DIV/0!	74	0.499	2.302	26	20	43.2	4.74	95	547	1.38	5.7	1.17	3.62	70	20	8.95	156	8.73	61.5	207.23	15.27	3.21688
860	1	2015-8-24 10:32:11	1	60	0	0	0	0	30yrs, 20/day	often	183	89	26.5759	116	60	104	102	1.01961	50			29	29	47.4	4.8	81	554	2.72	5.26	1.55	2.7	68	51	5.39	155	4.72	55.7	276.14	12.88	2.74773
861	1	2015-8-24 10:38:06	1	30	0	0	0	0	Occasional	Occasional	180	78	24.0741	109	61	78	102	0.764706	76			30	23	29.5	5.34	90.8	412	0.72	4.82	1.45	2.91	96	15	3.55	161	7.83	59.6	206.75	21.25	5.04333
862	1	2015-8-24 11:02:06	1	39	0	0	1	0	Occasional	0	175	123	40.1633	128	85	116	122	0.95082	84	0.542	1.877	93	115	47.6	5.39	90	545	4.36	5.5	1.1	2.18	73	50	2.99	171	6.84	49.9	377.83	28.7	6.87524
863	1	2015-8-24 11:08:19	1	51	0	0	0	0	/day30yrs, 20	Occasional	178	84	26.5118	120	84	96	95	1.01053	74			19	22	43.1	4.32	98	405	3.23	5.04	1.03	2.37	83	23	5.75	149	6.73	49.3	284.34	11.66	2.23872
864	1	2015-8-24 10:22:16	1	45	1	0	1	0	0	often	171	75	25.6489	150	102	91	99	0.919192	70	-0.876	0.69	67	39	49.5	4.74	86	404	3.13	5.23	1.15	2.65	86	209	4	165	5.35	57.9	343.61	9.47	1.99501
865	1	2015-8-24 10:49:27	1	34	0	0	1	0	11yrs, 10/day	Occasional	177	84	26.8122	130	89	99	97	1.02062	92			111	67	45.1	5.51	76.6	458	2.11	6.05	1.13	3.82	126	206	4.57	164	6.2	60.5	281.93	16.93	4.14597
866	1	2015-8-24 9:21:53	1	46	1	0	1	0	Occasional	Occasional	160	63	24.6094	115	84	87	90	0.966667	72	1.522	3.121	26	24	45.6	4.79	69	425	2.89	3.6	0.89	1.61	82	15	2.07	159	4.89	55.5	221.2	14.12	3.00599
867	1	2015-8-24 9:06:37	1	60	1	0	0	0	0	often	175	80	26.1224	119	70	92	100	0.92	57	0.529	2.492	27	33	47.8	5.59	97	501	3.56	5.49	1.1	2.91	76	56	3.58	159	6.28	55	258.31	4.68	1.16272
868	1	2015-8-24 10:38:14	1	58	0	0	0	0	34yrs, 20/day	0	157	61	24.7475	138	75	86	89	0.966292	72	-0.018	1.903	19	19	46.2	4.64	65	352	1.57	4.49	1.3	2.53	75	31	4.04	160	6.17	62.9	150.13	8.66	1.78588
869	1	2015-8-24 9:47:42	2	25	0	0	1	0	0	0	158	56	22.4323	124	71	70	93	0.752688	76			13	15	48.9	5.45	56	353	0.89	3.43	1.33	1.61	58	16	2.43	129	8.53	61.3	67.73	15.82	3.83196
870	1	2015-8-24 10:32:16	1	52	0	1	1	1	0	Occasional	166	74	26.8544	103	69	91	99	0.919192	66	1.447	3.223	38	34	51.7	4.64	115	460	1.76	4.59	0.98	2.7	92	14	1.89	150	5.44	59.5	268.43	11.17	2.3035
871	1	2015-8-24 10:22:16	2	45	0	0	1	0	0	0	161	70	27.0051	112	74	84	100	0.84	74	0.063	0.823	21	21	48.1	5.26	78	374	1.94	4.89	1.49	2.62	73	13	3.59	135	5.81	75.7	42.27	16.05	3.75213
872	1	2015-8-24 10:32:51	2	38	0	0	0	0	0	Occasional	159	64	25.3155	101	69	82	96	0.854167	72			33	23	48.2	5.22	68	290	2.93	4.72	1.09	2.4	53	24	4.05	139	8.29	71.8	20.75	19.7	4.5704
873	1	2015-8-24 10:38:30	1	52	1	0	1	0	Occasional	0	165	71	26.079	118	68	87	96	0.90625	82			82	68	48.2	6.15	82	356	1.95	4.03	0.89	2.46	79	65	3.44	164	6.77	54	303.13	13.42	3.66813
874	1	2015-8-24 10:36:36	1	44	0	0	1	1	0	Occasional	175	85	27.7551	123	87	94	104	0.903846	84			30	27	50.1	4.61	72	371	2.17	4.18	1.05	2.34	90	44	6.56	160	4.86	61.1	190.36	15.79	3.2352
875	1	2015-8-24 8:59:26	1	51	0	0	1	0	0	Occasional	163	68	25.5937	120	70	94	98	0.959184	80	-1.483	0.266	60	26	49.1	6.21	82	427	1.88	4.2	1.21	2.25	65	20	6.92	155	6.24	59.2	308.43	10.16	2.80416
876	1	2015-8-24 8:55:15	1	45	0	0	1	0	0	0	173	82	27.3982	135	75	99	105	0.942857	78	1.538	3.103	36	24	48	5.01	82	426	2.21	5.18	1	3.1	87	33	2.98	150	7.18	52.3	270.36	14.68	3.26875
877	1	2015-8-24 11:00:21	1	47	0	0	1	0	20yrs, 20/day	Occasional	163	80	30.1103	156	98	91	101	0.90099	70			31	27	44.3	5.79	93	441	1.42	5.07	1.44	2.94	67	24	3.63	137	7.27	58.7	269.4	12.33	3.17292
878	1	2015-8-25 10:52:04	1	42	0	0	0	0	0	0	172	64	21.6333	116	77	85	91	0.934066	76	-1.586	-0.129	48	27	48.9	5.37	92	626	1.8	6.86	1.61	4.24	64	104	3.83	147	6.21	45.8	253.49	5.13	1.22436
879	1	2015-8-25 11:06:11	1	56	0	0	0	0	26yrs, 20/day	often	162	63	24.0055	154	97	89	88	1.01136	90	2.616	4.491	43	28	45.7	5.88	111	463	2.31	4.25	1.11	1.88	56	44	3.35	176	5.07	65.5	141.27	11.9	3.10987
880	1	2015-8-25 9:37:13	1	45	0	0	0	1	0	Occasional	171	77	26.3329	113	74	93	96	0.96875	72	0.605	2.17	53	36	47.1	4.78	87	416	0.94	4	0.97	2.42	53	15	1.64	157	7.19	45.2	276.14	15.7	3.33538
881	1	2015-8-25 10:52:34	1	26	0	0	1	0	5yrs, 5/day	often	167	72	25.8166	113	69	85	96	0.885417	68	-0.654	-0.086	32	23	51.6	4.72	76	586	2.87	6.17	1.47	3.57	105	82	2.87	157	7.19	45.2	350.36	15.73	3.2998
882	1	2015-8-25 10:16:29	2	61	0	0	0	0	0	0	151	60	26.3146	129	74	83	92	0.902174	76	-2.076	-0.36	17	19	27.8	5.18	65.4	236	1.5	6.21	1.78	3.76	78	46	5.05	135	6.6	49.6	91.39	10.4	2.39431
883	1	2015-8-25 10:58:49	2	50	0	0	1	0	0	0	165	64	23.5078	104	60	76	94	0.808511	68	-1.079	-0.052	35	31	45.7	5.91	54	278	2.09	4.09	1.1	2.19	88	23	2.92	127	5.36	53.7	68.79	7.87	2.06719
884	1	2015-8-25 9:08:19	1	56	0	0	1	0	0	Occasional	183	81	24.187	119	73	90	102	0.882353	68	-1.098	0.778	35	28	41.2	5.94	101.1	470	13.5	4.24	1.41	2.27	78	29	3.94	148	7.87	51.4	264.58	9.86	2.60304
885	1	2015-8-25 10:56:15	2	31	0	0	0	0	0	Occasional	155	66	27.4714	124	73	85	100	0.85	72	0.338	0.558	144	89	44.6	4.36	58	326	1.61	4.07	1.21	2.19	72	24	3.91	129	6.17	60.6	47.12	16.45	3.18764
886	1	2015-8-25 13:38:32	1	35	0	1	1	0	Occasional	Occasional	159	71	28.0843	138	87	93	96	0.96875	62	-0.266	0.881	38	18	53.4	6	81	386	2.37	4.87	0.97	2.92	54	60	2.94	166	6.84	68	53.86	10.6	2.82667
887	1	2015-8-25 8:52:57	1	45	0	0	1	0	0	Occasional	165	75	27.5482	118	73	92	101	0.910891	70			24	19	42.9	5.28	81	433	1.74	5.16	0.95	3.34	91	42	7.17	147	4.69	73.1	126.33	11.81	2.77141
888	1	2015-8-25 9:44:20	1	43	0	0	0	0	20yrs, 20/day	Occasional	169	72	25.2092	121	77	87	102	0.852941	72	-2.077	-0.582	35	23	46.4	4.86	77	381	1.63	4.96	1.07	3.08	71	51	1.22	171	4.39	61.4	99.49	5.81	1.25496
889	1	2015-8-25 9:03:15	1	40	1	0	1	0	0	Occasional	173	101	33.7465	144	103	106	110	0.963636	72	2.658	4.036	55	29	43.3	5.59	74	355	1.31	3.89	1.02	2.27	57	34	1.95	162	5	61.4	333.01	24.16	6.00242
890	1	2015-8-25 9:45:21	1	44	0	0	0	0	6yr, 20/day	Occasional	178	81	25.565	99	68	94	104	0.903846	70	-2.023	-0.493	41	27	43	4.78	89	626	1.94	4.93	1	2.88	76	15	2.52	162	5.04	54.6	251.08	14.35	3.04858
891	1	2015-8-25 8:38:43	1	47	0	0	0	0	11yr, 4/day	often	165	64	23.5078	108	69	83	94	0.882979	70	-2.245	-0.614	26	22	45.7	4.96	89	360	0.75	3.83	1.36	2.1	58	32	10.91	152	6.64	57.2	247.23	10.84	2.38962
892	1	2015-8-25 10:43:44	2	60	0	0	1	0	0	0	159	75	29.6665	117	68	97	103	0.941748	68	-0.832	0.817	49	32	49.3	5.49	60	474	2.66	4.77	1.17	2.46	75	22	8.38	141	5.29	61.1	207.71	17.7	4.3188
893	1	2015-8-25 10:05:00	1	46	0	0	1	0	0	0	160	67	26.1719	113	70	86	91	0.945055	62	0.686	2.284	42	31	42	4.71	80.9	528	2.46	4.29	1.04	2.2	68	54	4.04	181	4.57	62.6	326.75	8.51	1.78143
894	1	2015-8-25 9:59:01	1	52	1			1	10yrs, 20/day	0	170	74	25.6055	126	88	93	93	1	70	-1.608	0.168	30	26	45.9	6.25	73	306	1.74	4.89	1.36	2.79	75	18	1.86	149	5	45.2	363.86	9.87	2.74167
895	1	2015-8-25 9:07:13	1	44							178	77	24.3025	125	79	90	96	0.9375		-0.025	1.505	65	47	47.1	5.35	77	458	4.4	7.21	1.08	4.23	81	63	2.43	154	4.97	57.6	238.55	11.24	2.67262
896	1	2015-8-25 10:40:45	2	36	0	0	0	0	0	0	158	59	23.634	89	59	77	91	0.846154	82	0.301	0.676	14	17	48.3	4.49	52	287	1.05	4.78	1.55	2.62	50	10	2.15	141	6.46	60.6	27.95	10.48	2.09134
897	1	2015-8-25 9:24:02	1	33	0	0	0	0	0	0	167	64	22.9481	127	79	88	94	0.93617	72	-0.817	0.222	21	22	49.3	5.27	65	467	4.12	5.1	1	2.38	80	20	4.9	140	4.17	52.5	223.13	9.49	2.22277
898	1	2015-8-25 11:02:02	1	54	1	1	0	0	0	0	162	69	26.2917	110	71	85	93	0.913978	70	-0.387	1.44	36	26	47.3	5.27	97	425	1.12	5.04	1.28	3.06	61	19	3.63	154	7.07	42	315.66	10.82	2.53428
899	1	2015-8-25 11:03:10	1	32	0	0	0	0	0	Occasional	160	70	27.3438	111	83	86	96	0.895833	78			62	40	49.9	5.15	78	453	3.1	5.02	0.94	2.87	88	118	4.76	177	6.78	60	280.48	9.13	2.08976
900	1	2015-8-25 11:03:46	1	33	1	0	0	0	0	Occasional	170	73	25.2595	118	82	85	97	0.876289	68			31	30	41.4	4.45	79	402	1.3	4.36	1.24	2.51	64	27	2.39	163	7.97	54.7	174.46	10.15	2.00744
901	1	2015-8-25 8:49:12	1	32	0	1	1	0	0	Occasional	180	93	28.7037	118	86	97	101	0.960396	69			20	18	48.5	4.42	84	402	2.98	5.54	1.18	3.2	66	20	2.89	161	8.04	59.8	317.05	15.32	3.00953
902	1	2015-8-25 11:05:01	1	47	1	0	0	0	Occasional	10yrs, 100g/day	170	74	25.6055	143	85	87	98	0.887755	52	-0.875	0.756	17	23	50.3	4.54	68	352	0.65	3.4	1.11	1.92	73	26	2.67	166	5.71	57.7	207.17	6.13	1.2369
903	1	2015-8-25 8:16:20	1	42	1	0	0	0	0	Occasional	171	70	23.939	115	75	85	93	0.913978	84			23	24	51.5	6.08	77	534	3.94	6.43	1.62	3.24	64	44	2.49	161	6.42	49.7	240.13	13.32	3.59936
904	1	2015-8-25 10:00:43	1	25	0	0	0	0	4yrs, 3-5/day	Occasional	184	99	29.2415	124	74	101	106	0.95283	68			55	32	49.3	5.45	74.5	406	2.65	5.92	1.01	3.72	77	38	1.42	177	6.52	60.6	152.03	17.42	4.21951
905	1	2015-8-25 10:54:54	1	40	0	0	0	0	10yrs,10/day	0	160	74	28.9062	118	80	94	97	0.969072	78			30	30	53.1	5.8	74	600	4.1	3.88	0.8	1.71	70	50	2.69	150	4.27	61.8	410.05	16.26	4.19147
906	1	2015-8-25 10:44:42	2	43	1	0	1	0	0	0	156	60	24.6548	110	62	80	89	0.898876	62			70	41	46.4	4.47	63	377	1.24	4.56	1.29	2.56	80	30	2.71	133	6.798	65.4	69.93	10.82	2.14957
907	1	2015-8-25 9:15:23	1	38	0	0	1	0	0	Occasional	158	73	29.2421	106	70	90	93	0.967742	71			34	23	45.1	3.61	69.2	352	1.35	4.09	1.27	2.21	80	28	2	151	8.49	61.7	107.22	13.84	2.22055
908	1	2015-8-25 8:43:33	1	33	0	0	1	1	0	Occasional	170	76	26.2976	117	69	87	97	0.896907	72			34	25	48.4	4.91	74.1	368	1.44	3.71	1.27	1.84	84	26	2.41	159	6.07	54.8	204.22	15.34	3.34753
909	1	2015-8-25 9:31:24	1	42	0	0	1	0	26yrs, 5/day	Occasional	173	73	24.3911	129	83	84	96	0.875	60			42	38	45.1	5.3	76.5	456	1.94	4.89	1.07	3.05	62	40	3.62	160	7.06	60.9	279.53	12.21	2.87613
910	1	2015-8-25 8:40:43	1	44	1	0	1	0	0	Occasional	167	66	23.6652	126	85	86	90	0.955556	80	-0.814	0.717	27	23	47.2	5.58	100	513	1.82	3.85	1.46	1.85	44	46	2.78	165	6.77	69.8	255.95	16.02	3.97296
911	1	2015-8-25 11:02:14	2	35	0	0	0	0	0	0	166	66	23.9512	123	80	85	101	0.841584	70			76	49	46.6	5.65	51	450	2.26	6.68	1.15	4.33	105	57	4.53	128	5.44	61.9	8.26	13.73	3.44776
912	1	2015-8-25 11:03:21	1	49	0	0	1	0	0	Occasional	161	68	26.2336	104	70	83	96	0.864583	64	-0.657	1.035	32	30	45.3	5.26	85	416	1.29	5.82	1.49	3.56	60	79	4.92	129	6.02	51.1	379.5	10.5	2.45467
913	1	2015-8-25 8:43:51	2	81	1	0	0	0	0	0	148	61	27.8488	157	75	88	100	0.88	55			25	29	45.4	4.82	71	444	2.64	7.65	2.18	4.19	63	41	3.79	142	5.51	44.3	147.95	11.52	2.46784
914	1	2015-8-25 8:11:36	1	54	1	0	1	1	0	Occasional	175	80	26.1224	134	73	95	104	0.913462	50	-1.251	0.576	28	27	45.1	4.46	81	329	0.9	3.27	1.51	1.33	55	26	2.19	141	5.23	58.8	139.2	5.9	1.16951
915	1	2015-8-25 10:48:25	2	61							156	65	26.7094	165	80	86	93	0.924731		2.548	4.264	46	33	49	10.95	61	259	7.07	5.74	1.05	1.71	88	65	4.93	130	4.92	54.7	255.14	12.05	5.86433
916	1	2015-8-25 9:36:56	1	57	1	0	0	0	30yrs, 10/day	Occasional	170	91	31.4879	128	83	109	108	1.00926	68			30	26	42.8	4.56	89	378	1.79	4.05	1.12	2.17	82	36	2.58	146	6.67	55.9	245.76	7.92	1.60512
917	1	2015-8-25 11:01:38	2	44	0	0	1	0	0	0	155	61	25.3902	119	77	83	94	0.882979	82			39	26	44	5.69	61	314	1.8	3.86	1.12	2	65	21	5.25	129	3.75	48.3	142.89	7.33	1.85368
918	1	2015-8-25 11:05:52	1	35	0	0	1	0	12yrs, 20/day	Occasional	167	60	21.5139	115	82	74	84	0.880952	64			26	50	48.4	4.87	90	363	5.68	5.19	1.46	1.66	82	114	4.91	170	8.72	61.9	373.33	3.47	0.751062
919	1	2015-8-25 9:04:41	1	47	0	0	1	0	0	0	163	69	25.9701	145	92	90	93	0.967742	80			38	32	50.4	5.36	84	533	4.29	6.11	1.21	3.33	85	68	3.51	153	5.34	41.6	399.87	8.13	1.93675
920	1	2015-8-25 8:25:51	1	31	0	0	1	0	0	Occasional			#DIV/0!	161	98			#DIV/0!	82			80	42	46.7	5.57	79	406	2.1	5.17	0.94	3.02	86	36	2.41	166	7.1	61.5	369.31	11.46	2.83699
921	1	2015-8-25 10:53:38	1	52	0	0	0	0	10yrs, 20/day	0	163	64	24.0882	112	68	86	91	0.945055	74			27	17	49.7	6.8	92	456	1.57	3.78	1.19	1.96	59	24	1.7	154	7.31	67	346.8	13.12	3.96516
922	1	2015-8-25 11:05:30	1	34	0	0	1	0	10yrs, 30/day	Occasional			#DIV/0!					#DIV/0!	62			31	24	49.3	5.01	95	524	5.05	5.74	1.28	2.5	104	96	3.69	154	7.66	62.3	126.95	11.16	2.48496
923	1	2015-8-25 8:59:14	1	47							164	86	31.975	168	109	103	106	0.971698				21	24	46.8	5.07	89	442	2.08	4.64	0.95	2.77	84	31	3.87	148	5.99	46	238.26	6.39	1.43988
924	1	2015-8-25 8:27:28	1	49	1					Occasional	164	79	29.3724	153	98	93	101	0.920792	60			20	23	47.9	8.18	77	337	2.11	4.77	1.29	2.68	114	39	2.22	161	5.76	58.2	175.54	8.44	3.06841
925	1	2015-8-25 10:44:05	2	61	1	0	1	0	0	0	157	70	28.3987	122	67	91	101	0.90099	66	4.331	6.047	12	21	48.8	5.57	55	362	1.67	4.91	1.63	2.74	67	16	3.01	143	5.51	43.1	113.83	8.88	2.19829
926	1	2015-8-25 8:36:09	2	55	0	0	0	1	0	0	160	50	19.5312	114	66	74	89	0.831461	70	-1.076	0.249	24	23	49.3	4.84	57	435	2.05	6.31	1.6	3.61	66	36	1.83	136	6.69	49.6	299.9	10.76	2.3146
927	1	2015-8-25 8:41:12	1	51	0	0	0	0	0	Occasional	168	69	24.4473	108	64	83	95	0.873684	72	-2.199	-0.45	24	25	42.4	4.38	79	360	1.51	4.82	1.14	2.88	53	26	3.14	138	7.28	63.1	304.46	6.95	1.35293
928	1	2015-8-25 9:34:20	1	52	0	0	1	0	31yrs, 30-40/day	often	168	76	26.9274	134	86	90	98	0.918367	66	-0.279	1.497	20	24	47.8	5.55	74	401	1.5	5.98	1.74	3.5	57	110	1.8	161	5.43	56.5	211.73	6.9	1.702
929	1	2015-8-25 8:45:10	1	52	1	0	1	0	0	often	180	78	24.0741	133	96	91	102	0.892157	72	-0.212	1.564	19	19	46.5	4.55	94	427	1.05	4.51	1.27	2.7	68	16	5.51	152	6.29	45.6	211.19	9.2	1.86044
930	1	2015-8-25 10:46:25	2	45	0	0	0	0	0	0	166	64	23.2254	104	61	79	93	0.849462	68	0.018	0.778	48	32	43.6	4.91	69.8	381	8.36	5.94	0.77	1.55	83	20	3.5	147	5.91	52.2	185.46	8.65	1.88762
931	1	2015-8-25 8:27:56	1	52	1	0	0	0	20yrs, 20/day	Occasional	167	74	26.5338	131	72	93	98	0.94898	68	-1.382	0.394	57	35	46.2	5.39	95	446	2.25	5.18	0.91	3.14	115	66	5.63	159	8.26	57.8	182.51	8.14	1.94998
932	1	2015-8-25 11:03:02	1	60	1	0	0	0	40yrs, 10/day	Occasional	175	90	29.3878	121	68	98	104	0.942308	64	0.139	2.102	31	26	46.1	4.81	75	254	2.1	4.77	0.88	3.01	75	23	2.89	166	6.58	54.7	79.57	21.02	4.49361
933	1	2015-8-25 9:56:49	1	43	0	0	1	0	14yrs, 10/day	0	166	63	22.8625	141	84	82	90	0.911111	78	-1.672	-0.177	25	21	46.4	5.32	102	533	1.37	6.07	1.41	3.76	83	27	3.31	147	5.39	52.9	251.39	3.77	0.891396
934	1	2015-8-25 11:01:16	1	43	1	0	0	0	10yrs, 10/day	Occasional	161	64	24.6904	127	70	82	93	0.88172	66	3.563	5.057	90	75	50.2	5.32	71	468	1.89	5.62	1.23	3.47	60	64	3.96	166	6.58	54.7	309.28	4.47	1.05691
935	1	2015-8-25 8:30:59	1	50	1	0	0	0	31yrs, 20/day	often	168	61	21.6128	132	74	83	87	0.954023	80	1.294	3.016	9	19	46.3	13.57	73	268	2.07	6.08	1.37	3.78	90	47	4.97	168	7.02	50.4	283.82	7.05	4.25193
936	1	2015-8-25 9:57:51	1	28	0	0	1	0	10yrs, 10/day	0	165	73	26.8136	128	82	92	100	0.92	82			37	23	47.1	6.19	80.1	428	2.15	6.98	1.6	4.45	107	28	3.94	163	9.42	53.7	153.97	16.85	4.63562
937	1	2015-8-25 8:33:59	1	57	1	0	1	0	0	Occasional	179	72	22.4712	134	80	86	94	0.914894	68			16	18	43.8	5.32	81.1	418	1.11	3.9	1.2	2.22	51	16	3.6	157	4.99	59.7	240.94	10.54	2.49212
938	1	2015-8-25 8:54:12	1	43	1	0	1	0	Occasional	Occasional	173	74	24.7252	125	88	86	97	0.886598	70			33	17	46.9	5.37	89	459	2.06	6.1	1.47	3.73	43	40	6.58	161	5.83	58.1	216.28	6.4	1.52747
939	1	2015-8-25 9:59:12	1	28	1	0	1	0	0	Occasional	165	77	28.2828	114	82	86	101	0.851485	80			71	40	46.1	5.13	79	381	1.96	4.87	1.31	2.73	71	52	3.4	165	7.73	64.1	309.55	14.13	3.22164
940	1	2015-8-25 10:57:43	2	41	0	0	1	0	0	0	156	68	27.9421	130	87	85	99	0.858586	82	0.505	1.078	84	47	49.1	5.42	62	462	3.45	7.41	1.49	4.64	91	184	1.82	146	9.12	66.6	145.81	12.22	2.94366
941	1	2015-8-25 11:02:09	1	32	0	1	0	0	11yrs, 10/day	Occasional	169	75	26.2596	116	77	90	96	0.9375	66			50	32	47.9	5.04	81	396	1.69	4.78	0.9	2.99	134	43	8.97	157	5.5	60.1	330.72	19.71	4.41504
942	1	2015-8-25 11:02:31	1	50	0	0	1	0	26yrs, 10/day	Occasional	171	74	25.3069	89	58	86	97	0.886598	60			26	20	42.1	5.23	97	480	2.97	5.15	1.15	2.93	88	103	7.58	152	7.25	48.1	143.77	9.13	2.12222
943	1	2015-8-25 11:04:54	1	35	0	0	1	0	11yrs, 10/day	Occasional	165	75	27.5482	114	72	87	102	0.852941	76			33	25	48.7	5.22	86	525	2.61	4.54	0.79	2.68	71	50	3.39	150	7.06	51.3	279.8	11.23	2.60536
944	1	2015-8-25 8:10:44	1	55	0	0	1	0	0	often	168	72	25.5102	121	79	93	93	1	90			37	32	49.8	7.26	111	578	3.65	5.73	1.22	3.08	61	96	4.7	165	6.79	49.8	254.87	8.82	2.84592
945	1	2015-8-25 11:01:24	1	34	0	1	1	0	5yrs, 10-20/day	Occasional	170	74	25.6055	113	77	88	96	0.916667	80			33	28	49	5.19	89	394	1.98	4.45	1.01	2.46	45	18	2.54	177	5.59	48.2	197.25	11.33	2.61345
946	1	2015-8-25 11:02:54	1	44	0	0	1	0	0	0	171	78	26.6749	121	77	87	96	0.90625	70			13	14	48.1	4.76	97	506	1.08	4.55	1.24	2.66	70	14	7.67	150	6.59	54	386.2	18.14	3.83762
947	1	2015-8-25 8:39:23	1	35	1	0	1	0	0	Occasional	167	87	31.1951	146	99	94	106	0.886792	72			37	26	50.3	5.26	91	554	6.76	5.71	0.99	1.68	72	28	6	153	6.29	50.7	373.6	13.91	3.25185
948	1	2015-8-25 8:18:44	1	58	0	0	0	0	0	Occasional	168	71	25.1559	135	76	90	95	0.947368	66			20	23	46.5	4.85	80	331	1.56	4.93	0.88	3.22	90	23	2.48	166	4.66	60.5	299.36	10.16	2.19004
949	1	2015-8-25 11:02:38	1	39	0	0	0	0	6yrs, 4/day	Occasional	160	64	25	106	72	83	95	0.873684	80			30	22	48.8	5.45	92	361	3.12	6.78	1.44	3.98	70	70	4.71	160	4.48	55.1	82.14	7.31	1.77064
950	1	2015-8-25 8:34:30	1	33							176	82	26.4721	137	82	94	99	0.949495				30	19	51	4.92	71	523	1.92	5.9	1.48	3.45	99	55	8.9	171	6.01	52.9	347.07	12.84	2.80768
951	1	2015-8-25 8:42:04	1	29	0	0	0	0	0	0	163	73	27.4756	118	81	91	97	0.938144	64			46	29	50.4	6.12	67	398	2.7	6.32	1.19	3.95	100	77	3.85	157	6.84	62.1	253.27	14.07	3.82704
952	1	2015-8-25 8:29:08	1	79	1	0	0	0	40yrs, 10/day	Occasional	164	75	27.8852	151	69	96	100	0.96	66			19	24	44.6	7.2	86	470	9.78	5.53	0.7	1.04	43	37	3.47	159	5.68	52.3	197.25	49.88	15.9616
953	1	2015-8-25 10:47:18	2	32	0	0	1	0	0	0	167	65	23.3067	117	68	83	101	0.821782	74			25	24	44.9	4.65	66	301	1.19	4.78	1.92	2.43	58	16	2.52	144	8.98	64.7	61.45	10.06	2.07907
954	1	2015-8-25 11:04:39	1	32						Occasional	174	72	23.7812	118	66	81	95	0.852632	62			61	44	48.7	4.17	84.4	368	1.44	4.84	1.26	3	56	33	7.65	160	4.87	51.3	297.22	6.96	1.28992
955	1	2015-8-25 11:03:11	2	49	0	0	0	0	0	0	151	54	23.6832	134	75	80	89	0.898876	74			14	21	46	5.16	55	233	1.35	4.15	1.16	2.28	54	12	2.27	128	9.05	78.2	247.1	6.94	1.59157
956	1	2015-8-25 10:12:02	1	52	0	0	0	0	0	often	159	83	32.831	160	102	105	103	1.01942	72			89	70	47.3	5.73	82.7	424	2.95	5.34	1.41	2.92	86	103	5.2	148	4.62	70.7	325.9	11.92	3.03563
957	1	2015-8-25 9:50:21	2	48							150	56	24.8889	150	82	80	89	0.898876				44	31	48.3	4.97	60	478	1.33	6.02	2.15	3.23	83	52	9.9	150	6.79	65.8	25.41	8.79	1.94161
958	1	2015-8-25 11:08:14	2	49	1	0	1	0	0	0	153	48	20.5049	111	66	68	85	0.8	68			28	27	47.5	5.76	59	235	1.83	6.35	1.45	4	92	24	4.38	122	5.36	49.6	371.99	8.4	2.1504
959	1	2015-8-25 9:56:35	1	44	0	0	1	0	20yrs, 5-6/day	Occasional	170	82	28.3737	113	72	93	99	0.939394	64			35	34	50	5.48	67	342	3.19	5.53	1.22	3.01	82	32	2.6	182	5.56	63.3	296.15	8.09	1.97036
960	1	2015-8-25 11:11:18	1	42	1	0	1	0	20yrs, 10/day	Occasional	174	81	26.7539	111	85	90	100	0.9	66			38	29	43.4	4.16	86.7	615	2.71	5.52	1.15	3.09	93	54	3.7	169	6.98	50.8	253.27	13.47	2.49045
961	1	2015-8-25 10:46:10	2	30	0	0	1	0	0	0	167	71	25.4581	116	72	87	96	0.90625	70			11	13	48.5	4.55	52	389	4.83	6.65	1.43	3.39	38	16	3.95	135	7.35	58.3	46.37	12.62	2.55204
962	1	2015-8-25 9:46:46	1	42	0	0	1	0	Occasional	Occasional	164	71	26.398	120	64	88	92	0.956522	77			27	21	49.9	4.99	62	307	3.65	6.84	1.28	3.96	106	22	2.83	162	5.68	56.1	349.75	6.74	1.49478
963	1	2015-8-25 10:01:02	1	44	0	0	0	0	21yrs, 10/day	often	170	72	24.9135	111	79	88	95	0.926316	60			35	37	48.6	6.08	86	557	2.64	5.87	1.43	3.41	69	302	10.51	149	10.32	60.2	354.57	9.21	2.48875
964	1	2015-8-25 10:07:33	1	48	0	0	1	0	10yrs, 10/day	Occasional	167	77	27.6095	112	75	95	101	0.940594	62			32	20	48	4.88	73	337	4.98	5.77	1.27	2.24	71	42	5.84	151	5.72	59	320	12.92	2.8022
965	1	2015-8-25 9:38:17	2	32	0	0	0	0	0	0	156	62	25.4767	108	77	74	94	0.787234	76			13	15	46.6	5.5	67	292	1.08	3.85	1.45	1.97	68	11	2.56	131	5.72	58.8	49.84	10.77	2.63267
966	1	2015-8-25 8:46:24	1	26	0	0	1	0	Occasional	Occasional	180	89	27.4691	116	59	91	105	0.866667	68			78	42	49.9	5.43	78	457	1.97	4.34	1.1	2.47	58	52	4.68	163	5.71	69.5	410.05	13.27	3.20249
967	1	2015-8-25 9:40:10	1	42	0	0	1	0	27yrs, 21/day	Occasional	158	64	25.6369	112	69	82	91	0.901099	62			41	33	45.1	4.75	98.2	532	2.38	4.97	1.23	2.67	81	48	4.69	164	6.72	62.3	264.79	9.85	2.07944
968	1	2015-8-25 10:01:34	2	31	0	0	0	0	0	0	161	56	21.6041	113	74	67	84	0.797619	62			18	22	49.2	4.28	74	281	1.24	5.5	1.76	3.06	51	11	1.74	144	7.42	66.3	37.25	7.1	1.35058
969	1	2015-8-27 8:49:18	2	45	0	1	1	0	0	0	153	53	22.6409	104	68	73	88	0.829545	78			17	19	45.5	6.78	56.6	349	9.82	6.43	0.89	1.36	43	22	4.06	128	0.97	66.3	15.7	10.73	3.23331
970	1	2015-8-27 8:46:12	2	47	1	1	1	0	0	0	164	63	23.4236	128	66	83	95	0.873684	78	3.587	4.45	33	30	44	5.95	61	341	1.62	4.5	1.24	2.46	55	44	2.55	139	5.06	61.2	38.22	13.33	3.52504
971	1	2015-8-27 10:20:47	1	41	0	0	0	0	0	Occasional	170	70	24.2215	137	87	83	95	0.873684	72			40	31	48.1	4.86	98	459	8.58	6.91	1.11	2.04	68	110	2.88	164	5.76	48.7	347.34	9.49	2.04984
972	1	2015-8-27 9:58:18	1	51	0	0	1	1	21yrs, 10/day	often	171	75	25.6489	112	61	91	97	0.938144	78			26	25	46.4	6.94	74	426	1.95	6.16	2.21	3.17	91	63	5.12	165	7.1	56.6	143.18	3.89	1.19985
973	1	2015-8-27 10:20:54	1	42	1	0	1	0	0	0	174	84	27.7447	123	97	89	100	0.89	78			39	21	50.2	5.54	79	321	1.49	4.11	1.21	2.3	57	15	3.35	163	8.81	63.1	152.81	13.56	3.33877
974	1	2015-8-27 10:17:32	1	40	0	1	0	0	Occasional	Occasional	164	75	27.8852	133	97	92	99	0.929293	76			88	50	41.4	5.54	74	572	1.27	4.69	1.43	2.7	81	46	3.81	162	6.74	56.8	343.05	16.29	4.01096
975	1	2015-8-27 9:38:29	2	34	0	0	0	0	0	0	152	64	27.7008	114	72	83	97	0.85567	96			30	28	44.3	4.71	50.9	198	3.9	5.66	1.08	2.93	81	19	2.29	134	8.02	57.6	37.93	12.05	2.52247
976	1	2015-8-27 8:11:38	1	51	1	0	1	0	31yrs, 20/day	Occasional	180	111	34.2593	131	85	115	109	1.05505	70			46	44	49.4	6.63	103.3	419	1.7	5.99	1.39	3.66	48	34	3.8	159	6.44	59.5	265.33	10.48	3.08811
977	1	2015-8-27 10:12:17	1	35	1	0	1	0	Occasional	Occasional	172	77	26.0276	118	77	89	95	0.936842	62			50	34	45.7	4.88	78	359	3.97	5.1	0.99	2.61	99	25	4.25	155	5.07	59.8	350.82	6.4	1.38809
978	1	2015-8-27 9:40:59	2	52	0	0	0	0	0	0	152	60	25.9695	119	78	81	94	0.861702	72			28	26	43.8	5.16	71.7	305	1.38	3.71	1.09	1.92	83	14	2.8	148	8.66	63.2	113.15	7.09	1.62597
979	1	2015-8-27 10:48:13	1	46	0	0	1	0	10yrs, 10/day	Occasional	154	61	25.721	140	96	88	90	0.977778	80			33	34	49	6.91	85	543	4.62	5.54	1.14	2.64	80	45	6.81	163	7.49	59.9	391.29	13.23	4.06308
980	1	2015-8-27 10:21:40	1	43	0	0	0	0	0	often	174	85	28.075	123	76	99	103	0.961165	70	-1.157	0.337	25	19	47.2	5.09	106	388	2.44	5.95	1.7	3.41	76	34	3.47	154	5.53	61	373.87	4.5	1.018
981	1	2015-8-27 10:27:20	1	37	0	0	0	0	21yrs, 20/day	16yrs, 250g/day	168	83	29.4076	121	79	107	100	1.07	60	-1.151	0.094	46	42	46.6	5.15	72	515	3.07	5.01	1.22	2.82	72	160	4.44	172	7.01	62.7	299.1	8.98	2.05542
982	1	2015-8-27 9:28:33	1	33	0	0	1	0	6yrs, 20/day	Occasional	166	70	25.4028	117	84	90	93	0.967742	70	-0.803	0.236	45	27	46.9	3.72	92	480	2.26	4.27	1	2.4	70	60	4	167	8.1	53	291.86	9.07	1.49957
983	1	2015-8-27 9:00:01	2	54	1	0	1	0	0	0	158	62	24.8358	104	61	84	99	0.848485	75			16	21	45.1	5.5	55	295	1.08	5.54	1.94	3.04	95	13	8.04	133	5.01	62.7	57.04	7.69	1.87978
984	1	2015-8-27 10:30:43	1	61	0	0	0	0	31yrs, 10/day	Occasional			#DIV/0!	109	77			#DIV/0!	70	0.33	2.314	24	27	45	5.04	87	502	1.96	4.71	1.39	2.73	95	30	3.59	161	5.12	65.1	330.72	7.04	1.57696
985	1	2015-8-27 10:14:20	1	58	1	0	0	0	21yrs, 20/day	21yrs, 250g/day	163	72	27.0993	125	89	99	96	1.03125	84			36	33	44.9	5.07	90	383	1.16	5.35	1.9	2.93	89	67	6.57	178	4.71	59.7	246.83	10.29	2.31868
986	1	2015-8-27 10:43:49	1	40	1	0	1	0	20yrs, 7/day	Occasional	164	64	23.7954	157	98	80	92	0.869565	75			30	24	48	5.6	59	370	0.99	5.82	1.5	3.67	78	47	3.92	142	5.69	57.7	92.73	6.34	1.57796
987	1	2015-8-27 8:41:27	1	38	0	0	1	0	10yrs, 10/day	Occasional	165	71	26.079	112	77	85	96	0.885417	72			50	34	46.2	5.16	85.6	538	2.28	6.32	1.2	3.98	101	35	5.05	144	5.89	53.3	321.61	6.44	1.47691
988	1	2015-8-27 9:54:02	1	70	1	1	0	0	0	0	158	61	24.4352	121	71	88	94	0.93617	78	-0.303	1.839	54	40	46.9	8.79	82	326	1.3	2.85	0.87	1.5	96	29	3.53	156	9.39	56.5	76.27	12.88	5.03179
989	1	2015-8-27 10:36:51	1	26	1	0	0	1	11yrs, 10/day	Occasional	169	97	33.9624	115	75	102	108	0.944444	76			71	42	50.2	4.15	95	526	4.09	4.85	0.79	2.56	63	69	3.13	159	7.21	57.9	206.37	20.37	3.75713
990	1	2015-8-27 10:01:46	1	52	1	0	0	0	20yrs, 20/day	Occasional	163	75	28.2284	107	64	91	103	0.883495	66	-0.453	1.323	20	29	43.6	5.27	88	477	2.1	4.33	1.33	2.06	78	36	5.19	137	5.61	45.7	378.16	14.32	3.35406
991	1	2015-8-27 10:46:18	1	29	0	0	0	0	0	0			#DIV/0!	127	80			#DIV/0!	72	0.488	1.278	108	68	52.5	6.03	68	536	4.13	3.47	0.65	1.61	79	91	3.49	150	6.07	65.9	380.57	25.97	6.95996
992	1	2015-8-27 8:26:59	1	36	1	0	0	0	6yrs, 10/day	Occasional	171	76	25.9909	121	80	89	94	0.946809	74			52	23	50.6	5.53	97	435	5.5	3.97	0.78	1.36	70	215	4.41	151	5.34	55.7	38.83	15.52	3.81447
993	1	2015-8-27 8:44:51	1	60	1	0	1	0	0	often	170	59	20.4152	117	76	81	91	0.89011	72	-1.517	0.446	45	31	49.6	9.12	91.9	363	2.47	4.53	1.05	2.57	60	18	2.04	178	4.82	50.9	383.16	17.18	6.96363
994	1	2015-8-27 10:43:14	1	46	0	0	0	0	0	0	168	82	29.0533	129	84	98	101	0.970297	78			81	39	46.5	5.08	62.9	295	2.53	4.6	0.77	2.68	39	99	2.47	164	6.02	55.4	357.89	17.18	3.87886
995	1	2015-8-27 10:44:55	1	52	0	0	0	0	32yrs, 20/day	often	173	81	27.0641	132	88	91	100	0.91	75			40	28	46.6	7.04	86	352	5.08	5.28	0.99	2.3	62	97	2.92	151	5.51	62.7	20.92	12.63	3.95179
996	1	2015-8-27 10:45:15	1	43	0	0	0	0	0	0	170	78	26.9896	135	82	89	100	0.89	68			15	28	45.4	5.21	96.3	301	0.97	6.51	1.9	3.83	73	31	2.51	163	8.62	68.4	329.43	13.3	3.07969
997	1	2015-8-27 9:54:29	2	33	0	0	1	0	0	0			#DIV/0!	121	74			#DIV/0!	75			12	17	41.8	4.41	60.2	344	1.56	4.32	1.1	2.44	106	9	4.13	130	8.62	69.1	80.57	15.17	2.97332
998	1	2015-8-27 8:18:34	1	56	0	0	1	0	0	Occasional	176	83	26.7949	108	74	95	98	0.969388	76			28	31	42.8	4.77	71.4	565	0.72	3.86	0.97	2.3	72	28	2.48	154	8.75	63.7	301.86	9.35	1.9822
999	1	2015-8-27 9:57:00	1	49	1	0	0	0	10yrs	often	167	75	26.8923	157	98	94	97	0.969072	72	1.525	3.217	59	37	44.6	8.51	102	375	1.32	6.16	1.48	4.03	61	97	5.6	170	9.51	44.9	345.26	17.07	6.45625
1000	1	2015-8-27 10:46:47	1	60	1	0	0	0	41yrs, 40/day	30yrs, 150g/day	165	63	23.1405	140	91	91	90	1.01111	78			10	20	46.8	5.73	66.1	526	1.63	4.21	1.32	2.28	51	42	3.156	158	4.73	47.5	12.89	9.72	2.47536
1001	1	2015-8-27 10:46:54	1	44	0	0	1	0	20yrs, 20/day	0	175	87	28.4082	115	78	98	101	0.970297	72			30	18	44.1	5.33	96	414	2.48	5.1	1.21	2.93	68	31	5.79	185	9.58	54.4	169.07	21.04	4.98414
1002	1	2015-8-27 10:47:46	2	48	1	0	1	0	0	0	156	58	23.833	115	75	77	90	0.855556	78			10	14	45.6	6.64	64	175	1.03	3.64	1.3	1.92	58	11	3.03	136	5.9	61.3	307.37	13.61	4.01646
1003	1	2015-8-27 10:32:48	1	46	0	0	1	0	0	Occasional	166	65	23.5883	111	74	81	92	0.880435	76			48	32	43.2	5.45	99	356	6.56	6.04	1.01	1.99	90	75	6.76	149	6.53	65.3	391.9	10.67	2.58451
1004	1	2015-8-27 8:43:25	1	51	0	0	1	0	22yrs, 5/day	0	161	70	27.0051	114	66	89	94	0.946809	75			35	28	32	5.41	70	341	2.6	5.99	1.57	3.45	122	37	4.48	142	12.94	65.5	276.28	33.07	7.9515
1005	1	2015-8-27 10:17:10	1	37	0	0	0	0	Occasional	Occasional	164	75	27.8852	133	86	87	98	0.887755	68			23	20	46.6	4.81	86.7	424	2.72	4.6	1.15	2.37	99	45	3.44	146	6.42	63.2	11.15	17.33	3.70477
1006	1	2015-8-27 9:16:05	2	46	0	0	0	0	0	0	160	65	25.3906	138	74	80	96	0.833333	72			13	26	46.4	5.21	67	312	0.92	3.87	1.22	2.16	97	28	3.77				342.67	11.91	2.75783
1007	1	2015-8-27 9:34:38	2	41	0	0	1	0	0	0			#DIV/0!	122	77			#DIV/0!	68			25	22	47.8	5.93	48	328	0.95	5.79	1.62	3.51	58	11	3.51	135	5.13	61.5	396.44	19.21	5.0629
1008	1	2015-8-27 10:18:23	1	45	0	0	0	0	31yrs, 20/day	0	159	65	25.711	109	74	87	92	0.945652	72			32	23	45.7	5.18	87	486	2.72	6.06	1.32	3.66	87	43	2.55	154	7.2	49.4	160	18.79	4.32588
1009	1	2015-8-27 10:32:50	1	49	1	0	1	0	27yrs, 10/day	Occasional	164	80	29.7442	161	98	100	99	1.0101	72	-1.523	0.168	16	18	42.9	6.57	73	391	2.96	5.37	1.1	2.94	82	53	2.43	143	4.57	50.3	342.02	19.72	5.75824
1010	1	2015-8-27 8:27:18	2	63	1	0	1	1	0	0	155	52	21.6441	131	83	78	87	0.896552	72	-0.922	0.929	14	16	42.1	7.29	57	206	1.08	4.38	1.67	2.3	90	12	2.82	125	4.18	50.8	470.93	14.06	4.55544
1011	1	2015-8-27 10:20:08	1	53	1	0	1	0	31yrs, 30/day	21yrs, 200g/day	172	80	27.0416	145	87	89	98	0.908163	80			22	27	47.2	14.6	54	333	2.91	5.82	1.29	3.44	68	51	4.2	148	6.32	60	367.94	10.78	6.99502
1012	1	2015-8-27 10:21:45	1	52	1	0	1	0	31yrs, 20/day	often	177	89	28.4082	147	101	98	98	1	82			32	35	45	6.04	93.1	523	3.07	6.41	1.13	3.87	93	59	5.55	166	7.58	49.5	147.42	13.69	3.675
1013	1	2015-8-27 10:47:35	1	45	0	0	1	0	16yrs, 20/day	Occasional	170	83	28.7197	124	85	97	102	0.95098	72			42	29	50.5	4.97	86.6	453	4.24	5.38	0.95	2.88	63	70	5.92	166	12.71	61.5	321.62	21.44	4.73586
1014	1	2015-8-27 9:56:31	2	53	0	0	1	0	0	0	152	51	22.0741	111	64	72	86	0.837209	78	-0.967	0.236	14	20	48.2	4.87	68	365	2.35	6.66	1.34	4.4	85	22	2.68	137	5.12	52.1	331.98	10.67	2.30946
1015	1	2015-8-27 9:11:25	2	51	0	0	0	0	0	0	155	66	27.4714	112	70	97	101	0.960396	75			47	15	45.2	5.96	49	258	8.33	6.69	1	2.32	115	189	5.15	131	7.07	58.3	402.91	39.82	10.5479
1016	1	2015-8-27 10:16:52	1	42	0	0	0	1	0	Occasional	159	72	28.4799	132	78	84	93	0.903226	72			40	28	47.4	5.27	92	380	1.58	4.93	1.49	2.69	93	70	3.04	165	7.64	46.1	36.12	9.49	2.22277
1017	1	2015-8-27 10:19:01	1	52	0	1	1	0	0	Occasional	163	67	25.2174	143	75	84	92	0.913043	74			33	22	46.6	5.08	85	499	0.76	6.48	1.59	4.33	100	15	5.24	132	7.33	77.6	376.68	8.71	1.96652
1018	1	2015-8-27 10:47:43	1	42	1	0	0	0	20yrs, 10/day	0	155	72	29.9688	125	86	89	95	0.936842	72			56	30	46.4	9.84	82	416	9.72	6.45	0.54	1.84	93	40	3.05	176	4.92	59	403.56	22.12	9.67381
1019	1	2015-8-27 10:20:26	1	33	1	0	1	0	Occasional	Occasional	172	81	27.3797	121	73	90	100	0.9	84			30	28	51.1	5.68	108	463	1.51	3.61	1.07	1.94	63	27	4.9	154	6.73	41.9	270.45	25.88	6.53326
1020	1	2015-8-27 9:15:00	1	52	1	0	1	0	30yrs, 10/day	Occasional	160	60	23.4375	135	84	82	94	0.87234	72	1.384	3.16	28	22	45.9	4.14	110	532	4.01	5.22	1.07	2.53	70	76	4.9	154	8.29	64.4	253.28	14.19	2.61096
1021	1	2015-8-27 8:16:43	1	39	0	0	1	0	0	Occasional	159	67	26.5021	126	76	92	94	0.978723	76	1.521	2.856	49	17	50.1	5.51	75	392	1.27	5.22	1.29	3.19	78	45	6.96	136	6.08	49.5	295.71	11.17	2.73541
1022	1	2015-8-27 8:21:16	1	42	0	0	0	0	21yrs, 20/day	Occasional			#DIV/0!	106	70			#DIV/0!	74			41	35	47	5.13	76	432	4.37	5.19	0.98	2.64	116	28	3.71	149	8.26	61.8	239.03	21.15	4.8222
1023	1	2015-8-27 10:44:43	1	28	1	0	1	0	10yrs, 20/day	Occasional	169	100	35.0128	116	85	114	107	1.06542	82			134	54	48.7	4.69	79	495	2.55	4.74	0.72	2.89	72	108	2	168	7.53	54.6	418.46	17.56	3.66028
1024	1	2015-8-27 9:54:21	1	39	0	1	1	0	0	often	167	75	26.8923	138	92	90	96	0.9375	84			50	26	47.6	5.84	80	414	1.43	4.32	1.22	2.59	77	77	6.23	151	5.71	66.6	344.29	12.5	3.24444
1025	1	2015-8-27 8:41:09	1	54	0	0	0	0	0	0	172	90	30.4218	141	82	108	105	1.02857	72	1.796	2.624	29	24	44.8	7.44	88	473	1.07	5.12	1.46	3.18	76	33	2.47	174	7.96	72.8	492.96	11.61	3.83904
1026	1	2015-8-27 9:24:49	2	42	0	1	1	0	0	0	159	60	23.7332	104	67	71	97	0.731959	60			48	36	43.5	5.37	54.8	272	1.05	4.37	1.94	2.06	73	46	8.81	145	7.15	73	68.87	10.37	2.47497
1027	1	2015-8-28 8:34:12	2	57	1	0	1	1	0	0	160	65	25.3906	116	78	82	95	0.863158	90	-0.947	0.505	21	20	50.1	6.8	70	356	2.18	3.74	1.18	1.85	85	21	2.81	139	4.86	54.6	159.62	20.94	6.32853
1028	1	2015-8-28 9:17:55	1	55	0	1	0	1	0	Occasional	165	78	28.6501	131	90	95	103	0.92233	72	-0.286	1.566	31	22	48.2	4.58	105	486.6	1.95	4.96	1.25	3	79	20	2.97	152	6.95	55.1	208.91	14.64	2.98005
1029	1	2015-8-28 9:33:59	1	22	0	0	0	0	0	0	176	72	23.2438	121	64	86	100	0.86				152	75	44	4.42	68.1	570	2.03	4.93	1.41	2.76	53	26	4.84	153	6.57	55.9	208.91	17.81	3.49868
1030	1	2015-8-28 10:11:36	1	46	1	0	0	0	20yrs, 10/day	often	173	88	29.4029	126	91	100	105	0.952381	60			26	19	45.9	4.65	95	414	2.13	4.56	1.08	2.6	87	37	3.47	131	4.29	63.3	29.56	17.28	3.5712
1031	1	2015-8-28 8:49:03	1	68	1					Occasional	169	85	29.7609	128	74	104	102	1.01961	66	1.214	3.324	21	28	45.6	6.03	93	569	1.67	4.56	0.9	2.84	69	16	3.88	121	7.34	55.3	73.46	16.21	4.34428
1032	1	2015-8-28 8:23:55	1	36	1	0	0	0	occasioanl	Occasional	173	86	28.7347	124	80	88	99	0.888889	60	-2.776	-1.58	41	21	51.1	4.92	92	364	1.49	4.86	1.37	2.8	60	29	4.59	169	8.13	60.3	297.33	17.9	3.91413
1033	1	2015-8-28 9:12:06	2	46	0	0	0	0	0	0			#DIV/0!	109	68			#DIV/0!	76			20	23	43.8	5.07	65.5	391	2.13	4.6	1.27	2.52	96	49	4.13	137	8.26	70.2	148.75	11.22	2.52824
1034	1	2015-8-28 10:13:09	1	36	0	0	1	0	10yrs, 6/day	Occasional	163	82	30.863	176	106	92	100	0.92	70			24	21	50.4	5.13	87	410	1.31	5.23	1.6	3.05	83	33	2.04	163	8.96	63	157.54	17.11	3.90108
1035	1	2015-8-28 8:36:34	1	52	0	0	1	0	0	Occasional	169	89	31.1614	143	83	96	105	0.914286	72			34	29	47.1	5.24	72	332	1.33	4.22	1.18	2.46	61	34	2.64	160	6.21	63.2	270.77	15.7	3.65636
1036	1	2015-8-28 9:33:12	1	29	0	0	0	0	0	0	172	73	24.6755	132	83	82	94	0.87234	76	0.057	0.847	174	77	54.1	5.32	81	483	2.87	6.42	1.13	4.06	93	89	3.4	146	6.65	52.7	475.79	17.34	4.09995
1037	1	2015-8-28 10:05:14	1	45	1	0	0	0	0	0	161	77	29.7056	109	71	94	103	0.912621	72			39	28	44.3	4.81	81	564	2.25	4.87	0.9	2.97	69	24	3.24	151	7.83	64	360.49	17.59	3.76035
1038	1	2015-8-28 8:27:12	1	43	0	0	1	0	21yrs, 20/day	Occasional	165	73	26.8136	116	63	93	97	0.958763	72	0.33	1.824	29	28	47.8	4.92	85	429	1.93	5.73	1.37	3.54	82	28	1.91	165	7.14	46.8	128.7	17.15	3.75013
1039	1	2015-8-28 8:44:07	1	39	1	0	1	0	21yrs, 20/day	0			#DIV/0!	111	68			#DIV/0!	70			22	18	44.8	4.64	70	402	1.98	4.59	1.2	2.56	74	30	3.51	152	7.15	64.9	87.47	13.14	2.70976
1040	1	2015-8-28 8:30:38	1	49	0	0	0	0	0	often	163	67	25.2174	125	88	92	97	0.948454	80			34	30	49.3	6.68	72	414	2.75	5.08	1.29	2.68	82	39	4.14	157	6.07	50.3	390.28	9.94	2.95108
1041	1	2015-8-28 10:24:06	2	35							159	66	26.1066	105	68	91	100	0.91				31	17	44.7	4.96	68	193	0.96	4.43	1.19	2.71	61	43	2.1	123	7.35	57.2	107.52	13.5	2.976
1042	1	2015-8-28 10:05:21	1	46	1	0	1	0	0	0	166	66	23.9512	110	81	82	90	0.911111	78	-2.023	-0.424	62	45	48	10.51	68	334	1.81	4.62	1.16	2.71	58	158	7.26	154	5.19	38.5	361.78	21.58	10.0803
1043	1	2015-8-28 10:21:02	2	57	0	0	1	1	0	0	157	57	23.1247	113	61	79	90	0.877778	70	2.292	3.744	38	32	49.3	6.48	72	363	3.62	5.07	1.16	2.64	77	15	5.48	145	7.18	57.7	245.18	16.53	4.76064
1044	1	2015-8-28 10:18:55	2	41	1	0	1	0	0	0	164	65	24.1672	113	87	86	101	0.851485	72			16	18	44.6	5.58	62	355	1.56	5.26	1.27	3.14	86	37	3.07	133	5.31	60.1	36.24	12.3	3.0504
1045	1	2015-8-28 9:31:05	1	68	0	0	0	0	40yrs, 30/day	often			#DIV/0!	120	72			#DIV/0!	82			49	67	43.2	5.24	73	376	1.7	4.76	1.78	2.18	84	357	12.25	169	4.48	45.5	475.14	9.1	2.11929
1046	1	2015-8-28 9:34:58	1	46	0	0	1	0	26yrs, 20/day	Occasional	167	81	29.0437	133	86	99	96	1.03125	78			39	29	48.5	5.61	77	406	3.43	5.6	1.08	3.24	95	36	2.15	164	4.42	55.1	329.72	23.59	5.88177
1047	1	2015-8-28 9:23:45	1	50	0	0	0	0	30yrs, 20/day	Occasional	167	70	25.0995	109	73	80	93	0.860215	74			21	23	46.4	5.44	73	418	1.47	6.7	1.24	4.39	79	45	3.11	173	8.87	59.1	293.77	10.51	2.54108
1048	1	2015-8-28 8:39:22	1	41	1	0	1	0	0	Occasional	172	94	31.7739	125	85	101	108	0.935185	78			31	24	47.6	5.96	94	529	1.45	3.84	1.14	2.05	68	10	4.52	161	5.97	54.2	331.01	28.26	7.48576
1049	1	2015-8-28 10:06:15	1	52	1	0	1	0	0	0	174	97	32.0386	146	75	103	108	0.953704	80	-1.942	-0.166	20	18	47.2	6.8	69	424	1.72	3.01	0.9	1.43	58	17	2.95	139	7.11	74	184.29	17.06	5.15591
1050	1	2015-8-28 10:12:13	1	50	1	0	1	0	31yrs, 20/day	Occasional	174	67	22.1297	131	86	85	90	0.944444	76			51	30	47.3	5.04	84	518	3.35	5.25	0.87	2.98	75	57	3.94	155	7.87	53.4	352.71	13.2	2.9568
1051	1	2015-8-28 9:53:57	1	33	0	0	0	0	Occasional	often	163	62	23.3355	113	72	81	95	0.852632	60			25	29	48.6	3.99	93	454	1.09	4.84	1.66	2.79	76	27	1.83	167	7.33	64.7	304.78	10.03	1.77865
1052	1	2015-8-28 9:26:59	1	41	0	0	0	1	0	Occasional	162	64	24.3865	123	79	80	90	0.888889	70			45	37	52.5	4.78	90	513	4.24	5.4	1.34	2.64	96	174	4.08	163	6.53	64.8	419.76	10.68	2.26891
1053	1	2015-8-28 9:25:20	1	59	0	0	1	0	20yrs, 20/day	Often	182	93	28.0763	137	84	102	102	1	58	-0.178	1.764	68	43	43	4.79	82	356	2.9	4.94	0.87	2.8	70	38	5.03	151	6.15	55.7	147.23	21.66	4.61117
1054	1	2015-8-28 10:57:29	1	28	0	0	1	0	0	0	177	84	26.8122	139	85	97	101	0.960396	72			51	28	50.5	4.94	74	415	1.67	4.34	0.94	2.63	87	42	4				313.52	13.9	3.05182
1055	1	2015-8-28 10:12:56	1	62	1	0	1	1	45yrs, 10/day	0	170	78	26.9896	155	93	86	96	0.895833	78			42	51	45.7	10.1	100	524	3.12	5.43	1.47	2.73	133	73	3.84	150	14.1	49.4	336.52	13.27	5.95676
1056	1	2015-8-28 9:04:52	1	61	0	0	1	0	0	Occasional	165	64	23.5078	121	72	85	90	0.944444	72	-1.146	0.838	27	22	45.7	7.27	81	403	2.07	7.51	1.53	4.93	77	64	5.17	155	5.55	70.2	130.59	13.99	4.52032
1057	1	2015-8-28 9:18:36	1	32							163	76	28.6048	116	75	90	98	0.918367				42	24	48	4.28	73	536	1.88	5.51	1.35	3.16	77	44	2.63	158	10.84	63.2	212.47	16.1	3.06258
1058	1	2015-8-28 8:50:40	1	51	1	0	1	0	20yrs, 20/day	Occasional	169	80	28.0102	115	71	100	98	1.02041	60	1.769	3.518	13	14	46.8	12.32	80	253.4	2.88	3.51	0.85	1.61	78	27	3.36	141	8.58	56.1	140.9	13.91	7.6165
1059	1	2015-8-28 9:35:09	2	50	0	0	1	0	0	0	164	80	29.7442	150	90	90	107	0.841121	78	-0.411	0.616	54	33	42.1	6.08	67	306	2.33	6.36	1.58	3.9	54	35	4.39	132	5.22	62.1	24.67	21.74	5.87463
1060	1	2015-8-28 10:04:21	1	30	1	0	0	0	0	Occasional	172	69	23.3234	97	67	78	90	0.866667	78			98	43	51.4	5.19	85	368	2.6	4.64	0.97	2.54	71	114	2.35	158	5.17	50.8	128.13	14.82	3.41848
1061	1	2015-8-28 9:43:57	2	28									#DIV/0!					#DIV/0!				74	37	47.5	5.18	58	312	1.6	4.9	1.26	2.9	63	32	2.5	142	6.29	53.9	62.88	27.5	6.33111
1062	1	2015-8-28 9:48:01	2	32	0	0	1	0	0	0	163	65	24.4646	124	82	84	95	0.884211	90			19	22	46.2	4.13	62.5	288	0.92	5	1.63	2.83	70	21	2.85	139	5.77	56.1	111.87	6.05	1.11051
1063	1	2015-8-28 10:08:39	1	40	0	0	1	0	0	often	158	69	27.6398	123	83	82	94	0.87234	72			29	22	50.9	5.05	87	378	0.62	3.38	1.68	1.43	66	28	4.36	162	6.31	56.2	225.75	11.29	2.53398
1064	1	2015-8-28 8:05:47	1	50	0	0	0	0	0	Occasional	166	74	26.8544	117	81	88	98	0.897959	68			26	29	47.5	4.78	80	368	2.41	5.29	1.33	3	69	77	2.69	171	8.24	56.3	297.65	16.44	3.49259
1065	1	2015-8-28 10:02:20	1	53	1	1	0	0	30yrs, 10/day	Occasional	163	76	28.6048	141	78	90	96	0.9375	72			141	112	46.5	8.1	97	497	2.59	4.8	1.35	2.55	101	277	6.78	155	5.79	62.2	470.93	16.12	5.8032
1066	1	2015-8-28 9:25:38	1	63	0	1	0	0	21yrs	Occasional	169	78	27.31	109	66	96	100	0.96	58	-1.115	0.907	20	22	42.7	5.21	85	365	1.83	4.21	1.13	2.4	113	20	4.09	157	6.62	56.8	242.27	16.99	3.93413
1067	1	2015-8-28 10:25:06	2	33	0	0	1	0	0	0	153	60	25.6312	103	81	77	94	0.819149	72			112	67	49.3	5.19	66	325	2.32	4.25	1.15	2.18	87	54	1.9	138	6.76	53.7	52.03	17.62	4.06435
1068	1	2015-8-28 9:49:28	1	36	1	0	1	0	0	Occasional	178	77	24.3025	116	80	80	97	0.824742	72	1.051	2.247	39	26	52	4.38	95	391	1.44	3.69	0.98	2.12	64	30	2.81	169	8.01	68.8	290.85	16.95	3.2996
1069	1	2015-8-28 10:05:10	2	22	0	0	0	0	0	0	153	63	26.9127	130	80	76	96	0.791667	74			15	20	47.9	5.03	59.7	333	1.24	4.79	1.17	2.99	73	15	2.14	138	7	45.6	20.79	17.57	3.92787
1070	1	2015-8-28 11:01:13	1	71	1	0	0	0	0	Occasional	161	68	26.2336	143	89	95	99	0.959596	66	-2.714	-0.556	57	35	42.5	6.93	97	352	1.49	3.24	1.04	1.58	80	42	6.26	151	6.77	54.8	69.42	24.41	7.51828
1071	1	2015-8-28 10:03:18	1	56	1	0	0	0	0	0	170	76	26.2976	135	86	89	99	0.89899	84	-2.075	-0.199	39	30	45.4	5.9	82	519	1.41	5.09	1.27	3.17	59	32	5.09	165	53.95	52.2	214.74	14.35	3.76289
1072	1	2015-8-28 9:27:29	2	47	1	0	1	0	0	0	165	63	23.1405	121	91	82	94	0.87234	84			32	26	47.3	5.07	58	340	3.11	5.28	1.08	3.06	82	25	3.65	142	6.8	69.4	103.17	12.99	2.92708
1073	1	2015-8-28 10:11:02	1	32	1	0	0	0	0	Occasional	176	94	30.3461	121	81	102	103	0.990291	70			17	29	50.5	4.97	70	622	0.77	2.82	1.32	1.16	64	24	1.55	163	7.07	55.2	350.45	18.47	4.07982
1074	1	2015-8-28 9:18:59	1	40	0	0	1	0	0	Occasional	171	81	27.7008	126	72	89	100	0.89	74	0.193	1.57	29	31	47.5	5.03	69.7	355	0.93	3.9	1.12	2.29	59	16	5.83	166	7.09	57.5	173.93	12.88	2.8794
1075	1	2015-8-28 9:06:51	1	51	1	0	1	0	0	Occasional	163	63	23.7118	119	88	80	90	0.888889	66	0.823	2.572	58	31	47.7	4.98	91	494	4	4.93	0.87	2.42	88	42	6.78	174	5.68	63.2	341.05	15.54	3.43952
1076	1	2015-8-28 9:08:39	2	70	1	0	1	0	0	0			#DIV/0!					#DIV/0!	76	-0.371	1.965	30	24	46	6.41	83	342	2.29	4.8	1.2	2.57	90	14	2.46	161	6.31	64.9	248.42	24.98	7.11652
1077	1	2015-8-28 9:25:39	1	37	0	0	0	0	0	Occasional	176	79	25.5036	128	88	87	98	0.887755	78			50	37	49	4.83	81	373	1.82	5.51	1.3	3.3	102	58	3.04	169	4.28	61.7	165.51	12.47	2.67689
1078	1	2015-8-28 8:15:20	2	49	0	0	1	0	0	0	161	60	23.1473	170	104	84	98	0.857143	78	1.048	2.019	20	20	43.4	8.33	62.6	309	2.49	6.06	1.66	3.4	73	22	3.65	134	5.78	61.9	17.28	19.88	7.36002
1079	1	2015-8-28 10:27:41	1	50	0	1	0	0	0	often	179	81	25.2801	143	94	87	99	0.878788	76	-1.352	0.369	37	32	49	5.15	78	347	3.19	6.33	1.55	3.48	78	67	4.15	150	5.72	66.5	222.83	11.42	2.61391
1080	1	2015-8-28 8:20:56	1	35	0	0	1	0	0	Occasional	163	62	23.3355	112	75	80	90	0.888889	82			96	49	52	5.18	87	415	3.95	6.44	1.15	3.7	72	45	7.31	160	6.64	45	277.57	22.97	5.2882
1081	1	2015-8-28 10:02:08	1	30	1	0	1	0	0	Occasional	175	96	31.3469	145	90	94	110	0.854545	78	-1.827	-0.97	45	35	48.8	6.01	89	404	0.77	3.62	1.52	1.77	54	24	2.46	153	5.1	63.5	230.89	18.65	4.98162
1082	1	2015-8-28 8:41:20	1	51	0	0	1	0	0	Occasional	168	73	25.8645	151	84	87	93	0.935484	66			47	48	49.8	4.73	77	479	2.23	4.63	1.38	2.39	54	88	2.52	152	7.27	55.6	414.96	10.27	2.15898
1083	1	2015-8-28 10:02:31	1	30	0	0	0	0	0	Occasional	178	101	31.8773	146	92	101	110	0.918182	60			48	37	45.6	5.39	70	367					66	70		150	6.73	59.9	320.98	24.73	5.92421
1084	1	2015-8-28 9:21:03	1	33									#DIV/0!					#DIV/0!				68	39	42.1	4.5	80.1	428	1.33	3.92	1.04	2.27	125	33	3.36	173	8.2	61.6	427.97	11.04	2.208
1085	1	2015-8-28 10:21:14	2	52	1	0	1	0	0	0	170	70	24.2215	96	63	84	102	0.823529	74	-1.171	-0.028	49	41	47.6	5.74	88	248	1.44	4.4	1.51	2.19	199	148	3.18	139	6.12	64.7	45.47	13.78	3.51543
1086	1	2015-8-28 9:44:18	1	41	1	0	1	0	0	Occasional	168	79	27.9904	128	78	88	98	0.897959	64			24	22	44.9	4.97	84.7	368	2.65	3.41	0.77	1.69	92	20	4.64	161	8.31	60.1	339.51	14.62	3.2294
1087	1	2015-8-28 10:31:49	2	39	0	0	1	0	0	0	152	60	25.9695	103	63	81	96	0.84375	70			18	22	46.4	5.4	62	288	1.68	3.84	1.53	1.76	63	18	3.96	133	7.08	60.6	61.45	13.88	3.3312
1088	1	2015-8-28 9:14:51	1	33	0	0	1	0	Occasioanl	Occasional	165	68	24.977	115	84	82	94	0.87234	76	1.261	1.3	35	37	47.5	4.31	92	554	0.92	5.09	1.48	3.13	116	21	5.17	148	5.19	43.4	284.23	10.42	1.99601
1089	1	2015-8-28 11:22:50	2	29	1	0	1	0	0	0	153	65	27.7671	111	66	78	104	0.75	78			23	20	45.8	4.77	63.6	296	1.5	3.13	1.34	1.24	70	63	1.72	117	6.22	58.8	77.24	9.5	2.014
1090	1	2015-8-28 9:59:39	1	27	0	0	1	0	0	Occasional	165	65	23.8751	118	72	81	96	0.84375	66	-0.54	0.105	62	32	48.1	5.32	85	466	3.82	6.31	1.39	3.5	88	154	2.96	162	7.71	67.8	305.04	19.39	4.58466
1091	1	2015-8-28 10:02:52	1	46	0	0	1	0	28yrs, 20/day	0	165	66	24.2424	136	88	84	94	0.893617	72	-1.13	0.469	28	23	45.3	3.96	88	356	3.36	5.59	0.83	3.26	86	41	3.92	178	10.65	66.6	209.11	10.51	1.84976
1092	1	2015-8-28 8:39:52	1	51	0	0	1	0	30yrs, 20/day	Occasional	170	85	29.4118	135	93	96	104	0.923077	62	-0.053	1.696	22	23	44.1	4.78	82	371	1.54	4.55	1.29	2.62	56	20	3.83	165	5.99	56.2	121.28	12.24	2.60032
1093	1	2015-8-28 9:03:37	1	32	1	0	0	0	0	Occasional	172	77	26.0276	103	66	81	98	0.826531	70			22	22	49.2	5.31	71	370	1.58	4.66	1.32	2.7	68	12	6.35	157	5.4	55.9	361.95	9.92	2.34112
1094	1	2015-8-28 10:38:45	2	31	0	0	0	0	0	0	166	59	21.4109	94	53	74	95	0.778947	66	0.986	1.205	22	18	47.6	5.15	50	227	0.91	5.32	1.31	3.4	66	44	5.38	125	6.4	71.4	246.18	17.15	3.92544
1095	1	2015-8-28 10:00:01	1	37	0	0	1	0	10yrs, 15/day	often	182	80	24.1517	114	70	96	104	0.923077	50			25	21	48.3	5.48	89	432	1.43	5.3	1.57	3.15	85	31	6.06	151	5.82	48	363.25	13.49	3.28556
1096	1	2015-8-28 9:03:19	1	32	0	0	1	0	11yrs, 5/day	Occasional	169	74	25.9095	124	83	85	93	0.913978	72	0.909	1.89	33	23	49.4	4.44	90	421	2.27	5.55	1.37	3.18	83	29	3.47	156	10.96	49.3	446.5	17.91	3.53424
1097	1	2015-8-28 8:32:15	1	41	1	0	0	0	0	often	161	74	28.5483	137	89	92	94	0.978723	78			94	53	50.6	5.96	90	633	1.52	5.57	1.82	3.1	77	213	5.62	163	5.12	61.2	407.8	16.55	4.38391
1098	1	2015-8-28 10:05:29	1	35	1	0	1	0	10yrs, 20/day	Occasional	174	83	27.4145	120	75	91	97	0.938144	80			59	34	48	5.27	73	588	5.53	6.01	0.91	2.84	80	39	4.46	158	8.15	56.3	417.56	25.9	6.06636
1099	1	2015-8-28 8:24:53	1	62	0	0	1	0	8yrs, 10/day	Occasional	178	85	26.8274	133	81	95	101	0.940594	72	-1.168	0.835	45	37	45.2	8.1	71	366	1.38	4.27	1.17	2.49	107	43	2.62	153	6.03	53.5	324.55	5.72	2.0592
1100	1	2015-8-28 8:28:03	2	34	1	0	1	0	0	0	159	63	24.9199	112	71	83	96	0.864583	66	0.113	0.421	40	25	47.6	4.97	57	401	3.29	5.5	1.24	3.01	112	149	3.94	152	6.14	51.6	39.79	13.67	3.01955
1101	1	2015-8-28 8:39:36	2	28	0	0	1	0	0	0	154	71	29.9376	110	69	92	101	0.910891	84			107	81	47.5	6.39	62	289	1.6	5.34	1.3	3.26	71	74	2.26	125	7.27	50	302.76	27.73	7.87532
1102	1	2015-8-28 10:27:18	2	36	0	0	1	0	0	0	162	55	20.9572	137	101	71	93	0.763441	102			11	15	49.5	5.45	61	257	0.98	3.87	1.58	1.88	70	13	1.85	144	6.93	49.1	16.35	12.33	2.9866
1103	1	2015-8-28 9:51:19	1	41	0	0	1	0	10yrs, 20/day	Occasional	174	75	24.7721	100	71	89	100	0.89	58	-0.312	1.106	42	31	47.1	4.8	99	586	2.38	4.73	1.14	2.76	57	18	3.28	160	9.06	59.7	369.11	8.39	1.78987

## Sheet: Non-NAFLD
No	Fatty Liver	Date of specimen	Sex	Age	Present history	Past history	Family history	History of infectious diseases	History of smoking	History of alcohol consumption	Height（cm)	Body weight(Kg)	BMI	Systolic blood pressure	Diastolic blood pressure	Waist circumference(CM）	Hip circumference(CM）	Waist-to-hip ratio	Heart rate	Bone mineral density T value	Bone mineral density Z value	ALT	AST	Albumin	FPG	Creatinine	UA	TG	TC	HDL	LDL	ALP	GGT	AFP	Hb	White blood cell count	Neutrophil granulocyte percentage	Ferritin	Insulin			HOMA-IR
1	2	08-12 11:09	1	60	1	0	1	1	0	0	161	70	27.0051	116	77mmHG	89	95	0.936842	66			119	64	48.3	5.33	92.1	243	1.14	5.44	1.69	3.13	69	48	1.84	159	7.17	35.1	295.4	23.22	1	1	5.50056
2	2	08-12 08:10	2	50	0	0	0	0	0	0	158	53	21.2306	126	78	77	90	0.855556	78			21	21	46.6	5.51	67.9	269	1.24	5.09	1.54	3.02	52	20	2.39	131	5.12	62.8	28.33	25.07	2	2	6.13936
3	2	08-12 11:11	1	33	0	0	1	0	Occasional	Occasional	163	61	22.9591	128	71	77	96	0.802083	72			42	27	50.1	5.3	70	342	1.36	3.63	1.21	1.81	94	32	2.29	157	4.57	60.6	123.63	31.42	3	3	7.40116
4	2	08-12 11:10	1	46	0	0	0	0	无	Occasional	165	60	22.0386	108	74	78	94	0.829787	72			17	25	45.8	4.95	67	199	0.5	4.13	1.67	2.2	67	10	2	149	5.33	51.8	119.87	15.11	4	4	3.3242
5	2	08-12 08:33	1	30	0	0	0	0	Occasional	Occasional	168	71	25.1559	125	78	82	98	0.836735	78			28	24	51.3	5.31	100	326	1.43	4.3	1.25	2.37	90	20	3.36	168	5.12	52.8	76.41	16.87	5	5	3.98132
6	2	08-12 11:14	1	53	0	0	0	0	34yrs, 10/day	0	163	53	19.9481	116	70	73	88	0.829545	66	-0.771	1.031	25	26	45.5	5.31	81	190	0.65	5.29	1.92	3.01	64	10	1.92	142	6.05	58.3	245.35	10.94	6	6	2.58184
7	2	08-12 09:24	1	42	0	0	0	1	20yrs, 10/day	Occasional	180	81	25	125	70	89	99	0.89899	72			22	17	50.7	5.84	107.2	411	1.21	3.99	1.14	2.41	79	14	3.27	164	5.35	49.1	153.4	19.57	7	7	5.0795
8	2	08-12 10:21	2	25	0	0	1	0	0	0	156	58	23.833	149	87	79	95	0.831579	90	3.884	3.968	25	21	51.5	5.34	84.8	291	1.84	5.4	1.84	2.87	65	15	3.03	151	8.43	67.2	25.06	18.8	8	8	4.46187
9	2	08-12 08:58	2	29	0	0	1	0	0	0	160	51	19.9219	98	62	64	87	0.735632	78			15	15	53.1	5.44	53	175	0.93	4.77	1.75	2.61	78	18	11.2	152	6.91	52.5	88.06	20.05	9	9	4.84764
10	2	08-12 10:06	1	25	0	0	0	0	0	Occasional	173	63	21.0498	121	79	75	98	0.765306	70			17	35	49.2	5.65	112.2	336	0.75	3.06	1.07	1.68	84	10	2.93	164	5.03	47.1	114.46	24.5	10	10	6.15222
11	2	08-12 08:22	1	52	0	0	1	1	0	0	165	63	23.1405	109	78	81	90	0.9	76			22	26	45.2	4.6	84.1	390	2.07	5.39	1.29	3.14	69	104	3.2	162	5.76	66.8	96.57	9.52	11	11	1.94631
12	2	08-12 09:13	1	45	0	1	1	0	Occasional	often	167	58	20.7967	115	81	74	89	0.831461	66	-0.293	1.273	23	21	48.8	4.94	94	306	1.04	5.33	2.08	2.74	84	18	6.13	171	5.26	60.6	162.35	11.49	12	12	2.52269
13	2	08-12 08:36	2	43	0	0	1	0	0	0	155	49	20.3954	107	71	66	84	0.785714	71	-0.355	0.309	8	18	46.7	5.26	58	208	1.48	5.97	1.66	3.71	43	7	1.52	139	4.98	64.9	87.97	27.49	13	13	6.42655
14	2	08-12 09:43	1	33	0	0	1	0	10yrs, 5-6/day	Occasional	170	56	19.3772	116	64	68	89	0.764045	66	0。495	1.534	35	32	51.4	5.29	79.5	346	1.26	4.9	2.07	2.42	64	19	3.11	141	4.1	49.6	131.38	17.78	14	14	4.18028
15	2	08-12 11:13	1	44	0	0	1	0	23yrs, 20/day	Occasional	171	70	23.939	123	74	87	95	0.915789	72	4.128	5.658	36	27	51.4	5.47	84	426	2.29	5.4	1.18	2.99	104	104	5.5	166	6.1	56.5	156.94	12.72	15	15	3.09237
16	2	08-12 09:04	2	34	0	0	0	0	0	0	159	51	20.1733	99	61	61	89	0.685393	90	2.213	2.521	10	18	45.3	5.33	50	208	0.92	4.27	2.02	1.94	60	22	2.75	134	7.03	56.5	39.76	15.19	16	16	3.59834
17	2	08-12 10:13	1	31	0	0	0	0	20yrs, 20/day	Occasional	180	76	23.4568	118	76	86	101	0.851485	76			28	26	47.6	4.95	97	347	0.77	3.62	1.13	2.06	84	12	2.44	161	6.47	66.4	63.42	11.97	17	17	2.6334
18	2	08-12 08:31	1	39									#DIV/0!	122	63			#DIV/0!		-0.527	0.808	44	36	45.2	5.34	80	415	3.45	4.77	1.05	2.23	66	59	2.93	170	8.86	46.8	265.67	14.23	18	18	3.37725
19	2	08-12 10:29	2	42	0	0	1	0	0	0	143	45	22.006	107	56	69	87	0.793103	84			15	26	46.1	4.14	70	232	0.85	5.19	1.81	2.82	53	12	6.01	126	7.83	68.7	13.37	10.74	19	19	1.97616
20	2	08-12 10:22	2	48	0	0	1	0	0	0	156	43	17.6693	113	59	61	84	0.72619	70			12	18	50.7	5.72	68	260	0.63	5.72	1.81	3.49	62	13	1.87	131	3.45	60.2	27.9	12.12	20	20	3.08117
21	2	08-12 09:50	1	35	0	0	1	0	0	Occasional	166	68	24.677	105	71	81	97	0.835052	64	-0.553	0.593	26	27	49.9	5.76	81	341	1.15	6.76	1.97	4.19	74	15	5.32	143	7.63	43.8	303.74	15.52	21	21	3.97312
22	2	08-12 10:00	1	36	0	0	1	0	0	Occasional	172	60	20.2812	100	63	76	93	0.817204	70			19	16	50.3	8.92	86.2	273	1.44	3.45	1.2	1.65	91	12	3.07	151	6.83	74.5	314.65	14.17	22	22	5.61762
23	2	08-12 08:45	1	48	0	0	0	0	20yrs, 20/day	Occasional	163	68	25.5937	103	60	88	100	0.88	72	-1.907	-0.245	26	24	42.4	4.88	79	286	1.56	5.01	1.87	2.61	82	42	3.03	151	5.72	50.9	120.97	14.31	23	23	3.10368
24	2	08-12 09:16	1	44	0	0	1	0	0	Occasional	167	57	20.4382	109	77	75	88	0.852273	70			29	24	48.7	5.37	66.1	352	1.37	4.15	1.41	2.27	76	18	5.39	161	5.53	57.1	264.6	13.87	24	24	3.31031
25	2	08-12 09:26	1	28	0	0	1	0	0	Occasional	179	70	21.847	126	85	80	99	0.808081	92			21	25	49.3	4.81	90	394	1.61	4.32	1.25	2.34	72	24	2.6	180	6.53	65.4	149.59	18.72	25	25	4.00192
26	2	08-12 10:26	2	51	0	0	1	0	0	0	156	54	22.1893	109	62	79	91	0.868132	60	-0.421	0.664	15	18	47.1	5.1	60	239	0.76	5.38	2.15	2.86	83	14	3.1	142	5.91	59.3	111.14	13.54	26	26	3.06907
27	2	08-12 09:25	2	31	0	0	0	0	0	0	149	52	23.4224	91	58	75	91	0.824176	84	2.028	2.247	22	22	47.9	5.54	68	329	2.14	4.01	1.25	1.99	69	14	2.8	127	4.51	58.4	106.45	13.53	27	27	3.33139
28	2	08-12 09:12	1	46	0	0	1	1	0	Occasional	169	72	25.2092	120	76	86	98	0.877551	72			23	22	46.2	4.46	81	399	2.16	5.99	1.35	3.52	77	24	4.04	157	4.8	48.2	127.71	18.75	28	28	3.71667
29	2	08-12 08:29	1	42	0	1	1	0	21yrs, 20/day	Occasional	176	75	24.2123	105	65	86	98	0.877551	72			22	20	48.1	5.03	65	322	1.08	4.29	1.33	2.27	113	31	2.8	154	6.86	59.5	50.54	22.27	29	29	4.97858
30	2	08-12 08:50	1	50	0	0	1	0	0	Occasional	165	62	22.7732	133	79	81	92	0.880435	60			25	22	49.7	7.29	96.1	288	2.38	4.75	1.28	2.63	74	22	3.7	167	7.44	65.2	227.38	8.66	30	30	2.80584
31	2	08-12 09:56	2	50	0	0	0	0	0	0	162	54	20.5761	89	62	70	92	0.76087	72	-1.999	-0.972	9	16	47	4.78	54	243	1.08	4.46	2.52	1.6	52	12	3.24	136	5.46	66.4	18.73	6.69	31	31	1.42125
32	2	08-12 08:53	1	60	0	0	0	0	40yrs, 10/day	Occasional	170	70	24.2215	124	72	88	98	0.897959	86	-1.503	0.46	19	23	47.8	5.1	93	519	1.88	4.7	1.36	2.62	120	21	3.17	140	6.19	63.1	296.26	14.13		32	3.2028
33	2	08-12 10:28	2	41	0	1	1	0	0	Occasional	157	52	21.0962	107	62	73	91	0.802198	72	3.506	4.079	12	20	48.9	4.7	71	374	1.48	5.1	1.66	2.72	56	20	3.84	141	5.46	54.4	70.09	14.7	32	33	3.07067
34	2	08-12 11:10	1	41	0	0	1	0	10yrs, 10/day	often	166	68	24.677	112	83	84	94	0.893617	78	-0.498	0.92	21	19	48.8	5.98	100	368	0.83	5.38	1.89	3.07	80	20	1.85	156	7.4	39.4	130.41	15.12	33	34	4.01856
35	2	08-12 09:07	1	28	0	0	0	0	6yrs, 10/day	Occasional	165	55	20.202	122	74	68	90	0.755556	66			19	21	48.3	5.08	76	293	0.49	3.58	1.91	1.49	62	29	2.55	168	6.16	49.9	149.06	14.43	34	35	3.25797
36	2	08-12 11:10	1	46	0	0	1	1	22yrs, 10/day	Occasional	176	71	22.921	140	88	79	96	0.822917	75	-1.212	0.387	28	23	50	5.62	95	548	2.16	6.47	1.77	3.85	127	22	4.69	161	5.89	60.1	116.01	14.67	35	36	3.66424
37	2	08-12 10:25	1	30	0	0	0	1	7yrs, 10/day	Occasional	166	66	23.9512	111	64	76	93	0.817204	72			10	28	47.3	5.06	80	420	3.15	5.28	1.15	2.99	109	22	2.74	157	7.04	47.8	59.81	15.68	36	37	3.52626
38	2	08-12 10:04	1	43	0	0	0	0	0	Occasional	166	63	22.8625	123	66	73	91	0.802198	60	-0.439	1.055	22	21	49.6	4.56	101	353	0.62	3.7	1.53	1.89	65	22	3.12	152	4.34	53.5	125.49	13.7	37	38	2.77653
39	2	08-12 09:52	1	42	0								#DIV/0!					#DIV/0!				40	34	54.2	5.33	80	327	0.86	4.47	1.79	2.41	62	12	3.13	172	4.77	60.1	159.34	12.46	38	39	2.95164
40	2	08-12 10:04	2	25	0	0	1	0	0	Occasional	165	49	17.9982	118	80	66	91	0.725275	68			13	17	51.3	6.06	72.8	353	0.8	4.3	1.97	2.03	45	22	1.92	152	6.6	62.9	38.83	18.88	39	40	5.08501
41	2	08-12 09:17	1	43	0	0	0	0	0	0	173	66	22.0522	109	76	81	91	0.89011	90			25	21	45.2	5.94	78	431	1.1	4.34	1.4	2.27	70	11	3.02	145	5.01	51.1	112.07	14.77	40	41	3.89928
42	2	08-12 08:14	1	50	0	0	0	0	20yrs, 10/day	Occasional	155	63	26.2227	101	61	85	94	0.904255	60	0.653	2.374	32	26	46.7	7.48	78	269	2.08	5.04	1.01	3.02	102	31	3.21	174	8.41	64.3	157.52			42	0
43	2	08-12 10:17	2	47	0	0	1	0	0	0	154	44	18.5529	126	87	67	85	0.788235	84	-1.521	-0.658	28	37	51.3	4.66	54	374.5	2.18	5.72	1.94	3.26	107	47	5.33	133	5.67	54.3	92.89			43	0
44	2	08-12 08:42	1	41	0	0	1	0	17yrs, 10/day	Occasional	172	64	21.6333	118	74	82	94	0.87234	56			25	23	45.8	5.42	79.5	451	3.4	4.36	1.22	1.94	96	49	6.51	153	4.22	59.2	221.39	12	41	44	2.89067
45	2	08-12 10:25	1	26	0	0	0	0	8yrs, 10/day	Occasional	161	57	21.9899	122	80	70	91	0.769231	68			28	22	48.3	5.11	95	364	0.86	4.01	1.38	2.23	87	44	2.72	178	5.65	56.6	126.87	17.03	42	45	3.8677
46	2	08-12 11:03	1	51	0	0	1	0	27yrs, 10/day	Occasional	166	70	25.4028	121	77	88	96	0.916667	66	0.8	2.549	24	22	51.7	4.67	89	360	1.39	4.58	1.26	2.7	71	26	3.14	170	8.56	64.3	124.56	11.07	43	46	2.29764
47	2	08-12 09:20	1	28	0	1	1	0	0	Occasional	173	59	19.7133	110	69	76	91	0.835165	66			39	29	52.5	5.34	81	392	0.59	3.95	1.51	2.14	90	19	2.33	174	8.05	64.2	263.32	19.94	44	47	4.73243
48	2	08-12 09:17	1	44	0	0	0	1	0	Occasional	174	54	17.8359	130	85	65	88	0.738636	78	-0.126	1.404	59	50	51.7	5.44	93	265	0.83	4.43	2.07	2.01	88	48	1.89	186	4.6	52.2	99.62	13.09	45	48	3.16487
49	2	08-12 10:22	2	28	0	0	0	0	0	0	156	47	19.313	98	60	64	89	0.719101	66			15	19	48.6	5.15	83.1	358	0.69	3.86	1.8	1.84	58	13	3.09	129	5.31	55.9	19.65	11.51	46	49	2.63451
50	2	08-12 08:40	2	53	0	0	1	0	0	0	164	60	22.3081	93	58	76	92	0.826087	68	-1.08	0.123	12	23	49.7	5.8	52	247	0.84	6.7	1.96	4.12	82	18	3.01	132	6.36	48.1	76.79	15.56	47	50	4.01102
51	2	08-12 11:00	1	29	0	0	0	0	Occasional	Occasional	154	58	24.4561	115	77	79	90	0.877778	66	0.403	1.193	19	15	47.9	4.81	108	370	3.13	5.87	1.18	3.37	93	28	1.86	166	7.72	61.9	151.76	16.15	48	51	3.45251
52	2	08-12 08:06	2	44	0	0	0	0	0	0	147	41	18.9736	117	81	62	83	0.746988	68			11	20	49.8	4.79	75.8	234	0.77	4.26	1.75	2.13	56	8	3.45	148	6.26	60.7	63.27	11.16	49	52	2.37584
53	2	08-12 08:47	1	30	0	0	0	1	0	0	165	53	19.4674	105	65	64	87	0.735632	78			16	23	48.4	4.91	101.6	435	0.43	3.02	1.48	1.4	49	8	2.79	149	4.71	51.2	132	10.58	50	53	2.30879
54	2	08-12 10:25	1	31	0						169	66	23.1084	130	88	75	89	0.842697		2.351	3.271	23	26	48.7	4.85	109	451	0.69	3.53	1.39	1.82	87	13	3.59	139	8.59	62.7	288.56	11.62	51	54	2.50476
55	2	2015-8-13 8:05:38	2	40	0	0	1	0	0	0	148	49	22.3703	118	68	68	86	0.790698	78			19	25	44.8	4.69	63	251	1.22	4.88	1.6	2.76	52	12	1.29	142	7.93	58.6	48.98	14.08	52	55	2.9349
56	2	2015-8-13 8:08:42	2	53	0	0	1	0	0	0	165	66	24.2424	104	61	83	96	0.864583	66	0.503	1.705	49	31	44.4	5.68	89	359	0.85	6.62	1.71	4.36	117	68	2.92	137	4.23	48.2	95.59	15.09	53	56	3.80939
57	2	2015-8-13 8:20:55	2	51	0	0	1	0	0	0	159	52	20.5688	106	61	73	91	0.802198	60	0.94	2.024	19	28	48.6	5.01	59	305	1.1	4.13	1.68	1.97	68	12	3.27	148	5.61	56.1	83.77	12.3	54	57	2.7388
58	2	2015-8-13 8:24:23	1	49	0	0	0	0	25yrs, 10/day	often	171	74	25.3069	117	74	92	98	0.938776	78			52	42	42.9	4.68	88	437	3.01	3.63	1.01	1.45	83	53	8.01	161	7.1	63.5	171.55		55	58	0
59	2	2015-8-13 8:28:30	1	29	0	1	0	0	0	0	176	74	23.8895	131	69	86	101	0.851485	84	0.921	1.711	44	26	49.8	4.86	92	526	3.36	4.4	1.03	1.99	98	19	5.4	146	8.71	50.6	156.01	18.82	56	59	4.06512
60	2	2015-8-13 8:32:19	2	25	0	0	0	1	0	0	159	45	17.7999	90	62	60	86	0.697674	66			19	25	48.2	4.43	44	227	0.87	4.6	1.58	2.55	51	9	3.39	131	5.08	39	13.89	14.67	57	60	2.88836
61	2	2015-8-13 8:32:34	1	36	0	0	0	0	0	Occasional	172	68	22.9854	119	79	80	96	0.833333	76			25	25	47.3	5.48	101.7	443	1.18	4.32	1.3	2.43	50	39	3.43	152	8.04	59	134.17	15.47	58	61	3.7678
62	2	2015-8-13 8:37:44	1	31	0	0	0	0	0	Occasional	180	60	18.5185	95	60	75	90	0.833333	72			12	20	51.3	4.21	103.6	451	0.94	3.54	1.34	1.84	50	18	3.54	169	4.1	59.8	47.11	15.42	59	62	2.88525
63	2	2015-8-13 8:46:46	1	31	0	0	1	0	0	Occasional	171	61	20.8611	114	72	74	93	0.795699	84	0.138	1.058	11	19	49.2	5.41	98	324	0.92	4.28	1.8	2.11	62	13	3.11	162	4.43	54.9	160.43	25.96	60	63	6.24194
64	2	2015-8-13 8:55:33	1	41	0	0	0	0	0	Occasional	165	72	26.4463	114	75	90	94	0.957447	70			39	27	49.4	5.16	78	403	1.81	4.72	1.14	2.79	66	23	6.83	146	5.02	71.9	153.93	15.76		64	3.61429
65	2	2015-8-13 9:00:59	1	45	0	1	0	0	17yrs, 10/day	Occasional	172	64	21.6333	115	71	80	95	0.842105	72	-1.45	0.115	22	22	45.7	5.39	82.7	350	2.62	4.45	1.13	2.36	63	15	4.78	182	6.6	52.9	152.74	20.85	61	65	4.99473
66	2	2015-8-13 9:01:26	1	25	0	0	0	0	0	0	173	83	27.7323	124	76	91	104	0.875	78			30	25	49.5	5.15	84	430	1.05	4.1	1.14	2.42	75	24	4.43	148	5.64	62.1	134.88	17.64	62	66	4.0376
67	2	2015-8-13 9:03:15	2	38	0	0	1	0	0	0	152	52	22.5069	95	55	71	92	0.771739	72			11	17	48.7	5.06	60	200	1.1	5.02	1.46	2.95	46	6	5.28	107	6.22	56.3	28.39	14.97	63	67	3.36659
68	2	2015-8-13 9:05:42	1	32	0	0	0	0	11yrs, 10/day	Occasional	161	48	18.5178	113	69	68	87	0.781609	60			32	20	50.5	4.87	75.4	297	0.83	4.79	1.88	2.56	67	20	4.38	151	5.33	58.1	244.06	9.85	64	68	2.13198
69	2	2015-8-13 9:08:05	1	48	0	1	1	0	0	often	168	63	22.3214	119	82	80	93	0.860215	78			19	26	50.3	5.46	88.1	378	0.8	6.19	4.33	1.85	53	25	3.57	153	5.17	62	237.86	13.97	65	69	3.39005
70	2	2015-8-13 9:17:18	1	27	0	0	0	0	0	0	166	55	19.9594	114	68	70	90	0.777778	84			23	29	49.4	5.24	104.6	413	1.18	4.56	1.19	2.79	65	11	1.75	148	5.67	39.5	152.12	15.14	66	70	3.52594
71	2	2015-8-13 9:24:57	1	25	0	0	0	0	0	Occasional	167	58	20.7967	109	65	73	90	0.811111	66	-0.853	-0.368	19	25	52.7	5.49	95	457	0.71	3.5	1.34	1.89	67	22	3.39	170	5.52	69.9	287.27			71	0
72	2	2015-8-13 9:28:00	1	37	0	0	1	0	11yrs, 10/day	0	172	71	23.9995	131	72	83	95	0.873684	72			25	22	45.2	5.49	88.9	394	2.97	5.42	0.85	3.1	98	25	4	160	8.25	74.2	125.76	12.77	67	72	3.11588
73	2	2015-8-13 9:46:19	2	41	0	0	1	0	0	0			#DIV/0!	101	61			#DIV/0!	72			22	24	45.5	4.87	68	281	1.34	5.73	2.35	2.89	95	15	3.08	138	4.79	60.5	68.69	12.72	68	73	2.75317
74	2	2015-8-13 9:51:01	1	27	0	0	0	1	Occasional	Occasional	162	59	22.4813	107	70	75	91	0.824176	72			24	27	48.7	4.56	72	536	0.82	3.01	1.22	1.41	64	15	3.63	168	5.93	45.6	182.25	14.91	69	74	3.02176
75	2	2015-8-13 10:02:17	1	29	0	0	1	0	0	0	163	55	20.7008	127	79	73	86	0.848837	60			17	28	49.3	4.93	81	373	1.25	3.81	1.48	1.81	79	15	3.49	162	5.97	73.7	153.36	18.03	70	75	3.95057
76	2	2015-8-13 10:03:12	2	36	0	0	1	0	0	0	151	46	20.1746	118	75	63	86	0.732558	64	0.914	1.29	14	17	45.6	4.89	52	247	0.85	3.24	1.46	1.49	29	16	1.38	110	4.35	46.2	25.22	15.96	71	76	3.46864
77	2	2015-8-13 10:12:41	1	25	0	0	0	0	0	0	169	49	17.1563	109	71	62	83	0.746988	84			19	22	51.1	4.47	71	439	1.91	4.6	1.6	2.37	54	19	2.13	164	4.89	43	176.9	13.28	72	77	2.63829
78	2	2015-8-13 10:13:14	1	34	0	0	0	0	0	Occasional	171	61	20.8611	118	81	79	89	0.88764	60			46	33	47.7	4.63	91	489	0.66	5.31	1.92	2.81	52	135	7.83	172	4.96	55.8	186.31			78	0
79	2	2015-8-13 10:27:08	1	29	0	0	1	0	0	Occasional	165	56	20.5693	108	74	75	86	0.872093	76			31	28	51.4	4.69	97	344	0.82	5.44	1.48	3.18	77	15	2.13	158	6.66	50.5	177.54	11.75	73	79	2.44922
80	2	2015-8-13 10:44:14	2	38	0	0	1	0	0	0	155	49	20.3954	103	61	71	88	0.806818	70	-0.88	-0.43	17	17	47.2	4.39	62	366	1.17	5.63	1.09	3.89	45	9	1.78	128	6.39	49.3	54.46	8.85	74	80	1.72673
81	2	2015-8-13 10:46:05	1	46	0	0	1	0	Occasional	Occasional	174	74	24.4418	103	72	87	95	0.915789	72			22	22	48.9	5.2	88	454	3.32	4.73	1	2.51	91	205	2.65	169	7.51	67.5	121.9	11.13	75	81	2.57227
82	2	2015-8-13 10:47:19	1	38	1	0	0	0	Occasional	Occasional	166	60	21.7738	116	74	78	87	0.896552	74			24	24	44.7	5.58	84.2	401	1.52	5.34	1.11	3.46	71	39	5.28	156	7.49	67.3	286.2	17.16	76	82	4.25568
83	2	2015-8-13 10:48:22	2	33	0	0	0	0	0	0	153	49	20.9321	106	60	72	92	0.782609	56	0.873	1.15	18	21	45.6	4.96	67	206	0.76	3.69	2.07	1.59	37	9	2.06	135	4.03	59.1	18.79	12.27	77	83	2.70485
84	2	2015-8-13 11:11:03	2	39	0	0	1	1	0	0	157	49	19.8791	99	56	67	87	0.770115	72			11	17	47.3	4.99	49	160	0.76	4.78	1.58	2.72	38	10	2.41	128	4.36	62.6	14.13	10.17	78	84	2.25548
85	2	2015-8-13 11:12:39	2	50	0	0	1	0	0	0	163	48	18.0662	122	71	67	84	0.797619	66			13	16	42.1	6.66	66.5	297	1.36	4.51	1.36	2.52	64	15	4.65	135	6.03	69.1	97.32	11.95	79	85	3.5372
86	2	2015-8-13 11:14:01	1	27	1		0	0	12yrs, 10/day	0	160	65	25.3906	116	76	82	94	0.87234	84			15	21	48.3	4.59	70	406	1.17	4.74	1.14	2.84	69	20	2.93	148	6.48	55.7	121.95	18.36	80	86	3.74544
87	2	2015-8-13 11:14:27	1	28	0	0	0	0	1yrs,5/day	Occasional	172	71	23.9995	109	59	80	97	0.824742	64	0.172	0.892	74	36	47.8	5.09	93	365	1.59	5.13	1.17	3.23	86	51	2.39	153	6.51	49.7	238.07	18.97	81	87	4.29144
88	2	2015-8-13 11:14:33	1	26	0	0	0	0	0	Occasional	168	59	20.9042	120	78	69	90	0.766667	70			21	22	49.7	5.16	89	358	1.38	4.43	1.57	2.21	108	18	3.87	155	5.34	54.9	118.1	14.14	82	88	3.24277
89	2	2015-8-13 11:15:17	1	41	0	0	0	0	Occasional	Occasional	167	56	20.0796	124	72	73	86	0.848837	86			23	31	50	4.82	79	343	0.78	4.63	2.34	2.12	72	8	2.25	150	5.14	60.3	112.07	12.55	83	89	2.68849
90	2	2015-8-13 11:15:22	1	35	0	0	0	0	Occasional	Occasional	168	71	25.1559	112	67	84	99	0.848485	72			43	33	43.1	4.58	93.2	430	1.17	4.43	1.54	2.21	78	20	5.9	143	6.53	57.6	149.99	14.9	84	90	3.03298
91	2	2015-8-13 11:15:27	1	41	1	0	1	0	0	Occasional	169	67	23.4586	120	90	80	95	0.842105	72			28	31	53.1	4.51	79	483	3.9	5.52	1.06	2.83	75	27	3.68	165	6.24	64.7	89.99	13.81	85	91	2.76814
92	2	2015-8-13 11:15:36	1	42	0	0	1	1	Occasional	Occasional			#DIV/0!					#DIV/0!	72			43	42	48.3	4.93	73	356	2.61	6.4	1.54	3.89	64	26	4.26	150	4.36	42.4	146.27	18.82	86	92	4.12367
93	2	2015-8-14 8:46:27	1	45	1	0	1	0	21yrs, 15/day	Occasional	167	69	24.7409	111	70	87	95	0.915789	76			24	26	43.2	4.29	90	420	1.75	4.42	0.98	2.72	82	30	3.85	168	6.71	57.1	113.93	13.45	87	93	2.56447
94	2	2015-8-14 10:01:30	2	46	0	0	0	0	0	0	156	49	20.1348	113	56	65	85	0.764706	72			10	15	49.7	4.96	57	307	2.64	6.25	1.46	3.67	63	28	2.8	148	5.83	51.1	189.09	15.02	88	94	3.31108
95	2	2015-8-14 9:15:00	2	38	0	0	0	0	0	0	163	55	20.7008	94	70	69	93	0.741935	78			23	29	45.7	4.72	63	312	3.09	4.72	0.99	2.46	67	16	2.21	149	7.71	58.2	61.38	19.81	89	95	4.1557
96	2	2015-8-14 9:03:26	1	36	1	1	1	0	18yrs, 10/day	偶尔	170	83	28.7197	122	81	92	100	0.92	84			26	25	45.6	5.27	80	519	1.98	4.27	1.34	2.22	83	37	5.48	163	9.07	65.1	195.24	20.38	90	96	4.77345
97	2	2015-8-14 8:28:31	1	36	1	1	1	0	4yrs,10/day	0	174	63	20.8086	132	97	79	92	0.858696	78			18	22	49.9	5.02	80	340	0.96	4.71	1.31	2.85	94	9	6.73	161	6.95	58.9	269.09	17.57	1	97	3.92006
98	2	2015-8-14 9:23:59	2	50	0	0	1	0	0	0	154	45	18.9745	122	64	64	86	0.744186	72	-0.387	0.64	10	19	47.9	4.96	47	190	0.52	5.1	2.4	2.44	71	12	5.4	138	4.74	44.3	32.32	13	2	98	2.86578
99	2	2015-8-14 10:58:03	2	44	0	0	1	0	0	0	156	61	25.0657	102	69	75	101	0.742574	78			14	20	46.7	4.71	84.4	275	1.68	5.69	1.49	3.28	106	18	6.51	131	7.08	52.5	74.14	14.26	3	99	2.98509
100	2	2015-8-14 8:56:47	1	36	0	0	1	0	11yrs, 10/day	Occasional	165	70	25.7117	106	65	85	94	0.904255	86			33	25	46.8	5.24	86	266	4.01	4.1	1.03	1.66	70	35	4.04	164	8.88	48.5	89.19	15.14	4	100	3.52594
101	2	2015-8-14 10:38:00	1	42	0	0	1	0	20yrs, 10/day	often	170	75	25.9516	114	77	88	98	0.897959	76	-1.372	0.085	29	17	44.6	5.35	126	444	1.6	5.19	1.31	3.11	79	20	2.91	155	6.44	58.5	134.7	16.88	5	101	4.01369
102	2	2015-8-14 9:53:25	1	28	0	0	0	0	0	Occasional	170	73	25.2595	110	69	79	94	0.840426	66			16	16	48.9	5.25	94	363	0.64	3.27	1.38	1.56	71	12	2.53	177	3.69	42.9	96.79	14.01	6	102	3.269
103	2	2015-8-14 9:34:20	2	24	0	0	0	0	0	0	155	42	17.4818	112	64	60	83	0.722892	72			16	21	47.8	4.7	57	253	0.85	3.87	2.19	1.55	69	15	1.31	132	6.45	60.5	71.26	13	7	103	2.71556
104	2	2015-8-14 8:11:13	1	44	0	0	0	0	20yrs, 10/day	0	165	65	23.8751	117	64	82	92	0.891304	75			31	27	43.3	4.68	91	339	0.91	4.14	1.11	2.5	81	13	1.95	151	4.53	55	140.82	18.64	8	104	3.87712
105	2	2015-8-14 8:21:56	1	25	0	0	1	0	Occasional	Occasional	167	71	25.4581	120	82	80	97	0.824742	84			39	25	48.8	4.65	90.6	438	0.91	5.37	1.67	3.17	64	16	3.25	161	5.49	61.2	259.02	16.21	9	105	3.35007
106	2	2015-8-14 9:39:37	1	33	1	0	0	0	Occasional	often	176	80	25.8264	106	68	87	105	0.828571	72			31	21	48.1	4.47	111.7	482	1.78	4.85	1.14	2.68	62	29	2.16	160	7.42	55.5	67.45	24.21	10	106	4.80972
107	2	2015-8-14 9:20:41	1	30	0	0	0	0	11yrs,20/day	Occasional	165	75	27.5482	114	68	87	98	0.887755	78			26	21	47.2	4.51	88.4	553	1.36	5.47	1.26	3.33	111	22	3.55	162	5.2	54.8	158.18	15.01	11	107	3.00867
108	2	2015-8-14 8:27:50	1	35	0	0	1	0	0	Occasional	173	73	24.3911	113	80	84	104	0.807692	76			47	34	49.7	5.35	97	420	1.53	4.61	1.09	2.8	79	38	3.15	169	6.63	53.2	111.21			108	0
109	2	2015-8-14 8:12:04	1	38	0	0	1	0	0	Occasional	170	70	24.2215	106	69	79	96	0.822917	78			29	21	46.8	6.03	89	358	1.54	4.14	1.55	2	72	28	3.01	158	4.56	45.8	39.94	20.65	12	109	5.5342
110	2	2015-8-14 10:26:28	1	31	0	0	1	0	Occasional	Occasional	169	67	23.4586	100	66	79	94	0.840426	84			21	22	51.2	5.09	78	415	0.96	4.52	1.36	2.59	68	18	4.69	178	6.7	58.9	123.46	16.22	13	110	3.66932
111	2	2015-8-14 10:03:44	1	28	0	0	1	0	0	Occasional	169	66	23.1084	115	67	78	93	0.83871	72			14	21	50.3	5.58	98	382	0.63	4	1.48	2.22	69	16	5.56	160	3.84	39.8	262.94	13.73	14	111	3.40504
112	2	2015-8-14 8:57:11	1	32	0	0	0	0	Occasional	0	160	62	24.2188	114	73	76	93	0.817204	74			18	19	46.9	4.7	74	366	1.65	4.18	1.12	2.31	97	26	1.29	161	6.39	50.2	132.31	20.07	15	112	4.1924
113	2	2015-8-14 10:40:28	1	33	0	0	0	0	10yrs, 10/day	often	166	59	21.4109	96	60	74	90	0.822222	72	3.358	4.397	40	37	49	4.92	102	382	1.29	3.78	1.21	1.98	74	168	2.22	161	6.06	52.6	143.09	17.26	16	113	3.77419
114	2	2015-8-14 10:13:29	1	32	0	0	0	0	12yrs, 10/day	0	170	57	19.7232	107	69	71	87	0.816092	76			19	18	47.8	5.04	85.7	482	0.76	3.07	0.95	1.67	61	21	2.16	164	5.87	56.8	97.93	18	17	114	4.032
115	2	2015-8-14 10:16:24	1	37	0	0	1	0	Occasional	Occasional	172	62	20.9573	114	72	74	94	0.787234	72			20	27	48.6	4.96	69	415	0.66	3.98	1.7	1.96	71	10	2.79	148	2.94	52	117.67	13.7	18	115	3.02009
116	2	2015-8-14 10:03:15	1	48	0	0	1	0	21yrs, 20/day	Occasional	160	66	25.7812	107	72	82	94	0.87234	74	1.138	2.8	18	20	47.3	4.64	87	270	0.97	4.89	1.67	2.76	81	15	3.17	170	8.45	61.3	151.38	15.26	19	116	3.14695
117	2	2015-8-14 8:20:18	1	47	0	0	1	1	Occasional	Occasional	170	74	25.6055	106	69	88	96	0.916667	70			35	35	40.1	4.13	83	328	1.08	3.44	1.14	1.77	83	35	4.48	182	6.21	48.1	242.8	20.21	20	117	3.70966
118	2	2015-8-14 10:18:12	1	38	0	1	1	0	0	Occasional	174	70	23.1206	123	71	76	97	0.783505	84			34	29	48.2	5.41	94	380	1.95	4.82	1.44	2.61	56	15	4.89	141	5.4	56.1	155.01	18.46	21	118	4.4386
119	2	2015-8-14 8:40:24	1	35	0	0	0	0	Occasional	Occasional	165	84	30.854	145	102	92	108	0.851852	96			53	31	47.6	4.9	93	394	1.96	5.51	1.26	3.32	58	22	2.25	159	6.6	56.9	127.77	16.97	22	119	3.69569
120	2	2015-8-14 10:11:51	1	45	0	0	1	0	14yrs, 20/day	Occasional	170	63	21.7993	97	61	84	89	0.94382	66	-1.607	-0.042	18	21	45.1	4.87	85	274	2.44	5.35	1.19	3.16	57	17	3.68	154	5.39	54.2	144.45	13.8	23	120	2.98693
121	2	2015-8-14 9:49:54	2	44	1	0	0	0	0	0	157	52	21.0962	127	81	68	85	0.8	72			30	19	44.1	4.76	69	253	1.29	4.92	1.23	2.98	89	45	2.47	144	6.79	60.8	63.17	12.67	24	121	2.68041
122	2	2015-8-14 9:49:34	2	35	0	0	1	0	0	0	156	71	29.1749	115	83	83	103	0.805825	90			22	25	45.9	5.18	91.6	353	1.1	3.31	1.13	1.65	52	18	2.1	139	5.58	48	36.42	27.7	25	122	6.37716
123	2	2015-8-14 8:26:19	1	52	0	0	0	1	31yrs, 20/day	Occasional			#DIV/0!					#DIV/0!	84			18	20	45.1	4.61	95.2	361	2.08	4.64	1.03	2.61	81	29	4.13	165	10.4	59.2	130.95	17.07	26	123	3.49745
124	2	2015-8-14 10:31:04	2	45	0	0	0	0	Occasional	0	145	46	21.8787	151	88	70	83	0.843373	72	-0.253	0.507	21	17	43.7	6.1	50	378	0.87	5.78	2.73	2.74	60	30	4.3	155	12.77	80.7	52.11	17.25	27	124	4.67667
125	2	2015-8-14 8:15:51	1	50	0	0	0	1	0	Occasional	168	72	25.5102	112	65	98	101	0.970297	66			25	27	46	4.85	88	329	0.87	4.07	1.4	2.29	64	17	2.33	153	5.94	65	140.03	16.69	28	125	3.59762
126	2	2015-8-14 10:00:11	1	30		0	1	0	0	Occasional	164	65	24.1672	109	65	80	94	0.851064	72			79	48	47.7	5.15	89	460	1.12	5.25	1.7	3.1	94	44	2.78	152	6.64	50.7	118.13	13.03	29	126	2.98242
127	2	2015-8-14 8:35:08	1	34	0	1	1	0	17yrs, 8/day	Occasional	174	75	24.7721	124	79	85	105	0.809524	60			33	26	49	4.58	79	518	1.45	4.33	1.25	2.39	65	27	6.15	159	6.53	64.1	251.19	16.78	30	127	3.41566
128	2	2015-8-14 10:35:56	1	30	0	0	1	0	0	Occasional	162	64	24.3865	115	84	78	90	0.866667	84			25	21	49.1	5.16	100	405	2.49	3.31	0.74	1.6	111	14	3.44	163	4.94	57.3	192.45	13.47	31	128	3.08912
129	2	2015-8-14 9:58:32	1	43							168	69	24.4473	108	67	86	98	0.877551		-1.962	-0.467	15	19	44.7	5.54	89	355	1.53	5.29	1.24	3.39	103	18	3.22	157	5.25	56.7	164.48			129	0
130	2	2015-8-15 8:04:16	1	28	0	0	0	0	0	Occasional	168	55	19.487	125	78	72	89	0.808989	60			11	18	50.4	4.79	77	308	0.54	3.9	1.72	1.99	51	11	1.56	163	4.53	57.4	109.28	16.36	32	130	3.48286
131	2	2015-8-15 8:06:19	1	64	1	1	0	0	0	0	159	59	23.3377	109	73	80	92	0.869565	72			13	16	45.8	6.39	72	281	0.69	4.46	1.66	2.36	66	15	3.38	166	5.67	59.5	63.43	15.01	33	131	4.26284
132	2	2015-8-15 8:07:08	1	27	0	1	0	0	0	0	172	52	17.5771	115	88	63	86	0.732558	72			23	24	51.9	4.07	82	347	0.53	4.07	2.35	1.59	91	16	1.2	166	6.15	46.7	79.78	16	34	132	2.89422
133	2	2015-8-15 8:10:53	1	32	0	0	0	0	10yrs, 10/day	0	161	63	24.3046	110	67	78	93	0.83871	62	-0.03	0.951	29	22	51	4.78	94	325	1.81	6.73	1.34	4.44	59	12	4.19	156	7.57	60.8	94.07	17.33	35	133	3.68166
134	2	2015-8-15 8:13:27	2	51	0	0	1	0	0	0	153	50	21.3593	101	68	68	88	0.772727	78			15	18	46.9	5.11	72.2	259	1.46	6.23	1.81	3.73	65	27	3.49	141	7.63	58.2	27.72	17.09	36	134	3.88133
135	2	2015-8-15 8:15:14	1	64	1	0	0	0	14yrs, 2/day	Occasional	157	55	22.3133	142	74	83	89	0.932584	76			20	23	48.4	8.12	72	343	1.19	3.64	1.38	1.77	90	28	6.27	150	6.71	59.4	43.67	14.14	37	135	5.10297
136	2	2015-8-15 8:16:32	2	76	1	0	0	1	0	Occasional	154	47	19.8178	142	70	66	82	0.804878	72			15	24	43.3	4.82	74.5	253	0.61	5.17	2.57	2.34	82	13	2.78	130	7.68	46.8	47.65	13.97	38	136	2.99268
137	2	2015-8-15 8:18:43	1	30	0	0	0	0	Occasional	Occasional	162	61	23.2434	122	74	80	91	0.879121	68			23	17	52.7	4.65	78	305	1.22	4.02	1.38	2.2	84	19	2.58	169	4.67	56.4	117.79	14.21	39	137	2.93673
138	2	2015-8-15 8:20:49	1	62	1	0	0	0	40yrs, 10/day	Occasional	167	67	24.0238	136	84	87	99	0.878788	62			46	30	50.2	5.88	81	340	1.68	3.48	1.46	1.33	74	34	1.97	154	4.88	52.8	275.8	9.94	40	138	2.59765
139	2	2015-8-15 8:23:22	2	33	0	0	0	0	0	0	151	48	21.0517	107	73	67	85	0.788235	72			35	29	47	4.68	66.8	296	1.29	4.91	1.54	2.68	88	10	2.35	154	6.11	56.5	56.92	17.48	41	139	3.63584
140	2	2015-8-15 8:24:24	1	56	0	0	0	0	0	0	161	63	24.3046	115	67	84	93	0.903226	66	0.27	2.145	17	24	38.3	5.18	79.9	349	1.15	3.52	1.42	1.64	79	9	4.5	151	3.36	47	126.41	13.4	42	140	3.08498
141	2	2015-8-15 8:25:23	1	26	0	0	0	0	0	0	173	68	22.7204	113	67	79	88	0.897727	70			36	26	49.5	4.78	84	382	0.76	4.41	1.33	2.63	61	13	2.25	152	4.87	51.5	110.64	10.58	43	141	2.24766
142	2	2015-8-15 8:25:55	1	29	0	0	1	0	0	Occasional	160	63	24.6094	124	82	79	97	0.814433	68			22	23	46.2	5.24	93.7	445	1.28	3.4	1.18	1.57	71	22	1.73	149	4.56	58.8	126.64	13.83	44	142	3.22085
143	2	2015-8-15 8:26:50	1	48							170	75	25.9516	114	69	87	97	0.896907				25	21	45.4	5.3	96	525	1.37	6.04	1.61	3.66	65	21	2.75	158	4.94	59	146.95	16.94	45	143	3.99031
144	2	2015-8-15 8:28:05	2	43	0	0	1	0	0	0	150	47	20.8889	102	58	63	88	0.715909	66	1.865	2.528	15	18	43.8	4.75	64	245	0.52	3.65	1.57	1.86	57	6	2.14	124	5.49	60.9	37.88	12.33	46	144	2.603
145	2	2015-8-15 8:31:56	1	28	0	0	0	0	0	0	169	69	24.1588	115	72	86	99	0.868687	76	1.614	2.334	45	26	51	5.35	98	445	1.22	5.11	1.8	2.77	74	18	1.39	171	5.71	67.5	231.61	14.75	47	145	3.50722
146	2	2015-8-15 8:40:06	2	70	0	0	0	0	0	0	156	42	17.2584	128	71	65	85	0.764706	72			19	30	47.2	5.13	58	270	1.2	5.73	1.93	3.21	80	20	2.61	135	5.98	61.3	75.28	12.08	48	146	2.75424
147	2	2015-8-15 8:40:12	1	33	0	0	0	0	10yrs, 10/day	0	176	83	26.7949	112	76	88	100	0.88	72			40	24	48.7	4.5	82	367	1.15	5.12	1.39	3.07	75	29	4.27	160	5.89	45	229.37	13.52	49	147	2.704
148	2	2015-8-15 8:40:26	1	31	0	0	0	0	0	Occasional	172	73	24.6755	130	77	83	98	0.846939	60			13	20	49.5	5.13	101	320	1.05	4.38	1.48	2.45	105	13	1.99	156	5.53	57	142.75	14.28	50	148	3.25584
149	2	2015-8-15 8:38:46	1	30	0	0	0	0	8yrs,20/day	Occasional	171	69	23.597	112	72	81	99	0.818182	60	1.947	2.804	37	29	51.2	4.89	74	331	1.11	4.43	1.23	2.61	69	22	1.61	160	7.5	55.6	146.38	13.7	51	149	2.97747
150	2	2015-8-15 8:46:11	1	34	0	0	0	0	0	Occasional	173	71	23.7228	125	83	86	93	0.924731	70			60	32	44.4	4.94	73.2	276	0.93	4.09	1.37	2.19	69	21	2.94	149	4.53	53	145.7	13.91	52	150	3.05402
151	2	2015-8-15 8:46:52	2	23	0	0	0	0	0	0	158	43	17.2248	120	73	58	83	0.698795	78			137	400	50.4	5.16	66	291	0.82	4.39	1.91	2.1	95	28	2.3	142	5.42	54.7	79.91	10.86	53	151	2.49056
152	2	2015-8-15 8:48:24	1	31	0	0	1	1	0	Occasional	164	62	23.0518	122	72	77	96	0.802083	72			16	25	46.8	4.94	89.1	318	0.61	4.21	1.8	2.11	82	11	3.1	137	4.61	40.8	82.72	10.06	54	152	2.20873
153	2	2015-8-15 8:57:05	1	33	0	0	1	0	0	Occasional	160	57	22.2656	128	77	80	90	0.888889	72			20	23	47	4.8	73	371	2.69	5.18	1.15	2.98	75	36	1.96	150	9.02	50.7	139.23	13.21	55	153	2.81813
154	2	2015-8-15 8:58:54	1	26	0	0	0	0	0	Occasional	175	51	16.6531	106	74	63	87	0.724138	76			20	19	53.6	4.95	77	426	0.94	3.69	1.43	1.78	75	16	6.57	170	6.38	62.2	298.18	14.61	56	154	3.2142
155	2	2015-8-15 9:01:34	1	27	0	0	1	0	0	Occasional	172	62	20.9573	108	77	72	90	0.8	60			31	26	52.1	4.46	96	404	1.21	4.82	1.56	2.72	81	17	2.32	167	5.12	53.7	269.65	17.47	57	155	3.46294
156	2	2015-8-15 9:12:55	1	32	0	0	0	0	0	Occasional	174	64	21.1389	113	73	80	95	0.842105	62			20	31	49.1	4.98	89	317	1.19	6.15	1.77	3.58	70	32	6.3	169	5.9	61.3	130.16	14.4	58	156	3.1872
157	2	2015-8-15 9:15:34	1	29	0	0	0	0	0	Occasional	167	63	22.5896	100	62	77	90	0.855556	62			27	25	45.2	4.98	73.2	276	1.05	3.27	1.05	1.72	64	5	1.9	142	5.8	54.4	102.58	14.69	59	157	3.25139
158	2	2015-8-15 9:15:54	1	40	1	0	0	0	Occasional	Occasional	170	57	19.7232	115	63	76	92	0.826087	66			21	30	50.1	4.69	95.5	540	1.14	6.26	2.72	3.15	53	27	3.07	170	5.56	48.4	75.58	13.62	60	158	2.83901
159	2	2015-8-15 9:17:25	2	28	0	0	1	1	0	0	158	50	20.0288	89	59	62	92	0.673913	72			13	22	47.9	5.42	50	266	1.03	5.01	1.88	2.62	52	7	2.15	123	6.29	62.2	40.44	11.74	61	159	2.82804
160	2	2015-8-15 9:20:09	2	33	0	0	0	0	0	0	154	50	21.0828	118	74	66	88	0.75	78			15	18	44.2	4.99	61.7	292	0.62	4.46	2.15	2.07	58	23	1.98	132	7.15	60.3	85.33	11.21	62	160	2.48613
161	2	2015-8-15 9:21:05	1	34	0	0	1	0	13yrs, 10/day	Occasional	175	52	16.9796	105	71	68	87	0.781609	66			16	18	46.4	4.54	85.6	245	3	4.25	0.97	1.95	61	16	2.49	162	6.69	58	105.65	13.91	63	161	2.80673
162	2	2015-8-15 9:22:03	1	30	0	0	0	0	0	0	168	67	23.7387	118	63	85	98	0.867347	72			35	21	47.8	4.87	104.8	489	0.94	5.27	1.47	3.21	90	15	1.27	164	5.7	62.3	195.24	13.66	64	162	2.95663
163	2	2015-8-15 9:22:08	1	33	0	0	1	0	0	Occasional	166	73	26.4915	120	77	86	99	0.868687	70			26	19	51.2	5.55	88.8	471	3.27	5.4	1.04	2.92	80	24	1.8	167	7.38	62.5	238.88	24.17	65	163	5.96193
164	2	2015-8-15 9:24:50	1	23	0	0	0	0	0	Occasional	175	58	18.9388	109	72	70	91	0.769231	60			19	19	50.8	4.69	90	352	0.84	3.35	1.28	1.66	117	12	2.71	152	4.95	51.9	223.22	14.86	66	164	3.09748
165	2	2015-8-15 9:25:13	2	25	0	0	0	0	0	0	157	42	17.0392	92	58	60	76	0.789474	66	0.567	0.651	12	27	49.1	4.75	68.5	309	0.95	5.31	1.78	2.98	48	11	2.44	135	4.37	44.8	9.08	11.75	67	165	2.48056
166	2	2015-8-15 9:26:43	2	55	0	0	1	0	0	0	159	50	19.7777	101	69	66	89	0.741573	72			33	28	49.7	5.21	67.4	249	1.07	5.45	2.19	2.68	92	14	6.53	145	4.91	45.7	122.67	14.14	68	166	3.2742
167	2	2015-8-15 9:28:20	1	60	0	0	0	0	30yrs, 20/day	20yrs, 100g/day	166	73	26.4915	103	73	72	90	0.8	55	-0.17	1.793	9	19	44.9	4.58	70	316	0.66	4.99	2.11	2.33	72	17	2.52	152	7.88	57.5	128.57	11.21	69	167	2.28186
168	2	2015-8-15 9:34:11	1	32	0	0	0	0	0	Occasional	172	75	25.3515	129	76	84	99	0.848485	66			33	23	46.7	4.94	91	414	1.18	5.03	1.5	2.87	76	20	2.56	161	9.12	60.7	129.93	14.02	70	168	3.07817
169	2	2015-8-15 9:34:54	1	59	0	0	1	1	0	0	162	61	23.2434	114	75	82	89	0.921348	76			21	23	49.2	5.19	72	371	1.46	5.85	1.67	3.5	74	26	9	140	7.62	57.3	214.83	10	71	169	2.30667
170	2	2015-8-15 9:34:56	1	29	0	0	0	0	0	0	175	61	19.9184	103	70	78	90	0.866667	72	-0.182	0.608	36	32	53.3	5.17	83	291	1.7	5.45	1.38	3.26	71	34	2.9	171	5.12	52.7	147.74	12.95	72	170	2.97562
171	2	2015-8-15 9:36:53	1	27	0	0	0	0	Occasional	Occasional	175	68	22.2041	111	64	76	100	0.76	78			11	23	54.4	3.92	77	410	4.75	4.38	1.07	1.74	79	13	2.65	159	7.25	62	185.17	11.24	73	171	1.95826
172	2	2015-8-15 9:41:04	2	67	0	1	0	0	0	0	149	45	20.2694	137	74	73	86	0.848837	102			16	28	48.5	5.56	68	280	1.15	5.38	1.99	2.84	119	16	2.1	136	8.05	72.3	50.27	17.48	74	172	4.3195
173	2	2015-8-15 9:40:35	1	32	0	0	0	0	0	0	176	56	18.0785	102	68	70	88	0.795455	70			25	32	49.6	4.91	89.2	302	0.73	4.09	2.03	1.76	76	16	4.64	156	3.61	39.5	199.16	12.28	75	173	2.67977
174	2	2015-8-15 9:44:57	1	27	0	0	1	0	0	Occasional	169	49	17.1563	101	72	65	81	0.802469	62			14	24	50.6	4.61	80	414	0.88	4.28	1.75	2.11	53	12	2.12	162	7.91	57.9	136.06	14.25	76	174	2.91967
175	2	2015-8-15 9:44:29	1	60	0	0	0	0	40yrs, 20-30/day	often	168	78	27.6361	110	79	96	102	0.941176	60			34	36	44.6	5.31	77	391	0.81	5.7	1.93	3.15	79	69	2.48	145	6.6	55.2	155.23	12.46	77	175	2.94056
176	2	2015-8-15 9:47:12	1	29	0	0	0	0	0	Occasional	165	73	26.8136	129	70	73	92	0.793478	70			16	24	49.5	4.71	82	334	0.64	5.02	1.95	2.68	70	12	2.31	155	6.69	52.8	99.06	12.26	78	176	2.56643
177	2	2015-8-15 9:47:39	1	56	1	0	0	0	0	0	164	60	22.3081	107	67	83	94	0.882979	92			18	26	48.8	4.66	96	313	0.87	5.34	1.73	3.04	72	13	2.21	156	6.26	48	297.62	9.98	79	177	2.06697
178	2	2015-8-15 9:55:48	2	29	0	0	1	0	0	0	165	51	18.7328	95	61	66	88	0.75	84	2.866	3.034	12	15	47.3	4.95	48	251	0.42	3.27	2.16	1.02	55	37	0.85	133	4.76	58	135.26	12.24	80	178	2.6928
179	2	2015-8-15 9:59:51	1	28	0	0	0	0	0	Occasional	178	67	21.1463	116	70	80	94	0.851064	70			59	37	51.9	5.27	71.4	375	0.76	4.54	1.62	2.49	117	158	3.73	174	5.87	58	78.82	13.47	81	179	3.15497
180	2	2015-8-15 10:00:20	2	58	1	0	0	0	0	Occasional	152	63	27.268	131	81	87	96	0.90625	78			18	24	48.2	5.5	65	398	2.71	6.27	1.42	3.57	91	42	3.7	144	7.18	55.7	128.79	15.08	82	180	3.68622
181	2	2015-8-15 10:02:28	1	30	0	0	0	0	0	Occasional	169	80	28.0102	118	69	88	100	0.88	70			52	32	45.6	5.54	70	309	1.28	4.17	1.04	2.47	92	44	1.92	150	6.62	40.3	233.95	26.3	83	181	6.47564
182	2	2015-8-15 10:06:46	1	26	0	0	0	0	0	Occasional	169	74	25.9095	116	65	81	97	0.835052	60			12	26	50.3	5.12	84	431	1.02	3.97	2.23	1.51	58	21	2.44	159	6.59	47.4	137.36	28.31	84	182	6.4421
183	2	2015-8-15 10:07:50	2	33	0	0	0	0	0	0	158	64	25.6369	119	69	75	99	0.757576	76	0.189	0.466	31	32	49.9	5.1	69	372	0.66	3.3	1.63	1.38	74	48	1.3	117	9.19	72	12.83	18.04	85	183	4.08907
184	2	2015-8-15 10:10:31	1	29	0	0	1	0	3yrs, 5-10/day	Occasional	170	75	25.9516	119	70	89	101	0.881188	60			41	39	43	4.57	93.9	424	1.16	4.59	1.14	2.79	53	16	1.98	153	6.69	51.6	231.71	12.5	86	184	2.53889
185	2	2015-8-15 10:10:50	1	34	0	0	0	0	0	Occasional	163	63	23.7118	118	73	76	88	0.863636	60			27	26	48.6	5.16	90.7	383	1.16	5.92	1.5	3.69	64	33	3.28	161	5.12	51.5	309.69	10.35	87	185	2.3736
186	2	2015-8-15 10:25:46	1	22	0	0	0	0	4yrs, 10/day	Occasional	168	49	17.3611	113	72	68	80	0.85	60			11	18	49.1	4.61	71	313	0.7	3.28	1.49	1.45	100	5	3.19	163	7.41	56.9	164.03	11.73	88	186	2.40335
187	2	2015-8-15 10:29:31	2	27	0	0	0	0	0	0	150	48	21.3333	118	68	68	89	0.764045	80			13	16	52.2	4.97	35	300	1	4.48	1.54	2.45	52	20	1.09	126	5.46	44.8	31.46	13.84	89	187	3.0571
188	2	2015-8-15 10:29:39	2	27	0	0	1	0	0	0	158	48	19.2277	105	75	61	86	0.709302	70			19	21	45.2	4.65	57	256	0.87	4.17	1.93	1.96	54	12	4.31	128	5.43	51.2	47.94	11.74	90	188	2.42627
189	2	2015-8-15 10:31:22	1	28	0	0	0	0	0	Occasional	165	60	22.0386	114	77	70	86	0.813953	78			16	26	47.9	4.72	108.9	416	0.58	3.76	1.74	1.76	84	13	3.16	155	5.18	50	157.33	16.61	1	189	3.48441
190	2	2015-8-15 10:31:14	1	33	0	0	0	0	Occasional	Occasional	166	57	20.6852	130	79	71	87	0.816092	76			11	16	52.2	4.97	96	379	0.85	4.07	1.57	2.14	59	8	2.16	172	6.02	61.6	92.19	14.12	2	190	3.11895
191	2	2015-8-15 10:41:45	2	66	0	0	0	0	0	0	148	38	17.3484	135	77	63	77	0.818182	80	-1.644	0.413	24	34	50.5	7.48	65.1	301	0.95	4.8	2.36	2.12	64	10	2.81	137	5.47	69.9	74.72	12.47	3	191	4.14558
192	2	2015-8-17 8:10:24	2	28	0	0	0	0	0	0	163	53	19.9481	94	66	71	93	0.763441	88			20	23	47.1	4.67	58	282	2.26	4.77	1.61	2.28	56	11	3.23	141	7.36	52.2	153.38	13.96	4	192	2.89748
193	2	2015-8-17 8:18:59	2	35	0	0	0	0	0	0	160	56	21.875	103	66	74	95	0.778947	84			8	19	50.3	5.05	75	257.2	1.24	4.4	1.9	2.22	55	15	2.15	145	7.11	46.4	76.76	10.26	5	193	2.3028
194	2	2015-8-17 8:19:59	1	28	0	0	1	0	11yrs, 7/day	often	171	63	21.5451	110	72	77	93	0.827957	68			30	27	52.9	4.84	74	395	1.86	4.97	1.57	2.47	65	26	2.68	167	10.19	59.1	281.01	14.15	6	194	3.04382
195	2	2015-8-17 8:22:42	2	60	1	1	0	0	0	0	155	64	26.6389	140	81	93	96	0.96875	82	-1.607	0.042	32	23	48.4	5.77	55	289	1.91	4.82	1.73	2.28	99	53	4.51	136	5.21	57.4	184.65	14.6	7	195	3.74409
196	2	2015-8-17 8:30:47	1	30	1	0	0	0	12yrs, 20/day	Occasional	167	55	19.721	110	72	73	86	0.848837	84	0.01	0.867	24	27	50.5	4.82	67	375	2.96	4.58	1.48	2.09	73	52	3.22	147	8.17	55.8	343.31	12.65	8	196	2.70991
197	2	2015-8-17 8:32:55	2	33	0	0	1	0	0	0	156	58	23.833	102	57	79	96	0.822917	84	1.336	1.613	14	13	47.4	5.66	44	153	0.6	3.24	1.12	1.71	36	11	2.15	136	4.41	61.4	31.06	19.78	9	197	4.97577
198	2	2015-8-17 8:33:32	2	33	0	0	1	0	0	0	153	46	19.6506	114	56	62	88	0.704545	84			17	22	42.7	5.06	64	217	0.47	3.52	1.69	1.59	59	21	2.01	114	5.71	51.4	9.12	12.94	10	198	2.91006
199	2	2015-8-17 8:36:03	2	52							161	63	24.3046	100	60	83	94	0.882979				35	40	44.6	5.66	53.4	359	2.18	4.88	1.16	2.77	80	28	4.08	138	4.75	62.5	66.2	11.73	11	199	2.95075
200	2	2015-8-17 8:36:08	1	68	1	0	1	0	30yrs, 10/day	often	169	68	23.8087	142	90	83	96	0.864583	60	1.06	3.17	23	23	44.4	5.19	92.1	358	1.23	3.7	1.34	1.85	90	11	3.71	154	5.88	60.5	136.31	6.51	12	200	1.50164
201	2	2015-8-17 8:36:29	2	39		0	1	0	0	0	162	54	20.5761	106	78	62	92	0.673913	78			23	23	47.9	4.14	58	322	0.82	4.39	1.85	2.13	117	12	2.6	140	7.45	70.9	37.11	9.89	13	201	1.81976
202	2	2015-8-17 8:39:38	1	69	0	0	0	0	0	Occasional	173	71	23.7228	104	62	85	90	0.944444	70	-0.491	1.636	35	40	44.5	5.17	82.1	342	0.55	3.54	1.75	1.58	83	62	5.04				158.26	6.92	14	202	1.59006
203	2	2015-8-17 8:40:33	1	33	1	1	1	0	0	0	171	61	20.8611	111	80	75	93	0.806452	72			20	20	47.7	4.76	84	361	1.73	4.26	1.27	2.29	84	24	3.36	168	6.6	59.5	65.86	18.88	15	203	3.99417
204	2	2015-8-17 8:44:11	2	46	0	0	1	0	0	0	155	53	22.0604	97	63	67	91	0.736264	68	-0.93	-0.12	14	18	50	5.68	84	434	1.18	5.38	1.56	3.15	51	11	4.21	141	11.77	74.5	95.21	15.86	16	204	4.00377
205	2	2015-8-17 8:44:13	2	25	0	0	0	0	0	0	161	50	19.2894	102	61	68	90	0.755556	70			14	28	48.2	4.73	59	278	0.67	3.22	1.56	1.35	90	17	3.48	131	5.88	68.2	34.83	12.34	17	205	2.59414
206	2	2015-8-17 8:44:25	2	44	0	0	1	0	0	0	151	51	22.3674	92	58	79	88	0.897727	66	1.064	1.775	17	19	46.8	5.03	64	348	2.11	4.21	1.22	2.21	79	10	3.69	149	5.66	68.3	334.79	14.07	18	206	3.14543
207	2	2015-8-17 8:44:36	1	27	0	0	0	0	0	Occasional	173	65	21.7181	129	87	73	93	0.784946	69	3.856	4.502	19	22	54.8	5	86	355	0.81	6.64	1.62	4.11	56	18	1.88	168	4.87	44.2	149.2	12.3	19	207	2.73333
208	2	2015-8-17 8:52:46	1	67	1	0	1	0	0	Occasional	164	65	24.1672	98	61	87	97	0.896907	70	0.124	2.218	32	33	50.1	5.42	78	303	1.29	5.78	1.68	3.48	76	19	4.45	159	6.57	53.9	170.31	11.74	20	208	2.82804
209	2	2015-8-17 8:59:45	2	27	0	0	0	0	0	0	154	41	17.2879	95	58	59	84	0.702381	78			10	17	47.5	4.65	53	209	0.83	4.33	2.45	1.64	61	12	3.05	123	5.4	57.2	5.82	13.58	21	209	2.80653
210	2	2015-8-17 9:06:05	1	31	0	0	0	0	0	Occasional	171	60	20.5191	101	68	74	87	0.850575	78			20	22	51	5.26	77	416	0.81	4.02	1.62	2	105	14	8	142	6.41	51.6	298.04	10.76	22	210	2.51545
211	2	2015-8-17 9:14:32	1	43	0	0	1	0	0	10yrs, 50-100g/day	163	55	20.7008	120	74	74	91	0.813187	66			34	32	49.5	5.29	77.4	421	1.22	4.66	1.58	2.57	92	19	5.11	147	6.37	53.1	394.4	11.24	23	211	2.64265
212	2	2015-8-17 9:24:25	1	38	0	0	0	0	Occasional	Occasional	161	64	24.6904	118	80	81	93	0.870968	60			45	29	46.5	5.71	71	341	0.71	3.8	1.61	1.78	91	48	5.5	155	3.9	53	275.18	11.65	24	212	2.95651
213	2	2015-8-17 9:24:48	2	47	0	0	0	0	0	Occasional	157	60	24.3418	106	59	86	92	0.934783	76			23	28	45.5	4.47	54	283	1.13	4.53	1.46	2.54	53	14	1.71	130	5.71	60.5	24.57	9.13	25	213	1.81383
214	2	2015-8-17 9:27:34	2	46	0	0	0	0	0	0	160	47	18.3594	118	68	64	87	0.735632	80			11	25	51.6	5.47	62.4	269	1.23	4.69	1.75	2.42	46	13	3.19	118	8.3	74	115.07	11.99	26	214	2.9149
215	2	2015-8-17 9:28:55	1	47	1	0	0	0	11yrs, 20/day	0	169	85	29.7609	117	72	100	103	0.970874	70	-0.494	1.137	40	25	48.9	5.06	89	335	1.67	5.92	0.99	3.94	94	21	2.8	154	6.36	51.3	427.56	15.25	27	215	3.42956
216	2	2015-8-17 9:38:08	1	50	0	0	0	1	0	0	168	73	25.8645	114	66	89	96	0.927083	72	-0.958	0.763	48	38	45.6	6.37	96	341	0.49	3.61	1.26	2.01	75	31	2.36	128	5.42	76.5	254.57	13.61	28	216	3.85314
217	2	2015-8-17 9:47:07	2	25	0	0	0	0	0	0	159	48	18.9866	103	58	64	89	0.719101	78			12	16	48.7	4.93	57.7	288	0.46	3.45	1.97	1.34	60	9	3.55	134	5.45	44.7	26.42	17.76	29	217	3.89141
218	2	2015-8-17 9:48:12	1	44	0	0	1	0	23yrs, 10/day	Occasional	173	64	21.3839	99	60	77	92	0.836957	64	0.182	1.712	12	19	45.5	4.48	86	224	1.3	4	1.08	2.33	80	23	3.26	161	6.02	48.9	362.58	10.26	30	218	2.04288
219	2	2015-8-17 9:50:53	2	28	0	0	0	0	0	0	169	53	18.5568	118	76	63	87	0.724138	70	2.478	2.623	16	22	49.7	5.32	65	260	0.54	3.72	1.95	1.49	30	12	5.88	146	5.99	66.5	30.8	15.42	31	219	3.64597
220	2	2015-8-17 9:54:14	2	26	0	0	0	0	0	0	156	54	22.1893	108	71	71	89	0.797753	70			43	43	49.2	4.24	54	311	0.9	3.74	1.94	1.51	48	15	1.91	120	5.01	62.9	24.91	12.31	32	220	2.31975
221	2	2015-8-17 10:05:38	1	39	0	0	0	0	0	Occasional	179	79	24.6559	129	85	85	99	0.858586	70			24	22	47	5.49	76	399	2.2	5.32	1.07	3.22	46	36	3.69	156	8.7	64.3	139.56	15.33	33	221	3.74052
222	2	2015-8-17 10:06:27	1	43	1	1	0	0	20yrs, 10/day	Occasional	180	86	26.5432	149	96	91	97	0.938144	69	-0.111	1.383	33	21	48.4	4.76	89	382	2.6	4.83	1.18	2.63	63	41	3.18	172	4.8	56.4	487.62	15.37	34	222	3.25161
223	2	2015-8-17 10:09:25	2	33	0	0	1	0	0	0	158	49	19.6283	102	54	65	88	0.738636	56	1.324	1.601	21	23	45.8	5.69	63	293	1.24	5.26	2.24	2.33	56	22	3.58	132	4.19	58.2	40.15	10.56	35	223	2.67051
224	2	2015-8-17 10:09:44	1	43	0	1	0	0	0	Occasional	169	74	25.9095	106	70	92	97	0.948454	60	-0.224	1.27	49	35	46.4	5.18	83	421	0.94	3.37	1.28	1.61	56	31	4.16	163	5.84	63.8	390.81	11.42	36	224	2.62914
225	2	2015-8-17 10:10:09	1	47	0	1	1	0	30yrs, 40/day	Occasional	167	73	26.1752	140	92	92	97	0.948454	63	0.38	2.011	25	22	44.9	5.14	84	463	4.21	5.68	1	3.17	50	25	2.92	143	6.28	60.2	348.68	13.83	37	225	3.15939
226	2	2015-8-17 10:12:45	2	47	1	1	1	0	0	Occasional	160	52	20.3125	112	55	76	91	0.835165	72	2.928	3.791	15	18	45.6	5.03	63	186	0.71	5.1	2.26	2.51	52	25	7.34	132	5.57	64.3	55.45	5.68	38	226	1.2698
227	2	2015-8-17 10:20:34	2	52	0	1	1	0	0	0	153	59	25.204	171	85	82	93	0.88172	64	1.587	2.73	33	32	46.1	5.51	73	276	1.67	5.59	1.45	3.38	90	20	1.27	142	5.57	41.8	98	16.12	39	227	3.94761
228	2	2015-8-17 10:20:46	1	38	0	0	1	0	0	Occasional	167	65	23.3067	114	80	80	94	0.851064	78	-1.422	-0.131	22	20	50.7	5.63	92	381	0.92	4.98	1.39	3.01	69	17	3.87	163	8.33	65.9	31.14	16.79	40	228	4.20123
229	2	2015-8-17 10:23:22	1	52	0	0	1	0	0	Occasional	166	68	24.677	118	73	83	95	0.873684	66			29	20	46.9	5.15	73	422	1.31	4.78	1.42	2.63	55	128	3.94	157	6.09	43.4	274.73	8.61	41	229	1.97073
230	2	2015-8-17 10:54:03	1	35	0	0	1	0	15yrs, 20/day	often	169	62	21.7079	133	76	77	86	0.895349	75	0.663	1.809	71	52	50.3	4.71	65	414	1.75	3.34	1.26	1.45	78	289	4	162	5.96	48	262.73	14.19	42	230	2.97044
231	2	2015-8-17 10:56:10	2	42	0	0	0	0	0	0	154	47	19.8178	112	66	67	86	0.77907	64	0.526	1.143	12	19	44.3	4.27	68	280	0.42	4.34	2.14	1.92	78	13	5.13	154	3.68	59.8	19.52	11.13	43	231	2.11223
232	2	2015-8-17 10:58:20	1	39	1	0	0	0	20yrs, 20/day	often	170	73	25.2595	186	118	83	94	0.882979	88	0.114	1.449	180	270	51.1	4.87	122	484	1.57	3.11	1.09	1.32	71	274	4.71	166	4.58	64.2	425.32	8.87	44	232	1.91986
233	2	2015-8-17 10:59:08	1	52	0	0	0	0	Occasional	20yrs, 100g/day	165	64	23.5078	116	71	78	94	0.829787	69	-1.539	0.237	22	21	44.2	5.57	64	291	0.8	6.87	2.04	4.29	71	37	3.12	152	4.16	66.6	241.12	8.74	45	233	2.16364
234	2	2015-8-17 10:59:15	2	50	1	1	1	0	0	Occasional	159	64	25.3155	106	61	86	100	0.86	72	-2.093	-1.066	38	29	45.9	5.28	81	368	1.1	5.28	1.71	2.91	64	16	2.85	136	5.81	70.2	242.02	17.9	46	234	4.20053
235	2	2015-8-17 11:01:08	1	49	0	0	1	0	31yrs, 20/day	31yrs, 150-200g/day	163	70	26.3465	105	66	92	94	0.978723	68			25	29	47.4	5.24	95.1	546	6.52	6.87	1.04	2.73	106	36	4.59	154	5.08	64.5	319.1	21.96	47	235	5.11424
236	2	2015-8-17 11:03:42	2	47	1	0	1	0	0	0	156	54	22.1893	155	97	73	90	0.811111	76	0.207	1.069	21	20	48.8	5.76	71	281	1.02	4.36	1.79	2.16	79	17	2.2	140	8.33	67.1	14.4	12.35	48	236	3.1616
237	2	2015-8-17 11:04:40	2	48	0	0	0	0	0	0	155	52	21.6441	101	62	69	92	0.75	66	-0.93	-0.014	55	37	47	5.44	67	276	1.02	4.74	1.89	2.43	90	16	3.79	143	5.59	46.7	148.51	10.94	49	237	2.64505
238	2	2015-8-17 11:21:34	2	41	1	0	1	0	0	0	160	53	20.7031	108	63	70	92	0.76087	74			14	18	44.5	4.64	57	289	0.61	5.23	1.74	2.95	46	19	2.26	154	7.79	57.5	148.16	12.14	50	238	2.50354
239	2		1	59	1	0	0	0	30yrs, 10-20/day	Occasional	166	65	23.5883	135	74	86	97	0.886598	59	2.933	4.876	27	21	44.2	5.33	165	645	2.23	6.01	1.04	3.63	138	42	4.35	160	5.31	63	130.86	9.17	51	239	2.17227
240	2		1	41	0	0	1	0	12yrs, 2/day	0	176	65	20.984	120	79	76	95	0.8	66	-0.748	0.67	24	20	46.7	5.23	97	313	1.44	3.97	1.03	2.19	78	17	9.25	143	7.01	48.3	172.55	12.43	52	240	2.88928
241	2		2	37	0	0	1	0	0	0	155	52	21.6441	102	61	68	93	0.731183	63	1.065	1.477	9	35	48.1	5.24	61	313	0.56	3.59	1.65	1.65	43	12	2.13	124	5.35	59.5	11.36	10.99	53	241	2.55945
242	2		1	39	0	0	1	0	17yrs, 20/day	Occasional	175	76	24.8163	135	85	90	97	0.927835	60	-0.834	0.501	31	27	44.6	5.92	79	440	5.27	4.84	0.95	1.55	89	25	4.48	158	5.51	56.5	328.96	13.45	54	242	3.53884
243	2		2	28	0	0	0	0	0	0	163	51	19.1953	99	68	66	92	0.717391	68			16	22	48	4.97	53	253	1.79	4.41	1.47	2.32	73	12	3.56	143	5.39	47.5	28.04	9.59	55	243	2.11832
244	2	2015-8-18 9:34:01	2	59	0	0	1	0	0	0	161	55	21.2183	110	62	78	91	0.857143	80	-1.238	0.345	17	19	48.4	5.27	49	344	1.27	5.2	1.52	3.01	77	23	2.78	125	5.57	63.9	184.65	8.96	56	244	2.09863
245	2	2015-8-18 11:08:41	2	63	1	0	1	0	0	Occasional	159	63	24.9199	164	90	84	98	0.857143	72	0.795	2.646	17	23	45.9	6.02	78	329	1.76	6.43	1.5	3.86	87	17	2.9	149	6.26	58.2	292.21	17.58	57	245	4.70363
246	2	2015-8-18 10:58:16	1	52							171	65	22.2291	145	96	80	95	0.842105				16	24	50.9	5.24	62	372	2.43	6.01	1.7	3.32	85	74	3.29	172	4.66	54.3	404.26	11.43	58	246	2.66192
247	2	2015-8-18 8:39:58	2	48	0	0	0		0	0			#DIV/0!					#DIV/0!	76	-1.433	-0.516	10	19	45	3.68	69	200.1	1.28	3.52	1.26	1.77	48	12	2.15	89	4.44	61.9	9.27	7.36	59	247	1.20377
248	2	2015-8-18 10:59:26	1	39	0	1	0	0	0	Occasional	163	66	24.841	129	81	79	91	0.868132	69	1.918	3.253	22	21	51.8	5.45	69	315	2.35	3.76	0.9	1.95	69	26	4.48	151	5.18	62.1	90.57	13.79	60	248	3.34024
249	2	2015-8-18 9:23:58	2	26	0	0	1	0	0	0	156	47	19.313	103	57	62	85	0.729412	82			14	16	48	5.12	61	350	1.05	4.07	1.62	1.96	59	12	1.58	124	5.69	54.5	27.88	13.84	61	249	3.14937
250	2	2015-8-18 9:24:37	2	43	0	0	0	0	0	0	160	48	18.75	97	56	67	89	0.752809	72			15	23	47.5	5.04	60	241	0.86	4.38	1.76	2.11	63	6	2.69	149	7.93	55.3	34.52	10.87	62	250	2.43488
251	2	2015-8-18 11:06:22	2	51	0	0	0	1	0	0	154	55	23.1911	132	76	75	92	0.815217	67			34	34	44.4	5.93	72	303	1	7.07	2.25	4.16	96	80	5.92	155	6.42	62.3	166.72	10.29	63	251	2.71199
252	2	2015-8-18 9:16:28	1	45	0	0	0	0	10yrs, 15/day	0	178	63	19.8839	108	68	76	93	0.817204	68	-1.786	-0.221	16	16	52.8	5.52	68	347	1.27	4.48	1.76	2.2	62	20	3.53	153	4.91	59.5	412.77	3.11	64	252	0.762987
253	2	2015-8-18 11:04:28	1	28	0	0	0	0	10yrs, 10/day	Occasional	172	55	18.5911	107	69	70	88	0.795455	66			16	26	51.7	5	81.7	305	1.36	4.61	1.82	2.53	49	18	3.38	162	5.51	50.6	254.12	11.12	65	253	2.47111
254	2	2015-8-18 9:03:45	1	33	1	0	0	0	10yrs, 20/day	Occasional	173	60	20.0474	128	76	76	87	0.873563	70	-0.164	0.874	10	21	50.9	4.59	80	276	2.17	5.69	1.57	3.08	71	17	4	162	8.63	56.1	203.03	8.25	66	254	1.683
255	2	2015-8-18 11:01:07	1	28	0	0	0	0	9yrs, 10/day	often	167	67	24.0238	118	62	77	95	0.810526	60	2.3	3.02	33	24	45.8	4.47	93.7	320	1.53	5.45	1.33	3.62	50	31	1.74	163	5.64	55.1	124.82	11.96	67	255	2.37605
256	2	2015-8-18 8:15:19	1	58	1	0	1	0	31yrs, 5/day	Occasional	167	61	21.8724	103	72	75	90	0.833333	60			23	23	47	4.44	72	410	1.73	4.37	1.6	2.18	95	35	3.62	159	4.96	52.6	195.85	8.41	68	256	1.65957
257	2	2015-8-18 9:09:48	2	33									#DIV/0!					#DIV/0!		0.573	0.85	28	24	46.1	4.99	75	342	1.19	4.07	1.7	1.84	36	14	3.6	144	6.5	59.1	38.01	10.97	69	257	2.4329
258	2	2015-8-18 9:08:03	1	51	0	0	0	0	10yrs, 40/day	often	164	78	29.0006	133	85	99	100	0.99	70			30	28	47.4	4.77	74.8	483	1.61	4.57	1.1	2.82	61	38	6.34	175	7.09	58.1	175.24	无	无	258	#VALUE!
259	2	2015-8-18 10:32:33	2	52	0	0	1	0	0	0	162	52	19.8141	85	61	65	88	0.738636	76	0.482	1.625	31	31	44.6	5.57	63	288	2.99	6.56	1.89	3.51	97	124	3.99	144	3.79	35.6	107.75	6.03	70	259	1.49276
260	2	2015-8-18 10:05:51	1	28	0	1	0	0	0	Occasional	172	81	27.3797	118	79	100	100	1	72	0.591	1.311	33	26	49.6	4.87	73	368	1.42	4.79	1.4	2.63	50	26	2.07	156	6.04	60.1	116.69	18.34	71	260	3.96959
261	2	2015-8-18 10:00:16	2	41	0	0	1	1	0	0			#DIV/0!	96	60			#DIV/0!	68	2.593	3.167	12	19	42.3	4.28	54.7	287	0.56	3.99	1.9	2	43	14	2.54	122	4.84	63.1	13.35	11.43	72	261	2.17424
262	2	2015-8-18 10:15:46	1	29	0	0	0	0	5yrs, 7/day	Occasional	168	72	25.5102	130	93	84	100	0.84	63	0.401	1.191	350	175	46.2	5.36	64	445	0.98	4.2	1.24	2.32	83	82	9.48	164	4.13	46	388.12	15.08	73	262	3.59239
263	2	2015-8-18 10:58:42	1	54	0	1	1	0	0	0	171	59	20.1771	121	71	74	87	0.850575	72			23	25	43	5.14	86	254	0.97	5.04	2.18	2.33	62	12	1.91	159	3.97	57.1	76.51	5.21	74	263	1.1902
264	2	2015-8-18 11:01:03	2	49	0	0	0	0	0	0	164	61	22.68	91	56	82	100	0.82	62	2.038	3.001	13	19	42.5	5.61	62	186	0.91	5.15	1.84	2.85	47	11	4.75	134	4.78	54.8	8.81	5.23	75	264	1.30401
265	2	2015-8-18 10:09:32	1	24	0	0	0	0	0	0	182	77	23.246	123	85	81	97	0.835052	60	-0.253	0.145	11	15	51.4	5.35	93	468	0.63	3.88	1.17	2.26	62	15	2	159	4.79	65.1	110.77	9.1	76	265	2.16378
266	2	2015-8-18 8:54:56	1	16	0	0	1	0	1yr,5/day	Occasional	170	50	17.301	104	60	63	84	0.75	69			13	20	50.1	4.86	79.4	401	0.78	3.37	1.24	1.76	88	9	1.46	151	5.36	53.5	122.61	12.73	77	266	2.74968
267	2	2015-8-18 11:01:34	1	40	0	1	0	0	20yrs, 5/day	Occasional	177	77	24.5779	110	67	81	101	0.80198	56	0.276	1.654	46	38	45.1	4.95	85	367	0.92	4.49	1.22	2.65	67	29	3.93	161	6.78	58.9	357.2	8.16	78	267	1.7952
268	2	2015-8-18 9:20:41	1	30	0	0	0	0	11yrs, 3-4/day	Occasional	174	72	23.7812	131	87	83	92	0.902174	76			99	54	51.8	5.45	69	584	1.55	5.14	1.75	2.62	79	314	5.14	162	9.08	65.7	377.37	16.54	79	268	4.00636
269	2	2015-8-18 11:06:35	2	24	0	0	0	0	0	0	160	50	19.5312	102	60	65	92	0.706522	84			9	13	46.4	4.7	64	202	0.86	3.45	1.61	1.57	46	9	2.21	123	7.31	63.8	76.9	10.88	80	269	2.27271
270	2	2015-8-18 9:38:50	2	47	0	0	1	0	0	0	158	58	23.2335	108	62	78	93	0.83871	66	-1.148	-0.286	14	18	42.8	4.81	64.9	239	1.92	5.47	1.56	3.14	53	13	2.4	139	7.4	63.7	73.61	12.13	81	270	2.59312
271	2	2015-8-18 10:59:10	1	50	1	0	1	0	31yrs, 20/day	often	165	70	25.7117	117	70	91	94	0.968085	72			22	25	51.1	5.28	71	458	2.04	4.5	1.59	2.13	64	37	9.47	149	5.88	56.3	156.03	10.67	82	271	2.50389
272	2	2015-8-18 9:49:12	1	59	0	0	0	0	0	Occasional	171	71	24.281	124	84	86	96	0.895833	70	0.438	2.381	18	23	44.7	5.66	69	288	0.79	4.59	1.28	2.72	75	12	3.96	146	6.64	57.8	124.79	11.47	83	272	2.88534
273	2	2015-8-18 8:49:52	2	37	0	0	0	0	0	0	173	69	23.0546	109	74	80	96	0.833333	84	1.798	2.21	22	22	49.7	5.74	58	244	0.66	4.39	1.98	1.99	62	22	1.97	152	7.97	82.1	42.13	14.18	84	273	3.61748
274	2	2015-8-18 10:24:30	2	44	0	0	0	1	0	0	154	43	18.1312	103	58	60	84	0.714286	76	4.207	4.918	14	20	46.1	4.96	71	254	1.13	4.47	1.8	2.17	49	13	3.55	135	5.26	62.3	132.05	10.76	85	274	2.37198
275	2	2015-8-18 10:24:32	2	62	0	0	1	1	0	0	156	50	20.5457	118	73	65	88	0.738636	72	-2.196	-0.413	14	17	47.7	5.01	68	180	0.66	3.58	1.41	1.77	73	6	2.56	129	4.92	60.6	83.84	19.55	1	275	4.35313
276	2	2015-8-18 8:29:47	2	61	0	0	1	0	0	0	165	51	18.7328	98	52	74	88	0.840909	72	-2.475	-0.759	22	26	47.6	4.56	66	215	1.16	7.03	2.54	4.02	104	11	5.33	131	4.45	37.5	110.14	18.05	2	276	3.65813
277	2	2015-8-18 11:05:06	1	46	0	1	1	0	10yrs, 10/day	Occasional			#DIV/0!					#DIV/0!	76	-1.673	-0.074	16	21	50.5	5.24	94	362	1.57	4.97	1.59	2.56	61	14	4.44	160	5.5	61.4	111.23	19.91	3	277	4.63682
278	2	2015-8-18 10:23:41	1	27	0	0	0	1	9yrs, 10/day	Occasional	165	62	22.7732	98	73	75	90	0.833333	66			16	24	50	4.87	95	404	2.17	5.09	1.21	2.92	73	14	3.07	161	5.23	54.3	180.3	20.44	4	278	4.42412
279	2	2015-8-18 8:17:46	1	44	0	0	0	0	30yrs, 20/day	Occasional	182	94	28.3782	130	89	98	104	0.942308	72	0.69	2.221	26	25	47.8	5.26	78.3	400	2.9	5.07	1.01	2.79	78	58	3.42	163	7.23	58.4	284.78	19.83	5	279	4.63581
280	2	2015-8-18 11:02:09	1	42	0	0	1	1	30yrs, 20/day	Occasional	169	67	23.4586	146	98	82	92	0.891304	72	-0.512	0.945	20	19	50.2	5.24	74	573	2.39	6.42	0.9	4.16	85	38	3.47	164	11.57	51.6	125.48	24.37	6	280	5.6755
281	2	2015-8-18 10:20:40	2	44	0	0	1	0	0	0	153	50	21.3593	97	70	68	89	0.764045	64	-0.121	0.59	16	19	43	5.05	70	297	0.78	4.3	1.75	2.09	65	12	2.03	119	7.78	76.1	61.51	17.81	7	281	3.99736
282	2	2015-8-18 9:27:43	1	45	0	0	0	0	30yrs, 20/day	Occasional	169	68	23.8087	114	65	83	93	0.892473	62	-0.419	1.146	22	23	49.9	4.72	84	309	1.81	4.05	1.06	2.07	105	29	2.73	160	7.82	57.4	263.28	20.53	8	282	4.30674
283	2	2015-8-18 11:03:10	1	40	0	0	1	1	23yrs,16/day	Occasional	168	66	23.3844	132	84	81	94	0.861702	68	0.997	2.374	15	29	51.7	5.35	70	338	0.93	4.49	1.72	2.23	58	20	5.33	148	3.4	52.3	133.29	21.06	9	283	5.0076
284	2	2015-8-18 9:15:44	2	34	0	0	0	0	0	0	153	50	21.3593	98	71	71	92	0.771739	64	-1.261	-0.953	22	27	51.1	5.66	71	313	0.7	5.05	1.67	2.85	44	16	11.42	141	5.16	58.8	69.13	25.26	10	284	6.35429
285	2	2015-8-18 11:00:18	2	62	1	0	0	0	0	0	158	60	24.0346	150	85	89	90	0.988889	80	-1.075	0.709	17	23	46.3	5.37	58	213	1.21	3.78	1.15	2.02	96	17	4.12	140	6.06	68.5	300.3	18.8	11	285	4.48693
286	2	2015-8-18 11:00:55	1	46	0	0	1	0	20yrs, 20/day	often	172	66	22.3094	99	67	79	92	0.858696	64	1.476	3.075	24	29	47.5	5.13	78	431	1.73	4.89	1.62	2.56	58	104	5.95	152	5.44	47.3	220.9	20.24	12	286	4.61472
287	2	2015-8-18 10:03:56	1	27	0	0	0	0	0	0	171	58	19.8352	111	74	71	92	0.771739	60			13	18	51	4.95	79	369	0.58	3.39	1.49	1.67	57	18	2.78	167	5.4	64	97.4	24.18	13	287	5.3196
288	2	2015-8-18 8:40:26	2	56	1	1	1	1	0	0	155	57	23.7253	134	70	73	91	0.802198	66	1.547	2.935	12	20	42.2	5.39	79	364	1.38	5.07	1.81	2.62	86	12	1.93	120	5.37	45.3	68.18	25.03	14	288	5.99608
289	2	2015-8-18 8:47:06	1	41	0	0	0	0	Occasional	often	164	62	23.0518	108	67	76	95	0.8	64			22	24	47.4	4.81	80	408	1.13	5.17	1.63	3.06	58	14	2.58	154	6.12	57.8	249.55	20.75	15	289	4.43589
290	2	2015-8-18 10:19:22	2	42	1	0	1	0	0	0	163	64	24.0882	112	76	76	95	0.8	82	1.238	1.856	12	19	47.2	5.12	53	285	1.84	6.39	1.62	3.8	78	15	3.38	148	6.91	57.8	111.92	18.34	16	290	4.17337
291	2	2015-8-18 9:24:18	1	28	0	0	0	0	0	Occasional	161	59	22.7615	116	67	74	93	0.795699	88			16	17	48.7	5.06	79	382	1.69	4.56	0.96	2.89	70	8	2.18	161	5.49	44.7	159.18	15.58	17	291	3.50377
292	2	2015-8-18 11:06:43	1	64	1	0	0	0	40yrs, 15/day	often	163	60	22.5827	154	74	80	87	0.91954	80	-2.423	-0.382	14	20	49.5	6.11	76	383	1.48	6.2	1.27	3.9	106	26	4.02	155	8.35	65.6	257.31	19.1	18	292	5.18671
293	2	2015-8-18 10:23:06	2	27	0	0	0	0	0	Occasional	158	50	20.0288	94	63	65	90	0.722222	72	0.477	0.6	8	16	50.8	4.66	64	244	0.73	4.18	1.94	1.96	60	10	1.84	145	7.38	61.6	91.92	17.49	19	293	3.62237
294	2	2015-8-18 9:11:24	2	41	0	0	1	0	0	0	165	59	21.6713	110	69	79	94	0.840426	68	-1.41	-0.837	14	15	44.2	4.98	77.4	292	0.82	3.5	1.74	1.43	36	9	3.07	131	4.58	62.6	50.42	21.67	20	294	4.79629
295	2	2015-8-18 10:15:54	2	52	0	0	0	0	0	0	156	61	25.0657	100	68	89	92	0.967391	84	0.094	1.237	23	29	46.1	6.29	58	282	1.3	5.38	1.44	3.22	93	34	1.5	142	7.03	42.1	95.34	22.74	21	295	6.35709
296	2	2015-8-18 11:04:58	1	61	0	0	1	0	0	Occasional	185	80	23.3747	119	68	84	97	0.865979	64	0.962	2.945	29	23	46.1	5.74	91	408	0.71	4.95	1.46	3.02	75	35	4.52	164	7.33	59.6	250.15	19.51	22	296	4.97722
297	2	2015-8-18 9:25:28	1	37	0	0	1	0	0	0	169	61	21.3578	124	92	82	92	0.891304	72			25	21	48.3	4.51	99	423	1.63	4.29	1.31	2.25	75	28	6.49	157	9.55	65.1	265.07	18.62	23	297	3.73228
298	2	2015-8-18 8:25:54	2	53	0	0	0	0	0	0	162	60	22.8624	104	66	77	92	0.836957	76	2.824	4.027	14	17	44.3	5.12	58	237	1.1	3.36	1.15	1.7	52	10	3.64	135	6.89	60.9	40.11	19.65	24	298	4.47147
299	2	2015-8-18 8:38:31	2	42	0	0	1	0	0	0	163	51	19.1953	117	72	69	91	0.758242	76	-1.48	-0.863	17	22	48.5	5.09	71	290	0.96	4.99	1.42	2.91	43	9	1.33	111	4.13	47	5.38	22.86	25	299	5.17144
300	2	2015-8-18 10:17:49	1	25	0	1	1	0	Occasional	Occasional	178	73	23.04	115	72	78	93	0.83871	68	0.111	0.596	14	23	46.3	4.43	83.1	404	1.48	4.89	1.55	2.8	72	14	1.76	165	6.72	63	238.81	15.78	26	300	3.10691
301	2	2015-8-18 10:49:46	2	46	0	0	1	0	0	0	154	50	21.0828	73	45	71	88	0.806818	68			5	13	44.1	4.44	55	292	0.49	3.56	1.43	1.85	55	11	3.5	95	3.77	56.7	7.76	15.21	27	301	3.00144
302	2	2015-8-18 9:07:01	2	46	0	0	1	0	0	0	155	51	21.2279	97	69	81	91	0.89011	68			34	31	46.2	5.07	57	305	1.52	5.13	2.05	2.44	92	41	3.54	134	5.57	57.7	97.67	20.06	28	302	4.52019
303	2	2015-8-18 11:04:41	1	28	0	0	0	0	10yrs, 10/day	Occasional	170	62	21.4533	120	72	71	91	0.78022	70			12	18	48.4	4.59	60	384	1.52	4.24	1.5	2.22	58	23	2.7	166	7.03	58.2	176.72	18.91	29	303	3.85764
304	2	2015-8-18 9:38:05	1	31	0	0	1	0	0	Occasional	168	71	25.1559	125	73	84	98	0.857143	65			23	22	51.5	5.35	78	327	1.31	3.33	1.26	1.62	55	9	3.66	155	5.06	72	331.94	19.8	30	304	4.708
305	2	2015-8-18 9:43:35	1	27	0	0	0	0	7yrs, 10/day	0	171	83	28.3848	116	85	92	101	0.910891	64	-0.924	-0.278	73	33	51.9	4.01	73	412	1.24	4.75	1.4	2.56	96	52	3.85	175	6.93	69.8	229.85	18.74	31	305	3.33988
306	2	2015-8-19 8:13:09	2	26	0	0	0	0	0	0	164	59	21.9363	108	64	70	99	0.707071	80			10	19	49.2	5.44	48	199	2.08	4.54	1.47	2.4	67	16	1.33	142	7.14	65.6	21.62	21.01	32	306	5.07975
307	2	2015-8-19 8:14:38	1	32	0	0	0	0	0	Occasional	157	67	27.1816	116	80	82	97	0.845361	76			36	24	48.7	5	82	373	1.92	4.61	1.17	2.69	79	27	3.49	154	5.02	56.9	无血	无	无	307	#VALUE!
308	2	2015-8-19 8:18:44	1	34	0	0	1	0	9yrs, 20/day	Occasional	177	58	18.5132	107	67	69	85	0.811765	88			32	26	49.6	5.06	64	309	1.05	5.46	1.9	3.07	66	37	1.96	158	4.83	44.5	120.82	24.25	34	308	5.45356
309	2	2015-8-19 8:18:50	2	43	0	0	0	1	0	0	154	48	20.2395	109	60	76	90	0.844444	72	1.316	1.979	18	24	43.8	4.77	56	226	0.73	4.69	1.84	2.5	70	13	2.6	126	4.35	48.8	38.08	18.9	35	309	4.0068
310	2	2015-8-19 8:19:11	1	29	0	0	1	0	2yrs, 20/day	11yrs	172	67	22.6474	94	60	76	96	0.791667	70			14	18	48.9	4.96	76	400	2.16	5.06	1.1	3.15	68	14	15.62	160	6.08	57.1	204.78	11.04	36	310	2.43371
311	2	2015-8-19 8:19:33	1	40	0	0	0	0	21yrs, 20/day	Occasional	168	81	28.699	112	79	87	102	0.852941	76	1.782	3.16	49	32	45.8	5.23	93	371	2.25	5.14	1.39	2.7	110	41	2.63	168	10.4	64.1	312.84	19.07	37	311	4.43272
312	2	2015-8-19 8:20:47	1	50	0	0	1	1	31yrs, 10/day	0	162	55	20.9572	115	73	73	88	0.829545	70	-2.005	-0.284	16	18	46.5	4.51	76	286	1.28	4.55	1.47	2.51	97	13	4.8	152	5.15	61.9	77.93	21.37	38	312	4.2835
313	2	2015-8-19 8:22:58	2	44	0	0	0	0	0	0	161	62	23.9188	121	73	71	97	0.731959	70			19	22	46.8	5.17	94	362	0.59	4.61	2.4	2.02	70	16	1.98	127	5.2	58.3	78.88	19.95	39	313	4.58407
314	2	2015-8-19 8:23:51	2	45	0	0	1	0	0	0	148	45	20.5442	113	68	63	84	0.75	60	-0.908	-0.147	19	24	45.5	4.16	58	228	1.14	4.61	1.7	2.43	70	14	2.41	138	6.96	58.2	28.78	18.21	40	314	3.36683
315	2	2015-8-19 8:24:49	1	27	0	0	1	0	0	Occasional	169	85	29.7609	116	79	91	103	0.883495	66	2.39	3.036	37	26	52.7	4.78	82	606	1.09	4.17	1.25	2.3	83	16	2.63	154	6.06	65.7	278.21	18.92	41	315	4.01945
316	2	2015-8-19 8:25:12	1	26	0	0	1	0	0	0	172	57	19.2672	124	77	67	89	0.752809	68			12	24	54.2	4.61	75	412					55	27		164	4.52	58.2	82.47	19.08	42	316	3.90928
317	2	2015-8-19 8:26:58	2	60	0	0	0	0	0	0	154	58	24.4561	94	60	87	93	0.935484	66	-1.611	0.037	23	15	48.2	5.5	67	319	5.66	6.44	1.33	2.91	123	62	2.33	138	5.96	45.1	153.7	18.34	43	317	4.48311
318	2	2015-8-19 8:31:05	1	23	0	0	0	0	0	0	167	48	17.2111	111	80	64	85	0.752941	72			13	17	52.4	4.96	79	485	0.65	3.61	1.62	1.69	54	21	2.49	162	5.17	60	30.69	23.79	44	318	5.24437
319	2	2015-8-19 8:31:07	2	47	0	0	0	0	0	0	164	60	22.3081	124	83	68	96	0.708333	100	1.46	2.323	18	21	47.9	6.09	55	173	1.55	5.63	1.85	3.04	50	21	3.85	122	4.87	50.8	6.3	22.72	45	319	6.14955
320	2	2015-8-19 8:33:18	1	34	0	0	1	0	0	Occasional	170	68	23.5294	123	80	79	97	0.814433	68			14	22	51.8	4.6	69	359	1.04	4.07	1.06	2.42	70	10	2.88	165	5.78	54.7	134.25	15.99	46	320	3.26907
321	2	2015-8-19 8:34:49	1	50	1	0	1	0	20yrs, 20/day	Occasional	169	75	26.2596	131	94	91	97	0.938144	74	-0.183	1.538	44	35	48.3	4.94	80	380	2.21	5.58	1.65	2.84	63	25	2.07	157	6.71	46.5	282.99	18.14	47	321	3.98274
322	2	2015-8-19 8:36:51	2	66	0	0	0	0	0	0	154	53	22.3478	104	68	74	89	0.831461	92	-1.352	0.705	24	32	48.9	5.72	56	351	1.6	5.35	1.32	3.35	88	73	2.17	138	6.17	50.7	134.25	19.97	48	322	5.07682
323	2	2015-8-19 8:36:51	1	34	0	0	1	0	Occasional	Occasional	171	69	23.597	107	75	79	97	0.814433	72			28	20	48.7	4.69	80	474	2.18	5.06	1.51	2.72	118	28	5.62	165	7.96	59.7	191.64	17.52	49	323	3.65195
324	2	2015-8-19 8:36:59	2	37	1	0	0	0	0	0	160	69	26.9531	100	61	94	95	0.989474	60	3.021	3.433	15	20	47.1	4.65	60	321	0.5	4.36	1.15	2.63	79	10	5.41	130	5.43	56.7	88.49	15.97	50	324	3.30047
325	2	2015-8-19 8:42:28	1	42	1	0	0	0	0	often	171	75	25.6489	167	116	88	99	0.888889	84			17	19	46.8	5.69	76	498	2.69	4.29	0.94	2.42	73	26	5.22	149	6.48	58.5	277.61	30.36	51	325	7.67771
326	2	2015-8-19 8:42:36	2	47	0	0	0	0	0	0	163	49	18.4425	108	63	67	84	0.797619	60	-0.27	0.592	38	31	46.5	5.21	65	187	0.41	4.81	2.38	2.26	62	33	2.14	132	7.11	55.5	90.55	19.48	52	326	4.5107
327	2	2015-8-19 8:43:23	2	28	0	0	0	0	0	0	156	48	19.7239	93	57	62	89	0.696629	74			10	17	48.5	4.79	59	318	0.5	2.91	1.51	1.23	48	7	1.83	136	6.25	51.5	32.38	21.89	53	327	4.66014
328	2	2015-8-19 8:44:49	1	24	0	0	0	0	0	often	170	79	27.3356	121	69	85	101	0.841584	76			23	23	49.2	5.01	84	184	0.96	4.21	1.69	2.09	67	18	2.94	160	5.74	60.5	146.44	21.68	54	328	4.82741
329	2	2015-8-19 8:47:28	2	50	0	0	1	0	0	0	166	63	22.8625	108	65	74	93	0.795699	72	3.399	4.426	10	20	46.4	4.44	65	255	0.82	5.36	1.72	3.08	67	21	2.68	142	9.24	71	15.51	23.44	55	329	4.62549
330	2	2015-8-19 8:49:36	2	45	0	0	1	0	0	0	158	45	18.026	98	58	62	85	0.729412	60	0.226	0.987	17	16	48	4.88	55	262	1.09	5.6	2.13	3.05	45	11	2.39	130	5.79	69.3	82.05	17.71	56	330	3.8411
331	2	2015-8-19 8:51:29	2	28	0	0	0	0	0	0	157	50	20.2848	121	76	67	89	0.752809	76			15	22	49.6	5.13	68	331	0.86	3.8	1.47	1.99	52	12	1.74	136	7.56	71.4	61.01	19.71	57	331	4.49388
332	2	2015-8-19 8:54:42	1	34	0	0	0	0	0	0	169	79	27.6601	107	69	81	101	0.80198	68			23	23	47	4.86	100	421	2.46	5.57	1.29	3.05	73	11	1.9	164	5.3	63.6	182.69	21.06	58	332	4.54896
333	2	2015-8-19 8:55:29	1	60	0	0	0	0	0	0	165	73	26.8136	150	93	86	96	0.895833	70			18	19	49.1	5.25	77	338	2.41	5.34	1.11	3.2	61	21	3.96	146	4.71	63.1	135.21	26.58	59	333	6.202
334	2	2015-8-19 8:55:40	1	36	0	0	1	0	Occasional	Occasional	185	89	26.0044	124	87	90	102	0.882353	72			14	17	50.8	5.02	75	357	1.61	5.27	1.16	3.27	73	15	2.94	161	10.78	63.4	209.55	25.41	60	334	5.66925
335	2	2015-8-19 8:56:26	1	41	0	0	1	0	0	Occasional	178	73	23.04	121	76	84	99	0.848485	72			18	23	47.1	5.13	83	345	1.39	4.44	1.2	2.63	80	14	6.01	169	4.88	55.8	142.6	16.95	61	335	3.8646
336	2	2015-8-19 9:01:36	2	25	0	0	0	0	0	0	164	54	20.0773	113	68	68	92	0.73913	74			11	20	52.6	4.99	58	308	0.8	4.63	1.78	2.37	47	15	2.08	137	4.11	60.8	31.57	23.09	62	336	5.12085
337	2	2015-8-19 9:01:41	1	61	1	0	0	0	37yrs, 20/day	Occasional	155	43	17.898	127	83	74	83	0.891566	72	-2.617	-0.634	18	23	44.2	4.7	79	328	1.58	6.31	1.63	3.87	93	10	3.39	173	5.88	65.1	235.82	20.22	63	337	4.22373
338	2	2015-8-19 9:02:25	2	28									#DIV/0!					#DIV/0!				17	26	46.7	4.47	49	230	0.78	5.8	1.83	3.21	82	18	2	119	7.35	64.2	5.94	22.31	64	338	4.43225
339	2	2015-8-19 9:05:52	1	48									#DIV/0!					#DIV/0!		-0.225	1.437	19	19	46.3	5.09	89	366	2.34	5.26	1.45	2.76	91	24	3.77	155	6.1	50.3	144.38	17.72	65	339	4.00866
340	2	2015-8-19 9:06:44	1	33			1			Occasional	167	59	21.1553	102	66	73	89	0.820225	70	-0.067	0.971	24	26	49.7	5.02	91	399	1.51	5.72	1.37	3.58	75	15	5.19	166	5.98	46.6	150	29.69	66	340	6.62417
341	2	2015-8-19 9:09:37	1	36	0	0	0	0	15yrs, 7/day	0	171	68	23.255	106	60	77	91	0.846154	72	0.054	1.25	12	21	47.6	4.95	73	363	0.79	4.89	1.57	2.74	51	16	5.91	155	5.52	49.2	119.18	20.59	67	341	4.5298
342	2	2015-8-19 9:09:57	1	50	0	0	1	0	1yr,10/day	often	162	61	23.2434	98	67	78	92	0.847826	68	0.585	2.306	15	19	45.6	5.32	100	365	0.87	4.99	1.64	2.76	55	13	4.6	167	5.46	65.7	278.21	20.18	68	342	4.77145
343	2	2015-8-19 9:10:40	1	35	0	0	1	0	0	Occasional	173	54	18.0427	111	78	65	87	0.747126	68			31	33	49	4.91	88.9	418	1.21	4.56	1.53	2.56	100	31	5.25	162	4.95	59.6	287.76	12.92	69	343	2.81943
344	2	2015-8-19 9:11:40	1	39	0	0	1	0	0	0	174	52	17.1753	104	75	66	82	0.804878	56			6	17	53.8	4.31	75	364	0.74	4.09	1.18	2.45	91	8	3.68	147	4.27	64.6	57.82	17.98	70	344	3.44417
345	2	2015-8-19 9:17:33	1	28	0	0	0	0	0	Occasional	169	67	23.4586	129	79	87	95	0.915789	68	-0.32	0.399	53	31	48.5	4.69	75	401	1.87	5.87	1.27	3.69	95	71	4.57	170	6.64	53.9	280.6	20.69	71	345	4.31272
346	2	2015-8-19 9:18:03	1	36	1	0	1	0	21yrs, 20/day	Occasional	175	66	21.551	115	83	78	90	0.866667	78	-1.825	-0.628	18	23	50.4	4.6	74	402	1.23	6.13	1.08	4.15	66	21	8.22	145	6	54.4	76.02	19.54	72	346	3.99484
347	2	2015-8-19 9:19:15	2	51	1	0	1	0	0	0	166	61	22.1367	95	57	73	94	0.776596	74	-1.144	-0.06	25	28	46.9	5.08	72	157	1.04	4.3	1.47	2.32	68	9	3.93	125	3.35	60.3	102.19	22.45	73	347	5.06871
348	2	2015-8-19 9:24:44	1	34	0	1	1	0	0	Occasional	168	67	23.7387	116	76	80	95	0.842105	76			32	25	49.2	5.18	72	258	1.76	5.09	1.29	3.14	96	37	1.6	160	7.01	57.7	114.93	19.01	74	348	4.37652
349	2	2015-8-19 9:29:08	1	29	0	0	0	0	10yrs, 10/day	Occasional	172	54	18.2531	102	64	67	87	0.770115	66			8	14	50.6	5.32	64	310	0.88	5.02	1.67	2.71	88	13	4.17	145	5.11	53.2	66.11	18.34	75	349	4.33639
350	2	2015-8-19 9:30:44	1	26	0	0	0	0	4yrs, 5/day	Occasional	177	58	18.5132	103	79	70	90	0.777778	72			15	23	50.4	4.45	75	284	1.14	5.38	2.35	2.77	61	15	1.78	157	6.58	63.6	158.77	15.59	76	350	3.08336
351	2	2015-8-19 9:32:48	2	27	0	0	0	0	0	0	153	49	20.9321	111	64	66	83	0.795181	80	2.969	3.092	17	18	49.2	5.19	60	268	1.81	5.57	1.58	3.24	99	17	3.27	143	7.33	59.9	38.83	27.59	77	351	6.36409
352	2	2015-8-19 9:33:12	1	23	0	0	0	0	0	0	170	60	20.7612	128	80	73	94	0.776596	80			62	29	55.7	5.36	89	463	0.97	4.02	1.28	2.28	90	24	9.19	152	6.6	60.7	79.16	23.37	78	352	5.56725
353	2	2015-8-19 9:33:45	1	35	0	0	1	0	0	0	155	51	21.2279	116	82	75	85	0.882353	84	1.171	2.317	45	38	55	5.25	71	432	2.02	4.08	1.53	1.93	93	35	2.66	163	6.31	78.6	247.76	21.36	79	353	4.984
354	2	2015-8-19 9:36:14	1	27	0	0	0	0	Occasional	Occasional	173	70	23.3887	114	77	79	97	0.814433	78			32	29	52.4	5.41	81	360	1.26	4.55	1.27	2.64	72	22	4.38	163	6.94	61.6	170.15	17.31	80	354	4.16209
355	2	2015-8-19 9:37:05	1	30	0	0	0	0	0	0	167	59	21.1553	121	85	69	91	0.758242	76			14	19	51.5	5.35	62	281	0.61	3.8	1.95	1.64	58	17	5.82	152	4.83	59.4	124.52	15.98	81	355	3.79969
356	2	2015-8-19 9:39:06	2	33	0	0	1	0	0	0	152	48	20.7756	98	58	69	86	0.802326	66	2.975	3.252	24	15	43.1	4.8	70.3	346	1	4.5	1.32	2.56	47	36	3.09	133	6.96	49.6	39.55	21.49	82	356	4.58453
357	2	2015-8-19 9:41:31	2	28	0	0	1	1	0	0			#DIV/0!					#DIV/0!	74			17	17	50.4	5.7	57	267	0.57	4.25	1.88	2.06	46	10	2.16	127	5.23	60.2	16.7	13.43	83	357	3.40227
358	2	2015-8-19 9:42:42	2	51	0	0	1	0	0	0	158	59	23.634	141	84	84	95	0.884211	72	2.566	3.651	32	27	47.6	5.76	50	239	0.99	4.66	1.71	2.44	43	16	2.14	134	6.85	61	17.34	25.05	84	358	6.4128
359	2	2015-8-19 9:46:54	2	26	0	0	0	0	0	0	154	51	21.5045	116	63	65	91	0.714286	66			10	16	45.6	4.64	57	214	1.1	4.14	1.32	2.34	81	12	2.15	138	6.58	61.5	20.02	20.59	85	359	4.24612
360	2	2015-8-19 9:48:32	1	34	1	0	1	0	0	Occasional	165	62	22.7732	114	73	77	90	0.855556	66			67	37	49.4	5.04	63	300	1.32	3.86	1.38	1.96	81	20	3.99	155	4.57	44.1	237.61	20.12	86	360	4.50688
361	2	2015-8-19 9:53:58	1	43	0	0	1	0	21yrs,20/day	Occasional	164	79	29.3724	111	76	88	98	0.897959	76			22	26	47	4.76	75	342	3.96	5.6	0.95	2.76	90	15	2.87	154	10.21	71.2	200	21.78	87	361	4.60768
362	2	2015-8-19 10:01:07	2	34	0	0	0	0	0	0	157	55	22.3133	98	57	66	92	0.717391	74	0.23	0.538	21	20	49.2	5.18	47	225	1.13	3.69	1.13	2.1	60	12	1.69	131	5.64	72.2	93.39	18.97	88	362	4.36732
363	2	2015-8-19 10:05:47	2	26	0	0	0	0	0	0	166	58	21.048	95	63	66	89	0.741573	70			15	20	49.7	4.69	55	280	0.91	3.51	1.79	1.43	39	11	1.82	135	6.61	63.2	120.54	17.37	89	363	3.62068
364	2	2015-8-19 10:07:02	1	47	0	0	0	0	20yrs,15/day	0	166	66	23.9512	111	69	75	95	0.789474	78	-2.52	-0.889	47	28	48	5.11	81	285	1	3.92	1.37	2.07	119	12	3.26	163	6.11	47	356.44	23.15	90	364	5.25762
365	2	2015-8-19 10:07:35	2	19	0	0	0	0	0	0	161	57	21.9899	93	64	69	96	0.71875	60	3.475	3.531	12	17	44.9	4.12	60	295	1.24	4.44	1.34	2.35	67	6	2.9	131	5.18	63.9	9.76	18.92	33	365	3.46446
366	2	2015-8-19 10:10:04	1	51	1	0	1	0	0	Occasional	167	89	31.9122	134	90	100	105	0.952381	75	0.543	2.292	25	23	45.8	5.17	95	363	1.23	5.27	1.64	2.94	65	14	5.85	149	9.72	43.1	95.93	29.29	1	366	6.73019
367	2	2015-8-19 10:12:13	2	27	0	0	0	0	0	0	161	47	18.132	101	64	60	84	0.714286	68			9	18	49.1	5.06	50	326	1.4	3.65	1.01	1.95	45	8	6.42	126	5.98	73.4	33.58	11.81	2	367	2.65594
368	2	2015-8-19 10:16:54	2	32	0	0	1	0	0	0	168	62	21.9671	102	74	78	98	0.795918	72	-0.12	0.127	21	18	46.1	4.9	54	222	0.93	4.36	1.36	2.5	44	9	2.56	107	5.68	64	5.53	21.72	3	368	4.73013
369	2	2015-8-19 10:19:35	1	33	0	0	0	0	0	Occasional	171	62	21.2031	115	75	77	91	0.846154	80			50	47	49.5	4.86	83	381	1.3	4.32	1.61	2.15	84	23	2.85	153	6.4	64.7	310.22	10.08	4	369	2.17728
370	2	2015-8-19 10:24:08	1	42	0	0	0	0	21yrs,20/day	Occasional	176	82	26.4721	115	73	88	100	0.88	76	-0.379	1.078	47	27	47.5	4.99	78	436	2.44	4.86	0.8	2.89	95	18	3.67	168	6.8	55.6	150.05	33.59	5	370	7.44952
371	2	2015-8-19 10:26:45	1	28	0	0	0	0	Occasional	Occasional	168	70	24.8016	115	67	83	97	0.85567	60	2.554	3.274	18	15	51.2	4.52	81	502	1.78	4.08	0.86	2.54	85	16	2.56	172	4.22	59.5	119.82	24.28	6	371	4.87758
372	2	2015-8-19 10:34:39	2	48	1	0	1	0	0	0	156	55	22.6003	97	68	74	93	0.795699	66			12	23	47.6	4.82	61	293	1.04	4.5	1.6	2.37	71	11	14.21	133	4.23	69.5	49.87	15.34	7	372	3.28617
373	2	2015-8-19 10:37:02	1	54	0	0	1	0	0	Occasional	158	58	23.2335	122	83	85	95	0.894737	72	-0.304	1.523	31	23	42.7	5.11	79	382	3.72	4.51	0.87	2.11	66	31	4.15	145	4.77	56.8	335.11	9.42	8	373	2.13939
374	2	2015-8-19 10:40:06	1	38	0	0	1	0	0	Occasional	177	79	25.2163	100	71	79	102	0.77451	70			55	45	52.9	5.08	76	374	0.85	4.79	1.67	2.62	58	19	1.83	163	5.16	52.5	289.78	11	9	374	2.48356
375	2	2015-8-19 10:40:16	1	31	0	0	1	0	9yrs, 10/day	0	188	80	22.6347	134	74	85	96	0.885417	76			27	20	51.4	4.84	97	533	1.93	3.17	0.74	1.65	81	15	3.92	133	5.01	64.9	345.78	4.99	10	375	1.0734
376	2	2015-8-19 10:40:30	2	29	0	0	1	0	0	0			#DIV/0!					#DIV/0!	78			14	16	45.6	4.65	51	301	0.71	4.46	1.55	2.59	75	10	5.49	131	8.22	71.9	10.34	2.65	11	376	0.547667
377	2	2015-8-19 10:40:35	2	47	0	0	1	0	0	0	164	60	22.3081	107	67	73	92	0.793478	70			15	18	46.6	4.56	58	265	1.05	5.58	1.74	3.32	58	16	2.19	137	4.62	61.3	27.2	9.67	12	377	1.95979
378	2	2015-8-19 10:41:09	2	28	0	0	1	0	0	0	152	51	22.0741	105	71	70	91	0.769231	60			13	16	49.3	4.62	59	203	1.18	4.91	1.68	2.66	56	23	6.51	116	5.2	68.6	64.97	3.83	13	378	0.786427
379	2	2015-8-19 10:41:53	2	44	0	0	0	0	0	0	157	58	23.5304	115	72	73	95	0.768421	66	1.271	1.982	10	15	44	5.14	45	183	1.24	3.72	1.41	1.78	62	7	1.27	119	4.27	57.9	7.08	4.41	14	379	1.00744
380	2	2015-8-19 10:42:38	2	39	0	0	1	0	0	0	168	59	20.9042	125	84	77	96	0.802083	72	3.381	3.87	57	42	47.1	4.64	77	310	1.11	4.66	1.75	2.45	106	92	2.55	133	5.98	47.5	80.18	9.1	15	380	1.87662
381	2	2015-8-19 10:42:57	1	34	1	1	1	0	13yrs, 10/day	Occasional	180	79	24.3827	109	77	86	98	0.877551	72			21	21	51.1	4.81	73.5	410	2.96	5.07	1.06	2.99	57	26	3.36	166	9.11	45.5	313.78	24.02	16	381	5.13494
382	2	2015-8-19 10:46:02	1	27	0	0	1	0	0	0	161	46	17.7462	117	77	64	85	0.752941	64			28	25	51.8	4.04	87	474	0.66	3.69	1.55	1.86	63	13	1.56	170	5.3	54	113.67	7.16	17	382	1.28562
383	2	2015-8-19 10:48:28	2	26	0	0	1	0	0	0	158	53	21.2306	113	65	65	89	0.730337	72			17	24	53.3	4.2	53	268	0.66	4.51	1.89	2.38	54	13	3.75	134	5.4	54.6	32.36	22.75	18	383	4.24667
384	2	2015-8-20 8:06:49	1	42	0	0	0	0	7-8yrs, 20/day	often	166	79	28.6689	126	69	90	100	0.9	68			49	32	45.1	5.55	75.5	321	3.61	5.73	1.22	2.98	66	45	2.64	162	5.26	60.7	144.43	10.74	19	384	2.6492
385	2	2015-8-20 8:08:48	2	50	0	0	0	0	0	0	173	69	23.0546	111	71	86	104	0.826923	62	0.914	1.941	16	19	46.1	5.93	71	364	0.65	4.11	1.39	2.37	94	7	4.73	143	5.25	62.5	110.77	27.16	20	385	7.15817
386	2	2015-8-20 8:08:53	1	28	0	0	1	0	吸烟6年，20支/天	0	168	65	23.03	121	74	84	91	0.923077	72			35	23	51.3	5.43	77.4	497	3.19	4.06	1.05	2.01	85	22	3.75	176	7.84	57	74.18	12.31	21	386	2.97081
387	2	2015-8-20 8:11:07	2	53	0	0	1	0	0	0	149	52	23.4224	138	87	79	93	0.849462	84	1.473	2.676	26	34	45.6	5.35	74.7	250	2.18	4.48	1.28	2.2	72	9	2.43	107	5.34	68.7	115.29	4.59	22	387	1.0914
388	2	2015-8-20 8:12:02	1	43	0	0	0	0	0	Occasional	171	60	20.5191	137	89	82	92	0.891304	66	-1.128	0.366	10	15	43.8	4.88	91	329	1.17	4.53	1.45	2.55	58	12	3.46	160	4.98	41.6	158.37	7.91	23	388	1.71559
389	2	2015-8-20 8:12:57	2	27	0	0	1	1	0	0	169	56	19.6072	92	60	69	90	0.766667	70			15	18	45.7	5.01	64	265	0.59	3.67	1.58	1.78	43	19	2.57	137	8.08	57.4	69.87	8.43	24	389	1.87708
390	2	2015-8-20 8:13:59	2	35	0	1	1	0	0	0	164	62	23.0518	120	79	76	98	0.77551	78			20	20	46.1	5.24	61.6	217	1.73	4.49	2.42	1.57	55	11	2.5	131	4.25	56.9	2.58	13.9	25	390	3.23716
391	2	2015-8-20 8:14:31	2	42	1	1	1	0	0	0	152	49	21.2084	116	69	72	91	0.791209	72	0.622	1.239	34	26	51.7	5.31	51	232	0.88	5.16	2.06	2.56	102	27	12.29	141	5.42	62.8	72.16	3.18	26	391	0.75048
392	2	2015-8-20 8:17:59	1	51	0	0	1	0	11yrs	Occasional	174	85	28.075	139	93	93	105	0.885714	60			21	20	49	6.19	78	425	2.07	5.04	1.02	3.16	54	27	3.31	157	7.46	60.7	295.11	5.28	27	392	1.45259
393	2	2015-8-20 8:18:30	2	32	0	0	1	0	0	0	155	51	21.2279	106	59	78	91	0.857143	69	3.259	3.506	13	17	45	4.98	67	437	1.82	5.48	1.61	2.96	64	9	1.92	125	4.75	55.8	7.21	2.85	28	393	0.6308
394	2	2015-8-20 8:22:07	1	27	0	0	0	0	0	0	167	71	25.4581	117	73	85	95	0.894737	84			32	26	50.5	5.68	91	510	2.2	5.07	1.28	2.95	87	39	4.9	178	5.06	54.1	109.14	4.96	29	394	1.25212
395	2	2015-8-20 8:22:22	2	30	0	0	0	0	0	0	167	49	17.5697	106	61	66	89	0.741573	64			11	17	49.2	5.28	56.9	306	0.57	2.93	1.3	1.39	64	14	2.98	113	6.12	55.4	45.88	5.45	30	395	1.27893
396	2	2015-8-20 8:25:51	1	34	0	0	1	0	0	Occasional	163	69	25.9701	117	73	87	99	0.878788	60			13	16	50.8	5.17	68	365	1.52	4.65	1.32	2.7	74	12	2.22	163	5.19	53.3	219.56	15.45	31	396	3.55007
397	2	2015-8-20 8:28:58	1	50	0	0	1	0	30yrs, 5/day	0	165	69	25.3444	115	73	86	91	0.945055	66	1.316	3.037	16	17	49.8	5.36	86	357	1.01	5.29	1.58	3.21	61	16	1.38	155	5.24	52.1	264.89	25.4	32	397	6.05084
398	2	2015-8-20 8:29:44	2	29	0	0	0	0	0	0	164	52	19.3337	107	67	69	90	0.766667	72			12	15	50.2	5.17	62	193	0.9	4.7	1.76	2.49	43	4	2.74	132	3.94	49.2	37.86	13.14	33	398	3.01928
399	2	2015-8-20 8:30:07	1	52	1	0	0	0	0	Occasional	168	73	25.8645	98	57	88	98	0.897959	72			20	17	47.2	5.07	66	437	2.2	4.56	1.19	2.54	71	16	3.86	153	7.05	60	350.22	26.33	34	399	5.93303
400	2	2015-8-20 8:33:39	2	30	0	0	1	0	0	0			#DIV/0!					#DIV/0!	66	1.484	1.676	32	23	45.9	5.1	69	291	1.45	4.8	1.24	2.81	53	24	4.43	134	5.61	60.6	140.09	28.25	35	400	6.40333
401	2	2015-8-20 8:34:11	1	27	0	0	0	1	2yrs, 10/day	0	157	50	20.2848	115	64	68	88	0.772727	60			20	19	43.1	4.89	74.8	310	0.6	3.03	1.23	1.56	52	14	1.66	142	5.92	52.5	120.54	16.25	36	401	3.53167
402	2	2015-8-20 8:34:52	1	34	0	0	1	0	11yrs, 20/day	Occasional	165	68	24.977	139	90	83	93	0.892473	84			11	15	49.6	5.02	85	277	1.03	5.04	0.96	3.25	77	16	2.48	184	6.84	41.2	138.64	12.5	37	402	2.78889
403	2	2015-8-20 8:35:15	2	31	0	0	0	0	0	0	166	49	17.782	103	66	62	91	0.681319	84			11	18	48.3	4.64	55	251	0.49	4.06	1.91	1.88	66	14	1.11	141	8.1	61	170.67	11.82	38	403	2.43755
404	2	2015-8-20 8:36:09	1	29	0	0	1	0	0	0	178	76	23.9869	119	61	84	98	0.857143	72			22	21	51	5.25	48	411	2.22	5.62	1.15	3.52	93	19	2.44	153	4.78	51.1	43.53	9.91	39	404	2.31233
405	2	2015-8-20 8:36:14	1	30	0	1	1	0	0	Occasional	182	74	22.3403	120	84	75	93	0.806452	72	1.937	2.794	26	33	51.4	5.13	122	429	0.4	4.82	2.88	1.94	73	11	3.63	171	5.07	39.8	28.98	4.59	40	405	1.04652
406	2	2015-8-20 8:38:32	1	41	0	0	0	0	10yrs, 20/day	Occasional	171	75	25.6489	135	83	88	99	0.888889	84			191	120	43.4	5.91	94.3	437	0.9	2.88	0.7	1.7	196	64	5.32	154	4.57	52.7	227.56	13.44	41	406	3.53024
407	2	2015-8-20 8:39:30	2	25	0	0	1	0	0	0	160	44	17.1875	106	59	70	85	0.823529	65			19	27	49.2	4.92	51.4	226	1.75	4.77	1.76	2.35	72	24	2.12	135	3.84	52	102.26	12.13	42	407	2.65243
408	2	2015-8-20 8:40:00	2	26	0	0	0	0	0	0	150	37	16.4444	99	67	60	79	0.759494	75			11	17	45.9	4.99	62	317	0.54	3.74	1.59	1.93	76	13	8.27	140	6.4	50.4	11.44	6.01	43	408	1.33288
409	2	2015-8-20 8:41:49	1	37	1	0	1	1	0	Occasional	173	55	18.3768	123	85	70	89	0.786517	74			12	20	47.8	4.93	95	380	0.81	4.18	1.4	2.39	53	11	14.26	158	4.92	57.7	154.75	7.8	44	409	1.70907
410	2	2015-8-20 8:41:54	1	27	0	0	1	0	6yrs, 10/day	Occasional	171	74	25.3069	129	78	83	94	0.882979	84			20	17	49.2	4.6	65	442	1.53	4.97	1.25	3	70	34	1.57	164	7.91	39.3	110.41	12.65	45	410	2.58622
411	2	2015-8-20 8:42:26	2	32	0	0	0	1	0	0			#DIV/0!	98	66			#DIV/0!	72			16	16	45.2	4.83	51.2	245	0.73	4.49	1.52	2.63	40	17	4.12	132	8.06	56.8	39.43	10.62	46	411	2.27976
412	2	2015-8-20 8:43:47	1	46	0	0	1	0	0	Occasional	159	61	24.1288	151	92	81	89	0.910112	72	0.013	1.612	26	17	49.3	5.29	76	360	1.29	5.42	1.39	3.35	118	22	1.55	165	5.55	60.4	376.89	10.34	47	412	2.43105
413	2	2015-8-20 8:45:19	2	33							159	57	22.5466	99	58	73	95	0.768421	66	2.628	2.905	27	30	40.2	5.64	62	215	0.37	3.45	1.61	1.72	74	7	1.92	130	5.05	60.2	38.86	12.4	48	413	3.10827
414	2	2015-8-20 8:45:24	1	56	0	0	0	0	20yrs, 20/day	Occasional			#DIV/0!	123	69			#DIV/0!	72	-1.143	0.733	25	23	47.5	5.03	78	416	1.93	7.01	1.06	4.83	77	35	3.43	170	7.62	58.2	73.99	13.79	49	414	3.08283
415	2	2015-8-20 8:46:32	1	59	0	0	0	0	9yrs, 10/day	Occasional	168	62	21.9671	109	67	80	94	0.851064	72			23	24	48	7.82	62	275	0.91	4.42	2.28	1.87	73	23	2.36	154	3.69	52.6	171.56	9.13	50	415	3.17318
416	2	2015-8-20 8:46:44	1	50	0	0	0	0	0	Occasional	163	56	21.0772	105	74	77	86	0.895349	72			25	28	48.6	7.07	76	380	1.06	6.61	1.76	4.23	68	19	1.86	162	5.57	43.1	116.2	21.49	51	416	6.75264
417	2	2015-8-20 8:47:03	1	57	1	0	1	0	0	0	168	65	23.03	118	76	81	93	0.870968	72	-1.197	0.702	19	21	44.6	5.87	92.1	421	1.27	5.06	1.31	3.05	62	13	1.73	137	6.32	64	326.22	11.19	52	417	2.91935
418	2	2015-8-20 8:47:10	1	34	0	0	1	0	0	Occasional	168	65	23.03	129	89	78	94	0.829787	96			42	31	48.3	5.03	91	487	1.52	5.13	1.18	3.27	59	19	4.55	166	5.68	47.2	233.78	11.57	53	418	2.58654
419	2	2015-8-20 8:47:19	2	37	0	0	1	0	0	0	157	58	23.5304	118	72	76	93	0.817204	84			23	18	42.1	4.88	62.8	316	0.93	3.49	1.27	1.83	58	10	3.09	95	5.76	61.5	5.84	11.1	54	419	2.40747
420	2	2015-8-20 8:48:50	1	58	1	0	0	0	0	Occasional	167	68	24.3824	121	76	85	96	0.885417	60	-0.099	1.822	36	31	50.1	5.71	83	437	1.02	3.24	1.5	1.4	55	24	3.14	145	5.8	53	282.67	4.42	55	420	1.1217
421	2	2015-8-20 8:49:51	1	35	1	0	0	0	0	Occasional	172	57	19.2672	110	73	71	89	0.797753	60			12	20	53	5.31	85	328	1.41	5.07	1.91	2.76	70	13	1.66	160	5.17	46.6	75.75	4.43	56	421	1.04548
422	2	2015-8-20 8:50:54	2	35	0	0	0	0	0	0	157	54	21.9076	99	69	74	91	0.813187	69			10	17	45.3	4.9	76	263	2.82	3.23	0.72	1.45	79	11	1.97	108	5.85	64.8	4.02	2.8	57	422	0.609778
423	2	2015-8-20 8:52:26	1	28	0	0	0	0	0	often	166	64	23.2254	133	84	76	92	0.826087	72			23	23	47.9	5.42	84	407	1.34	4.06	1.51	2.08	54	25	3.64	162	7.65	47.5	76.73	16.26	58	423	3.91685
424	2	2015-8-20 8:52:27	2	28	0	0	0	0	0	0	160	59	23.0469	97	73	78	95	0.821053	84			29	23	50.9	5.6	46	268	1	4.26	1.28	2.46	89	11	2.82	154	5.46	55.3	24.83	4.39	59	424	1.09262
425	2	2015-8-20 8:52:28	2	66	0	0	0	0	0	40yrs, 100g/day	147	49	22.6757	142	85	81	90	0.9	70	-2.236	-0.178	17	23	42.8	5.47	53.1	222	0.83	6.33	2.06	3.85	97	85	5.7	133	4.79	63.3	160.89	7.91	60	425	1.92301
426	2	2015-8-20 8:53:40	2	46	0	0	1	0	0	0	153	54	23.0681	125	83	74	94	0.787234	68	1.848	2.658	19	24	48.7	5.64	60	325	1.79	5.27	1.7	2.98	64	18	5.15	141	5.55	54.9	23.23	10.79	61	426	2.70469
427	2	2015-8-20 8:55:20	2	44	0	0	0	0	0	0	156	50	20.5457	109	68	66	91	0.725275	65	-0.507	0.204	17	29	47.1	5.73	71	288	1.15	5.16	1.85	2.85	63	16	1.81	147	5.5	46.5	39.41	19.91	62	427	5.07041
428	2	2015-8-20 8:55:24	1	29	0	0	0	0	7yrs, 16/day	Occasional	176	73	23.5666	122	64	83	99	0.838384	60	-0.802	-0.011	15	16	47.6	5.22	81	345	0.77	4.59	1.54	2.64	52	15	3.22	169	6.67	62.6	156.02	13.16	63	428	3.05312
429	2	2015-8-20 8:56:25	2	29	0	0	0	0	7yrs, 16/day	Occasional	176	73	23.5666	122	64	83	99	0.838384	90			11	16	50.3	4.38	67	227	1.04	6.33	1.85	3.67	70	7	2.16	133	6.75	70.7	27.64	26.87	64	429	5.23069
430	2	2015-8-20 8:58:53	1	58	0	0	0	0	30yrs, 20/day	33yrs, 50-100g/day	165	70	25.7117	109	67	93	98	0.94898	66			23	26	44.8	5.17	71	379	1.71	5.61	1.71	3.38	66	24	5.15	141	4.96	64.2	221.33	12.47	65	430	2.86533
431	2	2015-8-20 8:58:58	1	42	0	0	0	0	0	0	158	67	26.8386	116	80	87	96	0.90625	72			21	23	44.6	5.55	82	336	1.72	5.44	1.57	3.09	92	17	6.16	159	5.92	68	195.56	23.43	66	431	5.7794
432	2	2015-8-20 8:58:59	1	33	1	0	1	1	0	0			#DIV/0!					#DIV/0!	72			51	46	47.7	5.22	65.9	513	0.97	4.53	1.36	2.92	65	22	2.9	163	6.03	48.7	78.17	8.86	67	432	2.05552
433	2	2015-8-20 8:59:01	2	31	0	0	1	0	0	0	160	54	21.0938	125	83	64	89	0.719101	82			11	16	50.2	5.61	69.9	241	0.68	3.84	1.64	1.87	35	10	2.99	139	6.75	43.3	38.81	11	68	433	2.74267
434	2	2015-8-20 8:59:17	2	60	0	1	0	0	0	0	150	49	21.7778	115	67	70	89	0.786517	72	-1.978	-0.329	32	44	44.4	5.38	62.3	238	1.53	6.18	2.12	3.35	69	29	6.09	130	5.03	57.6	121.81	8.07	69	434	1.92963
435	2	2015-8-20 9:00:43	1	29	1	0	0	1	0	0	166	72	26.1286	122	72	91	101	0.90099	78	1.846	2.636	36	24	44.9	4.69	84	472	0.85	3.59	1.61	1.59	82	31	3.36	154	5.28	61.2	339.56	12.02	70	435	2.5055
436	2	2015-8-20 9:01:21	2	27	0	1	1	0	0	Occasional	157	56	22.719	114	60	70	101	0.693069	60	0.225	0.348	40	79	46.9	5	73	199	0.76	4.39	1.1	2.78	48	11	2.06	140	7.51	58.3	35.67	7.26	71	436	1.61333
437	2	2015-8-20 9:01:54	2	64	1	0	1	0	0	0	155	72	29.9688	132	73	83	107	0.775701	68	-1.149	0.771	11	20	45.3	5.23	107	394	1.46	4.47	2.09	1.88	74	15	2.74	127	5.09	64.8	54.44	2.88	72	437	0.66944
438	2	2015-8-20 9:02:17	2	31	0	0	1	0	0	0	166	44	15.9675	95	67	58	84	0.690476	66			7	12	44.5	4.45	64	187	0.93	4.04	1.83	1.9	77	7	2.34	136	7.11	59.6	50.72	3.88	73	438	0.767378
439	2	2015-8-20 9:03:45	2	40	0	1	1	1	0	0	167	61	21.8724	105	68	78	97	0.804124	64			23	25	45.7	5	37	301	0.81	5.33	1.4	3.09	78	57	4.68	133	4.69	66.7	14.03	4.99	74	439	1.10889
440	2	2015-8-20 9:04:23	2	35	0	0	1	0	0	0	158	50	20.0288	93	58	63	88	0.715909	64			10	16	45.1	4.69	61	191	0.7	4.39	1.79	2.33	40	16	3.27	125	5.64	63.2	26.58	11.07	75	440	2.30748
441	2	2015-8-20 9:04:27	2	33	0	0	0	0	0	0	168	60	21.2585	94	65	75	98	0.765306	66	-0.276	0.001	8	18	44.3	4.97	66	306	0.76	3.76	1.3	2.11	56	6	4.7	108	6.05	64.6	10.02	15.32	76	441	3.38402
442	2	2015-8-20 9:04:49	2	26	0	0	0	0	0	0	158	65	26.0375	86	53	77	102	0.754902	84			14	20	47.9	4.98	75	425	1.56	5.4	1.39	3.25	57	20	5.03	150	10.66	61.5	62.09	25.26	77	442	5.59088
443	2	2015-8-20 9:08:08	1	37	0	0	1	0	14yrs, 10/day	0	165	64	23.5078	109	70	80	92	0.869565	72			21	22	49.1	5.29	90	350	1.35	4.31	0.94	2.66	80	14	3.63	163	7.54	44.3	253.33	16.23	78	443	3.81585
444	2	2015-8-20 9:08:30	2	43	0	0	1	0	0	0			#DIV/0!					#DIV/0!	70	2.039	2.702	11	15	47.6	4.88	49	263	0.67	4.6	1.96	2.35	102	13	4.22	139	5.48	63.5	20.88	8.07	79	444	1.75029
445	2	2015-8-20 9:08:32	1	50	1	0	0	0	0	Occasional	165	69	25.3444	133	88	79	90	0.877778	72	1.436	3.157	17	21	49.3	4.76	79	316	0.91	5.14	2.19	2.71	51	12	1.6	163	5.69	44.9	288.89	27.16	80	445	5.74585
446	2	2015-8-20 9:12:04	2	31	0	0	1	0	0	0	178	63	19.8839	118	81	71	99	0.717172	60	-0.173	0.047	20	27	49.3	4.76	80	314	1.15	4.59	2.23	1.98	55	19	2.78	143	5.03	51.2	63.66	23.91	81	446	5.05829
447	2	2015-8-20 9:13:07	1	33	0	0	0	0	0	Occasional	179	60	18.726	119	80	72	90	0.8	84			11	18	46.2	4.84	78.5	297	1	3.73	2.29	1.23	47	14	2.62	153	5.14	59.1	295.11	8.68	82	447	1.86716
448	2	2015-8-20 9:13:37	1	28	0	0	1	1	3yrs, 20/day	Occasional	173	74	24.7252	116	71	84	97	0.865979	66			45	24	50.2	5.19	62	414	2.04	2.71	0.87	1.16	68	16	2.77	163	4.97	51.9	175.11	4.08	83	448	0.94112
449	2	2015-8-20 9:13:53	1	35	0	0	1	0	0	Occasional	164	63	23.4236	105	75	77	91	0.846154	72			8	17	48.3	4.21	90	410	1.65	5.81	1.3	3.71	66	13	1.75	163	4.6	49.2	120	3.58	84	449	0.669858
450	2	2015-8-20 9:22:26	1	36	0	0	0	0	14yrs, 10/day	Occasional	180	81	25	118	67	85	101	0.841584	72			13	19	46.5	5.14	108	457	1.03	4.98	1.85	2.74	70	21	1.87	152	4.6	47	123.98	5.38	85	450	1.22903
451	2	2015-8-20 9:23:00	2	24	0	0	1	0	0	0	158	56	22.4323	102	62	79	91	0.868132	72			14	23	46.9	4.57	64	340	0.77	3.67	1.46	1.92	63	8	1.03	126	4.96	65	126.91	10.16	86	451	2.06361
452	2	2015-8-20 9:23:01	2	25	0	0	0	0	0	0	159	49	19.3821	113	67	67	88	0.761364	78			14	18	43.3	5.05	67	206	0.88	4.49	2.26	1.99	56	10	2.59	140	7.64	68.6	24.6	10.08	87	452	2.2624
453	2	2015-8-20 9:24:41	2	25	0	0	1	0	0	0	159	62	24.5243	107	73	75	96	0.78125	84			13	18	47.2	5.4	50	302	0.66	4.61	1.76	2.42	69	11	1.26	130	7.2	60.1	62.84	3.19	88	453	0.7656
454	2	2015-8-20 9:25:28	1	33	0	0	0	0	15yrs, 10/day	often	172	74	25.0135	139	90	88	95	0.926316	72			49	37	50.3	5.88	65	425	2.31	4.51	1.28	2.43	99	162	4.4	171	7.78	55.8	394.98	8.97	89	454	2.34416
455	2	2015-8-20 9:25:45	2	33	0	0	0	0	0	0	158	58	23.2335	110	65	79	100	0.79	78			13	20	45.1	5.23	70.9	267	0.7	4.6	1.89	2.4	63	9	2.94	139	7.26	51.6	27.36	6.89	90	455	1.60154
456	2	2015-8-20 9:27:22	1	36	0	0	1	0	0	Occasional	157	58	23.5304	107	66	78	92	0.847826	66			15	18	47.3	4.99	79	401	1.48	4.43	1.1	2.64	65	16	3.66	145	5.61	56.4	159.13	10.9	1	456	2.41738
457	2	2015-8-20 9:27:51	1	40	0	0	1	0	10yrs, 10/day	often	172	77	26.0276	112	80	90	97	0.927835	72	0.628	2.005	25	21	45.1	5.18	100	453	1.14	4.55	1.3	2.68	87	42	4.93	176	5.47	64.7	163.35	13.03	2	457	2.9998
458	2	2015-8-20 9:28:29	1	43	1	0	0	0	27yrs, 20/day	0	165	62	22.7732	117	80	78	93	0.83871	72			24	19	49.1	4.78	75	440	0.61	3.81	1.14	2.25	83	18	7.13	171	11.61	54.2	42.96	7.08	3	458	1.50411
459	2	2015-8-20 9:33:30	2	39	0	1	0	0	0	0	164	55	20.4491	86	62	79	94	0.840426	72	-1.463	-0.973	46	38	48.5	5.79	52	354	0.97	6.33	1.98	3.68	110	92	4.07	143	8.3	72.9	93.71	8.76	4	459	2.25424
460	2	2015-8-20 9:33:44	2	42	0	0	0	0	0	0	164	57	21.1927	100	60	72	95	0.757895	72	0.112	0.729	11	18	44	5.32	63	249	3.62	4.98	0.89	2.61	66	6	7.08	139	6.92	44.3	10.49	9.27	5	460	2.19184
461	2	2015-8-20 9:34:08	1	36	0	0	1	0	8yrs, 10/day	Occasional	174	75	24.7721	114	74	86	100	0.86	75	-1.003	0.194	25	21	44.9	5.44	82	320	1.43	3.23	1.17	1.53	79	14	43.62	168	6.46	57.6	184.77	8.25	6	461	1.99467
462	2	2015-8-20 9:35:38	2	38							174	75	24.7721	114	74	86	100	0.86	69			12	21	48.8	4.85	48	234	0.72	3.79	1.75	1.86	70	10	8.14	136	4.18	59.6	7.18	9.98	7	462	2.15124
463	2	2015-8-20 9:35:58	1	45	0	0	1	0	30yrs, 20/day	Occasional	167	66	23.6652	117	71	82	94	0.87234	72	-0.773	0.793	41	19	44.6	4.33	59	284	1.26	4.23	1.79	1.92	66	47	2.68	146	5.33	45.6	217.57	7.8	8	463	1.50107
464	2	2015-8-20 9:46:00	2	43									#DIV/0!	110	77			#DIV/0!		-0.181	0.483	15	16	42.1	4.9	57	285	1.64	4.73	1.58	2.45	69	17	1.85	135	6.73	65.2	11.67	9.63	9	464	2.0972
465	2	2015-8-20 9:46:45	1	42	1	0	1	0	0	0	168	62	21.9671	111	56	76	90	0.844444	72			12	19	48.3	4.85	67	405	0.65	3.91	1.35	2.19	64	12	6.78	158	5.44	57.5	147.7	8.79	10	465	1.89473
466	2	2015-8-20 9:46:48	2	32	1	0	1	0	0	0	166	52	18.8707	146	82	66	89	0.741573	84			16	20	42.4	5.01	72.6	336	0.76	5.3	2.19	2.74	74	13	1.57	138	7.9	45.7	8.58	10.28	11	466	2.28901
467	2	2015-8-20 9:47:44	1	26	0	0	0	0	4yrs, 20/day	Occasional	172	58	19.6052	112	68	74	90	0.822222	72	2.188	2.756	17	18	48.6	4.82	93	424	0.64	3.95	1.37	2.2	67	11	1.88	151	4.42	55	156.41	7.5	12	467	1.60667
468	2	2015-8-20 9:47:53	1	39	0	0	0	0	21yrs, 10/day	Occasional	163	57	21.4536	103	74	77	86	0.895349	72			11	19	45.6	4.68	91.4	385	1.27	3.67	1.16	1.81	99	13	3	148	3.54	51.1	12.15	10.34	13	468	2.15072
469	2	2015-8-20 9:48:40	1	36							163	57	21.4536	103	74	77	86	0.895349				34	27	49.4	5.39	58	269	1.76	4.47	1.22	2.53	65	19	6.19	150	5	51.4	133.01	8.47	14	469	2.02904
470	2	2015-8-20 9:49:45	2	26	0	0	1	0	0	0	168	53	18.7783	121	70	65	92	0.706522	72			24	26	45.7	4.73	76.6	313	0.61	3.6	1.77	1.54	55	11	0.81	123	5.68	59.3	9.36	8.18	15	470	1.71962
471	2	2015-8-20 9:50:14	2	25	0	0	1	0	0	0	158	49	19.6283	98	69	69	87	0.793103	84			15	22	49.6	4.79	54	333	0.49	4.56	2.02	2.27	71	18	4.41	137	6.23	60.2	39.42	8.15	16	471	1.73504
472	2	2015-8-20 9:50:16	1	34	0	0	1	0	11yrs, 20/day	Occasional	172	59	19.9432	136	86	74	90	0.822222	60			26	21	49	5.32	73.1	271	1.31	5.72	1.68	3.36	29	13	3.6	163	6.93	46.3	88.82	10.11	17	472	2.39045
473	2	2015-8-20 9:52:52	1	28	1	0	1	0	9yrs,20/day	often	163	72	27.0993	129	74	84	96	0.875	78	1.5	2.22	85	36	47.1	5.07	89	342	2.02	4.48	1.41	2.24	58	49	1.84	151	6.93	58.2	239	11.39	18	473	2.56655
474	2	2015-8-20 9:53:04	2	29	0	0	1	0	0	0	162	51	19.433	94	61	71	92	0.771739	69			13	20	45.6	4.65	60	233	0.7	4.74	2.18	2.21	58	15	1.25	138	6.69	54.8	62.41	9.3	19	474	1.922
475	2	2015-8-20 9:54:03	1	22	0	0	1	0	Occasional	Occasional	170	60	20.7612	121	77	73	92	0.793478	66			54	25	47.6	5.07	75.3	301	0.79	3.35	1.21	1.69	75	38	1.68	160	6.66	65.5	159.24	10.06	20	475	2.26685
476	2	2015-8-20 10:02:33	1	32	0	0	0	0	Occasional	Occasional	169	78	27.31	131	79	90	103	0.873786	86			48	31	53.6	5.44	73	472	1.79	4.47	1.2	2.61	91	60	3.13	160	8.1	76.6	91.56	11.81	21	476	2.8554
477	2	2015-8-20 10:03:06	1	48	0	0	0	0	30yrs, 40/day	often			#DIV/0!	105	67			#DIV/0!	72	-0.114	1.548	42	39	46	5.61	76.6	314	1.38	5.13	1.85	2.78	99	86	3.54	155	6.68	46	206.19	14.1		477	3.5156
478	2	2015-8-20 10:03:15	2	26	0	0	1	0	0	0	146	50	23.4566	105	68	72	89	0.808989	84			11	15	48.2	5.2	55.1	350	0.53	4.86	1.86	2.6	98	11	5.92	138	5.17	54.3	51.44	7.42	22	478	1.71484
479	2	2015-8-20 10:04:44	2	44	0	0	1	0	0	0	157	50	20.2848	102	62	74	88	0.840909	84	0.908	1.619	11	16	43.2	5.08	60.3	226	0.6	3.92	1.86	1.76	53	13	2.31	128	5.14	71.1	35.3	8.61	23	479	1.94395
480	2	2015-8-20 10:05:36	2	77	0	0	1	0	0	0	150	50	22.2222	124	75	89	91	0.978022	78			24	28	44.9	5.22	114	368	1.45	4.5	1.91	2.01	80	21	2.76	128	5.86	65.6	113.63	8.2	24	480	1.9024
481	2	2015-8-20 10:06:01	2	29	0	0	1	0	0	0	157	53	21.5019	109	63	70	94	0.744681	72			17	19	47.6	5.36	65	283	1.24	4.22	1.63	2.13	49	12	2.04	129	7.66	55.1	35.88	10.93	25	481	2.60377
482	2	2015-8-20 10:08:03	1	20	0	0	0	0	0	0	171	60	20.5191	122	65	68	91	0.747253	76	3.443	3.436	22	25	48.4	5.16	84	321	1.47	5.36	1.94	2.74	51	11	1.5	159	6.43	48.9	114.07	11.27	26	482	2.58459
483	2	2015-8-20 10:08:13	1	34	0	0	0	1	10yrs, 10/day	0	168	60	21.2585	114	83	76	90	0.844444	72			16	20	50.4	5.32	72	308	2.15	4.97	1.27	3.01	51	14	3.58	175	6.55	59.8	64.09	13	27	483	3.07378
484	2	2015-8-20 10:08:22	2	25	0	0	1	0	0	0	160	53	20.7031	109	55	65	89	0.730337	72			15	19	49.5	5.15	68	312	0.51	4.26	1.91	2.1	66	11	1.76	143	7.5	51.6	76.61	10.68	28	484	2.44453
485	2	2015-8-20 10:08:33	2	52	0	1	1	0	0	0	156	53	21.7784	112	66	76	94	0.808511	68	-1.331	-0.188	40	38	45	4.92	59	238	0.98	5.33	1.78	2.98	63	26	5.22	132	4.71	52.3	122.12	6.4	29	485	1.39947
486	2	2015-8-20 10:09:24	1	34	0	0	0	0	0	Occasional	173	50	16.7062	119	65	65	86	0.755814	60	1.835	2.929	22	23	48.5	4.78	89	422	0.87	3.3	1.06	1.87	59	22	2.75	155	3.63	54.5	203.51	11.77	30	486	2.50047
487	2	2015-8-20 10:11:43	1	50	1	0	1	0	0	Occasional	167	68	24.3824	133	86	85	93	0.913978	72			39	28	45.6	5.02	90	383	1.68	5.9	1.49	3.56	72	53	3.44	157	7.88	67.5	88.82	10.62	31	487	2.36944
488	2	2015-8-20 10:11:56	1	29	0	0	1	0	0	Occasional	169	66	23.1084	111	67	83	95	0.873684	72			17	22	46.4	4.92	71.8	423	0.66	3.27	1.31	1.7	58	10	1.61	133	6.18	61.4	63.85	9.76	32	488	2.13419
489	2	2015-8-20 10:12:16	1	47	0	0	1	0	Occasional	Occasional	172	74	25.0135	116	80	85	100	0.85	78	0.829	2.46	12	19	45.2	5.7	90	337	0.77	4.95	1.53	2.98	56	18	4.57	140	7	64.8	91.97	10.42	33	489	2.63973
490	2	2015-8-20 10:12:36	2	30	0	0	1	0	0	0	170	56	19.3772	91	62	69	94	0.734043	78			16	22	44.3	4.92	45	223	1.39	4.68	1.37	2.72	55	15	2.32	109	4.47	44.7	4.85	10.24	34	490	2.23915
491	2	2015-8-20 10:14:20	2	26	0	0	1	0	0	0	162	49	18.6709	109	68	65	86	0.755814	67			15	19	48.8	5.36	58	272	1.31	4.11	1.54	2.06	74	8	3.84	145	4.91	51.7	55.21	12.88	35	491	3.0683
492	2	2015-8-20 10:14:27	2	49	0	0	1	0	0	0	161	59	22.7615	114	60	79	93	0.849462	66	-0.321	0.65	22	22	52.2	4.69	55	320	0.56	4.34	1.38	2.53	89	24	2.34	129	5.52	62.8	144.98	8.9	36	492	1.85516
493	2	2015-8-20 10:16:45	1	30	0	0	0	0	0	often	164	51	18.9619	112	70	70	86	0.813953	66	2.347	3.204	11	16	48.6	4.95	103	436	0.96	4.36	1.9	2.05	44	17	2.51	163	4.61	58.1	155.97	12.45	37	493	2.739
494	2	2015-8-20 10:17:18	2	28	0	0	1	0	0	0			#DIV/0!	102	71			#DIV/0!	70			15	20	44.8	5.21	45	309	0.67	4.46	1.35	2.68	63	15	1.14	133	6.8	50.9	11.36	18.75	38	494	4.34167
495	2	2015-8-20 10:17:58	1	43	0	0	1	0	21yrs, 20/day	often	166	68	24.677	112	65	79	93	0.849462	60	-0.387	1.108	22	26	47.3	5.53	80	257	1.12	4.47	2.69	1.6	51	34	2.36	154	6.06	67.1	284.52	9.24	39	495	2.27099
496	2	2015-8-20 10:18:26	1	46	0	0	1	0	20yrs, 10/day	Occasional	163	57	21.4536	107	66	73	85	0.858824	72	0.459	2.058	13	22	45.4	4.69	100	362	0.79	4.37	1.96	2.07	47	17	6.83	170	5.6	59.6	103.29	6.91	40	496	1.44035
497	2	2015-8-20 10:20:05	2	33	0	0	1	0	0	0	161	69	26.6193	108	75	79	102	0.77451	65	0.973	1.25	17	19	44	5.08	62	285	1.02	4.29	1.42	2.37	59	8	3.27	141	6.09	62.3	18.17	9.4	41	497	2.12231
498	2	2015-8-20 10:20:10	1	51	1	1	0	1	20yrs, 20/day	Occasional	171	68	23.255	115	79	90	98	0.918367	68	-0.623	1.126	17	22	44.7	4.92	85	304	1.3	5.17	1.19	3.23	125	16	3.44	147	6.14	59.6	141.28	9.13	42	498	1.99643
499	2	2015-8-20 10:20:47	2	51	0	0	1	1	0	0	159	52	20.5688	90	49	71	89	0.797753	66	-0.515	0.569	31	21	39.6	5.15	60	225	0.92	4.43	1.2	2.78	113	33	4.56	130	4.44	65.1	274.48	8.79	43	499	2.01193
500	2	2015-8-20 10:21:04	1	57	0	0	1	1	0	0	162	58	22.1003	100	60	77	93	0.827957	66	-0.902	0.997	21	24	42.2	4.61	75	352	1	3.2	1	1.81	88	16	1.8	121	5.74	54.9	222.93	8.57	44	500	1.7559
501	2	2015-8-20 10:21:14	2	36	0	0	0	0	0	0	167	67	24.0238	119	75	84	99	0.848485	66			8	22	48.1	5.23	65	299	1.78	3.6	1.58	1.54	54	11	5.97	131	4.34	66	4.63	12.43	45	501	2.88928
502	2	2015-8-20 10:21:38	1	31	0	1	1	0	0	Occasional	179	80	24.968	111	78	87	102	0.852941	84	1.979	2.899	15	20	47.9	4.94	82	351	1.22	4.17	1.36	2.23	68	21	2.97	165	5.81	49.9	97.52	6.04	46	502	1.32612
503	2	2015-8-20 10:22:33	2	33	0	0	0	0	0	0	158	52	20.83	108	68	72	91	0.791209	72			10	16	47.2	4.24	50	271	0.88	4.78	1.45	2.85	64	10	2.07	128	5.55	57.8	7.04	6.68	47	503	1.25881
504	2	2015-8-20 10:23:31	1	79	1	0	0	0	0	0	164	65	24.1672	158	71	92	96	0.958333	66	-2.823	-0.556	38	24	41.9	4.21	102	249	1.25	5.13	2.13	2.36	86	92	2.55	153	10.73	80	45.21	12.64	48	504	2.36508
505	2	2015-8-20 10:24:05	1	33	0	0	1	1	0	Occasional	180	83	25.6173	124	78	88	102	0.862745	72	0.887	1.926	53	29	50.8	5.23	84	399	2.26	4.82	1.12	2.81	107	49	10.29	170	6.71	49.2	62.84	13.77	49	505	3.20076
506	2	2015-8-20 10:46:07	2	34	0	0	0	0	0	0	151	51	22.3674	101	53	70	92	0.76087	78			7	19	46.2	4.71	53	214	0.63	4.41	1.92	2.15	54	6	2.48	134	5.89	53.5	17.95	9.39	50	506	1.96564
507	2	2015-8-20 10:46:38	2	35	0	0	1	0	0	0	159	60	23.7332	90	58	73	98	0.744898	72			18	22	45.2	4.43	58	223	1.17	4.55	1.47	2.56	61	18	7.32	120	5.34	57.1	27.18	8.43	51	507	1.65977
508	2	2015-8-20 10:47:22	1	15	0	0	0	0	0	Occasional	179	89	27.7769	123	87	93	107	0.869159	90			25	28	49.3	5.55	103.7	540	1.23	3.84	1.11	2.1	128	18		171	10.37	74.5	87.62	21.99	52	508	5.4242
509	2	2015-8-20 10:47:29	1	29	0	0	1	0	0	Occasional	169	67	23.4586	123	67	77	93	0.827957	60			41	32	47.4	5.56	83	359	0.88	4.97	1.81	2.81	56	59	4.03	155	5.09	45.6	88.16	8.08	53	509	1.99666
510	2	2015-8-20 10:48:34	1	29	0	0	0	0	0	Occasional	160	56	21.875	129	85	72	90	0.8	80			13	20	47.6	5.39	87.8	396	1.13	5.08	1.73	2.76	71	13	2.14	173	6.17	63.7	109.17	7.18	54	510	1.72001
511	2	2015-8-20 10:48:53	1	47	0	0	1	0	0	Occasional	168	81	28.699	130	82	96	102	0.941176	60	1.188	2.819	21	31	46	4.58	93	399	1.62	5.76	1.8	3.22	53	42	3.43	159	8.18	55	150.42	5.83	55	511	1.18673
512	2	2015-8-20 13:31:01	2	26	0	0	0	0	0	0	164	52	19.3337	93	54	66	93	0.709677	66			27	28	45	5.19	54	227	0.69	2.7	1.25	1.23	69	9	1.22	110	3.88	53.3	33.15	9.79	56	512	2.25823
513	2	2015-8-20 13:31:07	1	49	0	0	0	0	20yrs, 20/day	Occasional	162	72	27.4348	146	90	91	97	0.938144	78	-2.338	-0.646	25	21	46.7	5.34	77	339	1.16	5	1.25	2.94	98	47	5.23	155	11.15	61.2	58.48	11.21	57	513	2.66051
514	2	2015-8-20 13:31:12	2	33	0	0	1	0	0	0	159	52	20.5688	121	80	76	91	0.835165	78			17	17	47.2	6.41	62	274	0.59	5.16	2.41	2.52	44	11	1.71	142	6.74	62	14.58	13.24	58	514	3.77193
515	2	2015-8-20 13:31:53	2	67	0	0	0	0	0	0	151	51	22.3674	103	56	74	87	0.850575	78	0.082	2.209	12	23	44.1	5.41	55	204	1.44	3.53	1.54	1.58	77	23	5.34	128	6.53	51.9	114.39	10.31	59	515	2.47898
516	2	2015-8-20 13:32:04	2	38	0	0	1	0	0	0	168	65	23.03	90	64	79	100	0.79	84			53	44	43.6	4.99	58.1	279	1.11	3.76	1.38	1.83	62	31	3.44	105	4.83	44.6	2.71	8.84	60	516	1.96052
517	2	2015-8-20 13:32:10	1	39	0	0	0	0	Occasional	Occasional	175	60	19.5918	118	76	75	88	0.852273	60			32	29	47.6	4.67	86.2	384	1.3	4.41	1.38	2.35	104	22	4.21	147	5.19	62.7	76.69	9.44	61	517	1.95932
518	2	2015-8-21 8:06:16	2	50	0	0	1	0	0	0	146	47	22.0492	142	87	74	86	0.860465	78	0.096	1.123	25	25	48.9	4.82	74	328	1.04	5.74	1.64	3.28	62	26	3.21	145	6.54	64.3	13.89	8.72	62	518	1.86802
519	2	2015-8-21 8:10:09	2	39	0	0	0	0	0	Occasional	157	53	21.5019	107	72	71	91	0.78022	76	0.675	1.164	15	14	49.6	5.79	74	238	0.96	4.31	2.36	1.79	64	44	3.7	144	5.95	63	61.67	10.99	63	519	2.82809
520	2	2015-8-21 8:11:00	2	52	1	0	1	0	0	0	149	43	19.3685	96	52	70	84	0.833333	68	-2.753	-1.61	12	20	46.5	4.74	64.3	267	1.52	4.74	1.74	2.42	71	12	2.24	125	5.29	38.2	115.48	7.09	64	520	1.49363
521	2	2015-8-21 8:12:39	2	23	0	0	0	0	0	0	162	68	25.9107	97	60	73	101	0.722772	72	1.479	1.529	11	18	47.6	4.45	83	287	0.82	4.6	1.92	2.28	58	13	2.45	133	7.13	61.8	61.83	10.91	65	521	2.15776
522	2	2015-8-21 8:12:55	1	49	0	0	0	0	20yrs, 20/day	often	175	76	24.8163	111	70	91	100	0.91	66	-2.919	-1.227	26	26	44.7	4.92	83	315	1.44	5.55	1.21	3.51	66	23	3.01	155	7.04	52.3	210.21	9.72	66	522	2.12544
523	2	2015-8-21 8:13:57	2	49	0	0	0	1	0	0	153	53	22.6409	123	69	70	91	0.769231	86	2.177	3.148	9	20	43.7	5.39	65	205	1.04	4.56	2.04	2.16	44	8	1.77	127	5.66	63.9	36.86	8.4	67	523	2.01227
524	2	2015-8-21 8:18:49	1	41	0	0	1	0	0	Occasional	172	75	25.3515	112	79	85	97	0.876289	72			27	30	47.4	6.44	76.9	315	1.01	3.97	1.4	2.02	87	30	2.44	162	6.9	57.1	156.3	13.6	68	524	3.89262
525	2	2015-8-21 8:19:14	2	32	0	0	1	0	0	0	163	47	17.6898	115	73	60	86	0.697674	76			12	18	47.9	5.46	73.6	266	0.52	3.29	1.34	1.71	45	9	1.84	139	4.84	61.8	44.36	8.71	69	525	2.11363
526	2	2015-8-21 8:21:32	2	26	0	0	0	0	0	0	164	48	17.8465	100	61	67	90	0.744444	60	0.032	0.135	10	15	46.8	5.13	51	258	0.67	4.13	1.61	2.14	61	19	1.99	137	7.09	43.1	152.93	8.87	70	526	2.02236
527	2	2015-8-21 8:21:57	1	30	0	0	1	0	11yrs, 15/day	Occasional	168	74	26.2188	105	69	81	98	0.826531	64			69	44	45.4	4.67	102	397	1	3.67	1.03	2.08	84	156	2.05	152	6.11	65.3	153.03	11.44	71	527	2.37444
528	2	2015-8-21 8:23:44	2	47	0	0	0	0	0	0	156	61	25.0657	101	67	83	98	0.846939	72	-1.072	-0.209	10	19	45.8	5.22	55	326	1.37	4.65	1.37	2.59	68	12	2.69	142	7.92	53	48.17	11.25	72	528	2.61
529	2	2015-8-21 8:23:44	1	71	0	0	0	1	40yrs, 10/day	0	157	50	20.2848	152	80	70	87	0.804598	84	-1.451	0.707	11	19	43.9	5.23	78	361	1.67	5.69	1.79	3.11	69	24	5.26	148	8.77	53.9	148.79	6.53	73	529	1.51786
530	2	2015-8-21 8:24:06	2	51	1	0	1	0	0	0	155	50	20.8117	131	81	65	87	0.747126	75	-0.097	0.987	25	27	42.9	5.17	74.4	270	0.82	6.01	1.74	3.67	102	24	2.9	144	8.31	62.5	51.6	10.08	74	530	2.31616
531	2	2015-8-21 8:24:32	2	32	0	0	1	0	0	0	158	53	21.2306	84	59	72	94	0.765957	60	-0.175	0.073	10	17	44.7	5.21	63	294	0.6	4.64	2.23	2.14	75	8	1.22	132	5.29	62	8.58	7.92	75	531	1.83392
532	2	2015-8-21 8:26:14	2	29	0	0	1	0	0	0	162	63	24.0055	105	69	85	100	0.85	70	2.094	2.262	15	13	42.7	5.21	60.9	317	1.74	4.89	1.4	2.74	65	25	1.44	144	6.61	55.6	85.44	8.27	76	532	1.91496
533	2	2015-8-21 8:26:15	2	32	0	0	1	0	0	0	157	46	18.662	110	71	67	88	0.761364	72			9	18	51.7	5.69	74	269	0.51	4.14	2.62	1.41	46	11	1.67	139	3.98	53.2	25.1	7.64	77	533	1.93207
534	2	2015-8-21 8:27:30	2	25	0	0	0	0	0	0	160	47	18.3594	102	70	63	87	0.724138	78	3.11	3.194	10	15	49	4.85	71	242	0.98	3.72	1.39	1.86	59	10	2.7	141	5.47	79.4	38.46	10.08	78	534	2.1728
535	2	2015-8-21 8:30:02	2	43							161	50	19.2894	96	60	65	89	0.730337				9	15	77.7	5.3	67.4	257	2.65	5.68	1.47	2.98	90	12	5.04	121	5.76	68.6	8.27	11.38	79	535	2.68062
536	2	2015-8-21 8:30:36	1	72	1	0	0	1	0	0	176	60	19.3698	129	71	75	90	0.833333	60	-1.662	0.51	12	19	47.8	4.96	85	251	0.63	4.8	1.7	2.62	70	26	2.4	155	5.06	61.5	388.95	9.08	80	536	2.00164
537	2	2015-8-21 8:33:24	1	43	0	0	1	0	0	Occasional	174	70	23.1206	109	73	80	100	0.8	56	1.142	2.636	19	26	48.1	5.29	98	338	1	4	1.54	2.08	65	19	4.89	155	4.53	50.1	134.42	7.91	81	537	1.85973
538	2	2015-8-21 8:34:23	2	68	0	1	1	0	0	0	155	65	27.0552	121	54	86	96	0.895833	66	3.818	6.015	16	22	42.7	5.35	83	499	1.25	5.45	1.84	3.06	84	12	4.2	132	6.35	43.8	52.1	10.52	82	538	2.50142
539	2	2015-8-21 8:35:38	2	26	0	0	1	0	0	0	162	56	21.3382	94	66	70	90	0.777778	70			14	18	51.1	5.1	71	298	0.72	4.51	2.2	2	39	12	2.87	141	5.87	56.4	18.17	13.31	83	539	3.01693
540	2	2015-8-21 8:37:02	1	42	1	0	0	0	0	Occasional	166	83	30.1205	171	114	96	105	0.914286	84	0.297	1.754	19	22	49.1	4.81	103	647	1.66	4.02	0.91	2.26	74	24	3.73	158	8.83	63.2	39.85	16.54	84	540	3.53588
541	2	2015-8-21 8:38:20	1	26	0	0	1	0	8yrs, 20/day	Occasional	170	57	19.7232	93	57	72	87	0.827586	84			14	21	48.9	4.91	85	399	1.07	3.6	1.45	1.72	78	15	15.44	148	5.42	51.5	137.44	9.33	85	541	2.03601
542	2	2015-8-21 8:39:50	1	46	1	0	0	0	20yrs, 10/day	0	170	56	19.3772	97	57	70	84	0.833333	70	-1.513	0.086	26	22	48.1	5.48	58	236	0.99	4.85	1.43	2.86	54	15	7.99	156	7.55	50.5	387.54	7.91	86	542	1.92652
543	2	2015-8-21 8:40:35	1	34	0	0	0	0	9yrs, 10/day	0	173	62	20.7157	107	60	77	92	0.836957	60	-0.537	0.557	20	19	42.4	5.48	100.5	352	0.56	3.87	1.46	2.05	51	11	2.69	153	4.66	54.2	84.65	9.45	87	543	2.3016
544	2	2015-8-21 8:41:25	1	24	0	0	1	0	0	Occasional	173	90	30.0712	137	75	94	104	0.903846	76	1.278	1.676	29	22	50.7	4.53	97	494	1.97	4.84	1.17	2.83	78	26	2.88	163	7.77	57.3	125.4	13.16	88	544	2.64955
545	2	2015-8-21 8:42:08	1	34	0	0	0	0	20yrs, 10/day	Occasional	161	69	26.6193	118	79	84	97	0.865979	80	0.578	1.672	37	44	47.5	5.55	100	550	1.77	5.91	1.99	3.16	90	176	13.05	151	10.22	70.1	143.04	8.9	89	545	2.19533
546	2	2015-8-21 8:46:14	2	29	0	0	0	0	0	0	162	46	17.5278	105	67	72	87	0.827586	72			26	28	53.6	4.71	62	314	0.57	5.17	1.88	2.76	55	14	4.02	138	3.56	50.9	77.05	6.66	90	546	1.39416
547	2	2015-8-21 8:46:17	2	38	0	0	1	0	0	0	160	50	19.5312	110	66	68	89	0.764045	84	1.149	1.599	13	19	45.5	5.54	79.6	326	0.87	3.85	1.94	1.5	58	10	2.25	122	4.82	52.6	23.02	5.89	1	547	1.45025
548	2	2015-8-21 8:46:39	1	59	0	0	1	0	0	Occasional	171	55	18.8092	109	71	68	87	0.781609	76	-0.485	1.457	12	18	44.6	5.57	100	398	0.57	4.48	2.23	2.18	73	9	3.09	151	4.05	65.5	39.74	5.95	2	548	1.47296
549	2	2015-8-21 8:48:24	1	52	0	0	0	0	0	Occasional	169	70	24.5089	113	79	88	94	0.93617	72	-0.887	0.889	59	33	47.2	4.69	90	407	1.18	4.34	1.17	2.54	74	71	6.37	165	5.81	69.9	197.62	11.11	3	549	2.31582
550	2	2015-8-21 8:49:32	2	27	0	0	1	0	0	0	154	53	22.3478	99	59	76	90	0.844444	78			12	20	50.9	4.9	59	301	0.91	5.34	2.2	2.68	102	12	4.17	137	6.53	53.1	157.26	7.91	4	550	1.72262
551	2	2015-8-21 8:50:33	1	27	0	0	0	0	Occasional	Occasional	170	68	23.5294	119	81	77	92	0.836957	84			97	42	51.4	5.24	88	335	1.24	4.79	1.44	2.71	108	73	7.99	159	5.86	59	195.81	10.81	5	551	2.51753
552	2	2015-8-21 8:52:18	2	26	1	1	1				166	60	21.7738	113	60	72	98	0.734694	72	0.793	0.895	14	19	50.6	5.07	70	195	0.64	5.42	1.85	3.14	46	13	1.39	136	5.06	52	34.62	15.29	6	552	3.44535
553	2	2015-8-21 8:52:50	1	28	0	0	0	0	5yrs, 5/day	Occasional	176	69	22.2753	141	89	83	94	0.882979	60	-1.788	-1.068	38	27	51.5	5.18	89	299	0.83	6.05	1.43	3.82	54	23	3.42	152	6.62	37.9	142.63	7.69	7	553	1.77041
554	2	2015-8-21 8:58:18	2	48	0	0	0	0	0	0	152	49	21.2084	105	70	71	88	0.806818	72	-1.681	-0.765	17	20	48.6	5.32	63	236	1.42	5.43	1.68	3.05	109	17	7.59	138	7.76	75.6	8.74	7.48	8	554	1.7686
555	2	2015-8-21 8:58:36	2	56	0	0	0	0	0	0	150	54	24	139	76	81	90	0.9	72	-2.1	-0.711	17	26	47	5.43	67	238	0.73	6	2	3.57	126	13	2.02	130	4.11	56.8	132.79	3.27	9	555	0.78916
556	2	2015-8-21 9:01:13	2	24	0	0	1	0	0	0	163	57	21.4536	97	63	70	95	0.736842	60			15	22	47.6	4.76	60.7	231	1.21	4.79	1.47	2.68	45	12	2.35	133	7.13	54.7	52.41	14.8	10	556	3.13102
557	2	2015-8-21 9:01:17	2	29	0	0	0	0	0	0	157	55	22.3133	134	89	70	90	0.777778	72			23	26	48.3	4.78	61	316	0.98	3.74	1.77	1.58	39	9	2.8	139	7.78	67	33.09	4.12	11	557	0.875271
558	2	2015-8-21 9:03:19	1	38	0	1	1	0	0	often	171	66	22.571	112	68	78	92	0.847826	76	1.036	2.327	17	18	49.1	4.64	94	359	1.73	5.74	1.24	3.72	63	14	7.3	169	6.39	56.1	264.7	10.54	12	558	2.17358
559	2	2015-8-21 9:03:36	1	27	0	0	0	0	0	Occasional	166	56	20.3223	128	75	72	90	0.8	84			21	23	48.8	4.86	105.5	372	0.57	3.76	1.82	1.67	78	17	1.78	161	4.31	51.6	110.77	4.12	13	559	0.88992
560	2	2015-8-21 9:09:14	2	43	0	0	0	0	0	0	163	46	17.3134	104	71	64	83	0.771084	76	1.558	2.221	22	24	47.4	4.66	79	330	0.67	4.37	2.2	1.96	67	34	3.02	144	5.41	55.1	48.67	1.95	14	560	0.403867
561	2	2015-8-21 9:09:45	2	33	0	0	0	0	0	0	157	58	23.5304	98	63	72	95	0.757895	72			10	15	46.5	4.33	60	289	0.7	4.57	1.3	2.82	36	8	1.27	141	5.37	52.3	23.92	10.98	15	561	2.11304
562	2	2015-8-21 9:11:29	2	31	0	0	0	0	0	0	164	48	17.8465	96	63	67	87	0.770115	90			11	17	48	4.57	56.5	233	0.44	4.81	2.62	1.97	75	9	2.02	133	4.23	55.1	60.87	3.32	16	562	0.674329
563	2	2015-8-21 9:12:10	1	24	0	0	1	0	1yr,10/day	often	174	64	21.1389	111	72	77	88	0.875	72	4.516	4.914	57	51	56.8	4.72	105	375	1.34	5.1	1.25	3.08	48	33	2.81	170	6.41	56.4	169.52	15.84	17	563	3.32288
564	2	2015-8-21 9:15:27	1	45	0	0	1	0	20yrs, 20/day	Occasional	161	60	23.1473	117	75	81	90	0.9	60	0.698	2.264	30	25	44.7	4.8	78.3	323	1.36	5.7	1.36	3.46	70	23	2.7	164	7	65.4	142.09	5.56	18	564	1.18613
565	2	2015-8-21 9:21:16	1	57	0	0	0	1	0	often	165	52	19.1001	133	91	71	90	0.788889	58	0.706	2.605	8	17	44.2	4.76	91	388	1.55	4.64	1.28	2.58	59	38	5.18	155	5.17	54.9	215.75	0.02	19	565	0.00423111
566	2	2015-8-21 9:27:07	2	26	0	0	0	0	0	0	163	45	16.937	104	70	66	85	0.776471	72	-1.196	-1.093	13	17	47.9	5.42	71	274	0.67	4.51	1.88	2.35	57	12	1.57	134	3.47	37.7	58.96	5.21	20	566	1.25503
567	2	2015-8-21 9:27:11	1	43	0	0	1	0	0	0	162	71	27.0538	124	81	81	95	0.852632	66	0.712	2.207	20	23	44.6	5.4	117	509	0.96	4.91	1.32	2.98	84	24	7.9	153	7.28	66.1	354.9	5.55	21	567	1.332
568	2	2015-8-21 9:27:35	2	22	0	0	0	0	0	0	151	45	19.736	92	56	61	84	0.72619	78	0.353	0.388	16	20	46.6	4.65	66	291	0.76	3.61	1.5	1.77	61	8	1.52	129	7.16	57.8	27.65	8.51	22	568	1.75873
569	2	2015-8-21 9:32:56	2	25	0	0	0	0	0	0	158	58	23.2335	106	66	75	97	0.773196	78			54	44	43.1	4.71	68.4	284	0.76	4.24	1.28	2.48	67	12	2.82	135	6.7	64.2	12.55	8.88	23	569	1.85888
570	2	2015-8-21 9:39:23	2	44	0	0	1	1	0	0	156	55	22.6003	90	55	73	91	0.802198	70	1.511	2.222	10	17	43.7	4.59	73	337	0.59	3.87	1.85	1.77	56	16	4.62	127	8.29	75.7	83.83	9.8	24	570	1.9992
571	2	2015-8-21 9:40:04	1	38	1	1	1	0	0	0	166	56	20.3223	114	64	70	87	0.804598	72			21	15	54.2	5.24	76	363	1.43	4.87	1.31	2.85	70	16	4.35	162	4.9	60	391.61	12.92	25	571	3.00892
572	2	2015-8-21 9:40:26	2	47	1	0	1	0	0	0	163	58	21.83	95	60	74	90	0.822222	78	-0.437	0.426	10	18	46	4.75	85	225	1	4.83	1.78	2.54	78	38	3.44	142	4.31	63.8	32.27	6.47	26	572	1.36589
573	2	2015-8-21 9:42:31	1	41	0	0	0	1	0	Occasional	166	71	25.7657	116	76	86	95	0.905263	78			42	33	48.1	5.53	92.1	369	1.07	3.71	1.14	2.06	94	15	3.37	162	4.31	52.3	76.18	11.55	27	573	2.83873
574	2	2015-8-21 9:43:06	1	28	0	0	1	0	0	Occasional	173	74	24.7252	120	63	77	94	0.819149	60			33	28	52.8	4.92	78	330	1.73	5.27	1.55	3.04	61	20	2.41	160	4.89	51.8	238.87	5.89	28	574	1.28795
575	2	2015-8-21 9:43:35	2	52	0	0	1	0	0	0	157	52	21.0962	112	63	68	93	0.731183	84	-1.649	-0.506	19	23	47.9	5.33	66	228	1.04	4.85	2.17	2.33	98	19	6.36	148	3.9	51.5	68.76	9.34	29	575	2.21254
576	2	2015-8-21 9:43:39	1	47	0	0	1	0	20yrs, 20/day	often	180	73	22.5309	124	84	80	95	0.842105	70	0.06	1.691	13	21	44.8	5.14	99	389	1.22	4.98	2.05	2.45	68	26	5.82	159	6.41	54.9	154.8	9.43	30	576	2.15423
577	2	2015-8-21 9:44:53	2	27	0	0	0	0	0	0	160	49	19.1406	104	68	61	89	0.685393	82			10	19	50.7	4.48	68.4	213	0.78	3.63	1.52	1.79	52	10	2.48	145	4.55	47.8	35.93	9.81	31	577	1.95328
578	2	2015-8-21 9:45:06	2	26	0	0	0	0	0	0	165	50	18.3655	97	56	63	92	0.684783	66	0.517	0.62	15	19	48.7	4.32	74	324	0.43	4.53	2.58	1.8	49	12	1.23	143	4.77	52.5	29.64	12.61	32	578	2.42112
579	2	2015-8-21 9:47:15	2	48	0	0	1	0	0	Occasional	156	59	24.2439	110	70	82	92	0.891304	76	1.069	1.985	23	24	49.3	5.3	65.8	362	0.84	4.72	1.6	2.59	82	14	3.34	145	3.61	41.5	209.86	10.04	33	579	2.36498
580	2	2015-8-21 9:47:40	1	34	0	1	0	0	Occasional	Occasional	181	81	24.7245	110	79	85	101	0.841584	82			100	42	51.5	4.69	80	473	1.75	6.28	1.57	3.83	70	18	4.46	160	6.78	60.5	296.43	14	34	580	2.91822
581	2	2015-8-21 9:54:30	1	42	1	0	0	0	0	Occasional	165	75	27.5482	119	76	86	98	0.877551	76			50	30	40.6	4.87	82.6	341	0.96	4.2	1.09	2.59	72	24	5.75	154	6.84	58.1	353.54	3.5	35	581	0.757556
582	2	2015-8-21 9:55:10	1	39	0	0	0	0	10yrs, 10/day	Occasional	162	62	23.6244	105	57	78	92	0.847826	66			18	32	46.2	5.26	88	423	2.01	5.88	0.97	3.66	74	16	5.02	153	5.89	64.9	112.55	11.43	36	582	2.67208
583	2	2015-8-21 9:57:07	1	27	0	0	0	0	Occasional	Occasional	170	55	19.0311	105	59	67	90	0.744444	60	1.563	2.209	42	46	51.9	4.77	96	375	0.46	3.36	1.87	1.37	66	7	4.48	154	5.19	66.4	127.86	9.59	37	583	2.03308
584	2	2015-8-21 9:59:14	1	43	0	0	1	0	20yrs, 10/day	Occasional	172	77	26.0276	100	59	88	101	0.871287	76	0.619	2.114	18	17	46.5	5.24	90	397	1.74	4.34	1.07	2.45	91	20	8.86	152	5.86	62.5	282.83	15.35	38	584	3.57484
585	2	2015-8-21 9:59:24	1	33	0	0	1	0	Occasional	Occasional	175	73	23.8367	122	75	80	96	0.833333	60			20	20	47.3	4.95	89.4	417	1.09	4	1.05	2.23	32	21	3.99	156	4.98	70.1	67.18	10.69	39	585	2.3518
586	2	2015-8-21 9:59:37	1	32	0	0	0	0	0	0	175	68	22.2041	115	73	69	94	0.734043	66			14	20	49.9	4.79	81	289	1.14	3.56	1.29	1.91	74	9	2.31	151	4.75	50	102.15	14.66	40	586	3.12095
587	2	2015-8-21 9:59:40	1	42	0	0	0	0	21yrs, 20/day	often	168	69	24.4473	133	84	86	97	0.886598	84			27	24	49.6	4.72	88	439	6.48	5.63	0.96	1.92	79	22	4.05	169	6.64	54.1	220.28	5.36	41	587	1.12441
588	2	2015-8-21 9:59:59	1	30	0	0	0	0	10yrs, 10/day	0	177	57	18.194	113	79	70	88	0.795455	72			26	21	48.5	5.06	72.8	204	1.64	5.17	1.79	2.6	88	15	2.27	168	5.98	55.2	152.75	8.58	42	588	1.92955
589	2	2015-8-21 10:00:01	2	27	0	0	1	0	0	0	164	46	17.1029	95	72	62	85	0.729412	60			21	26	47.7	4.39	77	350	0.62	3.8	1.63	1.83	58	15	4.88	129	4.53	45.2	61.7	9.81	43	589	1.91404
590	2	2015-8-21 10:00:38	2	42	0	0	0	0	0	0	159	55	21.7555	96	58	74	89	0.831461	74	0.778	1.395	25	24	47.2	5.06	55.4	212	0.54	3.65	1.76	1.57	47	8	2.35	125	6.37	59	34.42	8.64	44	590	1.94304
591	2	2015-8-21 10:01:23	1	38	0	0	0	1	6yrs, 10/day	Occasional	165	72	26.4463	100	63	86	98	0.877551	66	-2.429	-1.138	32	23	48	5.77	97	551	2.59	6.32	1.26	3.79	80	43	3.7	157	7.3	56.8	247.93	0.02	45	591	0.00512889
592	2	2015-8-21 10:01:32	1	34	0	0	1	1	4yrs, 20/day	Occasional	170	81	28.0277	109	79	94	102	0.921569	78			37	24	48.8	4.91	88	407	3.36	5.38	1.07	2.83	50	74	5.07	173	6.61	53.6	373.94	12.82	46	592	2.79761
593	2	2015-8-21 10:02:14	2	23	0	0	0	0	0	0	155	48	19.9792	97	72	72	90	0.8	72			13	22	45.5	4.91	80.6	311	1.58	4.14	2.13	1.42	56	16	1.68	145	6.96	59.4	51.91	2.52	47	593	0.54992
594	2	2015-8-21 10:02:46	1	29	0	0	0	0	Occasional	often	165	72	26.4463	114	70	90	100	0.9	72			60	62	50.2	5.27	87	405	1.29	5.14	1.44	3.05	58	55	5.15	156	5.77	41.1	305.5	11.66	48	594	2.73103
595	2	2015-8-21 10:03:35	1	25	0	0	1	0	吸烟10年，15-20支/天	often	170	68	23.5294	111	69	79	98	0.806122	78	0.733	1.218	25	25	52.7	4.36	96	618	1.65	6.11	1.27	3.83	74	69	1.96	170	5.8	62.1	163.63	7.46	49	595	1.44558
596	2	2015-8-21 10:05:56	1	55	0	0	1	0	31yrs, 20/day	Occasional	167	62	22.231	105	81	80	90	0.888889	84			30	21	47.7	4.93	88.1	319	2.12	5.87	1.33	3.63	65	26	4.39	172	6.38	49	349.92	5.53	50	596	1.21168
597	2	2015-8-21 10:05:56	2	28	0	0	1	0	0	0	157	49	19.8791	116	73	67	90	0.744444	90	0.228	0.373	11	16	49.7	5.29	68	358	0.79	3.82	2.04	1.47	74	10	2.08	128	6.9	60.6	9.25	12.7	51	597	2.98591
598	2	2015-8-21 10:06:08	1	28	0	0	0	0	0	Occasional	162	62	23.6244	138	103	81	93	0.870968	88	-0.091	0.629	114	58	43.5	4.49	115	525	1.32	5.6	1.49	3.49	93	139	3.3	132	12.37	71.2	163.17	24.08	52	598	4.8053
599	2	2015-8-21 10:06:30	1	45	0	0	0	0	12yrs, 10/day	Occasional	164	60	22.3081	111	75	73	90	0.811111	82	-0.353	1.213	27	23	48.1	5.37	81	313	1.38	4.32	1.59	2.26	75	18	3.12	152	7	52.9	74.77	6.53	53	599	1.55849
600	2	2015-8-21 10:08:21	2	27	0	0	0	0	0	0	149	45	20.2694	94	66	74	84	0.880952	66			11	17	44.8	4.83	70.9	283	0.64	4.54	1.53	2.53	61	9	3.13	146	4.23	45.4	73.69	10.17	54	600	2.18316
601	2	2015-8-21 10:08:22	2	30	0	0	1	0	0	0	161	52	20.061	102	66	73	93	0.784946	90			12	20	51.5	5.07	70	311.6	0.5	4.11	2.05	1.98	73	8	7.33	137	4.78	55	9.94			601	0
602	2	2015-8-21 10:09:35	1	34	0	0	0	0	0	0	167	61	21.8724	120	71	72	90	0.8	72			24	29	49.6	4.44	94	438	1.14	4.71	1.55	2.74	57	31	6.08	157	5.09	53.4	81.37	3.37	55	602	0.665013
603	2	2015-8-21 10:12:54	1	40	1	0	0	1	0	Occasional	168	73	25.8645	133	84	84	95	0.884211	84			20	20	48.1	5.3	104	488	0.9	5.51	1.45	3.32	77	19	3.45	153	7.96	61.2	96.96	6.85	56	603	1.61356
604	2	2015-8-21 10:13:21	1	26	1	0	0	0	Occasional	Occasional	174	65	21.4692	134	69	74	88	0.840909	78	-0.265	0.303	50	32	50.3	4.39	113	401	1.94	5.71	1.87	3.02	63	25	3.72	161	5.9	51.1	154.53	6.39	57	604	1.24676
605	2	2015-8-21 10:16:17	2	32	0	0	1	0	0	0	165	64	23.5078	94	62	82	98	0.836735	72			15	19	46.5	4.51	66	276	1.97	5.07	1.32	3	32	12	2.09	143	6.32	60.8	67.76	11.75	58	605	2.35522
606	2	2015-8-21 10:19:07	1	44	1	0	0	0	0	Occasional	174	70	23.1206	138	95	78	95	0.821053	72	-1.393	0.137	50	24	47.2	6.04	100	374	3	4.15	0.94	2.1	107	57	2.65	165	4.74	58.8	72.45	11.33	59	606	3.04148
607	2	2015-8-21 10:19:22	2	27	0	0	0	0	0	0	163	57	21.4536	109	78	76	96	0.791667	78			16	22	40.8	4.63	71.6	284	0.94	4.19	1.82	2.01	69	8	0.99	147	7.54	59.1	17.87	7.11	60	607	1.46308
608	2	2015-8-21 10:19:45	1	25	0	0	0	0	Occasional	0	177	75	23.9395	111	78	79	100	0.79	72	1.311	1.796	35	25	51	4.51	74	318	1.91	5.36	1.21	3.3	55	22	2.47	173	6.17	54.9	227.08	11.29	61	608	2.26302
609	2	2015-8-21 10:19:49	2	52	0	0	1	0	0	0	152	49	21.2084	111	78	73	88	0.829545	78	0.582	1.725	13	16	48.2	5.35	61	200	1.56	6.71	2.06	3.89	59	20	5.31	136	3.47	62.3	59.46	10.13	62	609	2.40869
610	2	2015-8-21 10:20:07	1	48	0	1	1	0	31yrs, 20/day	0	163	60	22.5827	113	74	88	91	0.967033	72			30	21	41.4	4.85	86.4	288	1.8	4.73	1.17	2.66	87	19	9.34	170	5.29	47.3	56.6	7.42	63	610	1.59942
611	2	2015-8-21 10:20:14	2	32	0	0	1	1	0	0	158	47	18.8271	106	64	65	87	0.747126	70			26	27	52.4	4.89	58	297	0.94	4.64	2.05	2.33	64	12	5.01	138	5.48	57.4	68.05	4.53	64	611	0.98452
612	2	2015-8-21 10:22:06	2	27	1	0	1	1	0	0	159	46	18.1955	108	70	65	85	0.764706	84			13	19	51.3	5.31	56	282	1.03	3.5	1.77	1.36	57	11	1.63	129	5.61	55.5	119.25	15.05	65	612	3.5518
613	2	2015-8-21 10:22:08	2	48	0	0	1	0	0	Occasional	156	51	20.9566	107	79	64	88	0.727273	72	-1.053	-0.137	10	16	46.9	5.41	87	267	0.56	4.31	2.24	2.02	53	13	6.45	140	6.6	62.8	22.65	11.02	66	613	2.6497
614	2	2015-8-21 10:22:13	1	62	1	0	1	0	0	0	176	81	26.1493	139	88	91	104	0.875	78	-1.322	0.681	26	27	47.2	5.72	95.7	437	0.8	3.66	1.66	1.7	77	16	1.77	151	8.57	57.8	146.6	1.2	67	614	0.305067
615	2	2015-8-21 10:22:15	2	35	0	0	1	0	0	0	158	56	22.4323	113	71	72	92	0.782609	84			17	20	49.6	5.91	53	355	1.87	4.5	1.26	2.57	44	16	2.32	132	6.86	51.9	30.33	15.82	68	615	4.15539
616	2	2015-8-21 10:24:17	1	55	1	0	0	0	0	Occasional	157	63	25.5588	114	70	84	91	0.923077	66			34	30	49.5	4.87	97	518	1.18	3.9	1.17	2.18	93	22	4.32	154	5.77	53.8	338.13	11.77	69	616	2.54755
617	2	2015-8-21 10:32:41	1	36	0	0	0	0	0	Occasional	174	69	22.7903	110	71	76	95	0.8	60			27	24	45.3	4.88	97.9	343	1.37	5.14	1.5	2.89	75	22	7.42	162	6.14	49.4	295.98	0.02	70	617	0.00433778
618	2	2015-8-21 10:35:23	1	53	0	0	1	0	30yrs, 20/day	0	165	70	25.7117	127	84	83	95	0.873684	68	0.545	2.347	13	14	45.9	5.25	76	362	1.14	4.01	0.91	2.47	75	14	3.13	159	7.07	64.9	175.41	4.72	71	618	1.10133
619	2	2015-8-21 10:35:41	1	24	0	0	0	0	0	0	180	67	20.679	122	81	70	95	0.736842	84	0.867	1.265	11	20	48.5	5.07	93.4	374	1.69	3.45	1.06	1.67	67	17	5.01	163	6.39	64.2	242.04	7.38	72	619	1.66296
620	2	2015-8-21 10:36:45	1	25	0	0	0	1	0	Occasional	172	69	23.3234	123	68	74	93	0.795699	88	-0.589	-0.104	52	44	52.2	4.3	91	422	0.67	4.05	1.4	2.29	88	7	1.42	181	10.57	78.4	108.58	6.15	73	620	1.17533
621	2	2015-8-21 10:37:41	2	22	0	0	1	0	0	0	157	56	22.719	111	62	68	95	0.715789	84	-0.175	-0.14	34	61	46.3	5.36	57	383	0.82	4.71	1.31	2.83	43	9	2.15	136	4.36	63.3	65.81	0.02	74	621	0.00476444
622	2	2015-8-21 10:38:36	2	50	0	0	1	1	0	0	155	55	22.8928	114	63	73	91	0.802198	90	1.892	2.919	13	18	45	5.19	85	250	0.86	4.08	1.37	2.24	66	13	3.21	132	7.67	62.1	141.68	2.55	75	622	0.5882
623	2	2015-8-21 10:38:49	2	34	0	0	0	0	0	0	167	58	20.7967	108	62	73	94	0.776596	62	-0.981	-0.673	12	16	48.2	4.48	65	339	1.17	4.42	1.66	2.24	69	13	3.01	130	5.67	65.2	33.26	4.15	76	623	0.826311
624	2	2015-8-21 10:38:49	1	40	0	0	0	0	26yrs, 20/day	20yrs, 150g/day	170	59	20.4152	129	92	72	90	0.8	72			18	21	45.7	5.26	71.1	253	0.96	4.57	1.75	2.23	80	42	3.56	169	11.03	55.4	97.09	8.36	77	624	1.95438
625	2	2015-8-21 10:38:56	2	47	0	0	1	0	0	0	157	51	20.6905	96	61	70	88	0.795455	66	-0.438	0.424	26	27	46.6	5.14	34	227	0.57	4.03	1.95	1.86	83	12	3.03	128	4.32	61.4	114.46	10.43	78	625	2.38268
626	2	2015-8-21 10:39:06	1	43	0	0	0	0	0	Occasional	161	60	23.1473	109	75	82	92	0.891304	72			38	30	48.8	4.85	94	378	1.94	5.21	1.26	3.01	95	96	4.17	159	6.82	66.8	100.79	6.5	79	626	1.40111
627	2	2015-8-21 10:39:09	2	25	0	0	0	0	0	0	153	54	23.0681	99	65	71	93	0.763441	68	1.339	1.423	15	18	49.1	4.96	55.2	247	2.9	5.31	1.3	2.84	89	11	4.72	136	6.61	65.5	36.03	13.04	80	627	2.8746
628	2	2015-8-21 10:39:14	1	39	0	0	0	0	0	Occasional	166	70	25.4028	109	73	85	95	0.894737	66			38	25	49.3	5.36	80.7	446	1.09	4.94	1.22	3.09	77	38	3.07	164	6.95	62.8	216.2	7.69	81	628	1.83193
629	2	2015-8-21 10:39:56	2	26	0	0	1	0	0	Occasional	161	48	18.5178	98	65	62	85	0.729412	66	3.891	3.994	4	11	48	4.42	58	228	0.43	4.7	2.27	2.22	52	23	2.28	138	3.97	56.1	52.9	0.02	82	629	0.00392889
630	2	2015-8-21 10:39:57	1	28	0	0	1	0	10yrs, 6/day	often	175	70	22.8571	123	76	79	95	0.831579	60			40	27	49.9	5.68	97.3	406	1.4	5.3	1.34	3.16	63	43	6.32	157	4.25	51.2	123.35	5.29	83	630	1.33543
631	2	2015-8-21 10:40:04	2	71	1	0	0	0	0	0	154	49	20.6612	113	64	72	89	0.808989	70			20	26	46.9	6.4	78	300	2.05	4.56	1.33	2.47	91	19	3.22				343.74	16.23	84	631	4.61653
632	2	2015-8-21 10:40:19	2	27	0	0	0	0	0	0	158	48	19.2277	97	55	64	90	0.711111	80			21	23	45.1	4.91	61.5	233	0.46	4.19	1.75	2.15	48	11	4.07	138	4.02	49.8	50.39	2.83	85	632	0.617569
633	2	2015-8-21 10:40:33	2	46	0	0	0	0	0	0	155	50	20.8117	99	56	68	86	0.790698	80	1.213	2.025	13	19	47.7	4.73	75	244	0.97	5.19	2.08	2.68	78	11	4.95	141	5.49	47.7	79.88	9.1	86	633	1.91302
634	2	2015-8-21 10:40:46	1	32	0	0	0	0	0	Occasional	169	69	24.1588	109	72	80	98	0.816327	66			31	32	47.3	5.5	89	514	1.12	4.76	1.4	2.77	91	12	4.88	171	5.75	61.3	243.61	9.71	87	634	2.37356
635	2	2015-8-21 10:40:48	1	27	0	1	1	0	0	Occasional	165	66	24.2424	137	85	77	93	0.827957	74			22	23	50.4	5.48	88.3	398	0.94	4.77	1.25	3	75	37	2.51	162	5.38	49.1	106.06	8.56	88	635	2.08484
636	2	2015-8-21 10:40:49	1	33	0	0	1	0	0	Occasional	171	74	25.3069	107	68	79	99	0.79798	78			23	19	50.8	5.84	84.4	486	1.22	5.64	1.58	3.19	59	14	1.79	163	6.98	60.3	284.9	11.96	89	636	3.10428
637	2	2015-8-21 10:40:55	1	35	0	1	0	0	12yrs, 10/day	Occasional	169	75	26.2596	104	69	84	101	0.831683	60			17	18	46.9	5.05	97	377	1.41	4.14	1.1	2.4	85	20	2.58	160	7.05	35.3	161.03	9.1	90	637	2.04244
638	2	2015-8-21 10:41:35	1	36	0	0	1	0	5yrs, 20-40/day	Occasional	172	74	25.0135	120	77	78	97	0.804124	78			45	43	50.1	5.47	115	408	2.91	3.77	1	1.62	79	44	2.93	172	6.98	57.8	141.36	11.3	1	638	2.74716
639	2	2015-8-21 10:42:16	1	26	0	0	0	1	0	Occasional	161	64	24.6904	112	77	76	96	0.791667	72			27	23	49.8	4.48	86	352	0.86	4.12	1.79	1.9	114	13	3.24	165	6.81	62.6	240.52	10	2	639	1.99111
640	2	2015-8-21 10:42:20	2	48	0	0	1	0	0	0	157	49	19.8791	121	67	72	87	0.827586	78	0.943	1.86	13	17	43.9	5.24	61.3	247	1.07	5.36	2.15	2.71	50	14	5.14	131	5.9	65	39.2	11.41	3	640	2.65726
641	2	2015-8-21 10:42:27	1	29	0	0	0	1	0	0			#DIV/0!					#DIV/0!	70			68	41	51.1	4.99	89	434	2.38	4.72	1.08	2.72	97	78	1.79	164	8.73	48.6	146.61	16.93	4	641	3.7547
642	2	2015-8-21 10:43:15	1	42	1	0	1	0	7yrs, 20/day	Occasional	164	57	21.1927	99	63	77	89	0.865169	56			44	33	44.8	6.41	90	388	1.02	4.3	1.53	2.25	71	37	2.44	158	5.01	66.1	260.13	10.36	5	642	2.95145
643	2	2015-8-21 10:43:22	2	47	0	0	1	1	0	0	153	45	19.2234	97	49	65	87	0.747126	72	-0.742	0.12	10	21	45.6	4.58	64	270	0.51	5.24	2.17	2.79	88	10	2.92	124	3.91	54.9	153.48	5.63	6	643	1.14602
644	2	2015-8-21 10:43:29	1	41	0	0	1	0	Occasional	Occasional	174	95	31.378	106	63	100	109	0.917431	66			27	24	45	5.25	84.1	544	2.26	4.9	1.08	2.78	64	29	3.89	167	6.26	58.8	312.77	25.63	7	644	5.98033
645	2	2015-8-21 10:43:37	2	46	0	0	0	0	0	0	153	59	25.204	112	77	78	95	0.821053	90	2.546	3.357	16	23	46.9	6.66	79	325	1.39	5.23	1.52	3.08	54	22	6.12	148	5.89	57.4	57.1	12.45	8	645	3.6852
646	2	2015-8-21 10:44:29	1	18	0	0	1	0	0	Occasional	171	60	20.5191	125	68	66	86	0.767442	86	-0.249	-0.101	15	20	52	4.8	96.8	373	1.48	3.4	1.18	1.55	86	13	1.36	172	4.63	51.3	89.59	13.89	9	646	2.9632
647	2	2015-8-21 10:44:36	1	26	0	0	0	0	0	Occasional	171	56	19.1512	114	81	66	87	0.758621	78			20	25	51.5	5.22	89.3	383	0.77	4.56	1.8	2.42	67	16	2.67	149	6.17	53.5	70.76	11.14	10	647	2.58448
648	2	2015-8-21 10:44:39	1	59	1	0	0	0	吸烟30年，10支/天	often	169	66	23.1084	145	92	86	94	0.914894	66	-2.105	-0.163	24	19	44.3	8.88	94	361	1.61	5.02	1.36	2.87	104	22	3.77	151	9.24	65.6	193.03	14.76	11	648	5.82528
649	2	2015-8-21 10:45:03	1	45	1	0	0	0	Occasional	Occasional	166	65	23.5883	122	85	80	95	0.842105	80	1.262	2.828	17	17	47.2	5.17	111.3	534	1.24	5.45	1.83	3.01	71	13	2.09	169	6.25	63.5	121.63	9.77	12	649	2.24493
650	2	2015-8-21 10:45:11	1	28	0	0	0	0	0	Occasional	162	59	22.4813	118	66	74	90	0.822222	72			14	17	49	4.99	92.9	337	1.14	3.77	0.94	2.2	85	17	3.4	152	6.57	59.4	79.94	11.18	13	650	2.47948
651	2	2015-8-21 10:45:50	2	52	0	0	1	0	0	0	163	53	19.9481	116	62	72	92	0.782609	78	-1.783	-0.64	16	20	42.1	4.73	61	206	1.09	5.11	1.62	2.82	55	11	6.15	127	5.42	54.3	7.02	15.36	14	651	3.22901
652	2	2015-8-21 10:46:09	2	37	0	0	0	0	0	0	161	58	22.3757	102	69	66	95	0.694737	80			9	22	47.7	5.02	64	336	0.52	4.35	1.93	2.11	70	9	4.98	135	5.44	52	12.24	10.2	15	652	2.27573
653	2	2015-8-21 10:51:06	1	50	0	0	1	0	0	0			#DIV/0!					#DIV/0!	72			12	35	48.1	4.38	71	404	1.98	5.72	1.11	3.49	68	17	3.47	147	6.1	61.9	306.58	17.05	16	653	3.31907
654	2	2015-8-21 11:10:34	2	40	0	0	0	0	0	0	166	55	19.9594	106	63	70	93	0.752688	64	-0.633	-0.103	16	28	42.3	5.11	63	106	0.58	4.2	1.7	2.23	52	9	1.67	85	3.6	53	3.46	0.02	17	654	0.00454222
655	2	2015-8-21 11:17:22	2	27	0	0	0	0	0	0	171	56	19.1512	92	69	68	95	0.715789	70	-0.977	-0.854	13	15	49.8	4.92	72	246	1.34	3.15	1.56	1.21	43	22	2	129	4.6	57.7	72.21	13.8	18	655	3.0176
656	2	2015-8-22 10:58:33	2	29	1	0	0	0	0	0	156	58	23.833	120	78	77	92	0.836957	72			55	23	46.4	4.68	51.4	246	1.06	3.52	1.66	1.4	49	37	2.06	147	4.62	60.4	64.53	15.64	19	656	3.25312
657	2	2015-8-22 8:41:09	1	29	0	0	0	0	0	Occasional	170	75	25.9516	109	67	86	102	0.843137	72			16	17	46.8	4.91	88.2	379	2.55	4.36	1.16	2.41	82	17	2.98	147	9.38	62.1	334.45	19.04	20	657	4.15495
658	2	2015-8-22 10:23:21	1	28	0	0	0	0	0	0	172	75	25.3515	113	70	85	95	0.894737	72			27	24	51.2	4.99	74	413	1.48	3.77	1.12	2.06	70	44	2.48	164	6.92	58.5	350.97	19.63	21	658	4.3535
659	2	2015-8-22 10:23:28	1	36	0	0	1	1	11yrs, 20/day	Occasional	176	64	20.6612	130	86	73	93	0.784946	72	-1.926	-0.73	51	44	49.1	4.75	82	441	1.18	5.69	1.82	3.29	67	22	3.21	158	6.11	64.3	206.45	10.37	22	659	2.18922
660	2	2015-8-22 9:04:29	1	44	0	0	0	0	14yrs, 20/day	Occasional	168	66	23.3844	107	67	80	100	0.8	62	-0.099	1.432	28	25	48.8	4.19	77	301	1.68	6.59	1.39	4.24	99	19	12.62	170	9.35	56.6	280.77	11.85	23	660	2.20673
661	2	2015-8-22 10:16:40	2	25	0	0	1	0	0	0	157	60	24.3418	105	73	75	97	0.773196	84			21	20	49.8	5.41	55	409	1.93	5.72	1.27	3.55	71	27	2.43	144	8.69	59.4	56.68	21.11	24	661	5.07578
662	2	2015-8-22 10:56:55	2	22	0	0	0	0	0	0	160	51	19.9219	99	68	68	87	0.781609	84			12	18	48.5	4.73	58	264	1.05	4.92	1.79	2.5	51	11	1.21	138	5.93	53.8	83.08	16.91	25	662	3.55486
663	2	2015-8-22 10:16:30	2	30	1	0	1	1	0	0	158	48	19.2277	100	70	62	86	0.72093	96			13	13	45.7	4.2	54	209	1.09	4.25	2.11	1.74	64	8	3.06	104	9.49	62.4	3.37	11.65	26	663	2.17467
664	2	2015-8-22 10:17:09	2	47	0	0	0	0	0	0	157	69	27.993	95	67	81	98	0.826531	74	1.72	2.583	16	20	46.9	4.44	57	301	1.37	4.44	1.82	2.12	76	12	2.19	128	6.96	71.4	67.67	10.77	27	664	2.12528
665	2	2015-8-22 10:56:12	2	77	1	0	0	0	0	0	152	36	15.5817	149	75	70	78	0.897436	90	-3.274	-0.452	17	35	46.1	4.75	96	205	1.24	6.06	2.62	2.9	73	12	3.71	149	3.97	64.9	52.69	7.32	28	665	1.54533
666	2	2015-8-22 9:09:08	1	43	0	0	0	0	21yrs, 15/day	Occasional	160	64	25	96	67	81	95	0.852632	74			18	20	50.5	4.65	90	437	1	5.56	1.67	3.26	78	29	2.64	160	6.8	61.5	138.1	8.52	29	666	1.7608
667	2	2015-8-22 9:57:37	1	33	0	0	0	0	0	Occasional	172	60	20.2812	121	74	69	90	0.766667	56	2.377	3.416	19	20	46.9	4.64	90	495	1.39	7.23	1.89	4.52	65	22	2.17	161	4.41	43.8	200.26	7.64	30	667	1.57554
668	2	2015-8-22 10:00:54	1	26	0	0	1	0	0	0	173	70	23.3887	116	82	82	100	0.82	98	-0.384	0.183	48	29	51	4.93	92.8	426	1.5	3.97	1.17	2.05	88	30	5.98	170	10.36	74.6	246.71	12.16	31	668	2.66439
669	2	2015-8-22 10:39:08	1	26	0	0	0	0	0	Occasional	171	61	20.8611	125	72	72	91	0.791209	56			15	21	48.8	4.91	77	403	0.61	3.63	1.24	2.07	91	33	3.94	166	5.88	59.7	92.13	10.39	32	669	2.26733
670	2	2015-8-22 10:56:49	2	28	0	0	0	0	0	0			#DIV/0!	115	64			#DIV/0!	72			9	17	47.1	4.31	61	348	1.62	4.97	1.14	3.01	58	9	3.01	131	6.37	53.9	24.25	16.24	33	670	3.11086
671	2	2015-8-22 8:37:23	1	31	0	1	1	0	0	Occasional	169	57	19.9573	108	76	77	90	0.855556	84			13	16	50.4	4.34	78	465	0.74	4.47	1.79	2.26	57	14	6.19	161	5.4	53	274.58	7.06	34	671	1.3618
672	2	2015-8-22 9:27:42	1	28	0	0	1	0	0	0	164	55	20.4491	121	76	75	91	0.824176	90	2.169	2.889	15	26	47.1	4.59	89.1	308	0.71	3.71	1.46	1.93	60	15	3.74	162	3.35	34.1	157.29	9.58	35	672	1.95432
673	2	2015-8-22 10:52:16	1	28	0	0	0	0	0	Occasional	171	72	24.623	104	64	89	98	0.908163	60			15	15	50.3	5.4	63	368	0.99	4.1	0.9	2.66	84	14	2.41	153	4.55	49.9	159.82	11.23	36	673	2.6952
674	2	2015-8-22 9:19:28	1	44	0	0	1	0	0	Occasional	165	67	24.6097	121	78	89	95	0.936842	68	-1.262	0.268	52	30	45.2	5.24	97.2	384	1.03	4.05	1.03	2.37	94	55	5.02	159	3.72	46.6	349.94	13.77	37	674	3.20688
675	2	2015-8-22 10:49:37	2	33	0	0	1	0	0	0	157	43	17.4449	106	67	62	85	0.729412	72	-0.42	-0.143	17	17	49.4	4.77	58	251	0.73	3.32	1.57	1.48	57	21	1.87	116	7.18	55.1	35.11	15.69	38	675	3.32628
676	2	2015-8-22 10:17:56	2	25	0	0	0	1	0	0	151	38	16.6659	103	60	56	79	0.708861	90	-1.37	-1.286	14	19	46.9	5.04	61	332	0.69	4.14	1.59	1.12	55	14	0.77	143	5.79	50	21.92	12.57	39	676	2.81568
677	2	2015-8-22 10:12:34	2	64	0	0	1	0	0	0	153	46	19.6506	135	73	75	85	0.882353	84	-1.045	0.875	43	35	48.4	6.04	61.2	271	1.18	4.4	1.38	2.48	106	42	7.78	120	3.6	48.3	370.58	9.68	40	677	2.59854
678	2	2015-8-22 10:14:26	2	61	1	0	1	0	0	0	156	53	21.7784	130	78	75	89	0.842697	74	-2.886	-1.171	15	26	45.7	5.2	64.7	248	1.77	4.6	1.41	2.34	80	9	9.3	122	5.63	48.3	99.73	12.96	41	678	2.9952
679	2	2015-8-22 10:15:01	2	73	1	0	0	0	0	0	152	45	19.4771	122	71	66	82	0.804878	58	0.292	2.837	15	27	44.6	5.24	65	319	1.36	6.94	2.09	4.18	126	28	4.64	135	5.6	57	148.96	11.32	42	679	2.6363
680	2	2015-8-22 10:55:59	2	28	0	0	1	1	0	0	150	42	18.6667	94	67	61	84	0.72619	84	1.953	2.098	32	29	47.3	4.35	57	304	0.67	3.93	1.78	1.87	75	13	1.63	130	7.21	59.6	58.19	10.62	43	680	2.0532
681	2	2015-8-22 10:55:23	2	75	1	0	0	0	0	0	155	50	20.8117	138	76	73	87	0.83908	74	0.948	3.632	15	19	45.9	5.1	75	364	0.78	5.41	1.59	3.21	62	15	1.73	134	6.81	50.7	151.49	10.2	44	681	2.312
682	2	2015-8-22 10:13:31	2	31	0	0	1	0	0	0	165	45	16.5289	83	55	63	88	0.715909	70			18	19	50.7	5.22	55	295	1.71	5.63	2.24	2.69	60	18	4.1	143	7.64	50.2	68.76	10.22	45	682	2.37104
683	2	2015-8-22 9:42:19	1	37	0	0	0	0	0	Occasional	177	85	27.1314	123	74	96	103	0.932039	72	0.017	1.261	32	35	46	4.24	94.6	378	2.03	4.33	1.01	2.31	85	17	2.29	155	5.68	56	156.02	11.66	46	683	2.19726
684	2	2015-8-22 10:52:38	1	30	0	0	1	0	0	Occasional	160	68	26.5625	111	73	84	96	0.875	76			38	21	51.7	5.13	68	418	2.26	4.73	0.96	2.8	52	24	5.95	163	6.13	54.5	267.35	13.67	47	684	3.11676
685	2	2015-8-22 9:37:18	1	28	0	0	0	0	0	Occasional	175	86	28.0816	115	76	61	91	0.67033	60			29	29	46.7	4.87	103.4	421	1.91	4.31	1.04	2.53	83	20	1.37	160	8.12	63.5	111.67	15.4	48	685	3.33324
686	2	2015-8-22 10:15:53	2	81	1	0	0	0	0	0	152	61	26.4024	166	83	93	95	0.978947	62			17	29	41	5.29	73.8	260	1.08	6.84	2.47	3.84	77	16	2.81	159	5.84	68.4	91.76	8.83	49	686	2.07603
687	2	2015-8-22 10:14:23	2	28	0	0	1	0	0	0	157	50	20.2848	116	70	69	88	0.784091	62			9	16	44.5	4.78	56	278	0.78	5.14	1.76	2.81	56	7	1.8	137	8.6	74.4	16.85	12.33	50	687	2.61944
688	2	2015-8-22 10:04:13	1	45	0	0	0	0	Occasional	Occasional	172	73	24.6755	107	68	88	97	0.907216	60	-1.967	-0.402	19	17	49.2	6.16	86	461	1.23	3.76	1.35	1.87	83	19	5.96	148	5.53	65.5	145.88	10.82	51	688	2.96228
689	2	2015-8-22 10:15:39	2	40	0	0	1	0	0	0	154	50	21.0828	115	68	72	87	0.827586	84	0.973	1.504	27	32	44.4	5.24	39	241	0.98	5.68	1.81	3.24	56	17	2.28	144	3.97	66.9	67.85	15.79	52	689	3.67732
690	2	2015-8-22 10:17:54	1	34									#DIV/0!					#DIV/0!				74	59	53.3	6.23	79	377	4.92	6.41	1	3.49	114	139	2.69	161	8.66	55	248.77	31.06	53	690	8.60017
691	2	2015-8-22 10:57:55	2	45	0	0	1	1	0	0	163	56	21.0772	103	63	72	91	0.791209	72	-1.202	-0.442	21	22	43.1	5.52	68.3	356	0.71	4.69	1.35	2.82	72	16	7.91	139	7.84	65.8	60.42	10.34	54	691	2.53675
692	2	2015-8-22 10:00:24	2	24	0	0	0	0	0	0	168	45	15.9439	98	69	62	83	0.746988	84			7	16	46.8	5.07	48	222	1.24	4.47	1.33	2.49	61	7	0.9	139	4.5	47.8	51.78	11.98	55	692	2.69949
693	2	2015-8-22 9:47:26	1	70	0	0	0	1	0	0	168	62	21.9671	123	66	81	95	0.852632	72	0.52	2.662	22	25	44.5	4.85	98	478	1.01	6.23	1.05	4.3	71	15	6.06	129	5.99	55.8	78.07	9.5	56	693	2.04778
694	2	2015-8-22 10:16:45	2	34	0	0	1	0	0	0	160	52	20.3125	93	64	69	87	0.793103	74	3.243	3.551	13	20	50.5	5.55	58	297	0.9	4.91	1.68	2.59	55	17	2.41	139	7.29	75	20.05	13.17	57	694	3.2486
695	2	2015-8-22 10:50:43	1	46	0	0	0	0	0	0	158	69	27.6398	134	79	88	97	0.907216	76	1.733	3.332	53	28	50.6	5.22	68	338	2.33	5.24	1.1	3.14	79	76	4.35	162	4.42	61.5	150.23	9.15	58	695	2.1228
696	2	2015-8-22 10:21:58	1	49	0	0	1	0	Occasional	often	173	72	24.0569	145	89	84	96	0.875	72	-0.738	0.954	13	15	51.6	5.29	68	250	1.36	5.65	1.77	3.22	61	21	3.69	156	8.42	72	504.77	13.44	59	696	3.15989
697	2	2015-8-22 9:40:43	1	27	0	0	1	0	7yrs, 10/day	Occasional	166	77	27.9431	126	69	91	105	0.866667	72	-0.614	0.031	26	26	47.6	4.92	69	339	1.24	4.56	1.28	2.58	91	32	2.05	159	7.42	67.5	244.65	10.2	60	697	2.2304
698	2	2015-8-22 9:55:59	1	34	0	0	0	0	12yrs, 5/day	0	174	66	21.7994	110	88	80	95	0.842105	70	1.052	2.146	11	17	48.1	4.12	83	357	1.69	3.36	1.18	1.5	92	16	2.85	162	5.48	62.3	125.97	14.04	61	698	2.57088
699	2	2015-8-22 10:52:50	1	49	0	1	1	0	0	Occasional	166	61	22.1367	113	84	86	94	0.914894	82	-0.508	1.184	38	28	51.2	4.31	69	331	2.24	5.73	1.31	3.5	91	34	4.24	164	5.87	57.9	251.87	13.43	62	699	2.57259
700	2	2015-8-22 10:16:34	2	22	0	0	1	0	0	0	155	42	17.4818	92	60	60	82	0.731707	84			14	22	46.3	3.91	55.9	255	0.84	4.43	1.69	2.31	50	11	1.54	131	6.36	54	38.56	8.43	63	700	1.46495
701	2	2015-8-22 10:04:54	2	43	0	0	1	0	0	0	149	43	19.3685	101	62	58	83	0.698795	74	-0.007	0.656	9	19	47.5	4.81	52	260	1.09	4.1	1.85	1.83	40	12	2.17	134	4.4	48.8	60.36	10.4	64	701	2.22329
702	2	2015-8-22 8:57:00	1	41	1	0	1	0	0	Occasional	166	66	23.9512	115	63	87	95	0.915789	72	-2.513	-1.095	34	27	47.6	5.17	59	336	0.67	5.32	1.61	3.17	76	44	3.9	160	5.83	62.1	101	10.8	65	702	2.4816
703	2	2015-8-22 8:26:36	1	84	1	0	1	0	0	0	164	63	23.4236	122	63	91	95	0.957895	78			18	16	44.6	5.48	92	393	1.48	3.86	1.58	1.69	86	25	2.26	154	6.97	59.8	166.19	13.71	66	703	3.33915
704	2	2015-8-22 10:59:25	2	37	0	0	0	0	0	Occasional	167	57	20.4382	99	74	79	96	0.822917	72	-0.135	0.277	11	18	48.1	4.67	62	318	1.46	4.89	1.52	2.68	54	12	2.34	120	9.8	71.6	3.79	12.11	67	704	2.5135
705	2	2015-8-22 10:17:15	2	24	0	0	0	0	0	0	157	45	18.2563	101	63	58	88	0.659091	66			26	22	47.9	4.76	57	340	0.77	4.49	2.36	1.9	78	12	2.31	136	6.28	58.9	48.82	12.34	68	705	2.6106
706	2	2015-8-22 10:59:12	2	29							157	45	18.2563	101	63	58	86	0.674419	84	0.521	0.689	16	19	49.5	5.59	54	248	1.13	4.1	1.48	2.09	58	15	1.89	134	7.4	65.5	44.83	14.36	69	706	3.56766
707	2	2015-8-22 10:58:46	2	22	0	0	1	0	0	0	161	54	20.8325	111	71	65	93	0.698925	72			13	18	49.2	5.35	54	232	0.7	4.18	1.6	2.26	68	12	2.6	143	5.71	62.4	74.74	13.09	70	707	3.11251
708	2	2015-8-22 8:16:38	1	65									#DIV/0!					#DIV/0!		-1.701	0。358	13	21	46.8	4.23	78	538	1.85	5.74	1.1	3.76	78	21	1.65	146	6.47	45.4	109.86	15.35	71	708	2.8858
709	2	2015-8-22 8:53:53	1	44	0	0	0	1	20yrs, 20/day	often	165	70	25.7117	107	72	92	100	0.92	60	-0.63	0.901	28	22	46.6	5.37	68	397	1.22	4.43	1.36	2.41	68	34	3.85	171	6.67	64.3	132.49	14.06	72	709	3.35565
710	2	2015-8-22 9:31:52	1	38	0	0	1	0	0	often	165	76	27.9155	126	82	95	104	0.913462	66	0.135	1.426	13	18	49.8	5.04	66	335	1.49	5.46	1.82	2.97	60	44	4.8	153	5.85	61	273.55	12.56	73	710	2.81344
711	2	2015-8-22 10:16:48	1	78	1	0	1	1	0	Occasional	155	60	24.974	91	56	91	95	0.957895	76	-2.468	-0.213	12	26	41.4	4.99	127	501	1.27	4	1.18	2.08	115	56	2.83	92	5.14	64	28.79	9.8	74	711	2.17342
712	2	2015-8-22 9:10:56	1	23	0	0	0	0	Occasional	Occasional	176	51	16.4644	117	83	70	85	0.823529	60			10	18	51.5	4.94	88	333	0.63	3.42	1.94	1.31	80	11	3.26	162	7.36	53.8	350.97	10.13	75	712	2.2241
713	2	2015-8-22 8:30:08	1	80	1	0	0	0	0	Occasional	154	61	25.721	159	75	95	96	0.989583	72			24	33	48.6	6.92	72	414	1.04	4.84	1.31	2.95	80	30	2.49	154	7.53	64.5	128.87	14.71	76	713	4.52414
714	2	2015-8-22 10:14:37	2	72	1	0	1	0	0	0	155	51	21.2279	112	67	79	90	0.877778	75	-1.819	0.657	12	21	43.2	5.65	73.1	364	1.17	4.41	1.26	2.51	25	15	3.25	135	7.53	70.8	110.95	7.82	77	714	1.96369
715	2	2015-8-22 10:15:33	2	44	0	0	1	0	0	0	158	74	29.6427	104	68	89	104	0.855769	74			13	20	42.9	5.44	50	340	1.23	5.07	1.52	2.86	61	17	1.74	134	5.25	53.9	9.03	16.63	78	715	4.02076
716	2	2015-8-22 10:23:45	1	21	0	0	0	0	0	Occasional	174	45	14.8633	93	67	57	80	0.7125	80	-0.228	-0.124	9	18	56.2	5.16	72	398	0.74	3.68	1.51	1.87	76	18	2.57	161	5.61	37.8	122.9	12.06	79	716	2.76576
717	2	2015-8-22 9:40:18	1	24	0	0	0	0	0	0	168	59	20.9042	122	76	73	93	0.784946	76			16	20	50.5	5.19	65	406	0.68	4.55	1.47	2.61	60	13	1.45	152	10.84	73.4	215.74	11.74	80	717	2.70803
718	2	2015-8-22 8:39:36	1	30	0	0	0	0	0	0	167	68	24.3824	123	86	85	96	0.885417	66			49	30	51.4	4.82	71	382	4.96	4.85	0.84	2.25	108	67	4.12	163	6.57	55.4	242.58	38.09	81	718	8.15972
719	2	2015-8-22 10:50:36	2	66	1	0	1	0	0	0	158	53	21.2306	105	56	74	92	0.804348	60	-2.198	-0.14	12	21	50.6	5.36	65	300	1.62	6.36	1.92	3.8	67	17	2.44	146	5.68	38.1	93.21	13.14	82	719	3.13024
720	2	2015-8-22 10:02:44	1	22	0	0	0	0	0	Occasional	174	73	24.1115	135	70	84	102	0.823529	68			29	23	52	4.55	79.7	380	1.25	5.41	1.22	3.37	75	20	1.99	170	5.43	60.2	96.83	10.34	83	720	2.09098
721	2	2015-8-22 8:50:53	1	49	0	0	1	0	30yrs, 20/day	Occasional	169	70	24.5089	105	65	86	98	0.877551	72	0.715	2.407	18	23	46.7	4.4	85	425	2.35	5.56	1.16	3.4	78	27	4.29	159	11.2	67	169.5	9.16	84	721	1.79129
722	2	2015-8-22 10:09:52	2	41	0	0	1	0	0	0	154	48	20.2395	100	63	71	84	0.845238	80	-1.059	-0.485	34	26	44.6	4.61	59	210	1.62	5.93	1.31	3.79	74	217	7.95	143	8.28	65.7	54.91	12.24	85	722	2.50784
723	2	2015-8-22 9:49:30	1	26	0	0	0	0	0	0	171	68	23.255	115	73	82	100	0.82	84	-0.029	0.539	29	26	48.3	5.08	86.4	392	0.83	3.8	1.25	2.05	69	19	4.3	163	4.93	63.9	426.14	15.34	86	723	3.46343
724	2	2015-8-22 10:21:32	1	75	0	0	0	0	0	0	167	60	21.5139	126	67	85	93	0.913978	60	-1.942	0.273	17	28	46.9	5.6	62	392	1.09	7	2.04	4.26	53	17	6.87	145	5.87	35.9	149.31	8.26	87	724	2.05582
725	2	2015-8-22 10:58:18	2	35	0	0	0	0	0	0	154	50	21.0828	100	64	67	87	0.770115	72			13	17	42.4	4.57	64.1	306	0.84	4.54	1.35	2.62	75	13	1.71	103	4.79	50.9	2.78	11.33	88	725	2.30125
726	2	2015-8-22 10:49:50	2	30	0	0	1	0	0	0	157	57	23.1247	100	65	77	92	0.836957	80			12	16	47	5.31	57	336	1.52	5.31	1.83	2.8	53	10	5.42	132	6.1	65.8	7.28	12.78	89	726	3.01608
727	2	2015-8-24 10:34:19	1	51									#DIV/0!					#DIV/0!				29	24	46.2	5.57	90	341	1.7	4.61	1.29	2.54	118	8	3.59	145	7.55	53.9	149.49	13	1	727	3.21822
728	2	2015-8-24 10:53:57	2	42	0	0	1	0	0	0	159	57	22.5466	117	72	71	94	0.755319	68	-0.061	0.557	17	30	49.6	5.03	50	172	1.54	6.13	3.02	2.02	49	14	2.75	125	5.22	56.9	14.62	11.39	2	728	2.5463
729	2	2015-8-24 11:05:20	1	52	0	0	0	0	10yrs, 20/day	Occasional	169	77	26.9598	106	76	89	100	0.89	60			46	26	46.1	4.75	71	344	1.4	5.08	1.66	2.78	81	19	2.72	146	6.02	50	99.17	14.5	3	729	3.06111
730	2	2015-8-24 9:49:01	2	24	0	0	1	0	0	0	158	50	20.0288	135	79	66	92	0.717391	80			12	20	48.9	3.86	59	354.9	0.57	5.32	2.33	2.93	41	9	2.07	134	5.93	53.1	26.3	12.19	4	730	2.09126
731	2	2015-8-24 8:50:05	2	45	0	0	1	0	0	0	153	61	26.0584	120	70	77	95	0.810526	78			44	22	43.9	5	64	319	0.71	5.08	2.31	2.47	56	32	2.34	142	5.85	67.8	48.72	18.41	5	731	4.09111
732	2	2015-8-24 11:05:06	1	51	0	0	0	0	25yrs, 20/day	Occasional	164	79	29.3724	127	89	97	98	0.989796	66			21	19	43	6.05	63.5	305	2.31	4.53	0.88	2.5	81	33	1.96	138	5.6	65	10.24	26.52	6	732	7.13093
733	2	2015-8-24 8:58:11	2	65							159	74	29.271	127	89	97	98	0.989796	84			42	38	43.8	5.66	64.7	271	0.93	3.31	1.91	1.12	70	27	3.77	123	5.3	71.7	149.31	12.8	7	733	3.21991
734	2	2015-8-24 11:07:53	1	57	0	1	1	0	20yrs, 20/day	often	166	69	25.0399	160	92	83	87	0.954023	50			26	27	45.4	4.79	80.1	337	1.67	3.67	1.06	1.9	65	18	2.26	129	4.42	66.4	137.33	11.82	8	734	2.51635
735	2	2015-8-24 10:58:02	2	29	0	0	1	0	0	0	157	43	17.4449	112	74	67	83	0.807229	72			14	23	46.7	4.76	65	383	1.08	2.75	1.17	1.16	76	21	2.39	150	6.91	71.6	99.17	11.04	9	735	2.33557
736	2	2015-8-24 10:31:13	1	42	0	0	1	0	0	Occasional	166	69	25.0399	119	66	83	97	0.85567	76			16	21	49.1	5.35	81	348	1.34	4.52	1.23	2.73	49	14	6.52	142	5.16	56.9	154.65	19.59	10	736	4.65807
737	2	2015-8-24 10:16:18	2	39	0	0	0	0	0	0	161	45	17.3604	106	63	62	84	0.738095	72			18	21	51.1	5.18	78	300	0.97	5.74	2.44	2.84	59	14	2.97	144	6.98	51.4	34.53	14.17	11	737	3.26225
738	2	2015-8-24 8:55:36	2	40	0	0	1	1	0	0	161	54	20.8325	135	98	69	89	0.775281	96	3.503	4.033	13	16	45.2	4.65	72.9	237	0.84	4.3	2.15	1.78	83	19	5.56	145	4.18	69.4	17.99	14.38	12	738	2.97187
739	2	2015-8-24 10:52:53	2	52	1	1	0	0	0	0	157	54	21.9076	138	74	76	88	0.863636	72			24	35	48.7	4.06	53	261	1.55	5.29	1.62	3.09	70	26	2.4	137	6.5	54.9	29.38	12.65	13	739	2.28262
740	2	2015-8-24 9:35:22	1	62	1	0	1	0	46yrs, 10/day	25yrs, 25g/day	164	64	23.7954	112	66	84	92	0.913043	58	-1.22	0.783	11	19	43.8	5.21	75	224	1.53	4.84	1.33	2.78	73	23	3.48	150	7.81	59.2	188.51	19.61	14	740	4.5408
741	2	2015-8-24 8:29:37	1	39	0	0	1	1	0	0	169	66	23.1084	125	64	83	96	0.864583	80	-0.078	1.256	41	32	45.4	4.61	104.1	483	1.48	5.21	1.15	3.27	51	19	3.19	168	4.97	55.8	408.71	16.57	15	741	3.39501
742	2	2015-8-24 10:58:20	1	36	0	1	0	0	0	0	173	75	25.0593	134	88	80	95	0.842105	80			63	31	46.4	4.65	100	439	2.51	4.66	1.11	2.52	77	44	6.03	179	5.24	54.6	367.52	14.53	16	742	3.00287
743	2	2015-8-24 10:57:21	1	41	0	0	0	0	24yrs, 20/day	Occasional	172	79	26.7036	102	65	88	99	0.888889	84	-1.745	-0.327	15	19	45.7	5.53	83	323	5.39	4.66	0.84	1.53	141	31	4.08	148	10.71	50.9	128.29	15.62	17	743	3.83905
744	2	2015-8-24 10:58:52	2	25	0	0	0	0	0	0	157	52	21.0962	110	66	69	88	0.784091	76			15	16	48.4	4.99	69	350	1.62	4.27	1.06	2.44	66	14	2.5	122	5.09	48.7	56.43	13.63	18	744	3.02283
745	2	2015-8-24 10:52:42	2	57	1	0	1	0	0	0	151	43	18.8588	116	60	67	85	0.788235	60	-0.321	1.131	19	31	44.3	4.74	61	324	0.48	5.16	2.3	2.57	63	13	2.02	128	4.23	54.6	140.09	7.74	19	745	1.63056
746	2	2015-8-24 10:39:05	2	26	0	0	0	0	0	0	157	53	21.5019	124	85	70	94	0.744681	84			9	18	51.1	5.4	54	305	1.94	3.79	0.98	2.1	67	9	2.99	141	7.09	69.3	29.65	17.81	20	746	4.2744
747	2	2015-8-24 8:32:17	2	15	0	0	0	0	0	0	158	46	18.4265	103	55	65	86	0.755814	82			11	16	42.8	4.23	57	279	1.07	3.83	1.59	1.67	144	9	1.32	149	8.3	62.2	7.72	9.92	21	747	1.86496
748	2	2015-8-24 10:57:46	1	31	0	0	0	0	13yrs, 20/day	often	167	73	26.1752	113	65	81	97	0.835052	62			38	31	46.1	4.52	90.6	396	0.87	4.15	1.47	2.19	88	20	2.04	164	6.44	58.3	242.38	13.12	22	748	2.63566
749	2	2015-8-24 10:58:42	1	56	0	0	0	0	31yrs, 6/day	Occasional	173	73	24.3911	129	78	90	94	0.957447	70			41	35	49.2	5.89	75	376	1.56	3.52	1.36	1.48	100	66	4.08	173	6.63	57.4	237.62	17.47	23	749	4.57326
750	2	2015-8-24 10:37:37	1	52	1	0	0	0	32yrs, 5/day	10yrs, 200-250g/day	164	65	24.1672	142	89	84	92	0.913043	76			21	22	49	5.6	86	647	1.58	6	1.23	3.77	51	57	3.58	163	9.49	71.4	587.72	18.67	24	750	4.64676
751	2	2015-8-24 10:02:57	2	51	0	0	0	0	0	0	155	56	23.3091	110	59	82	90	0.911111	64	0.488	1.572	25	19	46.1	5.34	45	307	0.62	4.25	1.91	1.92	49	38	3.28	127	6.05	65.4	20.87	15.65	25	751	3.71427
752	2	2015-8-24 10:55:49	1	55	1	0	0	0	30yrs, 10/day	250g/day	153	56	23.9224	129	74	79	83	0.951807	66	-1.272	0.58	40	43	48.7	9.95	77	296	1.99	4.03	1.42	1.81	127	85	5.62	155	6.45	66.9	154.29	10	26	752	4.42222
753	2	2015-8-24 8:27:59	2	50	1	0	1	0	0	0			#DIV/0!	139	85			#DIV/0!		0.007	1.034	30	34	47.1	5.3	73.5	199	1.29	4.42	1.81	2.09	84	74	3.74	137	5.45	51.7	29.13	16.54	27	753	3.89609
754	2	2015-8-24 11:00:46	1	50	1	0	1	0	20yrs, 30/day	Occasional	164	73	27.1416	119	76	83	95	0.873684	66			22	30	46.7	6.07	93	314	1.38	4.22	1.14	2.36	120	21	2.96	179	7.64	59.3	239.21	20.65	28	754	5.57091
755	2	2015-8-24 10:23:59	2	55	1	0	1	1	0	0	164	59	21.9363	103	66	75	93	0.806452	84			12	22	45.6	5.73	55.3	312	0.91	3.5	2.01	1.28	80	10	2.9	137	5.04	61.5	28.93	13.87	29	755	3.53223
756	2	2015-8-24 11:10:01	2	27	0	0	1	0	0	Occasional	160	52	20.3125	97	64	72	90	0.8	76	0.291	0.414	22	19	51.8	4.22	56	321	1.12	4.41	1.57	2.29	57	10	3.06	124	3.47	53.9	38.33	12.65	30	756	2.37258
757	2	2015-8-24 10:36:55	1	45	0	0	0	0	30yrs,20/day	Occasional	170	91	31.4879	122	84	105	107	0.981308	72	0.296	1.861	35	29	47.3	5.52	103	493	6.64	4.48	0.73	0.93	71	91	3.38	155	6.56	61.3	378.61	26.35	31	757	6.46453
758	2	2015-8-24 8:34:14	2	74	0	0	0	0	0	0	147	52	24.064	137	83	87	94	0.925532	80	-3.528	-0.913	12	21	44.1	4.81	48	312	1.28	5.11	1.75	2.73	78	25	2.01	122	3.19	51.4	73.49	14.48	32	758	3.0955
759	2	2015-8-24 11:04:04	1	36	0	0	1	0	0	Occasional	170	76	26.2976	124	79	84	102	0.823529	68			54	31	50	5.2	69	345	2.82	5.39	0.95	3.31	80	61	1.54	157	4.98	63.1	122.95	16.6	33	759	3.83644
760	2	2015-8-24 8:43:33	2	61	0	0	0	1	0	0	164	53	19.7055	103	59	73	89	0.820225	76			28	31	44.6	5.2	69.6	267	0.82	5.75	1.93	3.35	63	14	3.39	136	4.25	50.2	125.16	12.86	34	760	2.97209
761	2	2015-8-24 10:59:22	2	25	0	0	0	0	0	0			#DIV/0!					#DIV/0!				9	20	44.1	4.83	48.5	275	0.83	4.7	1.27	2.9	57	8	3.1	131	5.99	57.1	35.48	12.42	35	761	2.66616
762	2	2015-8-24 10:29:38	2	56	1	0	1	0	0	0	153	62	26.4855	130	55	83	91	0.912088	72	0.961	2.35	17	23	47.5	5.89	62	272	1.18	3.57	1.54	1.64	77	11	3.55	125	6.25	64.9	136.04	12.65	36	762	3.31149
763	2	2015-8-24 10:34:31	1	32	0	1	0	0	0	often	171	75	25.6489	123	77	84	95	0.884211	66			23	25	46.6	4.89	84.4	519	2.85	3.21	0.96	1.23	77	55	2.29	147	8.5	59.7	278.81	17.22	37	763	3.74248
764	2	2015-8-24 10:58:02	1	42	0	0	0	0	21yrs, 20/day	Occasional	160	66	25.7812	111	76	86	93	0.924731	68	0.03	1.487	34	22	43.7	4.66	74.3	345	1.75	3.97	1.34	1.94	126	27	10.42	169	7.47	75.2	293.07	12.52	38	764	2.59303
765	2	2015-8-24 9:28:36	2	25	0	1	1	0	0	0	151	50	21.9289	100	60	66	94	0.702128	80			12	22	44.3	4.77	9.3	265	1	4.93	1.85	2.47	62	9	2.02	133	6.27	53.9	41.71	11.59	39	765	2.45708
766	2	2015-8-24 8:49:19	2	34	1	0	1	0	0	0	159	50	19.7777	101	57	68	88	0.772727	72			28	22	45.9	5.4	72	398	1.11	4.99	1.33	2.91	51	15	3.23	98	5.38	50.1	1.99	11.96	40	766	2.8704
767	2	2015-8-24 8:16:43	2	60	0	0	0	0	0	0	159	60	23.7332	125	77	77	93	0.827957	72	-1.23	0.419	31	32	47.7	5.42	73	333	0.99	5.3	2.14	2.64	63	13	3.29	138	5.02	47.1	391.29	21.54	41	767	5.18875
768	2	2015-8-24 10:33:51	1	19		1	1		Occasional	Occasional	171	62	21.2031	114	74	69	90	0.766667				22	21	47.6	4.82	87.7	405	4.47	5.05	1.51	2.78	71	16	2.02	171	7.7	50.9	93.82	19.41	42	768	4.15805
769	2	2015-8-24 8:30:06	2	50	0	0	0	0	0	0	158	62	24.8358	106	61	78	97	0.804124	70	-1.375	-0.346	30	30	45.1	4.85	74.7	283	1.04	4.94	1.48	2.75	115	71	1.91	124	6.15	46.1	70.84	13.22	43	769	2.84964
770	2	2015-8-24 11:06:35	1	37	0	0	1	0	10yrs, 2-3/day	Occasional	171	65	22.2291	106	67	76	93	0.817204	66	0.309	1.554	37	24	49	4.93	94.9	440	2.03	5.72	1.78	3.19	63	29	3.73	157	7.07	63.9	359.6	11.78	44	770	2.58113
771	2	2015-8-24 9:45:11	2	60	0	0	1	0	0	0	159	55	21.7555	107	64	74	92	0.804348	58	0.992	2.641	32	33	47.6	5.2	72	273	1.33	6.13	1.74	3.64	85	11	3.34	131	3.35	41.7	66.1	14.13	45	771	3.2656
772	2	2015-8-24 9:10:47	2	31	0	0	0	0	0	0	162	52	19.8141	102	57	73	92	0.793478	82	1.122	1.342	13	14	45.8	5.02	43	306	0.49	4.82	1.62	2.72	62	18	1.02	131	6.81	55.3	77.6	14.71	46	772	3.28196
773	2	2015-8-24 8:18:38	2	33	0	0	0	0	0	0	167	51	18.2868	105	71	62	91	0.681319	78			12	19	45.4	4.9	62	242	0.83	4.58	1.89	2.17	65	10	5.81	131	4.43	60.5	70.84	12.07	47	773	2.62858
774	2	2015-8-24 9:09:10	1	52	0	0	1	0	0	0	177	65	20.7476	96	62	82	99	0.828283	70	-2.798	-1.022	21	31	46.1	4.59	92	328	0.86	4.54	1.64	2.39	74	14	4.09	147	4.83	67.5	384.95	13.68	48	774	2.79072
775	2	2015-8-24 8:38:45	2	34	0	0	0	0	0	0	156	49	20.1348	110	67	67	90	0.744444	64			17	24	45	4.52	57	261	0.78	4.82	2.05	2.41	41	4	1.53	130	7.42	60.2	19.39	9.8	49	775	1.96871
776	2	2015-8-24 9:49:36	2	33	0	0	1	0	0	0	158	59	23.634	101	71	74	93	0.795699	84	1.602	1.879	17	18	44.6	4.93	60.1	252	1.01	4.13	1.36	2.23	53	17	2.54	132	8.85	72.8	25.53	13.73	50	776	3.0084
777	2	2015-8-24 10:30:06	1	49	0	1	0	0	28yrs, 10/day	0	168	59	20.9042	101	67	72	89	0.808989	66			16	22	49.5	5.33	101	360	1.35	5.08	2.13	2.48	81	10	3.79	146	3.66	63.7	75.45	9.29	51	777	2.2007
778	2	2015-8-24 10:54:47	2	26	0	0	1	0	0	Occasional	164	50	18.5901	97	63	62	87	0.712644	66	3.273	3.375	15	19	45.5	5.22	59.8	296	0.64	5.07	1.65	2.94	52	9	2.07	126	6.06	50.1	44.61	12.51	52	778	2.90232
779	2	2015-8-24 11:06:27	1	55	1	0	1	0	26yrs, 20/day	Occasional	165	62	22.7732	128	79	75	90	0.833333	82			22	23	44.6	5.49	80.8	318	0.98	4.27	1.78	2.04	104	30	2.51	151	5.65	70.4	125.71	7.42	53	779	1.81048
780	2	2015-8-24 10:44:49	1	25	0	0	0	0	2yrs, 2/day	0	170	76	26.2976	142	87	81	99	0.818182	92			69	34	47.4	5.79	103	413	1.41	5.54	1.16	3.5	118	40	2.49	161	7.09	55.9	74.44	14.21	54	780	3.65671
781	2	2015-8-24 10:32:47	1	59	0	0	1	0	0	Occasional	171	60	20.5191	115	67	82	89	0.921348	68	-2.563	-0.621	58	66	44.9	4.77	72	333	1.12	4.91	1.33	2.92	88	12	4.75	166	4.64	51.8	381.78	18.76	55	781	3.97712
782	2	2015-8-24 8:14:50	2	56	1	1	1	0	0	0	157	69	27.993	161	86	94	106	0.886792	72			19	31	42.5	5.47	63.2	337	1.82	5.17	1.51	2.81	75	20	17.36	143	5.78	59.6	72.16	12.88	56	782	3.13127
783	2	2015-8-24 10:49:38	1	50	0	0	1	0	35yrs, 20/day	Occasional	162	66	25.1486	130	75	82	94	0.87234	66			35	29	44.1	5.05	104	412	2.55	6.27	1.35	3.74	89	23	3.43	159	7.3	61.8	150.41	14.47	57	783	3.24771
784	2	2015-8-24 9:26:13	2	34	1	1	1	0	0	0	161	68	26.2336	101	61	76	98	0.77551	78	2.253	2.561	20	23	49.8	4.88	52	285	1.26	4.62	1.22	2.77	91	14	2.63	140	5.25	59.3	19.43	18.63	58	784	4.04064
785	2	2015-8-24 10:32:24	1	63	0	0	1	0	0	Occasional	162	56	21.3382	135	73	69	87	0.793103	62	1.328	3.35	17	31	43.2	5.48	85.1	254	0.63	5.36	2.45	2.46	87	19	4.42	158	5.71	49.5	127.19	12.94	59	785	3.15161
786	2	2015-8-24 9:53:49	2	24	0	0	0	0	0	0	166	48	17.4191	90	62	65	84	0.77381	78			14	19	48.5	4.34	47	323	1.6	4.21	1.35	2.15	62	75	2.67	124	7.22	61.9	140.09	14.95	60	786	2.88369
787	2	2015-8-24 10:34:25	1	41	0	0	1	0	0	often	173	77	25.7276	128	87	82	96	0.854167	68			45	29	47.3	6.42	84.1	394	2.14	3.9	1.25	1.85	61	47	2.14	157	6.13	52.1	182.18	16.51	61	787	4.71085
788	2	2015-8-24 9:17:09	2	39	1	0	1	0	0	0	157	76	30.8329	110	71	95	110	0.863636	74			15	20	46.6	4.8	55	283	1.18	4.89	1.38	3.01	62	13	1.96	103	4.54	61.6	1.2	24.13	62	788	5.14773
789	2	2015-8-24 10:35:54	1	47	1	0	1	0	31yrs, 20/day	Occasional	170	74	25.6055	105	78	89	95	0.936842	78			27	19	45.3	4.74	80	378	3.46	8.05	1.46	4.7	65	33	6	157	7.95	65.5	537.03	12.05	63	789	2.53853
790	2	2015-8-24 8:18:11	2	51	0	0	0	0	0	0	161	54	20.8325	90	52	71	91	0.78022	68	1.183	2.267	13	69	44.4	5.08	73.6	355	0.68	4.47	2.39	1.92	68	11	2.34	138	5.55	58.5	74.69	12.04	64	790	2.71836
791	2	2015-8-24 8:51:27	2	35	0	0	0	0	0	0	154	47	19.8178	93	63	65	86	0.755814	82	-0.222	0.119	17	23	48.2	4.73	37	233	0.57	3.97	1.76	1.93	69	13	1.07	135	4.92	65.7	67.74	11.07	65	791	2.32716
792	2	2015-8-24 10:13:26	2	45	1	0	0	0	0	Occasional	155	48	19.9792	94	65	74	88	0.840909	70	1.81	2.57	11	17	44.6	4.88	65	208	0.98	4	1.95	1.76	64	12	3.06	120	5.11	50.1	13.06	11.55	66	792	2.50507
793	2	2015-8-24 11:00:35	1	60	0	0	0	0	23yrs, 4/day	Occasional	168	69	24.4473	103	77	80	91	0.879121	70	-1.323	0.64	23	27	45.6	5.2	99.7	383	1.72	5.13	1.26	3.03	128	17	3.08	158	5.58	61.5	58.77	12.6	67	793	2.912
794	2	2015-8-24 10:33:12	1	39	1	0	1	0	21yrs, 20/day	Occasional	172	72	24.3375	107	63	82	91	0.901099	70			9	19	47	11.06	72	292	2.15	5.15	0.78	3.33	84	17	2.61	184	7.59	61.8	345.35	9.76	68	794	4.79758
795	2	2015-8-24 10:34:10	1	59	1	1	0	0	34yrs, 20/day	0	162	56	21.3382	114	73	71	83	0.855422	74			45	34	46	5.24	94	251	1.12	5.59	1.33	3.45	98	29	2.88	152	7.13	68.3	145.44	12.09	69	795	2.81563
796	2	2015-8-24 9:25:33	1	52	0	0	1	0	0	Occasional	163	67	25.2174	112	80	90	95	0.947368	80	0.09	1.866	17	18	46.5	5.11	84	366	1.12	5.75	1.76	3.39	62	18	4.94	171	6.31	61.7	381.78	12.61	70	796	2.86387
797	2	2015-8-24 8:51:52	2	63	0	0	1	1	0	0	153	56	23.9224	111	69	78	96	0.8125	72	0.452	2.303	22	28	41.5	5.07	60.4	221	1.16	5.38	1.75	3.06	104	16	2.8	145	4.55	48.7	74	13.64	71	797	3.07355
798	2	2015-8-24 10:55:39	2	51	0	1	1	0	0	0	146	47	22.0492	119	80	69	87	0.793103	68			13	21	45.8	4.57	67	300	1.12	6.65	1.72	4.26	72	6	2.44	131	3.95	70.3	75.32	14.17	72	798	2.87808
799	2	2015-8-24 9:10:57	2	27	0	0	0	0	0	0	153	38	16.2331	104	67	55	80	0.6875	92			14	20	51.4	4.36	50	281	0.83	3.33	1.47	1.55	72	9	4.38	111	6.8	53.8	79.94	9.27	73	799	1.79632
800	2	2015-8-24 11:00:13	1	38	1	0	1	0	0	Occasional	171	73	24.9649	147	85	84	94	0.893617	76			25	29	46.7	5.45	95.8	439	2.09	3.86	0.82	2.15	111	17	1.48	164	7.15	57.3	305.74	14.19	74	800	3.43713
801	2	2015-8-25 9:46:07	2	29	0	0	1	0	0	0	169	65	22.7583	105	71	85	98	0.867347	68			11	19	49.7	5.05	51	337	1.3	4.62	1.13	2.85	77	9	10.27	136	7.04	58.2	141.75	16.1	75	801	3.61356
802	2	2015-8-25 10:51:13	2	24	0	0	0	0	0	0	156	47	19.313	98	67	65	90	0.722222	76			11	18	48.3	4.36	53	348	0.47	3.9	1.71	1.87	67	25	1.59	146	6.3	54	52.58	14.33	76	802	2.77684
803	2	2015-8-25 9:47:18	2	30	0	0	0	0	0	0	161	53	20.4467	128	72	76	89	0.853933	92			16	21	48.2	5.25	66	300	1.41	4.05	1.31	2.17	49	14	1.7	136	6.12	71.4	25.44	10.35	77	803	2.415
804	2	2015-8-25 8:13:07	1	55	0	0	0	0	0	0	166	68	24.677	112	83	86	91	0.945055	88			22	23	53.3	7.57	68	392	1.43	5.06	1.54	2.79	93	38	2.92	179	6.3	66	283.56	9.58	78	804	3.22314
805	2	2015-8-25 10:59:38	2	27	0	1	0	0	0	0	152	49	21.2084	107	58	65	87	0.747126	92			11	18	49.4	4.89	48	260	1.18	4.55	1.66	2.39	65	10	4.78	127	6.88	64.8	45.06	15.76	79	805	3.42517
806	2	2015-8-25 10:51:08	2	46	0	0	1	0	0	0	155	55	22.8928	101	62	77	94	0.819149	68			12	15	49.6	4.6	46	210	1.47	4.45	1.62	2.26	60	32	2.89	121	5.35	63.3	64.45	16.02	80	806	3.2752
807	2	2015-8-25 11:01:30	2	38	0	0	1	0	10yrs, 10/day	0	159	55	21.7555	95	61	72	93	0.774194	68	1.995	2.445	12	20	39.9	4.24	70.8	254	0.74	3.85	1.47	1.99	45	8	1.28	113	5.48	43.3	3.94	10.82	81	807	2.03897
808	2	2015-8-25 10:48:18	2	32	0	0	0	0	0	0	162	50	19.052	103	65	69	87	0.793103	68			20	22	48	5.06	65	271	1.18	3.5	1.41	1.58	49	18	2.38	116	3.48	51.7	54.72	8.88	82	808	1.99701
809	2	2015-8-25 9:48:40	1	29	0	0	0	0	7yrs, 8-10/day	Occasional	175	72	23.5102	117	77	83	95	0.873684	66			56	34	52.9	4.81	95	435	1.7	4.74	0.91	2.9	92	48	3.31	167	5.92	32.6	62.62	15.84	83	809	3.38624
810	2	2015-8-25 9:29:27	2	34	0	0	0	0	0	0	158	59	23.634	122	74	82	98	0.836735	84			25	23	48.9	5.54	48	354	1.53	5.72	1.5	3.37	51	21	3.98	149	9.25	69.5	78.17	12.25	84	810	3.01622
811	2	2015-8-25 8:55:36	1	39	0	0	1	0	Occasional	Occasional	172	68	22.9854	109	67	85	98	0.867347	68	-2.192	-0.857	31	30	49.5	5.04	89	424	1.35	5.68	1.54	3.44	71	37	3.54	161	5.33	54	288.91	14.38	85	811	3.22112
812	2	2015-8-25 11:02:24	1	35	0	0	0	0	10yrs, 2-3/day	Occasional	169	65	22.7583	111	72	80	95	0.842105	66			23	22	48.7	5.12	60	312	1.37	5.41	1.53	3.17	56	29	3.78	146	5.66	46.7	132.88	9.11	86	812	2.07303
813	2	2015-8-25 10:57:15	2	26	0	0	1	0	0	0	159	56	22.151	96	66	70	96	0.729167	68			37	30	49	4.9	61	261	1.5	4.33	1.52	2.28	69	17	1.59	132	6.83	51.5	57.7	16.11	87	813	3.5084
814	2	2015-8-25 11:00:01	2	28	0	0	1	0	0	0	157	45	18.2563	117	66	63	83	0.759036	70			21	22	48	4.46	60	215	0.38	5.6	2.44	2.88	83	33	3.69	147	6.29	59.4	55.79	8.31	88	814	1.64723
815	2	2015-8-25 11:03:31	2	26	0	0	1	0	0	0			#DIV/0!					#DIV/0!	88			18	18	50.4	5.45	51	284	2.84	5.82	1.09	3.45	21	16	4.05	131	7.85	57	53.31	12.82	89	815	3.10529
816	2	2015-8-25 9:17:59	1	55	0	0	1	0	24yrs, 20/day	Occasional	162	64	24.3865	132	79	86	94	0.914894	68	0.257	2.108	28	25	44.9	5.22	83	398	0.91	4.13	1.63	2.08	81	25	4.2	144	6.93	57.2	157.28	11.21	90	816	2.60072
817	2	2015-8-25 9:05:41	1	79	1				42yrs, 5/day		168	54	19.1327	162	75	72	86	0.837209	64	1.552	3.82	26	38	43.8	6.77	72	280	0.44	3.63	2.08	1.43	59	20	2.15	145	5.16	54.9	127.63	11.69	181	817	3.51739
818	2	2015-8-25 8:50:57	1	50	0	0	1	0	30yrs, 10/day	Occasional	165	67	24.6097	114	69	87	96	0.90625	72			46	40	45.6	4.89	86	240	0.67	3.52	1.24	1.8	94	17	2.92	150	6.5	42.4	96.43	5.27	182	818	1.14535
819	2	2015-8-25 9:26:15	2	24	0	0	0	0	0	0	158	56	22.4323	110	68	71	96	0.739583	78			8	15	49.6	4.96	49	319	0.62	4.85	1.83	2.53	34	11	2.1	140	6.53	60	40.06	7.76	183	819	1.71065
820	2	2015-8-25 8:35:57	1	37	0	0	0	0	10yrs, 10/day	often	168	64	22.6757	98	66	80	91	0.879121	65			33	27	44.8	4.95	114.3	384	10.8	6.32	0.77	2.17	74	83	5.55	172	7.08	68.3	251.12	10.84	184	820	2.3848
821	2	2015-8-25 9:25:52	1	52	1	1	0	0	10yrs, 10/day	Occasional	166	65	23.5883	125	77	85	95	0.894737	72	1.802	3.578	11	15	43.6	8.9	87	324	2.03	4.15	1.07	2.1	68	13	2.3	132	5.87	57.9	344.66	10.32	185	821	4.08213
822	2	2015-8-25 9:05:27	2	51	1	0	0	0	0	0	161	58	22.3757	110	69	81	97	0.835052	72	0.239	1.323	24	24	46.7	4.39	68	305	1.88	4.56	1.14	2.49	67	28	1.77	142	5.22	53.4	80.29	9.69	186	822	1.89063
823	2	2015-8-25 11:06:57	2	23	0	0	0	0	0	0	166	48	17.4191	115	70	64	88	0.727273	68			13	18	44.7	4.8	57.4	196	0.47	3.71	1.89	1.64	67	11	2.93	136	5.18	61.8	68.34	7.67	187	823	1.63627
824	2	2015-8-25 10:50:06	2	33	0	0	1	0	0	0	154	49	20.6612	94	65	69	85	0.811765	88			11	17	42.7	4.37	63.4	191	0.6	4.1	1.49	2.1	47	11	2.21	125	5.5	58.5	63.21	9.83	188	824	1.9092
825	2	2015-8-25 9:17:44	1	43	0	0	1	0	10yrs, 20/day	0	170	78	26.9896	130	93	89	99	0.89899	66			31	25	48.5	5.69	88	694	3.05	4.93	1.56	2.45	81	33	21.24	151	7.86	50.9	363.15	15.79	189	825	3.99312
826	2	2015-8-25 10:55:10	1	43	1	0	0	0	20yrs,10/day	Occasional	160	59	23.0469	114	75	79	87	0.908046	70	-1.158	0.337	74	50	50.5	4.74	110	483	4.72	6.46	1.17	2.96	70	58	6.47	176	6.58	52.7	440.34	13.24	190	826	2.78923
827	2	2015-8-25 9:10:15	2	40	0	0	0	0	0	0	159	53	20.9644	97	61	69	92	0.75	72			7	13	27.8	4.51	61.4	235	0.54	4.04	1.53	2.06	49	9	1.21	129	4.33	48.9	30.6	10.12	191	827	2.0285
828	2	2015-8-25 10:51:24	2	34	0	0	0	0	0	0	155	51	21.2279	106	57	71	91	0.78022	68	1.965	2.273	27	24	49.3	5.34	44	201	0.66	4.26	2.25	1.74	49	27	2.79	126	2.95	43.4	29.47	5.24	192	828	1.24363
829	2	2015-8-25 10:46:17	2	49	1	0	0	0	0	0	159	52	20.5688	136	86	76	90	0.844444	80			85	59	34	5.47	65	253	0.86	4	1.49	2.12	84	16	1.57	135	6.53	61.2	111.11	9.64	193	829	2.34359
830	2	2015-8-25 11:00:08	2	29	0	0	0	0	Occasional	Occasional	162	58	22.1003	96	50	70	92	0.76087	72			8	13	48.1	4.24	56	302	0.7	5.08	2.04	2.57	58	8	1.66	132	7.79	63.9	85.05	12.62	194	830	2.37817
831	2	2015-8-25 9:05:37	1	57									#DIV/0!	132	77			#DIV/0!		1.525	3.423	26	27	45.6	5.25	84	423	1.2	3.19	0.93	1.59	122	42	3.3	163	5.67	64	311.69	14.07	195	831	3.283
832	2	2015-8-25 10:05:14	1	57	0	0	0	0	30yrs, 10/day	Occasional	163	73	27.4756	150	84	93	99	0.939394	68			41	33	53.1	5.75	66	394	2.19	5.41	1.08	3.25	151	101	5.63	174	6	57.9	169.65	9.34	196	832	2.38689
833	2	2015-8-25 10:47:46	1	41	0	0	1	0	Occasional	Occasional	163	56	21.0772	122	81	77	87	0.885057	64			24	21	49.8	4.99	90	418	0.57	4.25	1.42	2.32	87	52	3.71	157	6.85	71.1	307.4	11.22	197	833	2.48835
834	2	2015-8-25 8:58:16	2	47	0	0	0	1	0	0	161	61	23.533	102	60	77	97	0.793814	68	2.01	2.872	25	29	41.7	4.67	55	209	0.4	4.1	1.87	2.03	51	10	2.57	130	6.98	72.6	35.68	9.53	198	834	1.978
835	2	2015-8-25 10:46:03	2	40							162	52	19.8141	99	58	71	80	0.8875		-0.35	0.496	22	24	45.6	5.31	56	221	1.75	6.04	1.17	3.85	66	31	1.42	158	5.42	51.3	91.96	13.35	199	835	3.1506
836	2	2015-8-25 10:54:22	1	51	0	0	0	0	0	0	166	71	25.7657	130	84	90	91	0.989011	68	0.683	2.432	30	26	43.9	4.06	84.5	334	1.3	4.37	1.04	2.66	74	21	4.44	170	5.79	66.3	184.39	11.85	200	836	2.13827
837	2	2015-8-25 9:10:32	1	41	1	0	0	0	20yrs, 10/day	Occasional	168	75	26.5731	114	79	90	98	0.918367	70			34	22	48.5	4.8	78	351	1.96	4.44	1.25	2.4	59	24	4.22	153	8.82	52	155.92	12.79	201	837	2.72853
838	2	2015-8-25 10:14:03	2	27	0	0	1	0	10yrs, 10/day	Occasional	153	43	18.369	108	71	61	84	0.72619	69			8	14	49.5	4.88	44	207	0.99	4.77	1.78	2.46	60	10	2.71	112	6.06	67.3	41.25	8.9	202	838	1.93031
839	2	2015-8-25 9:50:26	1	33	0	0	1	0	12yrs, 20/day	often	172	56	18.9292	118	76	70	88	0.795455	68			10	17	48.7	4.53	84	325	1.04	5.49	1.76	3.18	62	8	1.68	159	6.28	65.9	54.05	6.3	203	839	1.2684
840	2	2015-8-25 10:54:31	1	42	0	0	1	0	10yrs, 20/day	Occasional	162	60	22.8624	106	71	77	90	0.855556	69	0.353	1.81	28	25	46.4	4.78	77.5	395	0.69	3.79	1.62	1.86	80	15	2.83	131	4.64	59.5	159.32	8.51	204	840	1.8079
841	2	2015-8-25 9:22:25	1	49	0	1	1	1	Occasional	Occasional	174	86	28.4053	132	85	98	105	0.933333	60	-1.427	0.265	24	19	43.1	4.82	77	386	0.94	4.29	1.36	2.39	53	43	4.24	156	4.87	63.5	347.07	10.41	205	841	2.23005
842	2	2015-8-25 10:56:31	2	33	0	0	0	0	0	0			#DIV/0!	99	63			#DIV/0!	74	0.823	1.1	13	16	44.6	4.82	50.1	283	0.64	3.56	1.56	1.67	44	13	4.05	128	5.93	66	28.79	12.47	206	842	2.67135
843	2	2015-8-25 10:55:22	2	28	0	0	0	0	0	0			#DIV/0!	110	80			#DIV/0!	80			19	21	48.9	4.65	48	372	1.81	4.9	1.27	2.79	61	25	2.02	146	8.96	63.8	98.18	12.89	207	843	2.66393
844	2	2015-8-25 8:24:10	1	54						Occasional	165	67	24.6097	112	77	86	95	0.905263				27	31	51.5	5.33	71	418	1.49	5.25	1.35	3.1	73	42	3.47	166	8.15	61.5	229.15	9.74	208	844	2.3073
845	2	2015-8-25 11:03:29	1	36	0	0	1	1	0	0	173	73	24.3911	115	75	84	99	0.848485	60			12	22	46.8	4.47	87	317	1.3	4.24	1.35	2.33	64	29	1.95	148	8.4	60.7	294.27	11.48	209	845	2.28069
846	2	2015-8-25 10:07:49	2	27	0	0	1	0	0	0	155	45	18.7305	105	56	63	83	0.759036	80			12	18	46.7	4.71	50.7	264	0.63	4.05	2.25	1.58	73	10	1.61	122	6.11	65.1	97.21	13.52	210	846	2.83019
847	2	2015-8-25 11:02:40	2	37	0	0	0	0	0	0	153	59	25.204	125	83	76	97	0.783505	68			12	16	47.9	4.11	59	273	0.96	3.47	1.31	1.75	69	12	2.91	133	6.69	57.9	88.85	15.83	211	847	2.89161
848	2	2015-8-25 9:29:00	1	44	1	0	1	0	0	often	165	64	23.5078	128	81	88	93	0.946237	66	0.373	1.904	44	39	46	5.16	106	319	3.43	6.03	1.58	3.1	70	81	3.02	157	5.97	62	290.52	12.22	212	848	2.80245
849	2	2015-8-25 9:42:30	1	41					20yrs, 20/day	Occasional	162	73	27.8159	179	106	93	98	0.94898		-1.292	0.126	39	31	50.4	5.24	77	484	1.45	4.97	1.33	2.95	97	91	1.78	156	7.21	58.2	112.27	8.36	213	849	1.94695
850	2	2015-8-25 8:36:27	1	41	0	0	1	0	0	0	169	66	23.1084	110	65	80	93	0.860215	55	0.137	1.555	15	19	46	5.33	96	315	1.18	4.22	1.2	2.33	62	16	3.2	147	4.87	55.5	333.67	13.24	214	850	3.13641
851	2	2015-8-25 9:31:22	2	31	0	0	1	0	0	0	158	55	22.0317	106	67	73	97	0.752577	80			10	18	49.1	4.95	66	271	0.77	4.59	1.85	2.38	55	11	4.95	142	5.64	59.4	29.25	9.92	215	851	2.1824
852	2	2015-8-25 10:50:31	2	43	0	0	0	0	0	0	163	56	21.0772	88	65	67	92	0.728261	74			21	24	50.2	5.05	57	320	2.47	5.51	0.88	3.52	61	20	3	149	8.59	73.2	85.05	14.58	216	852	3.2724
853	2	2015-8-25 10:48:31	2	30	0	0	0	0	0	0	164	57	21.1927	113	71	72	94	0.765957	66			8	17	47.8	4.76	59.4	296	0.57	3.52	1.54	1.67	62	17	4.11	128	7.69	77.7	32	12.11	217	853	2.56194
854	2	2015-8-25 10:47:11	2	49	0	0	1	0	0	0	152	47	20.3428	103	64	65	86	0.755814	68			40	43	52.6	4.95	53	268	1.36	6.19	1.94	3.38	68	19	5.3	134	4.75	55.7	118.1	9.92	218	854	2.1824
855	2	2015-8-25 10:39:58	2	50	1	0	0	0	0	0	151	64	28.0689	131	76	87	95	0.915789	72	2.639	3.666	11	19	41.8	4.22	61	377	3.81	4.77	1.12	1.89	54	9	1.98	126	6.81	57.5	18.67	11.02	219	855	2.06686
856	2	2015-8-25 9:00:42	1	41			1			often	160	73	28.5156	130	84	93	96	0.96875				20	31	46.4	6.42	75	306	1.06	4.55	1.64	2.44	80	21	2.85	142	4.76	61.8	53.97	12.56	220	856	3.58379
857	2	2015-8-25 8:52:44	1	46	0	0	1	0	27yrs, 20/day	0	175	73	23.8367	112	73	81	98	0.826531	76			25	23	47.1	4.82	80	251	1.42	4.84	1.39	2.84	96	12	0.62	160	4.01	45.7	297.22	11.02	221	857	2.36073
858	2	2015-8-25 10:40:54	2	34	0	0	1	0	0	0	153	45	19.2234	134	74	66	84	0.785714	74	0.939	1.248	22	24	47.5	5.21	57	293	0.94	4.02	1.62	2.03	69	17	1.84	132	5.46	64.5	20.29	6.48	222	858	1.50048
859	2	2015-8-25 11:08:30	2	45	0	0	1	0	0	0	146	41	19.2344	102	57	69	84	0.821429	68			26	28	47.3	5.64	58	248	1.5	5.19	1.78	2.73	88	22	3.05	124	9.39	51.2	63.7	8.16	223	859	2.04544
860	2	2015-8-25 10:44:51	2	29	0	0	1	0	0	0	149	53	23.8728	116	74	72	93	0.774194	68			20	17	24.5	4.92	56	235	1.05	3.66	1.21	1.87	84	31	2.21	137	8.68	55.1	68.17	10.07	224	860	2.20197
861	2	2015-8-25 8:32:53	1	38	1	1	0	0	15yrs, 20/day	0	161	63	24.3046	114	62	85	89	0.955056	76	-1.417	-0.126	21	21	47.1	4.61	79	369	1.82	5.67	0.96	3.72	70	27	1.38	144	5.2	35.7	411.93	10.68	225	861	2.18821
862	2	2015-8-25 9:13:30	1	41	0	0	0	0	0	0	155	60	24.974	138	87	79	89	0.88764	80			21	21	48.9	4.8	79	319	1.15	5.17	1.69	2.83	63	18	3.38	160	4.6	46.5	192.7	8.7	226	862	1.856
863	2	2015-8-25 8:37:18	1	40	0	0	1	0	0	Occasional	174	73	24.1115	116	83	90	98	0.918367	65	-0.266	1.111	13	23	48.1	5.19	83	272	1.95	4.82	1.11	2.68	79	14	2.58	183	7.13	66.3	79.91	11.46	227	863	2.64344
864	2	2015-8-25 11:02:48	2	42	0	0	1	1	0	0	153	53	22.6409	112	69	68	94	0.723404	68			15	27	51.8	4.87	61	267	1.1	6.05	1.76	3.6	64	8	2.28	134	3.57	54.6	35.12	7.61	228	864	1.64714
865	2	2015-8-25 10:50:47	2	71	0	0	0	0	0	0	145	39	18.5493	119	76	65	83	0.783133	72	-1.774	0.632	14	22	47.4	6.12	46	171	0.92	5.81	2.04	3.22	74	34	4.78	120	9.31	55.3	333.94	11.64	229	865	3.16608
866	2	2015-8-25 10:51:51	2	41	0	0	1	0	0	0	156	58	23.833	91	53	78	93	0.83871	82			28	24	44	5.29	57	284	0.93	4.54	1.53	2.51	87	20	2.8	145	8.06	67.3	138.42	10.51	230	866	2.47102
867	2	2015-8-25 10:41:40	2	48	0	0	1	0	0	0	164	57	21.1927	93	60	74	93	0.795699	62	-0.179	0.737	27	26	45.4	5.12	81	386	1.07	5.07	1.41	3	65	16	5.86	137	6.46	60.2	72.2	7.47	231	867	1.69984
868	2	2015-8-25 11:05:45	1	34	0	0	0	0	Occasional	Occasional	170	74	25.6055	115	73	84	98	0.857143	70			33	28	46	4.85	85.5	368	0.97	3.64	1.09	1.97	98	18	3.77	172	7.74	55.1	200.47	9.53	232	868	2.05424
869	2	2015-8-25 11:07:06	2	41	0	0	0	0	0	0	158	48	19.2277	81	51	68	87	0.781609	66			14	21	45.8	5.1	51.2	223	0.59	5.29	2.57	2.46	67	13	10.87	125	5.82	53.2	42.48	10.05	233	869	2.278
870	2	2015-8-25 8:53:09	1	54	1	0	0	0	30yrs, 10/day	Occasional	161	73	28.1625	133	83	98	97	1.01031	80			30	28	46.6	5.04	67	343	1.44	4.1	0.98	2.28	68	23	3.01	153	5.21	72.3	217.35	8.56	234	870	1.91744
871	2	2015-8-25 9:37:52	1	34	1	0	1	0	0	0	160	47	18.3594	109	72	66	85	0.776471	68			11	20	47.8	3.67	95	343	0.83	3.84	1.45	1.99	88	11	2.79	164	5.2	59.7	115.77	8.28	235	871	1.35056
872	2	2015-8-25 11:04:30	1	35	0	0	0	0	11yrs, 10/day	Occasional	166	73	26.4915	109	65	79	96	0.822917	70			29	19	48.5	5.24	84	384	1.9	5	1.61	2.69	74	24	6.44	175	6.71	60.6	234.51	9.63	236	872	2.24272
873	2	2015-8-25 10:42:15	2	56	0	0	1	0	0	0	163	53	19.9481	110	62	72	93	0.774194	60	-0.403	0.986	8	21	46.5	4.14	64	222	0.83	3.97	1.79	1.79	82	12	2.21	121	4.68	45.9	223.25	8.04	237	873	1.47936
874	2	2015-8-25 10:41:03	2	34	1	0	1	0	0	0	154	47	19.8178	103	64	65	86	0.755814	82			22	24	43.1	4.77	62	262	1.01	4	1.8	1.78	62	11	0.79	124	6.29	66.3	8.38	15.73	238	874	3.33476
875	2	2015-8-25 8:18:55	1	48	1	0	0	0	0	often	173	72	24.0569	116	86	87	94	0.925532	60	0.377	2.04	24	24	51.7	5.25	110	494	2.27	5.6	1.62	3.03	62	26	2.68	177	5.57	57	142.21	12.56	239	875	2.93067
876	2	2015-8-25 8:30:49	2	51	0	1	0	0	0	0	152	54	23.3726	116	77	76	91	0.835165	86	1.411	2.495	4	18	42.3	4.93	62	223	1.18	5.18	1.69	2.87	61	14	1.53	126	7.5	61.9	136.48	8	240	876	1.75289
877	2	2015-8-25 11:00:39	2	22	0	0	0	0	0	0	159	54	21.3599	110	58	68	92	0.73913	76			11	18	47.1	4.15	57	264	1.15	3.84	1.76	1.66	60	8	3.7	128	7.58	60.3	78.69	12.5	241	877	2.30556
878	2	2015-8-25 10:40:26	2	28	0	0	1	1	0	0	160	64	25	106	57	79	100	0.79	70			31	21	45.5	5.27	62	282	0.78	4.09	1.87	1.74	81	73	3.08	136	8.22	55.3	22.69	17.63	242	878	4.12934
879	2	2015-8-25 10:48:47	2	29	0	0	0	0	0	0	153	53	22.6409	113	70	74	94	0.787234	82	0.706	0.874	16	21	43.2	4.8	49	252	1.2	3.57	1.32	1.76	47	22	1.58	104	6.49	59.5	10.76	14.29	243	879	3.04853
880	2	2015-8-25 9:29:08	1	39	0	0	1	0	0	often	169	61	21.3578	111	81	73	92	0.793478	64			13	22	48.8	4.81	75	421	0.86	5.34	2.17	2.73	79	23	3.67	160	4.53	62.5	148.53	11.62	244	880	2.4841
881	2	2015-8-25 9:27:54	2	33	0	0	1	0	10yrs, 10/day	Occasional	162	46	17.5278	113	82	66	83	0.795181	68			10	18	51.3	5.04	66	251	0.76	4.91	1.79	2.69	45	9	2.37	139	6.11	66.8	65.32	10.89	245	881	2.43936
882	2	2015-8-25 10:54:06	1	49	0	0	0	0	0	0	164	77	28.6288	129	74	92	98	0.938776				40	28	46.7	4.99	84	356	1.15	5.06	1.2	3.2	101	33	1.98	169	6.38	62.6	118.01	11.03	246	882	2.44621
883	2	2015-8-25 8:23:00	2	46	0	0	1	0	0	0	156	54	22.1893	83	61	73	94	0.776596	66	1.354	2.165	10	16	42	4.1	69.3	257	0.8	4.84	1.75	2.65	110	8	2.52	125	5.8	63.5	23.08	11.47	247	883	2.09009
884	2	2015-8-25 11:08:46	2	40	0	0	1	0	0	0	156	49	20.1348	113	79	65	86	0.755814	76			9	16	47.7	4.59	62	255	1.11	4.58	1.9	2.17	52	14	1.6	143	7.45	73.5	32.24	9.58	248	884	1.95432
885	2	2015-8-27 9:30:21	2	35	0	0	0	0	0	0	154	64	26.986	114	85	83	100	0.83	60			16	24	49.4	5.1	44	347	4.49	4.84	0.95	2.42	65	24	2.91	132	5.48	52.6	155.92	13.58	249	885	3.07813
886	2	2015-8-27 10:25:45	2	32	0	0	0	0	0	0	167	58	20.7967	103	67	70	95	0.736842	72			11	16	47.9	4.47	60	229	0.93	4.66	1.84	2.44	65	8	3.47	133	5.89	51.2	25	13.62	250	886	2.70584
887	2	2015-8-27 10:38:54	2	31	0	0	0	0	0	0	147	44	20.3619	92	63	66	84	0.785714	78			19	20	48.8	5.77	46	300	2.15	4.6	1.29	2.52	66	28	3.27	139	6.67	60.5	50.84	9.73	251	887	2.4952
888	2	2015-8-27 10:04:23	2	25	0	0	0	0	0	0	168	55	19.487	112	75	63	90	0.7	60	3.152	3.235	9	15	41.5	4.75	72.9	220	0.56	3.68	1.52	1.76	49	12	1.56	130	6.65	64	25.61	14.45	252	888	3.05056
889	2	2015-8-27 10:17:39	1	41	0	0	1	0	0	Occasional	164	56	20.8209	117	76	73	88	0.829545	70			13	17	40.9	4.73	91	310	1.44	4.02	1.22	2.12	52	10	3.39	159	6.02	52.2	318.12	8.65	253	889	1.81842
890	2	2015-8-27 8:25:17	2	40	0	0	1	0	0	0	162	47	17.9089	158	106	62	86	0.72093	90			9	20	46.4	4.55	81	249	1.34	4.81	1.75	2.6	69	13	2.11	127	6.81	56.3	25.94	9.04	254	890	1.82809
891	2	2015-8-27 10:12:12	2	51	0	0	1	0	0	0	148	48	21.9138	111	77	71	88	0.806818	72			16	23	47.5	4.31	55	281	0.99	5.03	1.62	2.94	67	40	3.18	137	4.25	65.5	39.46	5.53	255	891	1.0593
892	2	2015-8-27 10:47:01	1	37	0	0	1	0	9yrs, 20/day	Occasional	172	62	20.9573	99	70	83	95	0.873684	72			24	22	48	4.8	85	300	1.25	6.34	2.53	3.23	64	22	2.18	164	7.81	58.2	172.33	9.18	256	892	1.9584
893	2	2015-8-27 8:31:45	2	38	0	0	0	0	0	Occasional	160	57	22.2656	99	64	68	94	0.723404	72			9	21	45	5.27	63.6	249	0.47	4.31	2.11	1.98	66	13	4.62	116	6	50.2	40.65	9.75	257	893	2.28367
894	2	2015-8-27 10:40:47	2	25	0	0	0	0	0	0	155	43	17.898	121	90	64	84	0.761905	76			8	17	41.6	4.36	59.4	260	1.39	5.02	2.18	2.15	69	8	6.4	136	11.18	74	35.81	9.63	258	894	1.86608
895	2	2015-8-27 10:34:30	2	51	0	0	0	0	0	0	153	55	23.4952	124	79	72	91	0.791209	72			9	17	43.6	5.06	63.7	239	0.57	3.86	1.59	1.86	66	11	3.62	125	4.85	56.7	69.16	8.08	259	895	1.8171
896	2	2015-8-27 9:09:31	2	48	0	0	1	0	0	0	151	45	19.736	115	77	65	84	0.77381	72			19	25	48.9	6.62	50	253	1.56	6.53	1.93	3.92	84	24	3.8	149	3.59	42	252.46	11.18	260	896	3.2894
897	2	2015-8-27 9:16:23	2	62	0	0	1	0	0	0	156	57	23.4221	121	82	81	93	0.870968	78			83	56	39.7	5.75	50.3	237	1.24	5.72	1.98	3.02	97	85	2.53	122	5.39	64.8	169.38	6.24	261	897	1.59467
898	2	2015-8-27 10:36:29	1	25	1	1	1	0	11yrs,10/day	Occasional	160	60	23.4375	123	87	76	90	0.844444	76			30	23	47.3	4.26	91	552	1.86	5.29	1.37	3.16	82	29	1.02	168	7.13	43.2	384.59	4.53	262	898	0.85768
899	2	2015-8-27 10:18:26	2	40	0	0	0	0	0	Occasional	154	46	19.3962	96	64	65	85	0.764706	72	2.531	3.061	14	21	47.2	4	67	237	1.06	4.36	1.87	2.18	49	7	1.88	135	6.06	63.5	36.34	8.94	263	899	1.58933
900	2	2015-8-27 10:38:36	2	39	0	0	0	0	0	0	153	56	23.9224	106	69	77	98	0.785714	75			23	27	44.3	5.24	56	172	1.44	5.39	1.98	2.82	54	13	4.65	128	8.42	67	50.01	12.84	264	900	2.99029
901	2	2015-8-27 10:00:57	2	45	0	0	0	0	0	0	153	47	20.0777	105	77	66	85	0.776471	75			11	21	46.7	4.999	64	248	0.76	4.31	1.36	2.5	54	10	4.49	141	6.51	65.6	53.05	10.41	265	901	2.31287
902	2	2015-8-27 10:21:16	1	28	0	0	0	0	0	Occasional	166	73	26.4915	117	80	80	94	0.851064	75			29	25	47.7	5.31	85.2	387	1.09	4.85	1.37	2.83	101	37	2.26	157	4.78	50.7	281.13	12.39	266	902	2.92404
903	2	2015-8-27 10:19:54	1	34	0	0	0	0	0	0			#DIV/0!					#DIV/0!				14	21	49.5	4.42	84.5	367	0.81	4.15	1.31	2.38	76	18	7.19	165	5.59	56.5	160	9.17	267	903	1.8014
904	2	2015-8-27 9:11:05	2	38	0	0	0	0	0	0	156	53	21.7784	106	64	70	93	0.752688	66			14	24	48.7	4.63	57	328	0.97	4.999	1.8	2.66	50	15	2.3	132	5.79	68.2	67.07	15.17	268	904	3.12165
905	2	2015-8-27 10:25:54	2	49	0	0	1	0	0	0	150	40	17.7778	109	73	61	81	0.753086	84			11	19	50.8	7.01	45	235	1.61	5.48	1.46	3.28	66	21	2.59	123	5.48	54	13.87	8.89	269	905	2.76973
906	2	2015-8-27 9:01:37	2	69	0	0	0	0	0	0	164	58	21.5645	144	60	83	93	0.892473		-1.739	0.529	26	19	47.1	6.78	68	322	0.82	5.79	2.41	3.01	110	8	2.46	139	4.72	53.9	157.73	11.14	270	906	3.35685
907	2	2015-8-27 10:17:25	1	43	0	0	0	0	0	Occasional	173	72	24.0569	135	80	79	95	0.831579	60			62	49	44.8	4.72	95.8	318	0.57	5.02	2.52	2.31	64	16	4.28	163	3.39	57.8	225.1	6.07	361	907	1.27335
908	2	2015-8-27 8:22:29	2	46	0	0	1	0	0	Occasional	157	45	18.2563	115	72	66	84	0.785714	60	0.245	1.056	15	22	46	4.35	69	236	1.81	4.9	1.98	2.34	45	6	3.76	139	5.6	55.9	56.85	8.72	362	908	1.68587
909	2	2015-8-27 9:52:08	2	48	0	0	1	0	0	0	153	63	26.9127	135	87	81	96	0.84375	78			18	20	43.1	4.59	73.9	321	1.9	6.29	4	1.11	90	14	2.3	139	6.12	48.8	151.58	6.13	363	909	1.25052
910	2	2015-8-27 9:45:40	2	37	0	0	0	0	0	0	158	55	22.0317	103	70	78	86	0.906977	66	1.173	1.585	13	19	45.5	4.29	69	381	1.87	4.15	1.5	1.95	39	13	3.38	145	10.03	57.6	62.8	10.63	364	910	2.02679
911	2	2015-8-27 10:24:40	2	32	0	0	0	0	0	0	156	48	19.7239	107	66	65	84	0.77381	72			15	17	47.8	4.82	70	388	0.75	4.53	1.99	2.14	73	12	2.08	143	6.98	68.1	33.71	10.98	365	911	2.35216
912	2	2015-8-27 10:47:32	1	30	1	0	0	0	11yrs, 5/day	often	177	82	26.1738	137	85	83	103	0.805825	78			39	41	45.3	5.27	125.1	583	2.64	4.54	0.98	2.41	68	59	2.08	161	9.2	43.6	269.8	26.45	366	912	6.19518
913	2	2015-8-27 9:47:08	1	25	0	0	1	0	8-9yrs, 10/day	Occasional	173	63	21.0498	133	74	72	94	0.765957	86	0.912	1.398	21	23	48.6	5.42	88	457.9	1.6	4.37	1.27	2.5	95	17	3.86	178	6.92	60.5	163.24	12.97	367	913	3.12433
914	2	2015-8-27 10:24:51	2	34	0	0	0	0	0	0	165	55	20.202	92	60	68	90	0.755556	60	1.506	1.814	17	22	48.1	4.73	66.6	297	0.5	4.78	2.14	2.43	63	29	5.79	139	5.21	61.4	52.93	7.88	368	914	1.65655
915	2	2015-8-27 10:47:22	1	40	1	0	0	0	21yrs, 20/day	Occasional	167	71	25.4581	137	95	89	93	0.956989	76			23	22	46.6	5.8	80	287	2.15	3.8	1.16	1.86	76	80	3.3	159	7.43	62.8	183	8.86	369	915	2.28391
916	2	2015-8-27 10:19:35	1	38	0	0	0	0	0	Occasional	169	72	25.2092	121	68	79	98	0.806122	74	3.545	4.835	21	22	44.3	5.02	102	373	0.83	3.81	1.57	1.94	69	15	3.59	158	6.22	55.4	122.74	8.96	370	916	1.99908
917	2	2015-8-27 8:34:10	2	39	0	0	1	0	0	0	154	50	21.0828	102	73	70	88	0.795455	66	0.562	1.051	27	19	44.5	5.28	52.7	216	0.7	2.96	1.56	1.14	44	8	2.85	138	5.84	55.5	36.62	10.88	371	917	2.55317
918	2	2015-8-27 10:24:19	2	43	0	0	0	1	0	0	151	48	21.0517	123	78	74	96	0.770833	78	-0.345	0.318	9	16	46.7	5.08	61.9	209	0.62	3.75	1.66	1.87	50	8	7.17	139	6.83	56.6	39.32	5.57	372	918	1.25758
919	2	2015-8-27 10:47:50	1	35	0	0	1	0	Occasional	Occasional	169	71	24.8591	144	89	87	99	0.878788	78			24	19	47.6	5.4	96	404	3.23	5.28	1.37	2.68	66	30	2.34	168	8.41	34.3	36.88	10.86	373	919	2.6064
920	2	2015-8-27 9:03:56	2	33	0	0	0	0	0	Occasional	152	45	19.4771	103	60	65	87	0.747126	72			14	18	45.2	4.61	59	266	1.15	5.73	1.51	3.56	84	7	1.83	131	5.33	49.7	55.87	5.7	374	920	1.16787
921	2	2015-8-27 8:25:07	1	41	0	0	1	0	21yrs, 20/day	Occasional			#DIV/0!	109	74			#DIV/0!	70			17	24	48.4	4.74	56	360	0.92	3.48	1.45	1.6	94	41	3.85	176	8.39	70.1	239.03	7.07	375	921	1.48941
922	2	2015-8-27 10:25:37	2	38	0	0	0	0	0	0	151	49	21.4903	96	60	68	86	0.790698	84			27	23	43.7	5.59	56.2	336	1.09	4.13	1.38	2.21	103	20	2.86	137	7.73	74.3	108.18	9.76	376	922	2.42482
923	2	2015-8-27 10:11:50	1	60	0	1	0	0	0	Occasional	164	63	23.4236	109	76	83	93	0.892473	78	5.344	7.408	21	20	47.8	4.1	96	311	2.73	6.28	1.62	3.38	71	14	3.32	168	4.91	64.4	316.11	11.96	377	923	2.17938
924	2	2015-8-27 9:44:55	2	35	0	0	1	0	0	0	151	51	22.3674	95	60	70	94	0.744681	84			11	18	47.9	5.58	43	262	0.53	3.74	1.95	1.6	47	9	5.43	135	6.15	61.6	265.26	8.75	378	924	2.17
925	2	2015-8-27 9:32:44	2	51	0	0	0	0	0	0	158	65	26.0375	106	72	76	105	0.72381	84			17	18	45.7	5.03	66	288	1.12	5.02	1.97	2.56	133	26	1.4	127	3.52	49.1	148.37	7.56	379	925	1.69008
926	2	2015-8-27 9:59:10	2	46	0	0	1	0	0	0	156	48	19.7239	108	58	64	89	0.719101	60			8	21	47.4	4.97	64	305	0.52	4.5	2.42	1.97	81	15	1.27	141	7.56	67.6	48.42	9.31	380	926	2.05648
927	2	2015-8-27 10:35:27	2	53	0	0	1	0	0	0	164	71	26.398	110	80	83	98	0.846939	72	1.038	2.241	33	27	47.4	5.63	82	334	3.08	4.33	1.17	1.93	87	39	2.15	147	5.64	62.8	123.22	13.21	381	927	3.30544
928	2	2015-8-27 10:43:34	1	39	0	0	0	0	8yrs, 10/day	0	168	62	21.9671	108	73	81	92	0.880435	75			33	21	49.8	5.17	67	345	1.43	6.98	1.98	4.22	67	75	4.19	148	4.84	68.4	232.87	4.77	382	928	1.09604
929	2	2015-8-27 10:24:07	2	45	0	0	0	0	0	0	154	51	21.5045	127	81	70	92	0.76087	72			9	15	42.2	5.18	49.3	209	0.74	3.67	1.43	1.9	65	10	2.94	119	5.44	79.1	13.92	7.78	383	929	1.79113
930	2	2015-8-27 8:13:48	1	29	0	0	0	0	0	Occasional	179	88	27.4648	127	78	85	107	0.794393	78			22	21	49	5.22	89.8	400	3	4.78	0.94	2.5	56	12	2.6	170	9.07	70.9	67.86	11.21	384	930	2.60072
931	2	2015-8-27 10:34:46	2	48	0	0	0	0	0	0	149	44	19.8189	123	76	64	86	0.744186	96			17	26	44.7	5.25	62.1	303	0.86	5.62	2.15	2.99	84	14	3.38	115	8.86	75.5	9.87	5.83	385	931	1.36033
932	2	2015-8-27 10:24:54	1	29	0	0	1	0	0	0	180	74	22.8395	122	67	79	96	0.822917	78			76	51	48.9	4.39	87	416	0.74	4.05	2.01	1.8	73	137	5.31	145	5.42	48.4	304.78	5.52	386	932	1.07701
933	2	2015-8-27 10:27:43	1	42	1	1	1	0	22yrs, 15/day	Occasional	163	66	24.841	125	81	82	92	0.891304	70			49	36	48.1	4.33	95	399	2.52	4.9	1.21	2.62	72	32	3.68	141	4.55	59.1	259.76	6.07	387	933	1.16814
934	2	2015-8-27 10:18:32	1	30	0	0	1	0	16yrs, 10/day	Occasional	170	60	20.7612	110	74	73	93	0.784946	72			48	35	46.5	4.72	110	388	1.88	4.18	1.4	2.12	89	25	3.39	159	7.69	64.1	342.67	7.24	388	934	1.51879
935	2	2015-8-27 10:08:37	2	35	0	0	1	0	0	0	156	50	20.5457	109	63	69	90	0.766667	72			15	21	50	4.74	72	243	1.01	6.23	2.16	3.61	55	11	6.46	137	4.52	59.2	127.66	6.56	389	935	1.38197
936	2	2015-8-27 10:19:43	1	49	1	0	1	0	21yrs, 20/day	Occasional	169	80	28.0102	104	70	88	98	0.897959	80			43	31	47.3	5.6	79	428	0.97	4.76	1.55	2.86	86	17	3.82	157	7.5	52.2	182.35	17.68	390	936	4.40036
937	2	2015-8-27 9:38:17	2	37	0	0	1	0	0	0	159	61	24.1288	101	61	80	99	0.808081	74	3.549	3.961	13	13	46.5	4.13	63	266	0.7	4.89	2.01	2.56	54	15	6.1	141	6.1	70.6	315.47	7.86	391	937	1.44275
938	2	2015-8-27 8:55:01	2	35	0	0	1	0	0	0	156	51	20.9566	112	78	65	89	0.730337	78			12	15	44.7	4.87	55	256	0.74	5.06	1.91	2.69	35	13	1.93	144	4.32	59.7	318.06	9.07	392	938	1.96315
939	2	2015-8-27 9:25:45	2	20	0	0	1	0	0	0	157	48	19.4734	98	57	65	87	0.747126	72			14	18	45.1	4.51	49.6	356	1.44	3.96	1.42	1.93	59	9	0.82	133	6.4	68.8	12.18	8.79	393	939	1.76191
940	2	2015-8-27 8:44:50	2	30	0	0	0	0	0	0	163	54	20.3244	115	74	67	93	0.72043	60			23	22	49.9	4.5	57.5	335	0.62	3.98	2	1.76	74	18	6.16	137	5.72	63.8	50.85	6.35	394	940	1.27
941	2	2015-8-27 10:44:15	1	41	1	0	1	0	20yrs, 15/day	Occasional	170	73	25.2595	127	75	82	98	0.836735	75			17	14	47.9	6.16	89	324	1.1	4.12	1.78	1.98	51	26	2.51	153	8.94	63.4	274.01	2.94	395	941	0.804907
942	2	2015-8-27 8:43:41	2	45	0	0	1	0	0	0	157	56	22.719	95	56	72	94	0.765957	72			15	16	45.4	5.27	52.5	220	1.59	4.68	1.38	2.57	49	18	3.96	141	4.49	54.6	101.75	4.81	396	942	1.12661
943	2	2015-8-27 9:20:01	2	30	0	0	0	0	0	0			#DIV/0!					#DIV/0!	72			11	23	46.6	3.99	84.9	336	1.28	4.59	1.9	2.12	43	8	3.42	141	6.19	64.4	89.65	9.35	397	943	1.65807
944	2	2015-8-27 9:21:42	2	39	0	0	1	0	0	0	159	50	19.7777	97	59	70	90	0.777778	72			33	23	46.5	4.82	51.1	248	1.22	3.6	1.49	1.63	78	66	3.79	146	5.07	51.3	82.93	10.96	398	944	2.34788
945	2	2015-8-27 9:43:00	2	37	1	0	0	0	0	0			#DIV/0!	117	81			#DIV/0!	78			12	21	45.5	5	62.2	243	0.72	3.1	1.31	1.39	79	8	4.02	135	4.68	72.4	11.48	5.9	399	945	1.31111
946	2	2015-8-27 8:37:23	1	41	0	0	1	0	5-6yrs, 20/day	Occasional	169	73	25.5593	117	69	85	100	0.85	50			12	24	47.6	4.62	80.4	403	1.74	4.46	1.49	2.13	89	40	4.88	154	6.39	67.9	301.54	8.54	400	946	1.75355
947	2	2015-8-27 10:21:26	1	42	1	0	0	0	25yrs, 20/day	0	170	66	22.8374	121	73	84	94	0.893617	76			73	34	50	5.7	87	371	2.36	5.27	1.23	3.1	141	428	4.8	180	9.01	53.3	208.58	11.53	401	947	2.92093
948	2	2015-8-27 8:59:39	1	76	1	1	1	0	0	0	155	63	26.2227	111	87	94	97	0.969072	96	-2.065	0.164	23	25	45.8	5.31	95	480	1.25	4.1	1.01	2.45	45	31	3.73	122	5.13	71.9	359.84	4.56	402	948	1.07616
949	2	2015-8-27 9:49:07	2	42									#DIV/0!					#DIV/0!				13	13	46.5	4.84	66	302	0.74	4.99	2.04	2.63	42	14	5.33	116	4.31	61	23.72	8.42	403	949	1.81124
950	2	2015-8-27 9:26:36	2	29	0	0	0	0	0	0	163	59	22.2063	107	66	71	91	0.78022	72			35	24	49.1	5.73	60.7	316	1.74	3.61	1.06	1.85	79	34	4.87	128	3.43	50.1	121.13	10.45	404	950	2.66127
951	2	2015-8-27 8:27:49	2	39	0	0	1	0	0	0	167	58	20.7967	118	76	70	93	0.752688	72			19	19	45.3	5.26	57	255	1.26	4.56	1.43	2.57	59	9	2.25	137	6.58	50.6	53.59	7.65	405	951	1.7884
952	2	2015-8-27 9:36:58	2	36	1	0	1	0	0	0	154	48	20.2395	102	67	64	87	0.735632	66			19	24	44.8	4.64	75	238	0.69	4.81	2.01	2.44	79	14	4.78	131	5.22	52.5	47.09	9.82	406	952	2.0251
953	2	2015-8-27 9:50:09	2	47									#DIV/0!					#DIV/0!				27	24	47.4	4.33	52	289	1.54	4.22	1.45	2.17	80	18	2.73	132	5.01	55.9	140.33	5.59	407	953	1.07576
954	2	2015-8-27 10:36:42	1	39	0	1	0	1	0	Occasional	160	52	20.3125	113	73	71	85	0.835294	72	-1.976	-0.641	31	24	48.5	4.82	86	308	1.42	5.69	1.47	3.59	65	19	5.39	154	6.44	60	234.49	7.21	408	954	1.54454
955	2	2015-8-27 8:09:33	2	41	0	0	0	0	0	0	155	52	21.6441	97	61	71	88	0.806818	66	0.794	1.367	9	13	43.4	5.41	62	403	1.09	5.9	1.13	3.96	61	14	6.62	138	5.65	61	60.53	12.28	409	955	2.95266
956	2	2015-8-27 10:34:57	2	51	1	0	1	0	0	0	155	67	27.8876	129	74	84	97	0.865979	72			36	31	48.7	4.89	46	299	1.95	6.15	1.53	3.78	79	45	2.89	135	6.03	63.7	26.91	7.2	410	956	1.5648
957	2	2015-8-27 10:41:26	2	41	0	0	1	1	0	0	153	55	23.4952	108	68	66	93	0.709677	78			25	20	50.2	4.93	68	307	0.95	4.07	1.72	1.98	57	29	2.34	134	5.16	59.1	127.38	13.27	411	957	2.9076
958	2	2015-8-27 8:56:41	2	49	0	0	1	0	0	0	148	46	21.0007	134	77	67	84	0.797619	78			28	19	47.2	8.5	62	330	2.29	6.17	1.64	3.47	82	59	6.29	134	11.12	82	205.99	6.97	412	958	2.63311
959	2	2015-8-27 9:56:43	1	45	0	0	1	0	21yrs, 10/day	0	165	73	26.8136	123	71	87	95	0.915789	72			22	20	47.6	4.73	112	390	2	4.01	0.92	2.21	87	11	2.4	161	9.17	68.6	115.74	7.63	413	959	1.604
960	2	2015-8-27 8:51:09	2	36	0	0	0	0	0	Occasional	159	48	18.9866	109	59	67	92	0.728261	72	-1.9	-1.524	9	14	43.7	5.3	59	262	1.05	3.92	2.19	1.43	46	10	4.04	139	4.8	46.3	25.8	2.61	414	960	0.6148
961	2	2015-8-27 10:43:42	1	48	0	0	0	0	20yrs, 10/day	Occasional	166	73	26.4915	126	78	85	97	0.876289	72			18	15	46.4	4.62	57	383	0.66	3.27	1.17	1.74	77	28	6.22	159	6.64	50	58.73	8.76	415	961	1.79872
962	2	2015-8-27 10:48:03	1	47	1	0	1	0	0	Occasional	180	84	25.9259	144	89	88	100	0.88	70	-1.329	0.302	27	30	46.2	4.73	93	353	0.8	4.68	1.2	2.91	62	22	3.84	156	5.51	55.8	207.29	10.68	416	962	2.24517
963	2	2015-8-27 10:25:57	2	56							159	49	19.3821	119	68	69	84	0.821429				16	27	45.8	5.29	35	218	3.63	3.61	1.89	1.62	93	21	2.79	112	5.53	60.3	147.33	9.57	417	963	2.25001
964	2	2015-8-27 10:07:45	2	43	0	0	0	0	0	0	155	46	19.1467	94	54	63	87	0.724138	60			12	20	31.8	5.05	42	213	0.77	5.96	1.91	3.57	43	13	4.71	125	5.78	50.4	52.73	4.26	418	964	0.956133
965	2	2015-8-27 8:30:57	2	27	0	0	1	0	0	0	155	46	19.1467	100	70	62	86	0.72093	78	0.197	0.32	16	14	47.9	5.31	40.7	231	0.7	3.5	1.96	1.27	62	11	4.74	139	5.87	53.5	47.64	14.19	419	965	3.34884
966	2	2015-8-27 9:43:02	1	35	0	0	1	0	0	Occasional	188	81	22.9176	127	83	84	100	0.84	70			14	14	50.5	5.91	89	285	0.8	2.99	1.23	1.45	60	16	3.14	150	4.9	56.2	124.92	17.29	420	966	4.54151
967	2	2015-8-27 8:29:54	1	78	1	1	0	0	0	0	172	75	25.3515	130	73	100	99	1.0101	72			31	22	45.9	10.76	101.9	399	1.07	3.44	1.22	1.66	63	20	1.99	165	7.39	72.8	292.15	15.37	421	967	7.35028
968	2	2015-8-27 9:34:27	2	43	0	1	1	1	0	0	155	64	26.6389	113	68	76	96	0.791667	72	0.726	1.389	18	21	46.7	4.91	68	365	1	4.53	1.4	2.59	56	21	1.29	137	8.28	58	72.2	9.24	422	968	2.01637
969	2	2015-8-27 9:57:36	2	28	0	0	0	0	0	0	158	58	23.2335	114	69	76	93	0.817204	70			42	22	46.4	4.39	47	284	1.09	5.4	1.97	2.99	77	46	1.81	116	7.87	53	88.32	13.3	423	969	2.59498
970	2	2015-8-27 10:42:29	2	48							151	51	22.3674	109	65	77	92	0.836957				14	24	47.4	4.78	53.7	246	1	3.92	1.65	1.89	59	10	8.08	133	5.3	70.4	22.17	5.56	424	970	1.18119
971	2	2015-8-27 9:48:15	1	72	1	0	0	0	0	0	158	61	24.4352	125	55			#DIV/0!	66			18	28	39.5	5.81	201.9	378	2.45	4.7	0.81	2.85	97	19	1.89	108	5.01	60.6	31.4	13.73	425	971	3.54539
972	2	2015-8-27 8:39:37	2	66							157	57	23.1247	117	75	72	92	0.782609		-1.853	0.205	20	25	47.8	4.62	59	233	1.27	4.46	1.71	2.27	70	16	5.9	141	5.9	55.3	156.78	6.1	426	972	1.25253
973	2	2015-8-27 9:25:13	2	43	0	0	1	0	O	0			#DIV/0!					#DIV/0!	84			12	15	48.8	4.98	63	231	1.52	4.26	1.07	2.62	92	18	3.96	136	6.36	57.1	150.07	7.96	427	973	1.76181
974	2	2015-8-27 8:30:18	2	35	0	0	1	0	0	0	165	55	20.202	98	57	72	88	0.818182	72			17	21	48.2	4.75	52	306	1.16	4.42	1.81	2.1	87	15	2.46	128	6.2	64.7	92.29	10.27	428	974	2.16811
975	2	2015-8-27 10:16:43	1	36	0	0	0	0	11yrs,20/day	Occasional	157	59	23.9361	131	81	71	86	0.825581	78			13	19	50.6	4.5	64	367	1.06	4.67	1.5	2.6	85	16	4.71	159	9.21	73.6	285.34	15.6	429	975	3.12
976	2	2015-8-27 10:21:33	1	27	0	0	0	0	0	Occasional	174	60	19.8177	123	78	76	88	0.863636	72			32	29	47.9	4.71	80	313	7.97	5.89	1.05	1.46	50	8	2.99	155	5.63	57.8	307.37	13.74	430	976	2.87624
977	2	2015-8-27 10:25:13	2	23	0	0	0	0	0	0	159	44	17.4044	110	68	59	83	0.710843	78	1.453	1.503	14	20	42.2	3.97	58.4	297	0.6	3.34	2	1.16	56	12	1.41	137	8.2	67.9	27.3	11	431	977	1.94089
978	2	2015-8-27 10:16:34	1	49	0	1	0	1	3yrs, 5/day	Occasional	166	65	23.5883	127	80	85	92	0.923913	74			31	23	45	4.67	64	327	1.41	4.95	1.23	3.09	68	15	3.65	152	5.51	52.1	187.85	8.02	432	978	1.6646
979	2	2015-8-27 8:33:41	1	68	1	0	1	0	0	0	164	65	24.1672	144	75	94	96	0.979167	74	-0.876	1.235	13	18	43.3	7.87	96	303	3.25	4.72	1.04	2.37	59	10	1.7	146	5.47	58.1	114.89	12.62	433	979	4.4142
980	2	2015-8-27 9:12:12	2	50	0	0	1	0	0	0	150	50	22.2222	105	74	77	87	0.885057	78			52	35	41.2	5.91	44	236	2.34	9.97	1.71	6.8	121	188	12.86	150	6.08	56.7	220.57	10.08	434	980	2.64768
981	2	2015-8-27 9:56:12	1	50	1	0	1	0	30yrs, 10/day	Occasional	161	75	28.9341	132	79	90	104	0.865385	60	0.263	1.984	16	19	45.6	4.9	83	470	1.21	5.6	1.36	3.52	70	20	3.25	162	5.58	61.8	137.21	4.09	435	981	0.890711
982	2	2015-8-27 8:57:53	2	41	0	0	1	0	0	0	158	55	22.0317	108	79	73	89	0.820225	72	0.769	1.342	16	12	47.3	5.1	57	215	0.88	5.13	1.9	2.89	71	17	3.12	157	7.31	67	139.57	15.72	436	982	3.5632
983	2	2015-8-27 10:57:42	2	36	0	0	0	1	0	0	159	64	25.3155	113	68	77	100	0.77	64			16	22	45.7	5.09	66	265	0.88	3.11	1.41	1.4	51	8	1.3	106	5.95	56.2	31.89	8	437	983	1.80978
984	2	2015-8-27 8:47:21	1	52	0	0	0	0	0	0	164	67	24.9108	134	86	88	97	0.907216	72	0.646	2.422	20	21	45.4	4.45	77	459	4.48	5.81	0.92	2.79	55	27	2.58	172	5.78	49.3	458.62	11.57	438	984	2.28829
985	2	2015-8-27 8:21:11	1	58	0	0	1	0	0	often	182	70	21.1327	117	68	79	98	0.806122	70	-2.424	-0.504	12	15	49.7	5.2	85	382	0.97	4.37	1.61	2.41	63	23	5.37	156	4.89	64	159.34	9.85	439	985	2.27644
986	2	2015-8-27 10:38:44	2	48	0	0	1	0	0	0	154	47	19.8178	124	68	67	88	0.761364	72	0.327	1.243	17	19	46.5	4.83	49.1	224	1.02	5.81	1.89	3.39	78	11	2.24	147	6.46	68.2	379.6	6.9	440	986	1.4812
987	2	2015-8-27 10:20:41	1	30	0	0	0	0	0	Occasional	173	73	24.3911	93	61	83	96	0.864583	72			22	19	48.4	5.48	96	339	1.59	4.62	1.16	2.75	57	16	1.85	142	5.17	52.1	90.02	13.6	441	987	3.31236
988	2	2015-8-27 10:09:20	2	51	0	0	1	0	0	0	155	48	19.9792	104	61	86	84	1.02381	78			41	35	45	4.85	72	365	1.02	4.36	1.56	2.38	59	13	2.38	140	5.49	64.5	325.18	10.13	442	988	2.18358
989	2	2015-8-27 10:04:55	1	45	0	0	1	0	Occasional	0	169	66	23.1084	101	63	82	96	0.854167	66	3.651	5.216	25	21	41.9	4.26	83.5	324	3.35	4.26	0.83	1.83	78	19	3.47	155	5.09	47.9	411.01	12.7	443	989	2.40453
990	2	2015-8-27 9:56:05	1	26	1	0	0	0	0	Occasional	173	94	31.4077	138	83	96	111	0.864865	76			61	31	48.9	5.76	98	485	0.9	3.03	1.2	1.48	55	28	2.06	167	5.17	55.3	359.51	16.91	444	990	4.32896
991	2	2015-8-27 8:38:20	2	30	0	0	0	1	0	0	155	59	24.5578	96	67	73	99	0.737374	78			23	23	46.7	4.86	63.9	347	0.98	4.97	1.62	2.86	80	29	3.91	127	5.65	45.9	113.74	5.51	445	991	1.19016
992	2	2015-8-27 11:08:01	2	40	0	1	0	0	0	0	167	65	23.3067	112	64	74	101	0.732673	66			10	12	42.1	5.15	55	257	1.21	5.18	1.38	3.22	22	13	1.29	136	4.01	51.4	54.67	11.7	446	992	2.678
993	2	2015-8-27 9:52:39	2	46	0	0	1	0	0	0	156	50	20.5457	143	80	77	90	0.855556	120	-1.975	-1.164	22	22	43.1	4.97	69	242	1.42	5.43	1.36	3.35	78	27	8.33	149	7.61	70.2	25.94	9.94	447	993	2.19564
994	2	2015-8-27 10:21:56	2	35	0	0	0	0	0	0	158	51	20.4294	100	65	73	92	0.793478	80	0.14	0.481	12	20	43.3	4.71	59	173	0.54	4.32	2.34	1.85	70	7	2.35	135	4.68	52.6	56.69	8.56	448	994	1.79189
995	2	2015-8-27 10:37:55	2	27	1	0	1	0	0	0	153	45	19.2234	100	73	66	86	0.767442	66			35	30	47.1	5.53	50	256	0.62	4.21	2.1	1.79	57	10	2.7	125	6.04	68.1	42.5	13.4	449	995	3.29342
996	2	2015-8-27 10:35:27	2	37	0	0	0	0	0	0	154	57	24.0344	114	79	75	90	0.833333	72			10	15	47.9	5.18	72	228	1.18	5.48	1.84	3.1	60	10	1.78	138	6.25	63.7	59.55	11.53	450	996	2.65446
997	2	2015-8-27 10:43:59	2	37	0	1	1	0	0	0			#DIV/0!	170	102			#DIV/0!	84			15	17	41.7	5.32	65	33	0.64	4.6	1.7	2.55	53	13	2.2	156	8.54	69.2	222.76	12.05	90	997	2.84916
998	2	2015-8-27 8:36:39	1	52	0	0	1	0	30yrs, 10/day	Occasional	169	73	25.5593	138	93	90	100	0.9	64	0.15	1.926	35	26	45.9	4.83	89.9	431	2.44	6.18	1.37	3.85	64	61	5.76	161	7.17	55.2	408.78	12.81	1	998	2.74988
999	2	2015-8-27 10:25:07	2	30	0	0	1	0	0	Occasional	163	43	16.1843	103	65	57	82	0.695122	72	-0.751	-0.558	11	21	49.8	4.85	48.8	179	0.8	4.62	2.16	2.15	54	10	3.34	145	5.64	55.6	132.52	12.86	2	999	2.77204
1000	2	2015-8-27 9:54:45	2	38							162	50	19.052	107	63	65	85	0.764706				11	17	50.3	4.67	59	306	0.58	4.73	1.89	2.49	68	10	2.21	119	6.11	64.6	75.98	11.73	3	1000	2.43463
1001	2	2015-8-27 9:56:29	1	52	0	0	1	0	0	Occasional	163	63	23.7118	135	90	83	92	0.902174	76			16	22	45.9	4.9	78	300	0.89	3.82	1.4	2.08	61	19	1.85	157	4.24	54	401.95	12.39	4	1001	2.69827
1002	2	2015-8-28 9:15:49	1	74	0	0	0	1	53yrs, 20/day	0	160	51	19.9219	133	72	73	86	0.848837	60			19	30	42.5	4.94	63	432	0.82	4.59	1.28	2.75	61	21	1.82	136	8.67	54.2	122.04	9.71	5	1002	2.13188
1003	2	2015-8-28 8:47:54	1	40	0	0	0	0	0	Occasional	165	69	25.3444	134	79	81	92	0.880435	74	0.504	1.881	19	31	48.7	5.02	106	307	1.25	5.43	1.85	2.98	76	22	2.75	142	5.2	52	74.67	12.18	6	1003	2.71749
1004	2	2015-8-28 9:14:46	1	54	0	0	1	0	0	0	170	68	23.5294	105	62	85	95	0.894737	56	-1.943	-0.116	53	34	43.1	4.94	85.1	294	1.66	5.78	1.03	3.75	80	58	2.94	168	5.74	55.6	367.15	10.29	7	1004	2.25923
1005	2	2015-8-28 8:36:12	1	41									#DIV/0!					#DIV/0!		-0.196	1.221	24	19	49.5	5.08	85	397	1.52	5.67	1.24	3.64	79	12	4.98	167	6.46	62.4	357.72	16.21	8	1005	3.65986
1006	2	2015-8-28 10:24:59	2	45	0	0	1	0	0	0	158	52	20.83	98	58	68	90	0.755556	72			11	18	45.9	4.8475	75	227	1.14	6.49	1.75	4.13	62	8	4.25	139	6.35	61.9	113.35	11.84	9	1006	2.55086
1007	2	2015-8-28 8:41:22	2	47	0	1	0	1	0	0	155	51	21.2279	94	56	71	92	0.771739	60	-0.094	0.768	13	21	45.3	4.41	55	192	0.82	5.03	1.89	2.8	74	11	2.93	126	5.93	57.7	97.64	12.68	10	1007	2.48528
1008	2	2015-8-28 9:08:23	1	33	0	0	0	0	Occasional	Occasional	169	65	22.7583	113	76	76	93	0.817204	60	-0.436	0.603	56	33	48.9	4.48	78	425	0.86	5.02	1.69	2.92	55	20	2.02	158	5.22	47.5	262.44	8.94	11	1008	1.78005
1009	2	2015-8-28 9:45:30	2	20	0	0	0	0	0	0	161	51	19.6752	94	60	70	92	0.76087	56			16	19	45.8	4.27	52	254	0.9	4.91	1.44	2.8	41	14	1.45	138	5.64	57.2	66.11	12.03	12	1009	2.28303
1010	2	2015-8-28 9:17:08	1	46	1	0	1	0	22yrs, 10/day	often	168	69	24.4473	111	76	82	96	0.854167	70			32	29	48.7	4.74	71	485	0.92	4.86	1.68	2.72	58	54	3.46	166	4.73	51.7	298.21	9.14	13	1010	1.92549
1011	2	2015-8-28 10:34:24	2	42	1	0	1	0	0	0	161	54	20.8325	99	63	68	90	0.755556	66	1.777	2.394	6	16	43.9	5.07	65	249	1.04	4.14	1.12	2.51	55	6	4.02	122	4.82	67.1	21.37	10.31	14	1011	2.32319
1012	2	2015-8-28 10:20:46	2	64							153	52	22.2137	126	82	75	91	0.824176		-2.043	-0.123	13	26	49.6	4.73	79	446	0.74	4.33	2.4	1.82	91	16	2.85	144	5.09	51.2	61.12	12.78	15	1012	2.68664
1013	2	2015-8-28 10:02:17	1	38	0	0	1	0	21yrs, 10/day	Occasional	167	70	25.0995	127	84	83	96	0.864583	70			86	39	49	5.94	78	420	1.92	6.27	1.3	4.06	104	95	3.52	163	6.71	66.7	346.99	15.12	16	1013	3.99168
1014	2	2015-8-28 9:39:42	2	28	0	0	1	0	0	0	159	49	19.3821	93	62	70	85	0.823529	66			19	20	51.7	4.07	50	272	0.87	4.01	1.51	2.12	95	49	2.13	142	5.44	67.6	33.03	13.08	17	1014	2.36603
1015	2	2015-8-28 8:26:25	2	39	0	0	0	0	0	0	154	54	22.7694	122	78	76	93	0.817204	72	0.187	0.676	15	14	47.8	5.14	65	276	1.45	6.34	2.05	3.55	56	13	5.37	137	8.39	60	76.91	13.67	18	1015	3.12284
1016	2	2015-8-28 10:32:14	2	47	0	0	1	0	0	0	156	51	20.9566	115	76	75	89	0.842697	72			71	53	45.6	5.25	72	306	1.58	3.66	1.45	1.66	94	65	6.44	95	4.16	51.7	8.47	12.18	19	1016	2.842
1017	2	2015-8-28 8:37:05	1	51	1	0	0	0	20yrs	Occasional	167	65	23.3067	112	79	84	94	0.893617	60	-0.091	1.658	40	27	46.9	5.94	77.6	222	0.72	2.84	1.42	1.18	47	20	3	160	5.18	51.9	400.33	14.31	20	1017	3.77784
1018	2	2015-8-28 10:23:48	2	50	0	0	1	0	0	0	156	55	22.6003	86	62	71	91	0.78022	70			15	21	43.3	4.37	86	271	0.99	3.76	1.9	1.58	71	11	3	136	6.16	59.7	20.96	6.97	21	1018	1.35373
1019	2	2015-8-28 9:36:48	1	31	0	0	0	0	Occasional	Occasional			#DIV/0!	105	71			#DIV/0!	78	-0.36	0.534	29	28	50.3	4.86	89	363	0.55	3.83	1.6	1.96	78	27	3.58	163	6.43	62.1	337.56	11.82	22	1019	2.55312
1020	2	2015-8-28 9:59:00	2	36	0	0	1	0	0	0	161	47	18.132	110	71	68	81	0.839506	78			16	21	48.4	5.1	70	374	1.71	5.21	1.69	2.81	63	27	2.82	147	5.36	55.9	28.32	12.73	23	1020	2.88547
1021	2	2015-8-28 10:31:08	2	55	0	0	0	1	0	0	150	52	23.1111	99	67	79	88	0.897727	72	0.713	2.039	27	28	40.1	5.18	69	233	1.16	4.91	1.87	2.76	110	23	4.02	144	6.43	65.3	77.06	15.14	24	1021	3.48556
1022	2	2015-8-28 8:33:43	1	41	0	0	1	1	Occasional	often	170	56	19.3772	123	96	71	87	0.816092	78			48	78	45.4	7.51	74	329	5.97	6.06	1.35	1.79	162	571	6.15	159	5.64	55.7	313.17	11.54	25	1022	3.8518
1023	2	2015-8-28 10:05:58	1	43	0	0	0	1	10yrs, 30/day	often	169	67	23.4586	123	90	83	91	0.912088	70	-1.156	-0.075	30	34	49.1	4.78	85	362	0.69	5.3	3.03	2.28	57	32	4.55	163	6.72	62.1	346.34	3.81	26	1023	0.809413
1024	2	2015-8-28 10:31:39	2	28	0	0	1	0	0	0	163	59	22.2063	102	68	71	95	0.747368	78			9	14	43.9	4.73	77.1	366	1.67	4.85	1.48	2.71	66	12	2.43	136	8.42	65.6	29.6	25.12	27	1024	5.28078
1025	2	2015-8-28 9:55:42	1	58	1	0	1	0	0	0	163	62	23.3355	130	80	84	96	0.875	62	-0.997	0.924	32	28	42.3	4.7	80	355	1.24	4.47	1.43	2.55	75	19	2.28	161	11.07	69.6	140.96	17.06	28	1025	3.56364
1026	2	2015-8-28 10:27:10	2	27	0	0	1	0	0	0	163	57	21.4536	101	58	67	99	0.676768	80			9	15	49.6	5.48	53	178	0.92	3.64	1.49	1.76	40	15	1.56	126	4.93	61.5	37.5	13.55	29	1026	3.30018
1027	2	2015-8-28 8:34:18	1	50	1	0	0	0	30yrs, 20/day	0	163	76	28.6048	134	84	86	96	0.895833	72			25	23	46.9	5.2	106	340	1.53	4.75	1.2	2.75	89	32	2.28	154	6.99	54.4	187.32	10.21	30	1027	2.35964
1028	2	2015-8-28 10:06:59	1	45	0	0	1	0	10yrs, 6/day	often	169	78	27.31	141	93	95	97	0.979381	60	1.72	3.285	40	38	45.2	4.69	94	407	0.74	4.82	1.52	2.85	51	35	2.8	144	4.91	47.9	336.59	9.85	31	1028	2.05318
1029	2	2015-8-28 9:22:03	1	23	0	0	1	0	7yr, 10/day	Occasional	177	66	21.0667	112	68	69	93	0.741935	74	0.834	1.139	23	22	49	5.22	85	393	0.87	3.93	1.35	2.22	88	25	1.63	170	6.73	46.7	217.89	10.19	32	1029	2.36408
[truncated: 51 more rows]
